# Supplementary material for: Dancing silanols: stereospecific rearrangements of silanol epoxides into silanoxy-tetrahydrofurans and silanoxy-tetrahydropyrans
Source: Royal Society of Chemistry journal article supplement (doi:10.1039/d3qo00427a), 2023-01-01

## Supporting Information

# **Dancing Silanols: Stereospecific Rearrangements of Silanol Epoxides into Silanoxy-Tetrahydrofurans and Silanoxy-Tetrahydropyrans**

Harshit Joshi<sup>a</sup>, Annu Anna Thomas<sup>a</sup>, Joel T. Mague<sup>b</sup>, and Shyam Sathyamoorthi<sup>a,\*</sup>

<sup>a</sup> University of Kansas, Department of Medicinal Chemistry, Lawrence, KS, USA (66047)

<sup>b</sup> Tulane University, Department of Chemistry, New Orleans, LA, USA (70118)

[\\*ssathyam@ku.edu](mailto:ssathyam@ku.edu)

- I. General Considerations
- II. Additional Optimization Experiments
- III. Preparation of Alkenyl Silanols
- IV. Characterization of Alkenyl Silanols
- V. Preparation of Silanol Epoxides
- VI. Characterization of Silanol Epoxides
- VII. Rearrangement Reaction Procedures (Includes Scale-Up Procedure)
- VIII. Characterization of Rearrangement Products
- IX. X-ray crystallography
- X. Structural Reasoning
- XI. Control Experiments (Additional Details and Relevant Characterization)
- XII. Natural Products Section
- XIII. Copies of NMR Spectra

## I. General Considerations

All reagents were obtained commercially unless otherwise noted. Solvents were purified by passage under 10 psi N<sub>2</sub> through activated alumina columns. Infrared (IR) spectra were recorded on a Thermo Scientific™ Nicolet™ iS™5 FT-IR Spectrometer; data are reported in frequency of absorption (cm<sup>-1</sup>). <sup>1</sup>H NMR spectra were recorded at 400, 500, or 600 MHz. Data are recorded as: chemical shift in ppm referenced internally using residual solvent peaks, multiplicity (s = singlet, d = doublet, t = triplet, q = quartet, m = multiplet or overlap of nonequivalent resonances), integration, coupling constant (Hz). <sup>13</sup>C NMR spectra were recorded at 101 or 126 MHz. Exact mass spectra were recorded using an electrospray ion source (ESI) either in positive mode or negative mode and with a time-of-flight (TOF) analyzer on a Waters LCT Premier™ mass spectrometer and are given in m/z. Thin Layer Chromatography (TLC) was performed on pre-coated glass plates (Merck) and visualized either with a UV lamp (254 nm) or by dipping into a solution of KMnO<sub>4</sub>-K<sub>2</sub>CO<sub>3</sub> or of ceric ammonium molybdate in water followed by heating. Flash chromatography was performed on silica gel (230-400 mesh) or Florisil (60-100 mesh). *Note on compound numbering for the Supporting Information:* Silanol starting materials are numbered according to the corresponding manuscript epoxide. Thus, silanol **S1** was the starting material for epoxide substrate **1**, silanol **S3** was the starting material for epoxide substrate **3**, etc.

## II. Additional Optimization Experiments

Solvent Screening:

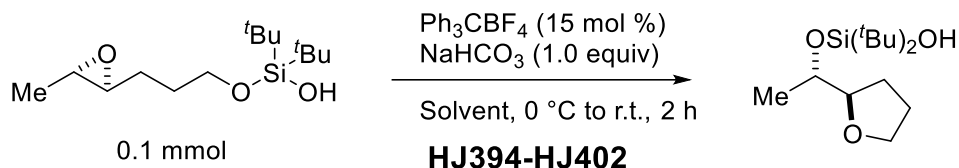

| Reaction No. | Lewis acid        | SM remaining (%) | Product yield (%) (by <sup>1</sup> H NMR) |
|--------------|-------------------|------------------|-------------------------------------------|
| <b>HJ394</b> | THF               | 93               | 0                                         |
| <b>HJ395</b> | DME               | 100              | 0                                         |
| <b>HJ396</b> | Dioxane           | 100              | 0                                         |
| <b>HJ397</b> | MeOH              | 94               | 0                                         |
| <b>HJ398</b> | EtOAc             | 97               | 0                                         |
| <b>HJ399</b> | Acetone           | 84               | 03                                        |
| <b>HJ400</b> | MeCN              | 79               | 16                                        |
| <b>HJ401</b> | MeNO <sub>2</sub> | 0                | 75                                        |
| <b>HJ402</b> | Toluene           | 80               | 15                                        |

**Note: Catalyst Loading of less than 15% leads to lower product yields.**

### III. Preparation of Alkenyl Silanols

#### General Procedure A

Silanols were prepared according to the procedures disclosed in *Org. Lett.* **2020**, *22*, 8665–8669 and in *Org. Lett.* **2022**, *24*, 6202–6207. In general, the procedures give comparable yields of silanol products, but the latter procedure is operationally simpler on scale as it avoids the use of DMF.

Representative Schemes for Starting Material Preparation:

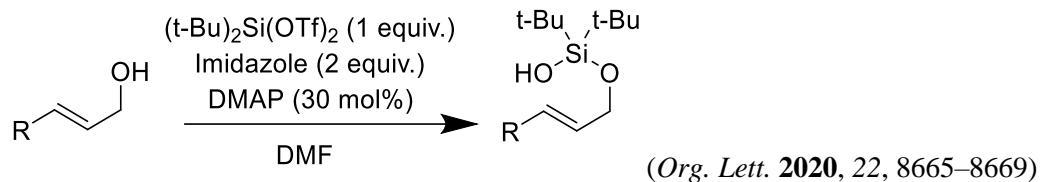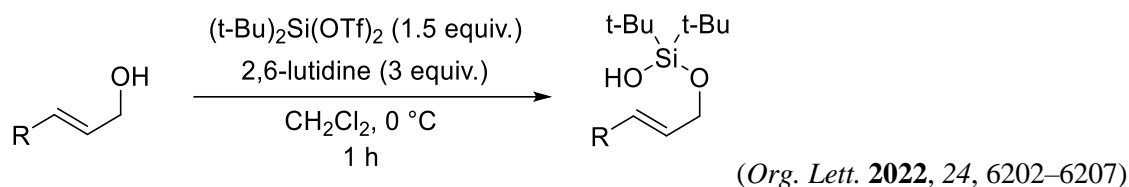

### IV. Characterization of Alkenyl Silanols

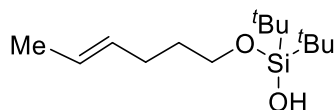

(*E*)-di-*tert*-butyl(hex-4-en-1-yloxy)silanol

**Compound S1:** Synthesized using General Procedure A on a 10 mmol scale; Purified using a gradient of 10-30% CH<sub>2</sub>Cl<sub>2</sub> in hexane on silica gel; (colorless oil, 2.12 g, 8.2 mmol, 82% yield).

<sup>1</sup>H NMR (400 MHz, CDCl<sub>3</sub>) δ 5.52 – 5.32 (m, 2H), 3.78 (t, *J* = 6.4 Hz, 2H), 2.17 – 1.99 (m, 2H), 1.78 (s, 1H), 1.67 – 1.53 (m, 5H), 1.01 (s, 18H).

<sup>13</sup>C{<sup>1</sup>H} NMR (101 MHz, CDCl<sub>3</sub>) δ 131.1, 125.2, 63.0, 32.9, 29.0, 27.6, 20.6, 18.1.

IR ν 3501, 2934, 2860, 1471, 1106, 827 cm<sup>-1</sup>

HRMS (ESI) *m/z* = [*M* + Na<sup>+</sup>] Calcd for C<sub>14</sub>H<sub>30</sub>O<sub>2</sub>SiNa<sup>+</sup> 281.1913, found 281.1909 (1.4 ppm error).

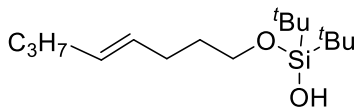

(*E*)-di-*tert*-butyl(oct-4-en-1-yloxy)silanol

**Compound S3:** Synthesized using General Procedure A on a 2.0 mmol scale; Purified using a gradient of 10-30% CH<sub>2</sub>Cl<sub>2</sub> in hexane on silica gel; (colorless oil, 349 mg, 1.22 mmol, 61% yield).

<sup>1</sup>H NMR (400 MHz, CDCl<sub>3</sub>) δ 5.52 – 5.30 (m, 2H), 3.79 (t, *J* = 6.4 Hz, 2H), 2.11 – 2.02 (m, 2H), 1.99 – 1.91 (m, 2H), 1.80 (s, 1H), 1.65 – 1.55 (m, 2H), 1.36 (h, *J* = 7.3 Hz, 2H), 1.01 (s, 18H), 0.88 (t, *J* = 7.3 Hz, 3H).

<sup>13</sup>C{<sup>1</sup>H} NMR (101 MHz, CDCl<sub>3</sub>) δ 130.8, 130.0, 63.0, 34.9, 32.9, 29.0, 27.6, 22.9, 20.6, 13.8.

IR ν 3502, 2933, 2859, 1473, 1107, 827, 648 cm<sup>-1</sup>.

HRMS (ESI-TOF) *m/z* = [M + Na<sup>+</sup>] Calcd C<sub>16</sub>H<sub>34</sub>O<sub>2</sub>SiNa<sup>+</sup> 309.2226, found 309.2224 (0.6 ppm error).

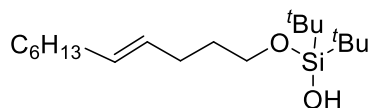

(*E*)-di-*tert*-butyl(undec-4-en-1-yloxy)silanol

**Compound S5:** Synthesized using General Procedure A on a 2.0 mmol scale; Purified using a gradient of 10-30% CH<sub>2</sub>Cl<sub>2</sub> in hexane on silica gel; (colorless oil, 415 mg, 1.26 mmol, 63% yield).

<sup>1</sup>H NMR (400 MHz, CDCl<sub>3</sub>) δ 5.48 – 5.29 (m, 2H), 3.79 (t, *J* = 6.4 Hz, 2H), 2.11 – 2.02 (m, 2H), 2.01 – 1.93 (m, 2H), 1.64 – 1.56 (m, 2H), 1.35 – 1.23 (m, 8H), 1.01 (s, 18H), 0.88 (t, *J* = 6.8 Hz, 3H).

<sup>13</sup>C{<sup>1</sup>H} NMR (100 MHz, CDCl<sub>3</sub>) δ 131.1, 129.8, 63.0, 32.9, 32.8, 31.9, 29.7, 29.01, 28.96, 27.6, 22.8, 20.6, 14.3.

IR ν 3496, 2930, 2857, 1471, 1107, 828, 647 cm<sup>-1</sup>.

HRMS (ESI-TOF) *m/z* = [M + H<sup>+</sup>] Calcd C<sub>19</sub>H<sub>41</sub>O<sub>2</sub>Si<sup>+</sup> 329.2876, found 329.2869 (2.1 ppm error).

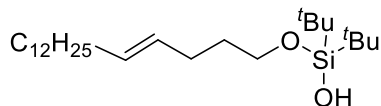

(*E*)-di-*tert*-butyl(heptadec-4-en-1-yloxy)silanol

**Compound S7:** Synthesized using General Procedure A on a 1.0 mmol scale; Purified using a gradient of 10-30% CH<sub>2</sub>Cl<sub>2</sub> in hexane on silica gel; (colorless oil, 322 mg, 0.78 mmol, 78% yield).

<sup>1</sup>H NMR (400 MHz, CDCl<sub>3</sub>) δ 5.48 – 5.32 (m, 2H), 3.79 (t, *J* = 6.4 Hz, 2H), 2.11 – 2.01 (m, 2H), 2.01 – 1.92 (m, 2H), 1.81 (s, 1H), 1.64 – 1.56 (m, 2H), 1.34 – 1.24 (m, 20H), 1.01 (s, 18H), 0.90 – 0.86 (m, 3H).

<sup>13</sup>C{<sup>1</sup>H} NMR (101 MHz, CDCl<sub>3</sub>) δ 131.1, 129.8, 63.0, 32.9, 32.8, 32.1, 29.84, 29.81, 29.79, 29.70, 29.5, 29.4, 29.0, 27.6, 22.8, 20.6, 14.3.

IR  $\nu$  3498, 2926, 2856, 1470, 1109, 828, 647  $\text{cm}^{-1}$ .

HRMS (ESI-TOF)  $m/z = [M + \text{Na}^+]$  Calcd  $\text{C}_{25}\text{H}_{52}\text{O}_2\text{SiNa}^+$  435.3634, found 435.3660 (6.0 ppm error).

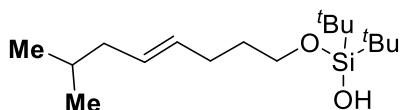

(*E*)-di-*tert*-butyl((7-methyloct-4-en-1-yl)oxy)silanol

**Compound S9:** Synthesized using General Procedure A on a 4.0 mmol scale; Purified using a gradient of 10-30%  $\text{CH}_2\text{Cl}_2$  in hexane on silica gel; (colorless oil, 664 mg, 2.21 mmol, 55% yield).

$^1\text{H}$  NMR (400 MHz,  $\text{CDCl}_3$ )  $\delta$  5.47 – 5.31 (m, 2H), 3.79 (t,  $J = 6.4$  Hz, 2H), 2.12 – 2.02 (m, 2H), 1.89 – 1.83 (m, 2H), 1.79 (s, 1H), 1.65 – 1.51 (m, 3H), 1.01 (s, 18H), 0.87 (d,  $J = 6.6$  Hz, 6H).

$^{13}\text{C}\{^1\text{H}\}$  NMR (101 MHz,  $\text{CDCl}_3$ )  $\delta$  131.0, 129.7, 63.0, 42.2, 33.0, 29.0, 28.6, 27.6, 22.4, 20.6.

IR  $\nu$  3499, 2954, 2933, 2897, 2860, 1471, 1107, 968, 827, 647  $\text{cm}^{-1}$ .

HRMS (ESI-TOF)  $m/z = [M + \text{H}^+]$  Calcd  $\text{C}_{17}\text{H}_{37}\text{O}_2\text{Si}^+$  301.2563, found 301.2556 (2.3 ppm error).

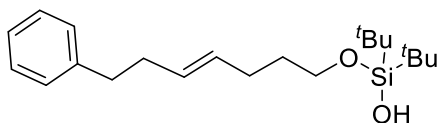

(*E*)-di-*tert*-butyl((7-phenylhept-4-en-1-yl)oxy)silanol

**Compound S11:** Synthesized using General Procedure A on a 4.0 mmol scale; Purified using a gradient of 10-30%  $\text{CH}_2\text{Cl}_2$  in hexane on silica gel; (colorless oil, 782 mg, 2.24 mmol, 56% yield).

$^1\text{H}$  NMR (400 MHz,  $\text{CDCl}_3$ )  $\delta$  7.38 – 7.32 (m, 2H), 7.28 – 7.19 (m, 3H), 5.60 – 5.47 (m, 2H), 3.84 (t,  $J = 6.4$  Hz, 2H), 2.74 (dd,  $J = 9.0, 6.7$  Hz, 2H), 2.43 – 2.33 (m, 2H), 2.20 – 2.09 (m, 2H), 1.86 (s, 1H), 1.72 – 1.62 (m, 2H), 1.09 (s, 18H).

$^{13}\text{C}\{^1\text{H}\}$  NMR (101 MHz,  $\text{CDCl}_3$ )  $\delta$  142.3, 130.6, 129.9, 128.6, 128.4, 125.8, 62.9, 36.2, 34.6, 32.9, 28.9, 27.6, 20.6.

IR  $\nu$  3499, 2933, 2857, 1471, 1109, 827, 698, 645  $\text{cm}^{-1}$ .

HRMS (ESI-TOF)  $m/z = [M + \text{H}^+]$  Calcd  $\text{C}_{21}\text{H}_{37}\text{O}_2\text{Si}^+$  349.2563, found 349.2550 (3.7 ppm error).

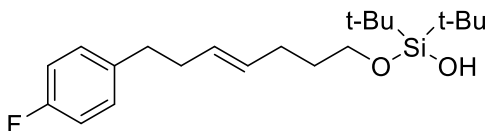

(*E*)-di-*tert*-butyl((7-(4-fluorophenyl)hept-4-en-1-yl)oxy)silanol

**Compound S13:** Synthesized using General Procedure A on a 2 mmol scale; Purified using a gradient of 10-30% CH<sub>2</sub>Cl<sub>2</sub> in hexane on silica gel; (colorless oil, 461 mg, 1.26 mmol, 63% yield).

<sup>1</sup>H NMR (400 MHz, CDCl<sub>3</sub>) δ 7.17 – 7.06 (m, 2H), 7.01 – 6.90 (m, 2H), 5.47 – 5.40 (m, 2H), 3.77 (t, *J* = 6.4 Hz, 2H), 2.64 (dd, *J* = 8.8, 6.7 Hz, 2H), 2.33 – 2.23 (m, 2H), 2.12-2.01 (m, 2H), 1.64 – 1.53 (m, 2H), 1.02 (s, 18H).

<sup>13</sup>C{<sup>1</sup>H} (101 MHz, CDCl<sub>3</sub>) δ 161.3 (d, *J* = 243.2 Hz), 137.8 (d, *J* = 3.5 Hz), 130.9, 129.9 (d, *J* = 7.5 Hz), 129.6, 115.1 (d, *J* = 21.2 Hz), 62.9, 35.4, 34.7, 32.8, 28.9, 27.6, 20.6.

<sup>19</sup>F NMR (377 MHz, CDCl<sub>3</sub>) δ -118.51 – -118.76 (m, *J* = 5.5 Hz).

IR ν 2965, 2857, 1510, 1471, 1224, 1107, 827 cm<sup>-1</sup>.

HRMS (ESI-TOF) *m/z* = [M + Na<sup>+</sup>] Calcd C<sub>21</sub>H<sub>35</sub>FO<sub>2</sub>SiNa<sup>+</sup> 389.2288, found 389.2284 (1.0 ppm error).

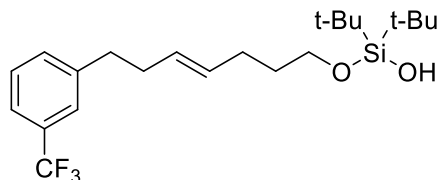

(*E*)-di-*tert*-butyl((7-(3-(trifluoromethyl)phenyl)hept-4-en-1-yl)oxy)silanol

**Compound S15:** Synthesized using General Procedure A on a 2 mmol scale.; Purified using a gradient of 10-30% CH<sub>2</sub>Cl<sub>2</sub> in hexane on silica gel; (colorless oil, 541 mg, 1.30 mmol, 65% yield).

<sup>1</sup>H NMR (400 MHz, CDCl<sub>3</sub>) δ 7.44 (d, *J* = 1.8 Hz, 2H), 7.39 – 7.35 (m, 2H), 5.49 – 5.40 (m, 2H), 3.79 (t, *J* = 6.4 Hz, 2H), 2.73 (dd, *J* = 8.7, 6.8 Hz, 2H), 2.33 (dddd, *J* = 8.9, 6.6, 4.2, 1.4 Hz, 2H), 2.14 – 2.04 (m, 2H), 1.65 – 1.54 (m, 2H), 1.03 (s, 18H).

<sup>13</sup>C NMR (101 MHz, CDCl<sub>3</sub>) δ 143.0, 132.0, 131.3, 130.6 (q, *J* = 31.9 Hz), 129.1, 128.7, 125.3 (q, *J* = 3.7 Hz), 123.1, (q, *J* = 273 Hz), 122.7 (q, *J* = 4.0 Hz), 62.9, 35.9, 34.2, 32.8, 28.9, 27.6, 20.6.

<sup>19</sup>F NMR (377 MHz, CDCl<sub>3</sub>) δ -63.2.

IR ν 3566, 2934, 2859, 1471, 1166, 1073, 827 cm<sup>-1</sup>.

HRMS (ESI-TOF) *m/z* = [M + Na<sup>+</sup>] Calcd C<sub>22</sub>H<sub>35</sub>F<sub>3</sub>O<sub>2</sub>SiNa<sup>+</sup> 439.2256, found 439.2274 (4.1 ppm error).

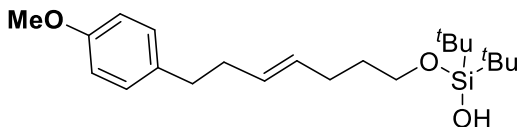

(*E*)-di-*tert*-butyl((7-(4-methoxyphenyl)hept-4-en-1-yl)oxy)silanol

**Compound S17:** Synthesized using General Procedure A on a 2.94 mmol scale; Purified using a gradient of 10-55% CH<sub>2</sub>Cl<sub>2</sub> in hexane on silica gel; (colorless oil, 870 mg, 2.30 mmol, 78% yield).

<sup>1</sup>H NMR (400 MHz, CDCl<sub>3</sub>) δ 7.12 – 7.06 (m, 2H), 6.85 – 6.79 (m, 2H), 5.54 – 5.36 (m, 2H), 3.80 – 3.74 (m, 5H), 2.61 (dd, *J* = 8.9, 6.7 Hz, 2H), 2.32 – 2.22 (m, 2H), 2.12 – 2.00 (m, 2H), 1.79 (s, 1H), 1.64 – 1.54 (m, 2H), 1.02 (s, 18H).

<sup>13</sup>C{<sup>1</sup>H} NMR (101 MHz, CDCl<sub>3</sub>) δ 157.8, 134.4, 130.6, 130.0, 129.5, 113.8, 63.0, 55.4, 35.3, 34.8, 32.9, 28.9, 27.6, 20.6.

IR v 3499, 2933, 2857, 1612, 1512, 1471, 1246, 1107, 827, 647 cm<sup>-1</sup>.

HRMS (ESI-TOF) *m/z* = [*M* + H<sup>+</sup>] Calcd C<sub>22</sub>H<sub>39</sub>O<sub>3</sub>Si<sup>+</sup> 379.2668, found 379.2669 (0.3 ppm error).

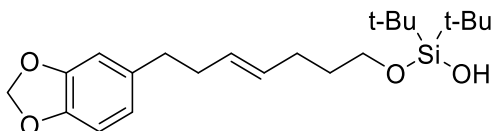

(*E*)-((7-(benzo[*d*][1,3]dioxol-5-yl)hept-4-en-1-yl)oxy)di-*tert*-butylsilanol

**Compound S19:** Synthesized using General Procedure A on a 2 mmol scale.; Purified using a gradient of 10-30% CH<sub>2</sub>Cl<sub>2</sub> in hexane on silica gel; (colorless oil, 471 mg, 1.20 mmol, 60% yield).

<sup>1</sup>H NMR (400 MHz, CDCl<sub>3</sub>) δ 6.73 (d, *J* = 7.9 Hz, 1H), 6.68 (d, *J* = 1.7 Hz, 1H), 6.62 (dd, *J* = 7.9, 1.7 Hz, 1H), 5.91 (s, 2H), 5.49 – 5.41 (m, 2H), 3.78 (t, *J* = 6.4 Hz, 2H), 2.59 (dd, *J* = 8.9, 6.7 Hz, 2H), 2.31 – 2.21 (m, 2H), 2.12 – 1.91 (m, 2H), 1.66 – 1.54 (m, 2H), 1.03 (s, 18H).

<sup>13</sup>C{<sup>1</sup>H} (101 MHz, CDCl<sub>3</sub>) δ 147.5, 145.6, 136.1, 130.7, 129.7, 121.3, 109.1, 108.2, 100.8, 62.9, 35.9, 34.8, 32.8, 28.9, 27.6, 20.6.

IR v 3607, 2934, 2860, 1505, 1488, 1246, 1040, 828 cm<sup>-1</sup>.

HRMS (ESI-TOF) *m/z* = [*M* + Na<sup>+</sup>] Calcd C<sub>22</sub>H<sub>36</sub>O<sub>4</sub>SiNa<sup>+</sup> 415.2281, found 415.2279 (0.5 ppm error).

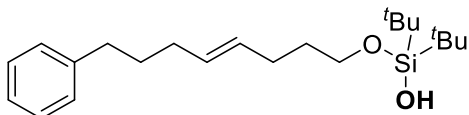

(*E*)-di-*tert*-butyl((8-phenyloct-4-en-1-yl)oxy)silanol

**Compound S21:** Synthesized using General Procedure A on a 2.0 mmol scale; Purified using a gradient of 10-30% CH<sub>2</sub>Cl<sub>2</sub> in hexane on silica gel; (colorless oil, 556 mg, 1.53 mmol, 77% yield).

$^1\text{H}$  NMR (400 MHz,  $\text{CDCl}_3$ )  $\delta$  7.30 – 7.25 (m, 2H), 7.21 – 7.14 (m, 3H), 5.51 – 5.35 (m, 2H), 3.80 (t,  $J$  = 6.4 Hz, 2H), 2.64 – 2.57 (m, 2H), 2.15 – 1.96 (m, 4H), 1.81 (s, 1H), 1.73 – 1.65 (m, 2H), 1.65 – 1.57 (m, 2H), 1.02 (s, 18H).

$^{13}\text{C}\{^1\text{H}\}$  NMR (101 MHz,  $\text{CDCl}_3$ )  $\delta$  142.8, 130.45, 130.40, 128.6, 128.4, 125.8, 63.0, 35.5, 32.9, 32.3, 31.4, 29.0, 27.6, 20.6.

IR  $\nu$  3500, 2931, 2859, 1604, 1495, 1471, 1107, 968, 828, 698, 647  $\text{cm}^{-1}$ .

HRMS (ESI-TOF)  $m/z$  =  $[\text{M} + \text{H}^+]$  Calcd  $\text{C}_{22}\text{H}_{39}\text{O}_2\text{Si}^+$  363.2719, found 363.2704 (4.1 ppm error)

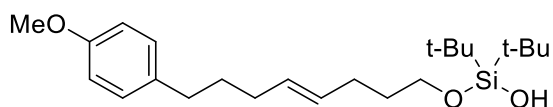

(*E*)-di-*tert*-butyl((8-(4-methoxyphenyl)oct-4-en-1-yl)oxy)silanol

**Compound S23:** Synthesized using General Procedure A on a 2 mmol scale; Purified using a gradient of 10-30%  $\text{CH}_2\text{Cl}_2$  in hexane on silica gel; (colorless oil, 549 mg, 1.40 mmol, 70% yield).

$^1\text{H}$  NMR (400 MHz,  $\text{CDCl}_3$ )  $\delta$  7.13 – 7.05 (m, 2H), 6.86 – 6.79 (m, 2H), 5.47 – 5.40 (m, 2H), 3.81 – 3.77 (m, 5H), 2.59 – 2.51 (m, 2H), 2.13 – 1.97 (m, 4H), 1.64 (tq,  $J$  = 14.9, 6.5 Hz, 4H), 1.02 (s, 18H).

$^{13}\text{C}\{^1\text{H}\}$  (101 MHz,  $\text{CDCl}_3$ )  $\delta$  157.8, 134.9, 130.5, 130.4, 129.4, 113.8, 63.0, 55.4, 34.6, 32.9, 32.2, 31.7, 29.0, 27.6, 20.6.

IR  $\nu$  2933, 2857, 1512, 1471, 1246, 1107, 828  $\text{cm}^{-1}$ .

HRMS (ESI-TOF)  $m/z$  =  $[\text{M} + \text{Na}^+]$  Calcd  $\text{C}_{23}\text{H}_{40}\text{O}_3\text{SiNa}^+$  415.2644, found 415.2634 (2.4 ppm error).

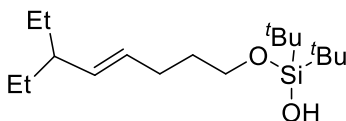

(*E*)-di-*tert*-butyl((6-ethyloct-4-en-1-yl)oxy)silanol

**Compound S25:** Synthesized using General Procedure A on a 2.0 mmol scale; Purified using a gradient of 10-30%  $\text{CH}_2\text{Cl}_2$  in hexane on silica gel; (colorless oil, 388 mg, 1.23 mmol, 62% yield).

$^1\text{H}$  NMR (400 MHz,  $\text{CDCl}_3$ )  $\delta$  5.35 (dt,  $J$  = 15.3, 6.7 Hz, 1H), 5.11 (ddt,  $J$  = 15.2, 8.7, 1.4 Hz, 1H), 3.80 (t,  $J$  = 6.5 Hz, 2H), 2.14 – 2.03 (m, 2H), 1.82 (s, 1H), 1.70 (dp,  $J$  = 13.1, 4.5 Hz, 1H), 1.65 – 1.57 (m, 2H), 1.44 – 1.31 (m, 2H), 1.26 – 1.13 (m, 2H), 1.02 (s, 18H), 0.82 (t,  $J$  = 7.4 Hz, 6H).

$^{13}\text{C}\{^1\text{H}\}$  NMR (101 MHz,  $\text{CDCl}_3$ )  $\delta$  135.1, 129.9, 63.0, 46.5, 33.1, 29.0, 27.9, 27.6, 20.6, 11.9.

IR  $\nu$  3506, 2963, 2933, 2859, 1471, 1107, 969, 828, 647  $\text{cm}^{-1}$ .

HRMS (ESI-TOF)  $m/z$  =  $[\text{M} + \text{Na}^+]$  Calcd  $\text{C}_{18}\text{H}_{38}\text{O}_2\text{SiNa}^+$  337.2539, found 337.2561 (6.5 ppm error).



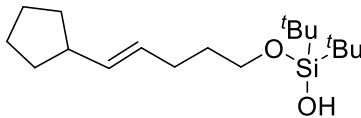

(*E*)-di-*tert*-butyl((5-cyclopentylpent-4-en-1-yl)oxy)silanol

**Compound S27:** Synthesized using General Procedure A on a 2.0 mmol scale; Purified using a gradient of 10-30% CH<sub>2</sub>Cl<sub>2</sub> in hexane on silica gel; (colorless oil, 398 mg, 1.27 mmol, 64% yield).

<sup>1</sup>H NMR (400 MHz, CDCl<sub>3</sub>) δ 5.47 – 5.32 (m, 2H), 3.78 (t, *J* = 6.4 Hz, 2H), 2.44 – 2.30 (m, 1H), 2.12 – 2.00 (m, 2H), 1.87 (s, 1H), 1.78 – 1.69 (m, 2H), 1.65 – 1.47 (m, 6H), 1.31 – 1.19 (m, 2H), 1.01 (s, 18H).

<sup>13</sup>C{<sup>1</sup>H} NMR (101 MHz, CDCl<sub>3</sub>) δ 135.7, 127.9, 63.0, 43.5, 33.4, 32.9, 28.9, 27.6, 25.3, 20.6.

IR ν 3499, 2934, 2859, 1471, 1109, 965, 828, 647 cm<sup>-1</sup>.

HRMS (ESI-TOF) *m/z* = [M + H<sup>+</sup>] Calcd C<sub>18</sub>H<sub>37</sub>O<sub>2</sub>Si<sup>+</sup> 313.2563, found 313.2559 (1.3 ppm error).

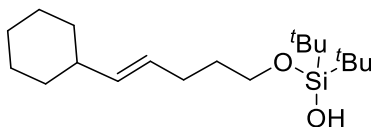

(*E*)-di-*tert*-butyl((5-cyclohexylpent-4-en-1-yl)oxy)silanol

**Compound S29:** Synthesized using General Procedure A on a 2.0 mmol scale; Purified using a gradient of 10-30% CH<sub>2</sub>Cl<sub>2</sub> in hexane on silica gel; (colorless oil, 435 mg, 1.33 mmol, 67% yield).

<sup>1</sup>H NMR (400 MHz, CDCl<sub>3</sub>) δ 5.43 – 5.28 (m, 2H), 3.78 (t, *J* = 6.4 Hz, 2H), 2.10 – 2.00 (m, 2H), 1.95 – 1.79 (m, 2H), 1.75 – 1.55 (m, 7H), 1.32 – 1.03 (m, 5H), 1.01 (s, 18H).

<sup>13</sup>C{<sup>1</sup>H} NMR (101 MHz, CDCl<sub>3</sub>) δ 137.1, 127.2, 62.9, 40.9, 33.4, 32.9, 29.0, 27.6, 26.4, 26.3, 20.6.

IR ν 3499, 2930, 2856, 1471, 1107, 827, 645 cm<sup>-1</sup>.

HRMS (ESI-TOF) *m/z* = [M + Na<sup>+</sup>] Calcd C<sub>19</sub>H<sub>38</sub>O<sub>2</sub>SiNa<sup>+</sup> 349.2539, found 349.2561 (6.3 ppm error).

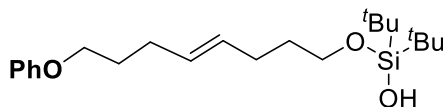

(*E*)-di-*tert*-butyl((8-phenoxyoct-4-en-1-yl)oxy)silanol

**Compound S31:** Synthesized using General Procedure A on a 1.9 mmol scale; Purified using a gradient of 30-100% CH<sub>2</sub>Cl<sub>2</sub> in hexane on silica gel; (colorless oil, 371 mg, 0.98 mmol, 52% yield).

$^1\text{H}$  NMR (400 MHz,  $\text{CDCl}_3$ )  $\delta$  7.31 – 7.25 (m, 2H), 6.96 – 6.87 (m, 3H), 5.54 – 5.40 (m, 2H), 3.96 (t,  $J = 6.5$  Hz, 2H), 3.79 (t,  $J = 6.4$  Hz, 2H), 2.23 – 2.13 (m, 2H), 2.14 – 2.05 (m, 2H), 1.91 – 1.80 (m, 3H), 1.64 – 1.56 (m, 2H), 1.02 (s, 18H).

$^{13}\text{C}\{^1\text{H}\}$  NMR (101 MHz,  $\text{CDCl}_3$ )  $\delta$  159.2, 130.9, 129.6, 129.5, 120.6, 114.7, 67.3, 62.9, 32.9, 29.3, 29.1, 28.9, 27.6, 20.6.

IR  $\nu$  3499, 2933, 2857, 1601, 1497, 1471, 1246, 1106, 827, 752, 691, 647  $\text{cm}^{-1}$ .

HRMS (ESI-TOF)  $m/z = [\text{M} + \text{Na}^+]$  Calcd  $\text{C}_{22}\text{H}_{38}\text{O}_3\text{SiNa}^+$  401.2488, found 401.2493 (1.2 ppm error).

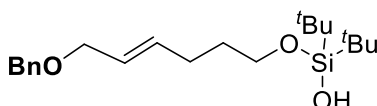

(*E*)-((6-(benzyloxy)hex-4-en-1-yl)oxy)di-*tert*-butylsilanol

**Compound S33:** Synthesized using General Procedure A on a 2.0 mmol scale; Purified using a gradient of 30-100%  $\text{CH}_2\text{Cl}_2$  in hexane on silica gel; (colorless oil, 583 mg, 1.6 mmol, 80% yield).

$^1\text{H}$  NMR (400 MHz,  $\text{CDCl}_3$ )  $\delta$  7.30 – 7.17 (m, 5H), 5.73 – 5.61 (m, 1H), 5.60 – 5.51 (m, 1H), 4.43 (s, 2H), 3.94 – 3.84 (m, 2H), 3.73 (t,  $J = 6.3$  Hz, 2H), 2.14 – 2.03 (m, 2H), 1.87 (s, 1H), 1.63 – 1.52 (m, 2H), 0.94 (s, 18H).

$^{13}\text{C}\{^1\text{H}\}$  NMR (101 MHz,  $\text{CDCl}_3$ )  $\delta$  138.5, 134.6, 128.5, 127.9, 127.7, 126.7, 72.1, 71.0, 62.8, 32.3, 28.8, 27.6, 20.6.

IR  $\nu$  3450, 2931, 2857, 1471, 1363, 1107, 969, 827, 738, 697, 647  $\text{cm}^{-1}$ .

HRMS (ESI-TOF)  $m/z = [\text{M} + \text{Na}^+]$  Calcd  $\text{C}_{21}\text{H}_{36}\text{O}_3\text{SiNa}^+$  387.2331, found 387.2340 (2.3 ppm error).

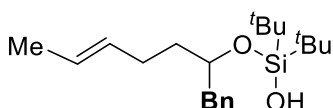

(*E*)-di-*tert*-butyl((1-phenylhept-5-en-2-yl)oxy)silanol

**Compound S35:** Synthesized using General Procedure A on a 4.9 mmol scale (Note modification of the procedure outlined in *Org. Lett.* **2022**, *24*, 6202–6207:  $(\text{t-Bu})_2\text{Si}(\text{OTf})_2/2,6$ -lutidine, reaction time 18 h, reaction temperature 0  $^\circ\text{C}$  to 23  $^\circ\text{C}$ ); Purified using a gradient of 10-30%  $\text{CH}_2\text{Cl}_2$  in hexane on silica gel; (colorless oil, 1.29 g, 3.70 mmol, 75% yield).

$^1\text{H}$  NMR (400 MHz,  $\text{CDCl}_3$ )  $\delta$  7.32 – 7.25 (m, 2H), 7.24 – 7.18 (m, 3H), 5.50 – 5.34 (m, 2H), 4.29 – 4.19 (m, 1H), 2.86 – 2.75 (m, 2H), 2.20 – 2.04 (m, 2H), 1.67 – 1.54 (m, 5H), 1.32 (s, 1H), 1.00 (s, 9H), 0.94 (s, 9H).

$^{13}\text{C}\{^1\text{H}\}$  NMR (101 MHz,  $\text{CDCl}_3$ )  $\delta$  139.6, 131.3, 129.8, 128.4, 126.4, 125.1, 74.1, 43.6, 36.9, 28.2, 27.9, 27.8, 20.7, 20.6, 18.1.

IR  $\nu$  3644, 2931, 2859, 1497, 1471, 1454, 1364, 1012, 965, 827, 750, 645  $\text{cm}^{-1}$ .

HRMS (ESI-TOF)  $m/z = [M + \text{Na}^+]$  Calcd  $\text{C}_{21}\text{H}_{36}\text{O}_2\text{SiNa}^+$  371.2382, found 371.2409 (7.3 ppm error).

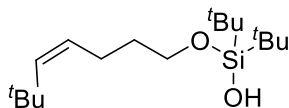

(Z)-di-*tert*-butyl((6,6-dimethylhept-4-en-1-yl)oxy)silanol

**Compound S39:** Synthesized using General Procedure A on a 2.69 mmol scale; Purified using a gradient of 10-30%  $\text{CH}_2\text{Cl}_2$  in hexane on silica gel; (colorless oil, 494 mg, 1.64 mmol, 61% yield).

$^1\text{H}$  NMR (400 MHz,  $\text{CDCl}_3$ )  $\delta$  5.33 (dt,  $J = 11.9, 1.7$  Hz, 1H), 5.16 (dt,  $J = 11.9, 7.4$  Hz, 1H), 3.81 (t,  $J = 6.4$  Hz, 2H), 2.26 (qd,  $J = 7.5, 1.7$  Hz, 2H), 1.83 (s, 1H), 1.65 – 1.55 (m, 2H), 1.11 (s, 9H), 1.02 (s, 18H).

$^{13}\text{C}\{^1\text{H}\}$  NMR (101 MHz,  $\text{CDCl}_3$ )  $\delta$  140.3, 128.5, 63.2, 33.7, 33.3, 31.3, 27.6, 24.9, 20.6.

IR  $\nu$  3499, 2960, 2934, 2860, 1473, 1363, 1109, 827, 750, 647  $\text{cm}^{-1}$ .

HRMS (ESI-TOF)  $m/z = [M + \text{H}^+]$  Calcd  $\text{C}_{17}\text{H}_{37}\text{O}_2\text{Si}^+$  301.2563, found 301.2566 (1.0 ppm error).

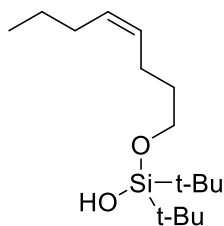

(Z)-di-*tert*-butyl(oct-4-en-1-yloxy)silanol

**Compound S41:** Synthesized using General Procedure A on a 2 mmol scale; Purified using a gradient of 10-30%  $\text{CH}_2\text{Cl}_2$  in hexane on silica gel; (colorless oil, 430 mg, 1.50 mmol, 75% yield).

$^1\text{H}$  NMR (400 MHz,  $\text{CDCl}_3$ )  $\delta$  5.47 – 5.35 (m, 2H), 3.83 (t,  $J = 6.4$  Hz, 2H), 2.20 – 2.10 (m, 2H), 2.10 – 2.00 (m, 2H), 1.68 – 1.56 (m, 2H), 1.39 (h,  $J = 7.3$  Hz, 2H), 1.05 (s, 18H), 0.92 (t,  $J = 7.4$  Hz, 3H).

$^{13}\text{C}\{^1\text{H}\}$  (101 MHz,  $\text{CDCl}_3$ )  $\delta$  130.3, 129.5, 63.1, 33.2, 29.4, 27.6, 23.7, 23.0, 20.6, 13.9.

IR  $\nu$  3649, 2933, 2860, 1558, 1473, 1106, 827  $\text{cm}^{-1}$ .

HRMS (ESI-TOF)  $m/z = [M + \text{Na}^+]$  Calcd  $\text{C}_{16}\text{H}_{34}\text{O}_2\text{SiNa}^+$  309.2226, found 309.2213 (4.2 ppm error).

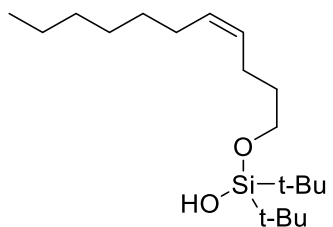

(Z)-di-*tert*-butyl(undec-4-en-1-yloxy)silanol

**Compound S43:** Synthesized using General Procedure A on a 2 mmol scale; Purified using a gradient of 10-30% CH<sub>2</sub>Cl<sub>2</sub> in hexane on silica gel; (colorless oil, 519 mg, 1.58 mmol, 79% yield).

<sup>1</sup>H NMR (400 MHz, CDCl<sub>3</sub>) δ 5.44 – 5.32 (m, 2H), 3.80 (t, J = 6.4 Hz, 2H), 2.07 (t, 2H), 2.07 – 1.98 (m, 2H), 1.65 – 1.51 (m, 2H), 1.38 – 1.22 (m, 8H), 1.02 (s, 18H), 0.92 – 0.84 (m, 3H).

<sup>13</sup>C{<sup>1</sup>H} (101 MHz, CDCl<sub>3</sub>) δ 130.6, 129.3, 63.1, 33.2, 31.9, 29.9, 29.2, 27.6, 27.4, 23.7, 22.8, 20.6, 14.2.

IR ν 3566, 2930, 2859, 1588, 1471, 1106, 828 cm<sup>-1</sup>.

HRMS (ESI-TOF) m/z = [M + Na<sup>+</sup>] C<sub>19</sub>H<sub>40</sub>O<sub>2</sub>SiNa<sup>+</sup> 351.2695, found 351.2710 (4.3 ppm error).

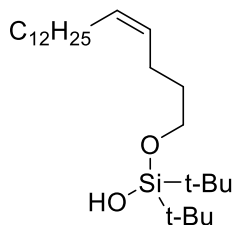

(Z)-di-*tert*-butyl(heptadec-4-en-1-yloxy)silanol

**Compound S45:** Synthesized using General Procedure A on a 2 mmol scale.; Purified using a gradient of 10-30% CH<sub>2</sub>Cl<sub>2</sub> in hexane on silica gel; (colorless oil, 563 mg, 1.36 mmol, 68% yield).

<sup>1</sup>H NMR (400 MHz, CDCl<sub>3</sub>) δ 5.47 – 5.34 (m, 2H), 3.83 (t, J = 6.4 Hz, 2H), 2.15 (td, J = 7.7, 6.0 Hz, 2H), 2.10 – 2.02 (m, 2H), 1.68 – 1.57 (m, 2H), 1.29 (s, 20H), 1.05 (s, 18H), 0.91 (t, J = 6.8 Hz, 3H).

<sup>13</sup>C{<sup>1</sup>H} (101 MHz, CDCl<sub>3</sub>) δ 130.6, 129.3, 63.1, 33.2, 32.1, 29.9, 29.8 (2C), 29.7, 29.5, 27.6, 27.4, 23.7, 22.9, 20.6, 14.3.

IR ν 3566, 2933, 2856, 1558, 1471, 1106, 828 cm<sup>-1</sup>.

HRMS (ESI-TOF) m/z = [M + Na<sup>+</sup>] C<sub>25</sub>H<sub>52</sub>O<sub>2</sub>SiNa<sup>+</sup> 435.3634, found 435.3642 (1.8 ppm error).

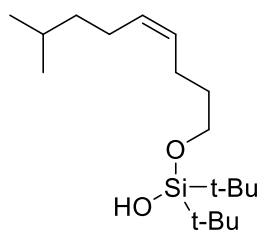

(Z)-di-*tert*-butyl((8-methylnon-4-en-1-yl)oxy)silanol

**Compound S47:** Synthesized using General Procedure A on a 2 mmol scale; Purified using a gradient of 10-30% CH<sub>2</sub>Cl<sub>2</sub> in hexane on silica gel; (colorless oil, 459 mg, 1.46 mmol, 73% yield).

<sup>1</sup>H NMR (400 MHz, CDCl<sub>3</sub>) δ 5.43 – 5.33 (m, 2H), 3.83 (t, J = 6.4 Hz, 2H), 2.19 – 2.12 (m, 2H), 2.10 – 1.99 (m, 2H), 1.68 – 1.51 (m, 3H), 1.31 – 1.20 (m, 2H), 1.05 (s, 18H), 0.91 (d, J = 6.6 Hz, 6H).

<sup>13</sup>C{<sup>1</sup>H} (101 MHz, CDCl<sub>3</sub>) δ 130.7, 129.1, 63.1, 39.1, 33.2, 27.8, 27.6, 25.3, 23.7, 22.7, 20.6.

IR v 3649, 2933, 1652, 1507, 1473, 1107, 828 cm<sup>-1</sup>.

HRMS (ESI-TOF) m/z = [M + Na<sup>+</sup>] C<sub>18</sub>H<sub>38</sub>O<sub>2</sub>SiNa<sup>+</sup> 337.2539, found 337.2532 (2.1 ppm error).

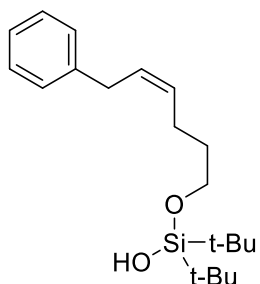

(Z)-di-*tert*-butyl((6-phenylhex-4-en-1-yl)oxy)silanol

**Compound S49:** Synthesized using General Procedure A on a 2 mmol scale; Purified using a gradient of 10-30% CH<sub>2</sub>Cl<sub>2</sub> in hexane on silica gel; (colorless oil, 401 mg, 1.20 mmol, 60% yield).

<sup>1</sup>H NMR (400 MHz, CDCl<sub>3</sub>) δ 7.29 (s, 2H), 7.29 – 7.20 (m, 3H), 5.72 – 5.54 (m, 2H), 3.89 (q, J = 6.6 Hz, 2H), 3.48 (d, J = 6.8 Hz, 2H), 2.37 – 2.27 (m, 2H), 1.78 – 1.66 (m, 2H), 1.12 – 1.07 (m, 18H).

<sup>13</sup>C{<sup>1</sup>H} (101 MHz, CDCl<sub>3</sub>) δ 141.3, 130.4, 128.7, 128.52, 128.45, 125.9, 62.9, 33.6, 33.0, 27.6, 23.7, 20.6.

IR v 3647, 2931, 1652, 1471, 1012, 828 cm<sup>-1</sup>.

HRMS (ESI-TOF) m/z = [M + Na<sup>+</sup>] C<sub>20</sub>H<sub>34</sub>O<sub>2</sub>SiNa<sup>+</sup> 357.2226, found 357.2242 (4.5 ppm error).

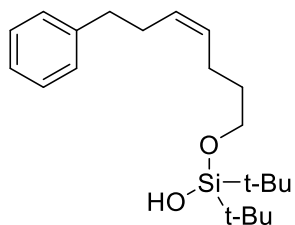

(Z)-di-*tert*-butyl((7-phenylhept-4-en-1-yl)oxy)silanol

**Compound S51:** Synthesized using General Procedure A on a 2 mmol scale; Purified using a gradient of 10-30% CH<sub>2</sub>Cl<sub>2</sub> in hexane on silica gel; (colorless oil, 513 mg, 1.47 mmol, 73% yield).

<sup>1</sup>H NMR (400 MHz, CDCl<sub>3</sub>) δ 7.38 – 7.29 (m, 2H), 7.28 – 7.22 (m, 3H), 5.57 – 5.41 (m, 2H), 3.83 (t, J = 6.4 Hz, 2H), 2.72 (dd, J = 8.7, 6.9 Hz, 2H), 2.48 – 2.36 (m, 2H), 2.14 (ddd, J = 8.2, 6.4, 4.7 Hz, 2H), 1.60 (dq, J = 8.2, 6.5 Hz, 2H), 1.08 (s, 18H).

<sup>13</sup>C{<sup>1</sup>H} (101 MHz, CDCl<sub>3</sub>) δ 142.2, 130.2, 129.3, 128.6, 128.4, 125.9, 63.0, 36.1, 33.0, 29.3, 27.6, 23.7, 20.6.

IR ν 3566, 2931, 1471, 1455, 1075, 827 cm<sup>-1</sup>.

HRMS (ESI-TOF) m/z = [M + Na<sup>+</sup>] Calcd C<sub>21</sub>H<sub>36</sub>O<sub>2</sub>SiNa<sup>+</sup> 371.2382, found 371.2369 (3.5 ppm error).

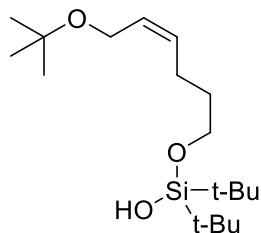

(Z)-((6-(*tert*-butoxy)hex-4-en-1-yl)oxy)di-*tert*-butylsilanol

**Compound S53:** Synthesized using General Procedure A on a 2 mmol scale; Purified using a gradient of 10-30% CH<sub>2</sub>Cl<sub>2</sub> in hexane on silica gel; (colorless oil, 397 mg, 1.20 mmol, 60% yield).

<sup>1</sup>H NMR (400 MHz, CDCl<sub>3</sub>) δ 5.60 – 5.43 (m, 2H), 4.00 – 3.93 (m, 2H), 3.80 (t, J = 6.1 Hz, 2H), 2.18 (dt, J = 7.4, 6.2 Hz, 2H), 1.62 (tt, J = 7.3, 6.0 Hz, 2H), 1.23 (s, 9H), 1.02 (s, 18H).

<sup>13</sup>C{<sup>1</sup>H} (101 MHz, CDCl<sub>3</sub>) δ 132.0, 128.1, 73.4, 62.4, 57.7, 32.6, 27.69, 27.65, 23.8, 20.5.

IR ν 3566, 2968, 2857, 1558, 1471, 1106, 828 cm<sup>-1</sup>.

HRMS (ESI-TOF) m/z = [M + Na<sup>+</sup>] C<sub>18</sub>H<sub>38</sub>O<sub>3</sub>SiNa<sup>+</sup> 353.2488, found 353.2495 (2 ppm error).

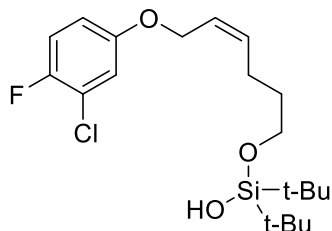

(Z)-di-*tert*-butyl((6-(3-chloro-4-fluorophenoxy)hex-4-en-1-yl)oxy)silanol

**Compound S55:** Synthesized using General Procedure A on a 2 mmol scale; Purified using a gradient of 10-30% CH<sub>2</sub>Cl<sub>2</sub> in hexane on silica gel; (colorless oil, 564 mg, 1.40 mmol, 70% yield).

<sup>1</sup>H NMR (400 MHz, CDCl<sub>3</sub>) δ 7.02 (td, J = 8.9, 1.0 Hz, 1H), 6.92 (dd, J = 6.0, 3.0 Hz, 1H), 6.75 (dt, J = 9.1, 3.4 Hz, 1H), 5.76 – 5.61 (m, 2H), 4.54 (d, J = 5.2 Hz, 2H), 3.82 (t, J = 6.1 Hz, 2H), 2.30 – 2.18 (m, 2H), 1.65 (tt, J = 7.4, 6.1 Hz, 2H), 1.01 (s, 18H).

<sup>13</sup>C{<sup>1</sup>H} (101 MHz, CDCl<sub>3</sub>) δ 155.0 (d, J = 2.3 Hz), 152.9 (d, J = 241.3 Hz), 134.6, 124.6, 121.1 (d, J = 19.1 Hz), 116.8 (d, J = 22.7 Hz), 116.5, 114.6 (d, J = 6.7 Hz), 64.9, 62.5, 32.6, 27.6, 24.2, 20.6.

<sup>19</sup>F NMR (377 MHz, CDCl<sub>3</sub>) δ -127.1 (tt, J = 10.0, 5.4 Hz).

IR ν 3566, 2933, 2859, 1558, 1497, 1106, 827 cm<sup>-1</sup>.

HRMS (ESI-TOF) m/z = [M + Na<sup>+</sup>] Calcd C<sub>20</sub>H<sub>32</sub>FCIO<sub>3</sub>SiNa<sup>+</sup> 425.1691, found 425.1693 (0.5 ppm error).

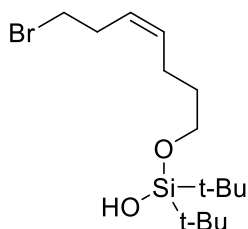

(Z)-((7-bromohept-4-en-1-yl)oxy)di-*tert*-butylsilanol

**Compound S57:** Synthesized using General Procedure A on a 2 mmol scale; Purified using a gradient of 10-30% CH<sub>2</sub>Cl<sub>2</sub> in hexane on silica gel; (colorless oil, 491 mg, 1.40 mmol, 70% yield).

<sup>1</sup>H NMR (400 MHz, CDCl<sub>3</sub>) δ 5.67 – 5.46 (m, 1H), 5.50 – 5.28 (m, 1H), 3.83 (t, J = 6.3 Hz, 2H), 3.39 (t, J = 7.1 Hz, 2H), 2.66 (qd, J = 7.2, 1.5 Hz, 2H), 2.18 (qd, J = 7.4, 1.6 Hz, 2H), 1.64 (tt, J = 7.3, 6.3 Hz, 2H), 1.05 (s, 18H).

<sup>13</sup>C{<sup>1</sup>H} (101 MHz, CDCl<sub>3</sub>) δ 132.5, 126.4, 62.7, 32.8, 32.6, 30.9, 27.6, 23.8, 20.6.

IR ν 3566, 2933, 1558, 1471, 1107, 827 cm<sup>-1</sup>.

HRMS (ESI-TOF) m/z = [M + Na<sup>+</sup>] Calcd C<sub>15</sub>H<sub>31</sub>BrO<sub>2</sub>SiNa<sup>+</sup> 373.1174, found 373.1189 (4.0 ppm error).

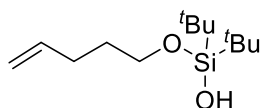

di-*tert*-butyl(pent-4-en-1-yloxy)silanol

**Compound S59:** Synthesized using General Procedure A on a 4.0 mmol scale; Purified using a gradient of 10-30% CH<sub>2</sub>Cl<sub>2</sub> in hexane on silica gel; (colorless oil, 655.0 mg, 2.68 mmol, 67% yield).

<sup>1</sup>H NMR (400 MHz, CDCl<sub>3</sub>) δ 5.84 (ddt, *J* = 16.9, 10.1, 6.7 Hz, 1H), 5.08 – 4.92 (m, 2H), 3.80 (t, *J* = 6.4 Hz, 2H), 2.19 – 2.09 (m, 2H), 1.82 (s, 1H), 1.69 – 1.59 (m, 2H), 1.02 (s, 18H).

<sup>13</sup>C{<sup>1</sup>H} NMR (101 MHz, CDCl<sub>3</sub>) δ 138.8, 114.7, 62.9, 32.2, 30.2, 27.6, 20.6.

IR ν 3512, 2933, 2859, 1641, 1471, 1105, 827, 645 cm<sup>-1</sup>.

HRMS (ESI-TOF) *m/z* = [M + H<sup>+</sup>] Calcd C<sub>13</sub>H<sub>29</sub>O<sub>2</sub>Si<sup>+</sup> 245.1937, found 245.1937 (0.0 ppm error).

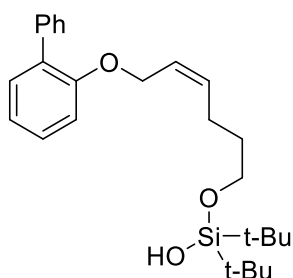

(*Z*)-((6-([1,1'-biphenyl]-2-yloxy)hex-4-en-1-yl)oxy)di-*tert*-butylsilanol

**Compound S61:** Synthesized using General Procedure A on a 2 mmol scale; Purified using a gradient of 10-30% CH<sub>2</sub>Cl<sub>2</sub> in hexane on silica gel; (colorless oil, 597 mg, 1.40 mmol, 70% yield).

<sup>1</sup>H NMR (400 MHz, CDCl<sub>3</sub>) δ 7.63 – 7.55 (m, 2H), 7.48 – 7.27 (m, 5H), 7.11 – 6.98 (m, 2H), 5.73 – 5.57 (m, 2H), 4.64 (d, *J* = 5.2 Hz, 2H), 3.82 (td, *J* = 6.3, 4.3 Hz, 2H), 2.27 – 2.12 (m, 2H), 1.71 – 1.59 (m, 2H), 1.05 (s, 18H).

<sup>13</sup>C{<sup>1</sup>H} NMR (101 MHz, CDCl<sub>3</sub>) δ 155.7, 138.7, 133.1, 131.3, 131.1, 129.7, 128.5, 128.0, 126.9, 125.7, 121.2, 113.3, 64.8, 62.6, 32.6, 27.6, 24.2, 20.5.

IR ν 3647, 2931, 2857, 1558, 1471, 1106, 828 cm<sup>-1</sup>.

HRMS (ESI-TOF) *m/z* = [M + Na<sup>+</sup>] Calcd C<sub>26</sub>H<sub>38</sub>O<sub>3</sub>SiNa<sup>+</sup> 449.2488, found 449.2507 (4.2 ppm error).

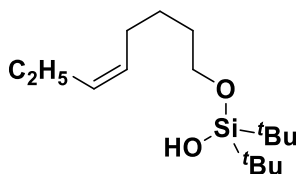

(*Z*)-di-*tert*-butyl(oct-5-en-1-yloxy)silanol



**Compound S63:** Synthesized using General Procedure A on a 5.0 mmol scale; Purified using a gradient of 10-30% CH<sub>2</sub>Cl<sub>2</sub> in hexane on silica gel; (colorless oil, 1.25 g, 4.36 mmol, 87% yield).

<sup>1</sup>H NMR (400 MHz, CDCl<sub>3</sub>) δ 5.44 – 5.26 (m, 2H), 3.79 (t, *J* = 6.4 Hz, 2H), 2.10 – 1.96 (m, 4H), 1.80 (s, 1H), 1.60 – 1.51 (m, 2H), 1.46 – 1.37 (m, 2H), 1.01 (s, 18H), 0.95 (t, *J* = 7.5 Hz, 3H).

<sup>13</sup>C{<sup>1</sup>H} NMR (101 MHz, CDCl<sub>3</sub>) δ 131.9, 129.2, 63.5, 32.7, 27.6, 27.0, 26.1, 20.7, 20.6, 14.5.

IR ν 3510, 2933, 2859, 1471, 1107, 828, 750, 647 cm<sup>-1</sup>.

HRMS (ESI-TOF) *m/z* = [M + H<sup>+</sup>] Calcd C<sub>16</sub>H<sub>35</sub>O<sub>2</sub>Si<sup>+</sup> 287.2406, found 287.2420 (4.9 ppm error).

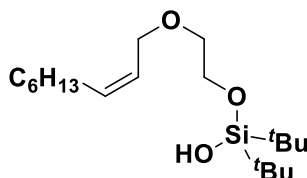

(*Z*)-di-*tert*-butyl(2-(non-2-en-1-yloxy)ethoxy)silanol

**Compound S65:** Synthesized using General Procedure A on a 4.0 mmol scale; Purified using a gradient of 30-100% CH<sub>2</sub>Cl<sub>2</sub> in hexane on silica gel; (colorless oil, 965 mg, 2.8 mmol, 70% yield).

<sup>1</sup>H NMR (400 MHz, CDCl<sub>3</sub>) δ 5.65 – 5.56 (m, 1H), 5.56 – 5.47 (m, 1H), 4.05 (dd, *J* = 6.4, 1.2 Hz, 2H), 4.00 – 3.94 (m, 2H), 3.54 – 3.48 (m, 2H), 2.09 – 1.98 (m, 2H), 1.39 – 1.23 (m, 8H), 1.01 (s, 18H), 0.91 – 0.85 (m, 3H).

<sup>13</sup>C{<sup>1</sup>H} NMR (101 MHz, CDCl<sub>3</sub>) δ 134.7, 125.0, 72.5, 67.0, 63.3, 31.8, 29.6, 29.0, 27.7, 27.5, 22.8, 20.7, 14.2.

IR ν 3469, 2931, 2857, 1473, 1136, 1097, 869, 828, 750, 648 cm<sup>-1</sup>.

HRMS (ESI-TOF) *m/z* = [M + Na<sup>+</sup>] Calcd C<sub>19</sub>H<sub>40</sub>O<sub>3</sub>SiNa<sup>+</sup> 367.2644, found 367.2645 (0.3 ppm error).

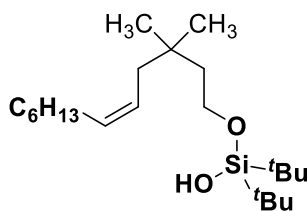

(*Z*)-di-*tert*-butyl((3,3-dimethyldodec-5-en-1-yl)oxy)silanol

**Compound S67:** Synthesized using General Procedure A on a 2.0 mmol scale; Purified using a gradient of 10-30% CH<sub>2</sub>Cl<sub>2</sub> in hexane on silica gel; (colorless oil, 618 mg, 1.67 mmol, 83% yield).

<sup>1</sup>H NMR (400 MHz, CDCl<sub>3</sub>) δ 5.51 – 5.35 (m, 2H), 3.89 – 3.81 (m, 2H), 2.06 – 1.97 (m, 2H), 1.95 (d, *J* = 6.5 Hz, 2H), 1.78 (s, 1H), 1.56 – 1.47 (m, 2H), 1.37 – 1.23 (m, 8H), 1.01 (s, 18H), 0.91 – 0.85 (m, 9H).

<sup>13</sup>C{<sup>1</sup>H} NMR (101 MHz, CDCl<sub>3</sub>) δ 131.9, 126.0, 60.6, 44.5, 39.9, 33.1, 32.0, 29.8, 29.2, 27.6, 27.5, 27.4, 22.8, 20.6, 14.3.

IR ν 3506, 2928, 2857, 1470, 1364, 1097, 828, 647 cm<sup>-1</sup>.

HRMS (ESI-TOF) *m/z* = [*M* + H<sup>+</sup>] Calcd C<sub>22</sub>H<sub>47</sub>O<sub>2</sub>Si<sup>+</sup> 371.3345, found 371.3356 (3.0 ppm error).

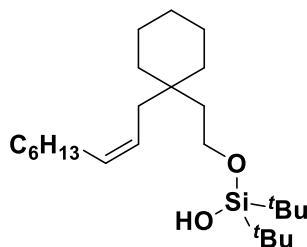

(*Z*)-di-*tert*-butyl(2-(1-(non-2-en-1-yl)cyclohexyl)ethoxy)silanol

**Compound S69:** Synthesized using General Procedure A on a 4.0 mmol scale; Purified using a gradient of 10-30% CH<sub>2</sub>Cl<sub>2</sub> in hexane on silica gel; (colorless oil, 1.20 g, 2.93 mmol, 73% yield).

<sup>1</sup>H NMR (400 MHz, CDCl<sub>3</sub>) δ 5.54 – 5.32 (m, 2H), 3.89 – 3.75 (m, 2H), 2.08 – 1.97 (m, 4H), 1.75 (s, 1H), 1.61 – 1.53 (m, 2H), 1.48 – 1.39 (m, 5H), 1.38 – 1.24 (m, 13H), 1.01 (s, 18H), 0.92 – 0.86 (m, 3H).

<sup>13</sup>C{<sup>1</sup>H} NMR (101 MHz, CDCl<sub>3</sub>) δ 131.9, 125.6, 59.9, 39.8, 36.1, 35.4, 35.3, 31.9, 29.9, 29.2, 27.7, 27.6, 26.6, 22.8, 21.9, 20.6, 14.3.

IR ν 2928, 2857, 1471, 1095, 827, 647 cm<sup>-1</sup>.

HRMS (ESI-TOF) *m/z* = [*M* + Na<sup>+</sup>] Calcd C<sub>25</sub>H<sub>50</sub>O<sub>2</sub>SiNa<sup>+</sup> 433.3478, found 433.3484 (1.4 ppm error).

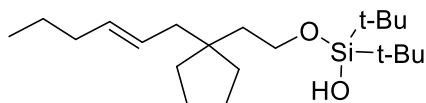

(*E*)-di-*tert*-butyl(2-(1-(hex-2-en-1-yl)cyclopentyl)ethoxy)silanol

**Compound S71:** Synthesized using General Procedure A on a 2 mmol scale; Purified using a gradient of 10-30% CH<sub>2</sub>Cl<sub>2</sub> in hexane on silica gel; (colorless oil, 425 mg, 1.20 mmol, 60% yield).

<sup>1</sup>H NMR (400 MHz, CDCl<sub>3</sub>) δ 5.44 – 5.34 (m, 2H), 3.87 – 3.79 (m, 2H), 2.02 – 1.92 (m, 4H), 1.65 – 1.51 (m, 6H), 1.48 – 1.30 (m, 6H), 1.01 (s, 18H), 0.89 (t, *J* = 7.4 Hz, 3H).

$^{13}\text{C}\{^1\text{H}\}$  (101 MHz,  $\text{CDCl}_3$ )  $\delta$  132.7, 127.6, 60.9, 44.2, 41.9, 41.8, 37.6, 34.9, 27.6, 24.6, 22.8, 20.5, 13.8.

IR  $\nu$  3446, 2933, 1558, 1507, 1471, 1106, 828  $\text{cm}^{-1}$ .

HRMS (ESI-TOF)  $m/z = [\text{M} + \text{Na}^+]$  Calcd  $\text{C}_{21}\text{H}_{42}\text{O}_2\text{SiNa}^+$  377.2852, found 377.2863 (2.9 ppm error).

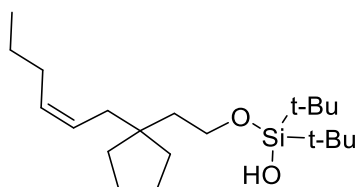

(*Z*)-di-*tert*-butyl(2-(1-(hex-2-en-1-yl)cyclopentyl)ethoxy)silanol

**Compound S73:** Synthesized using General Procedure A on a 2 mmol scale.; Purified using a gradient of 10-30%  $\text{CH}_2\text{Cl}_2$  in hexane on silica gel; (colorless oil, 461 mg, 1.30 mmol, 65% yield).

$^1\text{H}$  NMR (400 MHz,  $\text{CDCl}_3$ )  $\delta$  5.54 – 5.39 (m, 2H), 3.90 – 3.81 (m, 2H), 2.03 (tq,  $J = 6.5, 2.3$  Hz, 4H), 1.69 – 1.56 (m, 6H), 1.49 – 1.36 (m, 6H), 1.04 (s, 18H), 0.93 (t,  $J = 7.4$  Hz, 3H).

$^{13}\text{C}\{^1\text{H}\}$  (101 MHz,  $\text{CDCl}_3$ )  $\delta$  131.4, 126.9, 61.1, 44.3, 41.9, 37.7, 35.9, 29.7, 27.6, 24.7, 23.0, 20.6, 14.0.

IR  $\nu$  3446, 2938, 1558, 1507, 1471, 1107, 828  $\text{cm}^{-1}$ .

HRMS (ESI-TOF)  $m/z = [\text{M} + \text{Na}^+]$  Calcd  $\text{C}_{21}\text{H}_{42}\text{O}_2\text{SiNa}^+$  377.2852, found 377.2867 (4.0 ppm error).

## V. Preparation of Silanol Epoxides

### General Procedure B

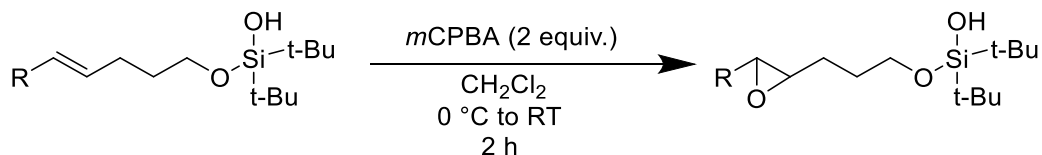

*m*-CPBA (2.0 equiv) was added to an ice-cold solution of alkenyl silanol substrate (1.0 equiv) in  $\text{CH}_2\text{Cl}_2$  (0.1 M concentration). The reaction mixture was allowed to warm to room temperature over a period of two hours. Next, the reaction was quenched with saturated aqueous  $\text{Na}_2\text{S}_2\text{O}_3$  solution and transferred to a separatory funnel. The aqueous layer was removed, and the organic layer was washed with one portion of 0.5 M aqueous NaOH solution. The organic layer was collected, dried with  $\text{Na}_2\text{SO}_4$ , and concentrated under reduced pressure. The resulting residue was purified by silica gel column chromatography (specific conditions are associated with each compound).

## VI. Characterization of Silanol Epoxides

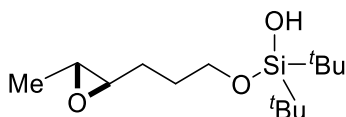

di-*tert*-butyl(3-((2*R*\*,3*R*\*)-3-methyloxiran-2-yl)propoxy)silanol

**Compound 1:** Synthesized using General Procedure B on a 3.87 mmol scale; Purified using a gradient of 0-3% acetone in CH<sub>2</sub>Cl<sub>2</sub> on silica gel; single diastereomer; (colorless oil, 1.03 g, 3.75 mmol, 97% yield).

<sup>1</sup>H NMR (400 MHz, CDCl<sub>3</sub>) δ 3.92 – 3.78 (m, 2H), 2.82 – 2.70 (m, 2H), 2.67 (ddd, *J* = 6.6, 3.9, 2.3 Hz, 1H), 1.79 – 1.62 (m, 3H), 1.62 – 1.49 (m, 1H), 1.29 (d, *J* = 5.2 Hz, 3H), 1.00 (s, 9H), 0.99 (s, 9H).

<sup>13</sup>C{<sup>1</sup>H} NMR (101 MHz, CDCl<sub>3</sub>) δ 62.6, 60.2, 54.6, 29.8, 28.2, 27.7, 27.6, 20.8, 20.6, 17.7.

IR ν 3437, 2933, 2860, 1473, 1130, 650 cm<sup>-1</sup>.

HRMS (ESI) *m/z* = [*M* + Na<sup>+</sup>] calculated for C<sub>14</sub>H<sub>30</sub>O<sub>3</sub>SiNa<sup>+</sup> 297.1862, Found 297.1871 (3.0 ppm error).

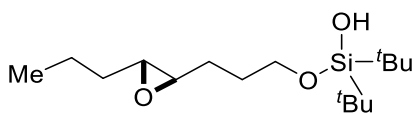

di-*tert*-butyl(3-((2*R*\*,3*R*\*)-3-propyloxiran-2-yl)propoxy)silanol

**Compound 3:** Synthesized using General Procedure B on a 1.1 mmol scale; Purified using a gradient of 0-3% acetone in CH<sub>2</sub>Cl<sub>2</sub> on silica gel; single diastereomer; (colorless oil, 312 mg, 1.03 mmol, 94% yield).

<sup>1</sup>H NMR (400 MHz, CDCl<sub>3</sub>) δ 3.94 – 3.78 (m, 2H), 2.75 – 2.67 (m, 2H), 2.66 (s, 1H), 1.77 – 1.65 (m, 3H), 1.61 – 1.38 (m, 5H), 1.01 (s, 9H), 1.00 (s, 9H), 0.95 (t, *J* = 7.1 Hz, 3H).

<sup>13</sup>C{<sup>1</sup>H} NMR (101 MHz, CDCl<sub>3</sub>) δ 62.6, 59.2, 58.6, 34.2, 29.8, 28.3, 27.7, 27.6, 20.8, 20.6, 19.4, 14.1.

IR ν 3442, 2961, 2933, 2859, 1473, 1106, 827, 647 cm<sup>-1</sup>.

HRMS (ESI) *m/z* = [*M* + Na<sup>+</sup>] calculated for C<sub>16</sub>H<sub>34</sub>O<sub>3</sub>SiNa<sup>+</sup> 325.2175, Found 325.2185 (3.1 ppm error).

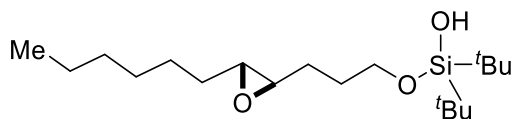

di-*tert*-butyl(3-((2*R*<sup>\*</sup>,3*R*<sup>\*</sup>)-3-hexyloxiran-2-yl)propoxy)silanol

**Compound 5:** Synthesized using General Procedure B on a 1.26 mmol scale; Purified using a gradient of 0-3% acetone in CH<sub>2</sub>Cl<sub>2</sub> on silica gel; single diastereomer; (colorless oil, 380 mg, 1.10 mmol, 87% yield).

<sup>1</sup>H NMR (400 MHz, CDCl<sub>3</sub>) δ 3.89 – 3.75 (m, 2H), 3.03 (s, 1H), 2.72 – 2.61 (m, 2H), 1.73 – 1.61 (m, 3H), 1.59 – 1.34 (m, 5H), 1.33 – 1.19 (m, 6H), 0.97 (s, 9H), 0.96 (s, 9H), 0.87 – 0.82 (m, 3H).

<sup>13</sup>C{<sup>1</sup>H} NMR (101 MHz, CDCl<sub>3</sub>) δ 62.6, 59.3, 58.8, 32.2, 31.9, 29.9, 29.3, 28.3, 27.7, 27.6, 26.1, 22.7, 20.8, 20.6, 14.2.

IR ν 3475, 2931, 2857, 1473, 1103, 827, 648 cm<sup>-1</sup>

HRMS (ESI) m/z = [M + H<sup>+</sup>] calculated for C<sub>19</sub>H<sub>41</sub>O<sub>3</sub>Si<sup>+</sup> 345.2825, Found 345.2822 (error 0.9 ppm).

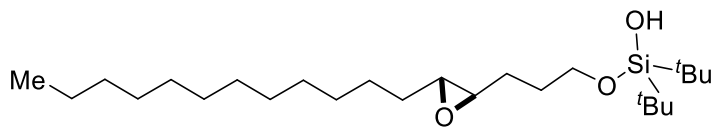

di-*tert*-butyl(3-((2*R*<sup>\*</sup>,3*R*<sup>\*</sup>)-3-dodecyloxiran-2-yl)propoxy)silanol

**Compound 7:** Synthesized using General Procedure B on a 0.75 mmol scale; Purified using a gradient of 0-3% acetone in CH<sub>2</sub>Cl<sub>2</sub> on silica gel; single diastereomer; (colorless oil, 288 mg, 0.672 mmol, 90% yield).

<sup>1</sup>H NMR (400 MHz, CDCl<sub>3</sub>) δ 3.94 – 3.77 (m, 2H), 2.75 – 2.54 (m, 3H), 1.77 – 1.64 (m, 3H), 1.61 – 1.47 (m, 3H), 1.47 – 1.36 (m, 2H), 1.34 – 1.19 (m, 18H), 1.01 (s, 9H), 1.00 (s, 9H), 0.87 (t, *J* = 6.8 Hz, 3H).

<sup>13</sup>C{<sup>1</sup>H} NMR (101 MHz, CDCl<sub>3</sub>) δ 62.6, 59.3, 58.8, 32.2, 32.1, 29.9, 29.8, 29.78, 29.70, 29.6, 29.5, 28.3, 27.7, 27.6, 26.1, 22.8, 20.8, 20.6, 14.3.

IR ν 2927, 2856, 1473, 1105, 827, 647 cm<sup>-1</sup>.

HRMS (ESI) m/z = [M + Na<sup>+</sup>] calculated for C<sub>25</sub>H<sub>52</sub>O<sub>3</sub>SiNa<sup>+</sup> 451.3578, Found 451.3583 (1.1 ppm error).

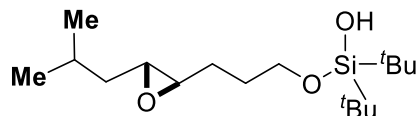

di-*tert*-butyl(3-((2*R*\*,3*R*\*)-3-isobutyloxiran-2-yl)propoxy)silanol

**Compound 9:** Synthesized using General Procedure B on a 1.0 mmol scale; Purified using a gradient of 0-3% acetone in CH<sub>2</sub>Cl<sub>2</sub> on silica gel; single diastereomer; (colorless oil, 300.0 mg, 0.948 mmol, 95% yield).

<sup>1</sup>H NMR (400 MHz, CDCl<sub>3</sub>) δ 3.94 – 3.79 (m, 2H), 2.75 – 2.58 (m, 3H), 1.86 – 1.66 (m, 4H), 1.56 (ddt, *J* = 14.7, 7.0, 5.2 Hz, 1H), 1.47 (dt, *J* = 13.9, 6.1 Hz, 1H), 1.33 (ddd, *J* = 13.6, 7.7, 5.4 Hz, 1H), 1.01 (s, 9H), 1.00 (s, 9H), 0.96 (d, *J* = 4.5 Hz, 3H), 0.94 (d, *J* = 4.4 Hz, 3H).

<sup>13</sup>C{<sup>1</sup>H} NMR (101 MHz, CDCl<sub>3</sub>) δ 62.6, 59.4, 57.7, 41.2, 29.8, 28.3, 27.7, 27.6, 26.5, 23.2, 22.6, 20.8, 20.6.

IR ν 3480, 2960, 2933, 2859, 1471, 1106, 827, 648 cm<sup>-1</sup>.

HRMS (ESI) *m/z* = [M + Na<sup>+</sup>] calculated for C<sub>17</sub>H<sub>36</sub>O<sub>3</sub>SiNa<sup>+</sup> 339.2331, Found 339.2340 (2.7 ppm error).

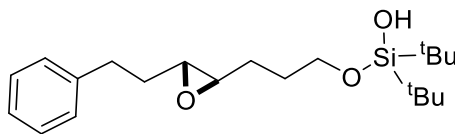

di-*tert*-butyl(3-((2*R*\*,3*R*\*)-3-phenethyloxiran-2-yl)propoxy)silanol

**Compound 11:** Synthesized using General Procedure B on a 2.24 mmol scale; Purified using a gradient of 0-3% acetone in CH<sub>2</sub>Cl<sub>2</sub> on silica gel; single diastereomer; (colorless oil, 547 mg, 1.5 mmol, 67% yield).

<sup>1</sup>H NMR (400 MHz, CDCl<sub>3</sub>) δ 7.33 – 7.26 (m, 2H), 7.23 – 7.15 (m, 3H), 3.92 – 3.77 (m, 2H), 2.82 (ddd, *J* = 14.4, 8.1, 6.6 Hz, 1H), 2.77 – 2.63 (m, 3H), 2.60 – 2.51 (m, 1H), 1.93 – 1.78 (m, 2H), 1.72 – 1.49 (m, 4H), 1.02 (s, 9H), 1.00 (s, 9H).

<sup>13</sup>C{<sup>1</sup>H} NMR (101 MHz, CDCl<sub>3</sub>) δ 141.4, 128.6, 128.5, 126.2, 62.6, 59.5, 58.1, 33.9, 32.4, 29.7, 28.2, 27.7, 27.6, 20.8, 20.6.

IR ν 3478, 2933, 2857, 1471, 1104, 827, 699, 648 cm<sup>-1</sup>

HRMS (ESI) *m/z* = [M + H<sup>+</sup>] calculated for C<sub>21</sub>H<sub>37</sub>O<sub>3</sub>Si<sup>+</sup> 365.2512, Found 365.2506 (1.6 ppm error).

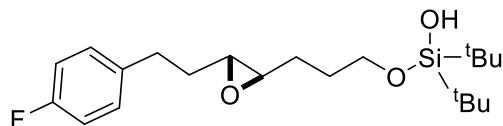

di-*tert*-butyl(3-(3-(4-fluorophenethyl)oxiran-2-yl)propoxy)silanol

**Compound 13:** Synthesized using General Procedure B on a 1.25 mmol scale; Purified using a gradient of 0-3% acetone in CH<sub>2</sub>Cl<sub>2</sub> on silica gel; single diastereomer; (colorless oil, 443 mg, 1.16 mmol, 92% yield).

<sup>1</sup>H NMR (400 MHz, CDCl<sub>3</sub>) δ 7.19 – 7.09 (m, 2H), 7.02 – 6.92 (m, 2H), 3.90 – 3.77 (m, 2H), 2.78 (dt, *J* = 14.4, 7.0 Hz, 1H), 2.72 (m, 4H), 1.82 (tdd, *J* = 7.5, 5.6, 2.4 Hz, 2H), 1.74 – 1.57 (m, 3H), 1.58 – 1.45 (m, 1H), 1.01 (s, 9H), 1.00 (s, 9H).

<sup>13</sup>C{<sup>1</sup>H} (101 MHz, CDCl<sub>3</sub>) δ 161.5 (d, *J* = 243.9 Hz), 137.0 (d, *J* = 3.5 Hz), 129.8 (d, *J* = 8.0 Hz), 115.3 (d, *J* = 21.3 Hz), 62.6, 59.4, 58.0, 34.0, 31.6, 29.7, 28.2, 27.67, 27.61, 20.7, 20.6.

<sup>19</sup>F NMR (377 MHz, CDCl<sub>3</sub>) δ -118.0 (ddd, *J* = 14.1, 9.1, 5.6 Hz).

IR ν 3487, 2965, 2859, 1510, 1106, 827 cm<sup>-1</sup>.

HRMS (ESI-TOF) *m/z* = [*M* + Na<sup>+</sup>] Calcd C<sub>21</sub>H<sub>35</sub>FO<sub>3</sub>SiNa<sup>+</sup> 405.2237, found 405.2240 (0.7 ppm error).

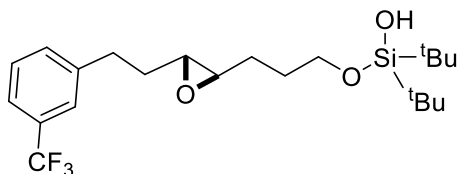

di-*tert*-butyl(3-(3-(4-(trifluoromethyl)phenethyl)oxiran-2-yl)propoxy)silanol

**Compound 15:** Synthesized using General Procedure B on a 1.3 mmol scale; Purified using a gradient of 0-3% acetone in CH<sub>2</sub>Cl<sub>2</sub> on silica gel; single diastereomer; (colorless oil, 393 mg, 0.908 mmol, 70% yield).

<sup>1</sup>H NMR (400 MHz, CDCl<sub>3</sub>) δ 7.45 (d, *J* = 8.6 Hz, 2H), 7.41 – 7.32 (m, 2H), 3.84 (td, *J* = 5.7, 2.4 Hz, 2H), 2.93 – 2.66 (m, 4H), 1.96 – 1.77 (m, 2H), 1.73 – 1.50 (m, 4H), 1.01 (s, 9H), 1.00 (s, 9H).

<sup>13</sup>C{<sup>1</sup>H} NMR (101 MHz, CDCl<sub>3</sub>) δ 142.2, 131.94, 130.9 (q, *J* = 31.9 Hz), 129.0, 125.7 (q, *J* = 271.7 Hz), 125.2 (q, *J* = 3.7 Hz), 123.1 (q, *J* = 3.9 Hz), 62.6, 59.4, 57.9, 33.7, 32.2, 29.6, 28.2, 27.6, 27.5, 20.7, 20.5.

<sup>19</sup>F NMR (377 MHz, CDCl<sub>3</sub>) δ -63.2.

IR ν 3499, 2958, 2860, 1471, 1330, 1075, 828 cm<sup>-1</sup>.

HRMS (ESI-TOF)  $m/z = [M + Na^+]$  Calcd  $C_{22}H_{35}F_3O_3SiNa^+$  455.2205, found 455.2183 (4.8 ppm error).

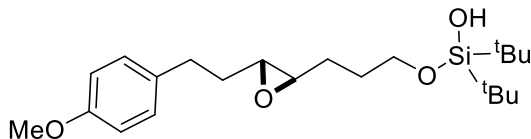

di-*tert*-butyl(3-((2*R*\*,3*R*\*)-3-(4-methoxyphenethyl)oxiran-2-yl)propoxy)silanol

**Compound 17:** Synthesized using General Procedure B on a 1.2 mmol scale; Purified using a gradient of 0-3% acetone in  $CH_2Cl_2$  on silica gel; single diastereomer; (colorless oil, 417 mg, 1.06 mmol, 88% yield).

$^1H$  NMR (400 MHz,  $CDCl_3$ )  $\delta$  7.11 (d,  $J = 8.5$  Hz, 2H), 6.83 (d,  $J = 8.6$  Hz, 2H), 3.90 – 3.80 (m, 2H), 3.79 (s, 3H), 2.80 – 2.61 (m, 4H), 2.58 (s, 1H), 1.81 (td,  $J = 7.6, 5.4$  Hz, 2H), 1.73 – 1.50 (m, 4H), 1.02 (s, 9H), 1.00 (s, 9H).

$^{13}C\{^1H\}$  NMR (101 MHz,  $CDCl_3$ )  $\delta$  158.0, 133.4, 129.4, 114.0, 62.6, 59.4, 58.1, 55.4, 34.1, 31.4, 29.7, 28.2, 27.7, 27.6, 20.7, 20.6.

IR  $\nu$  3480, 2933, 2859, 1652, 1507, 1473, 1246, 1106, 827, 647  $cm^{-1}$ .

HRMS (ESI)  $m/z = [M + Na^+]$  calcd for  $C_{22}H_{38}O_4SiNa^+$  417.2437, found 417.2434 (0.7 ppm error).

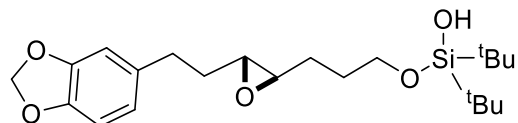

(3-(3-(2-(benzo[*d*][1,3]dioxol-5-yl)ethyl)oxiran-2-yl)propoxy)di-*tert*-butylsilanol

**Compound 19:** Synthesized using General Procedure B on a 1.2 mmol scale; Purified using a gradient of 0-3% acetone in  $CH_2Cl_2$  on silica gel; single diastereomer; (colorless oil, 302 mg, 0.739 mmol, 62% yield).

$^1H$  NMR (400 MHz,  $CDCl_3$ )  $\delta$  6.75 – 6.58 (m, 3H), 5.91 (s, 2H), 3.83 (tt,  $J = 6.7, 3.8$  Hz, 2H), 2.81 – 2.56 (m, 4H), 1.79 (td,  $J = 7.7, 5.5$  Hz, 2H), 1.71 – 1.60 (m, 3H), 1.58 – 1.50 (m, 1H), 1.01 (s, 9H), 1.00 (s, 9H).

$^{13}C\{^1H\}$  (101 MHz,  $CDCl_3$ )  $\delta$  147.7, 145.9, 135.2, 121.2, 108.9, 108.3, 100.9, 62.6, 59.4, 58.0, 34.1, 32.1, 29.7, 28.2, 27.65, 27.60, 20.7, 20.6.

IR  $\nu$  3497, 2961, 2857, 1445, 1246, 1040, 855  $cm^{-1}$ .

HRMS (ESI-TOF)  $m/z = [M + Na^+]$  Calcd  $C_{22}H_{36}O_5SiNa^+$  431.2230, found 431.2237 (1.6 ppm error).



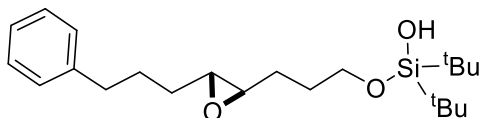

di-*tert*-butyl(3-((2*R*\*,3*R*\*)-3-(3-phenylpropyl)oxiran-2-yl)propoxy)silanol

**Compound 21:** Synthesized using General Procedure B on a 1.53 mmol scale; Purified using a gradient of 0-3% acetone in CH<sub>2</sub>Cl<sub>2</sub> on silica gel; single diastereomer; (colorless oil, 522 mg, 1.38 mmol, 90% yield).

<sup>1</sup>H NMR (400 MHz, CDCl<sub>3</sub>) δ 7.31 – 7.26 (m, 2H), 7.22 – 7.13 (m, 3H), 3.95 – 3.78 (m, 2H), 2.75 – 2.68 (m, 2H), 2.66 (t, *J* = 7.7 Hz, 2H), 2.60 (s, 1H), 1.85 – 1.65 (m, 5H), 1.62 – 1.48 (m, 3H), 1.02 (s, 9H), 1.00 (s, 9H).

<sup>13</sup>C{<sup>1</sup>H} NMR (101 MHz, CDCl<sub>3</sub>) δ 142.1, 128.53, 128.48, 126.0, 62.6, 59.1, 58.6, 35.8, 31.7, 29.8, 28.3, 27.9, 27.7, 27.6, 20.8, 20.6.

IR ν 2933, 2859, 1558, 1507, 1473, 1457, 1106, 827, 698, 647 cm<sup>-1</sup>.

HRMS (ESI) *m/z* = [*M* + H<sup>+</sup>] calculated for C<sub>22</sub>H<sub>39</sub>O<sub>3</sub>Si<sup>+</sup> 379.2668, Found 379.2662 (1.6 ppm error).

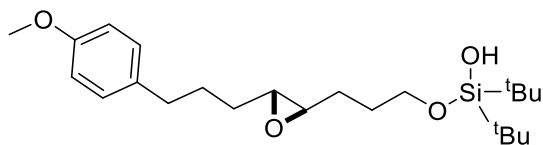

di-*tert*-butyl(3-(3-(3-(4-methoxyphenyl)propyl)oxiran-2-yl)propoxy)silanol

**Compound 23:** Synthesized using General Procedure B on a 1.4 mmol scale; Purified using a gradient of 0-3% acetone in CH<sub>2</sub>Cl<sub>2</sub> on silica gel; single diastereomer; (colorless oil, 490 mg, 1.20 mmol, 86% yield).

<sup>1</sup>H NMR (400 MHz, CDCl<sub>3</sub>) δ 7.13 – 7.05 (m, 2H), 6.86 – 6.78 (m, 2H), 3.90 – 3.82 (m, 2H), 3.78 (s, 3H), 2.75 – 2.67 (m, 2H), 2.59 (t, *J* = 7.6 Hz, 2H), 1.85 – 1.61 (m, 5H), 1.55 (dddd, *J* = 9.0, 6.9, 5.2, 3.6 Hz, 3H), 1.01 (s, 9H), 1.00 (s, 9H).

<sup>13</sup>C{<sup>1</sup>H} (101 MHz, CDCl<sub>3</sub>) δ 157.9, 134.2, 129.4, 113.9, 62.6, 59.1, 58.6, 55.4, 34.8, 31.6, 29.8, 28.3, 28.1, 27.68, 27.62, 20.8, 20.6.

IR ν 3503, 2857, 1612, 1511, 1038, 1177, 828 cm<sup>-1</sup>.

HRMS (ESI-TOF) *m/z* = [*M* + Na<sup>+</sup>] Calcd for C<sub>22</sub>H<sub>38</sub>O<sub>4</sub>SiNa<sup>+</sup> 417.2437, found 417.2450 (3.1 ppm error).

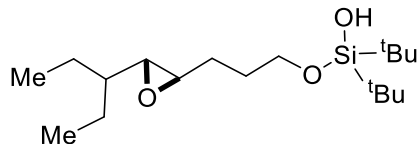

di-*tert*-butyl(3-((2*R*\*,3*R*\*)-3-(pentan-3-yl)oxiran-2-yl)propoxy)silanol

**Compound 25:** Synthesized using General Procedure B on a 1.13 mmol scale; Purified using a gradient of 0-3% acetone in CH<sub>2</sub>Cl<sub>2</sub> on silica gel; single diastereomer; (colorless oil, 345 mg, 1.04 mmol, 92% yield).

<sup>1</sup>H NMR (400 MHz, CDCl<sub>3</sub>) δ 3.90 – 3.78 (m, 2H), 2.86 (s, 1H), 2.71 (ddd, *J* = 7.4, 3.8, 2.3 Hz, 1H), 2.45 (dd, *J* = 8.3, 2.4 Hz, 1H), 1.78 – 1.62 (m, 3H), 1.59 – 1.36 (m, 4H), 1.35 – 1.22 (m, 1H), 1.04 – 0.94 (m, 19H), 0.93 – 0.86 (m, 6H).

<sup>13</sup>C{<sup>1</sup>H} NMR (101 MHz, CDCl<sub>3</sub>) δ 62.6, 62.4, 58.8, 44.2, 29.9, 28.3, 27.7, 27.6, 25.3, 23.8, 20.8, 20.6, 12.0, 11.2.

IR ν 3445, 2963, 2933, 2859, 1473, 1106, 827, 750, 647 cm<sup>-1</sup>.

HRMS (ESI) *m/z* = [M + Na<sup>+</sup>] calculated for C<sub>18</sub>H<sub>38</sub>O<sub>3</sub>SiNa<sup>+</sup> 353.2488, Found 353.2501 (3.7 ppm error).

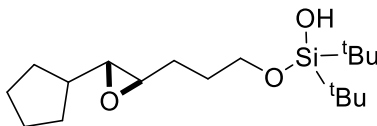

di-*tert*-butyl(3-((2*R*\*,3*R*\*)-3-cyclopentylloxiran-2-yl)propoxy)silanol

**Compound 27:** Synthesized using General Procedure B on a 1.0 mmol scale; Purified using a gradient of 0-3% acetone in CH<sub>2</sub>Cl<sub>2</sub> on silica gel; single diastereomer; (colorless oil, 296.6 mg, 0.903 mmol, 90% yield).

<sup>1</sup>H NMR (400 MHz, CDCl<sub>3</sub>) δ 3.92 – 3.80 (m, 2H), 2.73 (ddd, *J* = 6.3, 3.9, 2.4 Hz, 1H), 2.67 – 2.52 (m, 2H), 1.83 – 1.51 (m, 11H), 1.47 – 1.30 (m, 2H), 1.01 (s, 9H), 1.00 (s, 9H).

<sup>13</sup>C{<sup>1</sup>H} NMR (101 MHz, CDCl<sub>3</sub>) δ 62.6, 62.2, 58.6, 41.5, 29.9, 29.4, 28.9, 28.3, 27.7, 27.6, 25.5, 20.8, 20.6.

IR ν 2954, 2944, 2860, 1473, 1106, 827, 648 cm<sup>-1</sup>.

HRMS (ESI) *m/z* = [M + Na<sup>+</sup>] calculated for C<sub>18</sub>H<sub>36</sub>O<sub>3</sub>SiNa<sup>+</sup> 351.2331, Found 351.2341 (2.8 ppm error).

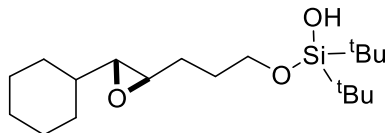

di-*tert*-butyl(3-((2*R*\*,3*R*\*)-3-cyclohexyloxiran-2-yl)propoxy)silanol

**Compound 29:** Synthesized using General Procedure B on a 2.14 mmol scale; Purified using a gradient of 0-3% acetone in CH<sub>2</sub>Cl<sub>2</sub> on silica gel; single diastereomer; (colorless oil, 705 mg, 2.06 mmol, 96% yield).

<sup>1</sup>H NMR (400 MHz, CDCl<sub>3</sub>) δ 3.93 – 3.76 (m, 2H), 2.76 (ddd, *J* = 6.7, 4.1, 2.4 Hz, 1H), 2.61 (s, 1H), 2.48 (dd, *J* = 6.8, 2.3 Hz, 1H), 1.88 – 1.81 (m, 1H), 1.76 – 1.56 (m, 8H), 1.28 – 1.05 (m, 6H), 1.01 (s, 9H), 1.00 (s, 9H).

<sup>13</sup>C{<sup>1</sup>H} NMR (101 MHz, CDCl<sub>3</sub>) δ 63.2, 62.6, 58.1, 40.2, 29.9, 29.8, 29.1, 28.4, 27.7, 27.6, 26.4, 25.8, 25.7, 20.8, 20.6.

IR ν 2928, 2856, 1473, 1097, 827, 647 cm<sup>-1</sup>.

HRMS (ESI) *m/z* = [M + Na<sup>+</sup>] calculated for C<sub>19</sub>H<sub>38</sub>O<sub>3</sub>SiNa<sup>+</sup> 365.2488, Found 365.2493 (1.4 ppm error).

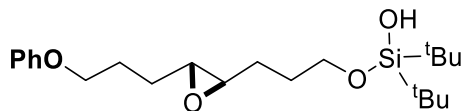

di-*tert*-butyl(3-((2*R*\*,3*R*\*)-3-(3-phenoxypropyl)oxiran-2-yl)propoxy)silanol

**Compound 31:** Synthesized using General Procedure B on a 0.978 mmol scale; Purified using a gradient of 0-3% acetone in CH<sub>2</sub>Cl<sub>2</sub> on silica gel; single diastereomer; (colorless oil, 303 mg, 0.768 mmol, 79% yield).

<sup>1</sup>H NMR (400 MHz, CDCl<sub>3</sub>) δ 7.27 – 7.22 (m, 2H), 6.94 – 6.82 (m, 3H), 4.03 – 3.91 (m, 2H), 3.89 – 3.76 (m, 2H), 2.81 – 2.68 (m, 2H), 2.58 (s, 1H), 2.00 – 1.83 (m, 2H), 1.82 – 1.51 (m, 6H), 0.99 (s, 9H), 0.97 (s, 9H).

<sup>13</sup>C{<sup>1</sup>H} NMR (101 MHz, CDCl<sub>3</sub>) δ 159.0, 129.6, 120.8, 114.6, 67.3, 62.6, 59.2, 58.3, 29.8, 28.9, 28.2, 27.7, 27.6, 26.0, 20.8, 20.6.

IR ν 2933, 2859, 2358, 2330, 1473, 1276, 1260, 827, 750 cm<sup>-1</sup>.

HRMS (ESI) *m/z* = [M + Na<sup>+</sup>] calculated for C<sub>22</sub>H<sub>38</sub>O<sub>4</sub>SiNa<sup>+</sup> 417.2437, Found 417.2435 (0.5 ppm error).

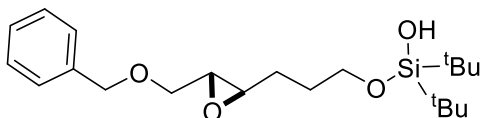

(3-((2*R*\*,3*R*\*)-3-((benzyloxy)methyl)oxiran-2-yl)propoxy)di-*tert*-butylsilanol

**Compound 33:** Synthesized using General Procedure B on a 1.6 mmol scale; Purified using a gradient of 0-3% acetone in CH<sub>2</sub>Cl<sub>2</sub> on silica gel; single diastereomer; (colorless oil, 408 mg, 1.07 mmol, 67% yield).

<sup>1</sup>H NMR (400 MHz, CDCl<sub>3</sub>) δ 7.30 – 7.16 (m, 5H), 4.56 – 4.41 (m, 2H), 3.85 – 3.72 (m, 2H), 3.60 (dd, *J* = 11.4, 3.5 Hz, 1H), 3.43 (dd, *J* = 11.4, 5.4 Hz, 1H), 2.90 (ddd, *J* = 5.6, 3.5, 2.3 Hz, 1H), 2.80 (ddd, *J* = 6.6, 4.1, 2.3 Hz, 1H), 2.41 (s, 1H), 1.73 – 1.59 (m, 3H), 1.58 – 1.48 (m, 1H), 0.93 (s, 9H), 0.92 (s, 9H).

<sup>13</sup>C{<sup>1</sup>H} NMR (101 MHz, CDCl<sub>3</sub>) δ 138.0, 128.6, 127.9 (2C), 73.5, 70.4, 62.6, 57.0, 56.5, 29.6, 28.0, 27.7, 27.6, 20.7, 20.6.

IR ν 2933, 2859, 2358, 1473, 1110, 827, 647 cm<sup>-1</sup>.

HRMS (ESI) *m/z* = [*M* + Na<sup>+</sup>] calculated for C<sub>21</sub>H<sub>36</sub>O<sub>4</sub>SiNa<sup>+</sup> 403.2281, Found 403.2289 (2.0 ppm error).

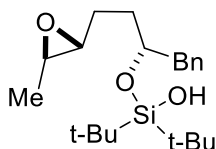

di-*tert*-butyl(((*R*\*)-4-((2*R*\*,3*R*\*)-3-methyloxiran-2-yl)-1-phenylbutan-2-yl)oxy)silanol

**Compound 35:** Synthesized using General Procedure B on a 2.0 mmol scale; Purified by preparative TLC using 10% ether in hexane on silica gel; single diastereomer; (colorless oil, 253 mg, 0.694 mmol, 35% yield).

<sup>1</sup>H NMR (400 MHz, CDCl<sub>3</sub>) δ 7.33 – 7.25 (m, 2H), 7.24 – 7.15 (m, 3H), 4.38 – 4.24 (m, 1H), 2.90 – 2.70 (m, 3H), 2.70 – 2.60 (m, 1H), 1.85 – 1.58 (m, 5H), 1.28 (d, *J* = 5.1 Hz, 3H), 1.00 (s, 9H), 0.94 (s, 9H).

<sup>13</sup>C{<sup>1</sup>H} NMR (101 MHz, CDCl<sub>3</sub>) δ 139.2, 129.8, 128.4, 126.4, 73.8, 60.0, 54.8, 43.4, 32.6, 27.82, 27.78, 27.0, 20.7, 20.6, 17.8.

IR ν 3460, 2933, 2857, 1473, 1095, 827, 700, 645 cm<sup>-1</sup>.

HRMS (ESI) *m/z* = [*M* + Na<sup>+</sup>] calculated for C<sub>21</sub>H<sub>36</sub>O<sub>3</sub>SiNa<sup>+</sup> 387.2331, Found 387.2350 (4.9 ppm error).

**Compound 37:** Previously characterized in *Org. Lett.* **2022**, *24*, 939–943.

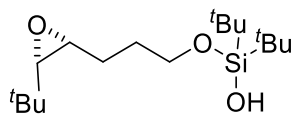

di-*tert*-butyl(3-((2*R*\*,3*S*\*)-3-(*tert*-butyl)oxiran-2-yl)propoxy)silanol

**Compound 39:** Synthesized using General Procedure B on a 1.64 mmol scale; Purified using a gradient of 0-3% acetone in CH<sub>2</sub>Cl<sub>2</sub> on silica gel; single diastereomer; (colorless oil, 507 mg, 1.6 mmol, 98% yield).

<sup>1</sup>H NMR (400 MHz, CDCl<sub>3</sub>) δ 3.89 (t, *J* = 5.8 Hz, 2H), 2.87 (dt, *J* = 6.9, 4.7 Hz, 1H), 2.67 (d, *J* = 4.5 Hz, 1H), 2.53 (s, 1H), 1.86 – 1.78 (m, 2H), 1.78 – 1.68 (m, 2H), 1.05 – 0.96 (m, 27H).

<sup>13</sup>C{<sup>1</sup>H} NMR (101 MHz, CDCl<sub>3</sub>) δ 65.7, 62.7, 59.5, 31.8, 31.4, 27.9, 27.7, 27.6, 24.8, 20.8, 20.6.

IR ν 3471, 2961, 2933, 2859, 1471, 1106, 827, 648 cm<sup>-1</sup>.

HRMS (ESI) *m/z* = [M + H<sup>+</sup>] calculated for C<sub>17</sub>H<sub>37</sub>O<sub>3</sub>Si<sup>+</sup> 317.2512, Found 317.2513 (0.3 ppm error).

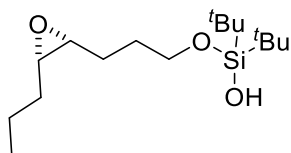

di-*tert*-butyl(3-(3-propyloxiran-2-yl)propoxy)silanol

**Compound 41:** Synthesized using Procedure B on a 1.5 mmol scale; Purified using a gradient of 0-3% acetone in CH<sub>2</sub>Cl<sub>2</sub> on silica gel; single diastereomer; (colorless oil, 363 mg, 1.20 mmol, 80% yield).

<sup>1</sup>H NMR (400 MHz, CDCl<sub>3</sub>) δ 3.94 – 3.86 (m, 2H), 2.96 (ddd, *J* = 6.0, 4.2, 2.4 Hz, 2H), 1.85 – 1.62 (m, 4H), 1.60 – 1.46 (m, 4H), 1.04 (s, 9H), 1.03 (s, 9H), 1.01 – 0.97 (m, 3H).

<sup>13</sup>C{<sup>1</sup>H} (101 MHz, CDCl<sub>3</sub>) δ 62.6, 57.5, 57.1, 30.3, 29.9, 27.68, 27.61, 24.2, 20.8, 20.5, 20.0, 14.1.

IR ν 3463, 2963, 2857, 1386, 1012, 827 cm<sup>-1</sup>.

HRMS (ESI-TOF) *m/z* = [M + Na<sup>+</sup>] Calcd C<sub>16</sub>H<sub>34</sub>O<sub>3</sub>SiNa<sup>+</sup> 325.2175, found 325.2166 (2.8 ppm error).

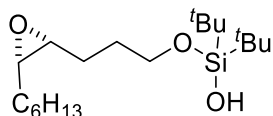

di-*tert*-butyl(3-(3-hexyloxiran-2-yl)propoxy)silanol

**Compound 43:** Synthesized using Procedure B on a 1.58 mmol scale.; Purified using a gradient of 0-3% acetone in CH<sub>2</sub>Cl<sub>2</sub> on silica gel; single diastereomer; (colorless oil, 457 mg, 1.33 mmol, 84% yield).

<sup>1</sup>H NMR (400 MHz, CDCl<sub>3</sub>) δ 3.95 – 3.85 (m, 2H), 3.01 – 2.90 (m, 2H), 1.80 – 1.62 (m, 4H), 1.57 – 1.44 (m, 3H), 1.39 – 1.22 (m, 7H), 1.03 (s, 9H), 1.02 (s, 9H), 0.95 – 0.86 (m, 3H).

<sup>13</sup>C{<sup>1</sup>H} (101 MHz, CDCl<sub>3</sub>) δ 62.6, 57.6, 57.4, 31.9, 30.3, 29.3, 27.9, 27.68, 27.61, 26.6, 24.2, 22.7, 20.7, 20.5, 14.2.

IR v 3480, 2961, 2859, 1471, 1012, 827 cm<sup>-1</sup>.

HRMS (ESI-TOF) m/z = [M + Na<sup>+</sup>] Calcd C<sub>19</sub>H<sub>40</sub>O<sub>3</sub>SiNa<sup>+</sup> 367.2644, found 367.2633 (3 ppm error).

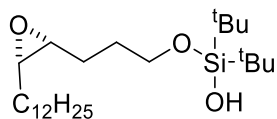

di-*tert*-butyl(3-(3-dodecyloxiran-2-yl)propoxy)silanol

**Compound 45:** Synthesized using General Procedure B on a 1.36 mmol scale; Purified using a gradient of 0-3% acetone in CH<sub>2</sub>Cl<sub>2</sub> on silica gel; single diastereomer; (colorless oil, 524 mg, 1.22 mmol, 90% yield).

<sup>1</sup>H NMR (400 MHz, CDCl<sub>3</sub>) δ 3.92 – 3.82 (m, 2H), 2.98 – 2.87 (m, 2H), 1.78 – 1.37 (m, 8H), 1.27 – 1.23 (m, 18H), 1.00 (s, 9H), 0.99 (s, 9H), 0.91 – 0.81 (m, 3H).

<sup>13</sup>C{<sup>1</sup>H} (101 MHz, CDCl<sub>3</sub>) δ 62.6, 57.6, 57.4, 32.1, 30.3, 29.80, 29.77, 29.70, 29.68, 29.5, 27.9, 27.69, 27.61, 26.7, 24.1, 22.8, 20.7, 20.5, 14.2.

IR v 3436, 2954, 1470, 1386, 1103, 828 cm<sup>-1</sup>.

HRMS (ESI-TOF) m/z = [M + H<sup>+</sup>] Calcd C<sub>25</sub>H<sub>53</sub>O<sub>3</sub>Si<sup>+</sup> 429.3764, found 429.3778 (3.3 ppm error).

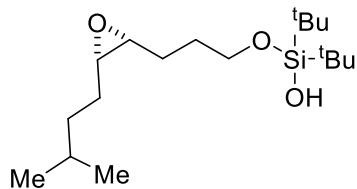

di-*tert*-butyl(3-(3-isopentyloxiran-2-yl)propoxy)silanol

**Compound 47:** Synthesized using General Procedure B on a 1.46 mmol scale; Purified using a gradient of 0-3% acetone in CH<sub>2</sub>Cl<sub>2</sub> on silica gel; single diastereomer; (colorless oil, 434 mg, 1.31 mmol, 90% yield).

<sup>1</sup>H NMR (400 MHz, CDCl<sub>3</sub>) δ 3.95 – 3.85 (m, 2H), 2.95 – 2.88 (m, 2H), 1.83 – 1.21 (m, 9H), 1.03 (s, 9H), 1.02 (s, 9H), 0.91 (d, J = 6.6 Hz, 6H).

<sup>13</sup>C{<sup>1</sup>H} (101 MHz, CDCl<sub>3</sub>) δ 62.6, 57.6, 57.5, 35.6, 30.3, 28.1, 27.68, 27.60, 25.8, 24.1, 22.64, 22.53, 20.7, 20.5.

IR ν 3472, 2960, 2857, 1470, 1386, 1012, 827 cm<sup>-1</sup>.

HRMS (ESI-TOF) m/z = [M + Na<sup>+</sup>] Calcd C<sub>18</sub>H<sub>38</sub>O<sub>3</sub>SiNa<sup>+</sup> 353.2488, found 353.2504 (4.5 ppm error).

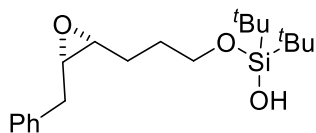

(3-(3-benzyloxiran-2-yl)propoxy)di-*tert*-butylsilanol

**Compound 49:** Synthesized using General Procedure B on a 1.2 mmol scale; Purified using a gradient of 0-3% acetone in CH<sub>2</sub>Cl<sub>2</sub> on silica gel; single diastereomer; (colorless oil, 274 mg, 0.782 mmol, 65% yield).

<sup>1</sup>H NMR (400 MHz, CDCl<sub>3</sub>) δ 7.40 – 7.22 (m, 5H), 3.95 (ddd, J = 5.7, 4.5, 1.5 Hz, 2H), 3.23 (td, J = 6.3, 4.2 Hz, 1H), 3.07 (dt, J = 7.4, 4.3 Hz, 1H), 3.03 – 2.91 (m, 1H), 2.91 – 2.80 (m, 1H), 1.92 – 1.68 (m, 4H), 1.07 (s, 9H), 1.06 (s, 9H).

<sup>13</sup>C{<sup>1</sup>H} (101 MHz, CDCl<sub>3</sub>) δ 137.9, 128.9, 128.8, 126.7, 62.6, 57.7, 57.5, 34.4, 30.3, 27.68, 27.63, 24.4, 20.7, 20.6.

IR ν 3482, 2963, 2857, 1473, 1386, 1012, 827 cm<sup>-1</sup>.

HRMS (ESI-TOF) m/z = [M + Na<sup>+</sup>] Calcd C<sub>20</sub>H<sub>34</sub>O<sub>3</sub>SiNa<sup>+</sup> 373.2175, found 373.2158 (4.6 ppm error).

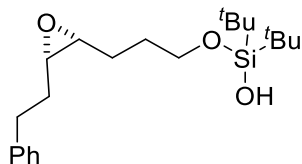

di-*tert*-butyl(3-(3-phenethyloxiran-2-yl)propoxy)silanol

**Compound 51:** Synthesized using General Procedure B on a 1.47 mmol scale; Purified using a gradient of 0-3% acetone in CH<sub>2</sub>Cl<sub>2</sub> on silica gel; single diastereomer; (colorless oil, 455 mg, 1.25 mmol, 85% yield).

<sup>1</sup>H NMR (400 MHz, CDCl<sub>3</sub>) δ 7.34 – 7.15 (m, 5H), 3.92 – 3.80 (m, 2H), 3.03 – 2.91 (m, 2H), 2.90 – 2.81 (m, 1H), 2.79 – 2.69 (m, 1H), 1.93 – 1.79 (m, 2H), 1.75 – 1.65 (m, 2H), 1.63 – 1.52 (m, 2H), 1.02 (s, 9H), 1.01 (s, 9H).

<sup>13</sup>C{<sup>1</sup>H} (101 MHz, CDCl<sub>3</sub>) δ 141.4, 128.59, 128.56, 126.2, 62.6, 57.8, 56.7, 33.0, 30.3, 29.9, 27.69, 27.62, 24.1, 20.8, 20.5.

IR ν 3499, 2965, 1471, 1386, 1012, 827 cm<sup>-1</sup>.

HRMS (ESI-TOF) m/z = [M + Na<sup>+</sup>] Calcd C<sub>21</sub>H<sub>36</sub>O<sub>3</sub>SiNa<sup>+</sup> 387.2331, found 387.2350 (4.9 ppm error).

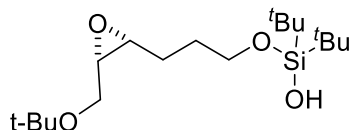

(3-(3-(*tert*-butoxymethyl)oxiran-2-yl)propoxy)di-*tert*-butylsilanol

**Compound 53:** Synthesized using General Procedure B on a 1.2 mmol scale; Purified using a gradient of 0-3% acetone in CH<sub>2</sub>Cl<sub>2</sub> on silica gel; (colorless oil, 298 mg, 0.860 mmol, 71% yield).

<sup>1</sup>H NMR (400 MHz, CDCl<sub>3</sub>) δ 3.86 (t, J = 5.8 Hz, 2H), 3.55 – 3.38 (m, 2H), 3.09 (td, J = 5.5, 4.3 Hz, 1H), 3.00 (dt, J = 7.3, 4.5 Hz, 1H), 1.80 – 1.53 (m, 4H), 1.19 (s, 9H), 0.99 (s, 9H), 0.98 (s, 9H).

<sup>13</sup>C{<sup>1</sup>H} (101 MHz, CDCl<sub>3</sub>) δ 73.5, 62.6, 60.0, 57.0, 56.0, 30.2, 27.7, 27.6, 27.5, 24.3, 20.7, 20.5.

IR ν 3445, 2967, 2860, 1471, 1364, 1013, 828 cm<sup>-1</sup>.

HRMS (ESI-TOF) m/z = [M + Na<sup>+</sup>] Calcd C<sub>18</sub>H<sub>38</sub>O<sub>4</sub>SiNa<sup>+</sup> 369.2437, found 369.2428 (2.4 ppm error).



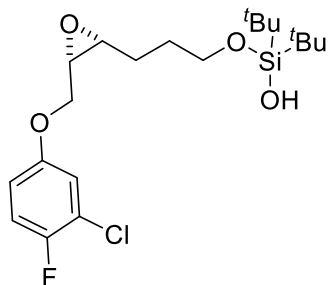

di-*tert*-butyl(3-(3-((3-chloro-4-fluorophenoxy)methyl)oxiran-2-yl)propoxy)silanol

**Compound 55:** Synthesized using General Procedure B on a 1.4 mmol scale; Purified using a gradient of 0-3% acetone in CH<sub>2</sub>Cl<sub>2</sub> on silica gel; single diastereomer; (colorless oil, 469 mg, 1.12 mmol, 80% yield).

<sup>1</sup>H NMR (400 MHz, CDCl<sub>3</sub>) δ 7.03 (t, *J* = 8.8 Hz, 1H), 6.94 (dd, *J* = 5.9, 3.1 Hz, 1H), 6.77 (dt, *J* = 9.0, 3.4 Hz, 1H), 4.13 (dd, *J* = 10.8, 4.2 Hz, 1H), 3.99 (dd, *J* = 10.8, 6.3 Hz, 1H), 3.87 (td, *J* = 5.2, 1.9 Hz, 2H), 3.31 (dt, *J* = 6.3, 4.3 Hz, 1H), 3.16 – 3.07 (m, 1H), 1.81 – 1.61 (m, 4H), 1.00 (s, 9H), 0.99 (s, 9H).

<sup>13</sup>C{<sup>1</sup>H} NMR (101 MHz, CDCl<sub>3</sub>) δ 154.8 (d, *J* = 2.5 Hz), 153.1 (d, *J* = 241.8 Hz), 121.2 (d, *J* = 19.2 Hz), 116.8 (d, *J* = 22.8 Hz), 116.5, 114.4 (d, *J* = 6.6 Hz), 67.3, 62.5, 56.6, 54.4, 30.0, 27.6, 27.5, 24.6, 20.6, 20.5.

<sup>19</sup>F NMR (377 MHz, CDCl<sub>3</sub>) δ -126.4 (d, *J* = 5.3 Hz).

IR v 2933, 2859, 1558, 1498, 1202, 1107, 827 cm<sup>-1</sup>.

HRMS (ESI-TOF) *m/z* = [M + Na<sup>+</sup>] Calcd C<sub>20</sub>H<sub>32</sub>FCIO<sub>4</sub>SiNa<sup>+</sup> 441.1640, found 441.1644 (0.9 ppm error).

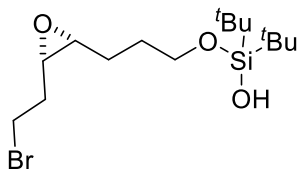

(3-(3-(2-bromoethyl)oxiran-2-yl)propoxy)di-*tert*-butylsilanol

**Compound 57:** Synthesized using General Procedure B on a 1.4 mmol scale; Purified using a gradient of 0-3% acetone in CH<sub>2</sub>Cl<sub>2</sub> on silica gel; single diastereomer; (colorless oil, 360 mg, 0.980 mmol, 70% yield).

<sup>1</sup>H NMR (400 MHz, CDCl<sub>3</sub>) δ 3.86 (dd, *J* = 6.9, 4.9 Hz, 2H), 3.60 – 3.43 (m, 2H), 3.14 – 2.97 (m, 2H), 2.20 – 1.99 (m, 2H), 1.77 – 1.66 (m, 3H), 1.65 – 1.54 (m, 1H), 1.00 (s, 9H), 0.99 (s, 9H).

<sup>13</sup>C{<sup>1</sup>H} (101 MHz, CDCl<sub>3</sub>) δ 62.6, 57.4, 55.6, 31.3, 30.1, 29.6, 27.6, 27.5, 24.4, 20.7, 20.5.

IR v 3499, 2964, 2859, 1471, 1386, 1012, 827 cm<sup>-1</sup>.

HRMS (ESI-TOF) *m/z* = [M + Na<sup>+</sup>] Calcd C<sub>15</sub>H<sub>31</sub>BrO<sub>3</sub>SiNa<sup>+</sup> 389.1124, found 389.1120 (1.0 ppm error).

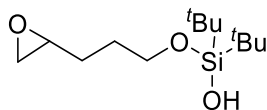

**Compound 59:** Synthesized using General Procedure B on a 2.66 mmol scale; Purified using a gradient of 0-3% acetone in CH<sub>2</sub>Cl<sub>2</sub> on silica gel; (colorless oil, 545 mg, 2.09 mmol, 79% yield).

<sup>1</sup>H NMR (400 MHz, CDCl<sub>3</sub>) δ 3.89 – 3.84 (m, 2H), 3.00 – 2.91 (m, 1H), 2.80 – 2.73 (m, 1H), 2.53 – 2.46 (m, 2H), 1.76 – 1.67 (m, 3H), 1.63 – 1.53 (m, 1H), 1.01 (s, 9H), 1.00 (s, 9H).

<sup>13</sup>C{<sup>1</sup>H} NMR (101 MHz, CDCl<sub>3</sub>) δ 62.7, 52.7, 47.1, 29.6, 28.8, 27.7, 27.6, 20.7, 20.6.

IR ν 3474, 2933, 2857, 1473, 1104, 826, 648 cm<sup>-1</sup>.

HRMS (ESI) m/z = [M + H<sup>+</sup>] calculated for C<sub>13</sub>H<sub>29</sub>O<sub>3</sub>Si<sup>+</sup> 261.1886, Found 261.1886 (error 0.0 ppm).

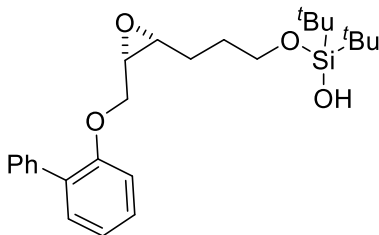

(3-(3-((1,1'-biphenyl)-2-yloxy)methyl)oxiran-2-yl)propoxy)di-*tert*-butylsilanol

**Compound 61:** Synthesized using General Procedure B on a 1.4 mmol scale.; Purified using a gradient of 0-3% acetone in CH<sub>2</sub>Cl<sub>2</sub> on silica gel; (colorless oil, 526 mg, 1.19 mmol, 85% yield).

<sup>1</sup>H NMR (400 MHz, CDCl<sub>3</sub>) δ 7.55 – 7.47 (m, 2H), 7.39 – 7.23 (m, 5H), 7.07 – 6.90 (m, 2H), 4.06 (d, J = 5.3 Hz, 2H), 3.80 (td, J = 5.9, 4.1 Hz, 2H), 3.22 (td, J = 5.2, 4.3 Hz, 1H), 3.00 (ddd, J = 6.9, 5.1, 4.2 Hz, 1H), 1.76 – 1.50 (m, 4H), 0.98 (s, 9H), 0.97 (s, 9H).

<sup>13</sup>C{<sup>1</sup>H} (101 MHz, CDCl<sub>3</sub>) δ 155.5, 138.4, 131.5, 131.1, 129.7, 128.7, 128.1, 127.0, 121.8, 113.4, 67.2, 62.5, 56.7, 54.7, 30.0, 27.63, 27.59, 24.5, 20.67, 20.64.

IR ν 3486, 2964, 1505, 1473, 1230, 1009, 827 cm<sup>-1</sup>.

HRMS (ESI-TOF) m/z = [M + H<sup>+</sup>] Calcd C<sub>26</sub>H<sub>39</sub>O<sub>4</sub>Si<sup>+</sup> 443.2618, found 443.2606 (2.7 ppm error).

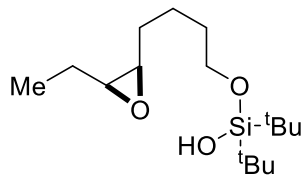

**Compound 63:** Synthesized using General Procedure B on a 4.35 mmol scale; Purified using a gradient of 0-3% acetone in CH<sub>2</sub>Cl<sub>2</sub> on silica gel; single diastereomer; (colorless oil, 1.21 g, 4.0 mmol, 92% yield).

<sup>1</sup>H NMR (400 MHz, CDCl<sub>3</sub>) δ 3.81 (t, *J* = 6.0 Hz, 2H), 3.00 – 2.83 (m, 2H), 2.19 (s, 1H), 1.65 – 1.57 (m, 3H), 1.56 – 1.46 (m, 5H), 1.05 – 0.99 (m, 21H).

<sup>13</sup>C{<sup>1</sup>H} NMR (101 MHz, CDCl<sub>3</sub>) δ 63.1, 58.7, 57.6, 32.7, 27.63, 27.62, 27.4, 22.9, 21.2, 20.64, 20.59, 10.7.

IR ν 3480, 2967, 2933, 2859, 1471, 1103, 827, 647 cm<sup>-1</sup>.

HRMS (ESI) *m/z* = [M + Na<sup>+</sup>] calcd for C<sub>16</sub>H<sub>34</sub>O<sub>3</sub>SiNa<sup>+</sup> 325.2175, found 325.2179 (1.2 ppm error)

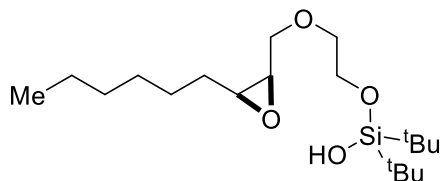

di-*tert*-butyl(2-(((2*R*\*,3*S*\*)-3-hexyloxiran-2-yl)methoxy)ethoxy)silanol

**Compound 65:** Synthesized using General Procedure B on a 2.8 mmol scale; Purified using a gradient of 0-3% acetone in CH<sub>2</sub>Cl<sub>2</sub> on silica gel; single diastereomer; (colorless oil, 650 mg, 1.8 mmol, 64% yield).

<sup>1</sup>H NMR (400 MHz, CDCl<sub>3</sub>) δ 4.04 – 3.92 (m, 2H), 3.75 (dd, *J* = 11.1, 4.0 Hz, 1H), 3.67 – 3.55 (m, 2H), 3.52 – 3.46 (m, 1H), 3.30 (s, 1H), 3.14 (dt, *J* = 6.7, 4.2 Hz, 1H), 2.98 (td, *J* = 6.0, 4.3 Hz, 1H), 1.57 – 1.46 (m, 3H), 1.46 – 1.38 (m, 1H), 1.38 – 1.24 (m, 6H), 1.02 (s, 18H), 0.92 – 0.85 (m, 3H).

<sup>13</sup>C{<sup>1</sup>H} NMR (101 MHz, CDCl<sub>3</sub>) δ 73.5, 69.4, 63.0, 56.4, 55.0, 31.8, 29.2, 28.2, 27.5, 26.8, 22.7, 20.69, 20.66, 14.2.

IR ν 3480, 2931, 2857, 1473, 1457, 1103, 828, 648 cm<sup>-1</sup>.

HRMS (ESI) *m/z* = [M + Na<sup>+</sup>] calculated for C<sub>19</sub>H<sub>40</sub>O<sub>4</sub>SiNa<sup>+</sup> 383.2594, Found 383.2600 (1.6 ppm error).

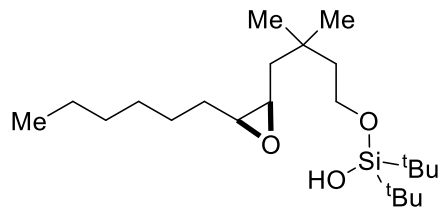

di-*tert*-butyl(4-((2*R*\*,3*S*\*)-3-hexyloxiran-2-yl)-3,3-dimethylbutoxy)silanol

**Compound 67:** Synthesized using General Procedure B on a 0.6 mmol scale; Purified using a gradient of 0-3% acetone in CH<sub>2</sub>Cl<sub>2</sub> on silica gel; single diastereomer; (colorless oil, 216.5 mg, 0.56 mmol, 93% yield).

<sup>1</sup>H NMR (400 MHz, CDCl<sub>3</sub>) δ 3.94 – 3.76 (m, 2H), 3.04 (ddd, *J* = 8.0, 4.4, 3.2 Hz, 1H), 2.91 (td, *J* = 5.9, 4.4 Hz, 1H), 2.78 (s, 1H), 1.71 – 1.58 (m, 2H), 1.57 – 1.39 (m, 5H), 1.39 – 1.26 (m, 7H), 1.03 (s, 3H), 1.01 (s, 9H), 1.00 (s, 9H), 0.98 (s, 3H), 0.92 – 0.86 (m, 3H).

<sup>13</sup>C{<sup>1</sup>H} NMR (101 MHz, CDCl<sub>3</sub>) δ 60.3, 56.7, 54.4, 44.3, 39.4, 32.4, 31.9, 29.4, 28.5, 28.3, 28.1, 27.7, 27.6, 26.7, 22.7, 20.8, 20.3, 14.2.

IR ν 3480, 2960, 2931, 2857, 1471, 1096, 827, 647 cm<sup>-1</sup>.

HRMS (ESI) *m/z* = [M + Na<sup>+</sup>] calculated for C<sub>22</sub>H<sub>46</sub>O<sub>3</sub>SiNa<sup>+</sup> 409.3114, Found 409.3116 (0.5 ppm error).

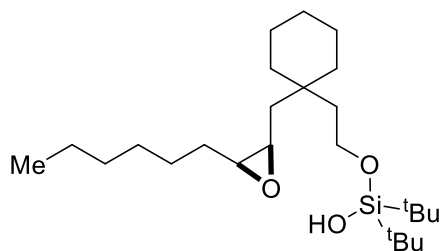

di-*tert*-butyl(2-(1-(((2*R*\*,3*S*\*)-3-hexyloxiran-2-yl)methyl)cyclohexyl)ethoxy)silanol

**Compound 69:** Synthesized using General Procedure B on a 1.7 mmol scale; Purified using a gradient of 0-3% acetone in CH<sub>2</sub>Cl<sub>2</sub> on silica gel; single diastereomer; (colorless oil, 662 mg, 1.55 mmol, 91% yield).

<sup>1</sup>H NMR (400 MHz, CDCl<sub>3</sub>) δ 3.89 (td, *J* = 10.5, 4.7 Hz, 1H), 3.76 (td, *J* = 10.3, 6.2 Hz, 1H), 3.46 (s, 1H), 3.06 (ddd, *J* = 9.2, 4.5, 2.2 Hz, 1H), 2.98 – 2.87 (m, 1H), 1.88 – 1.77 (m, 1H), 1.69 – 1.61 (m, 2H), 1.55 – 1.42 (m, 9H), 1.41 – 1.21 (m, 12H), 1.01 (s, 9H), 1.01 (s, 9H), 0.92 – 0.86 (m, 3H).

<sup>13</sup>C{<sup>1</sup>H} NMR (101 MHz, CDCl<sub>3</sub>) δ 59.6, 56.7, 54.1, 39.5, 36.8, 36.7, 36.2, 34.7, 31.9, 29.3, 28.1, 27.7, 27.5, 26.7, 26.5, 22.7, 21.7, 21.0, 20.2, 14.2.

IR ν 3496, 2930, 2856, 1471, 1092, 827, 647 cm<sup>-1</sup>.

HRMS (ESI) *m/z* = [M + Na<sup>+</sup>] calculated for C<sub>25</sub>H<sub>50</sub>O<sub>3</sub>SiNa 449.3427, Found 449.3444 (3.8 ppm error).

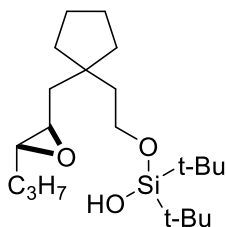

di-*tert*-butyl(2-(1-(3-propyloxiran-2-yl)methyl)cyclopentyl)ethoxy)silanol

**Compound 71:** Synthesized using General Procedure B on a 1.2 mmol scale; Purified using a gradient of 0-3% acetone in CH<sub>2</sub>Cl<sub>2</sub> on silica gel; (colorless oil, 351 mg, 0.947 mmol, 79% yield).

<sup>1</sup>H NMR (400 MHz, CDCl<sub>3</sub>) δ 3.86 (td, J = 10.1, 5.2 Hz, 1H), 3.72 (td, J = 9.9, 6.4 Hz, 1H), 2.72 (ddd, J = 7.6, 3.7, 2.4 Hz, 1H), 2.64 (td, J = 5.4, 2.5 Hz, 1H), 1.80 – 1.64 (m, 2H), 1.63 – 1.53 (m, 5H), 1.50 – 1.34 (m, 9H), 0.97 (s, 18H), 0.91 (t, J = 7.2 Hz, 3H).

<sup>13</sup>C{<sup>1</sup>H} (101 MHz, CDCl<sub>3</sub>) δ 60.6, 58.4, 57.1, 43.7, 41.6, 40.7, 38.4, 38.0, 34.2, 27.64, 27.55, 24.4, 24.2, 20.8, 20.3, 19.4, 14.1.

IR ν 3544, 2941, 2856, 1471, 1386, 1097, 827 cm<sup>-1</sup>.

HRMS (ESI-TOF) m/z = [M + Na<sup>+</sup>] Calcd C<sub>21</sub>H<sub>42</sub>O<sub>3</sub>SiNa<sup>+</sup> 393.2801, found 393.2809 (2.0 ppm error).

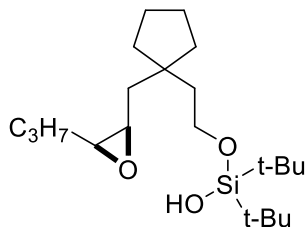

di-*tert*-butyl(2-(1-(3-propyloxiran-2-yl)methyl)cyclopentyl)ethoxy)silanol

**Compound 73:** Synthesized using General Procedure B on a 1.3 mmol scale; Purified using a gradient of 0-3% acetone in CH<sub>2</sub>Cl<sub>2</sub> on silica gel; (colorless oil, 458 mg, 1.24 mmol, 95% yield).

<sup>1</sup>H NMR (400 MHz, CDCl<sub>3</sub>) δ 3.95 (td, J = 10.4, 4.9 Hz, 1H), 3.77 (td, J = 10.3, 6.1 Hz, 1H), 3.05 (ddd, J = 8.8, 4.5, 2.4 Hz, 1H), 2.95 (td, J = 5.8, 4.4 Hz, 1H), 1.89 – 1.77 (m, 1H), 1.75 – 1.60 (m, 6H), 1.58 – 1.47 (m, 7H), 1.46 – 1.37 (m, 2H), 1.08 – 0.93 (m, 21H).

<sup>13</sup>C{<sup>1</sup>H} (101 MHz, CDCl<sub>3</sub>) δ 60.6, 56.5, 55.3, 43.7, 41.7, 38.6, 38.2, 36.2, 30.1, 27.7, 27.5, 24.4, 24.1, 21.0, 20.1, 20.0, 14.2.

IR ν 3493, 2941, 2861, 1471, 1386, 1095, 827 cm<sup>-1</sup>.

HRMS (ESI-TOF) m/z = [M + H<sup>+</sup>] Calcd C<sub>21</sub>H<sub>43</sub>O<sub>3</sub>Si<sup>+</sup> 371.2981, found 371.2996 (4.0 ppm error).

## VII. Rearrangement Reaction Procedures

### General Procedure C

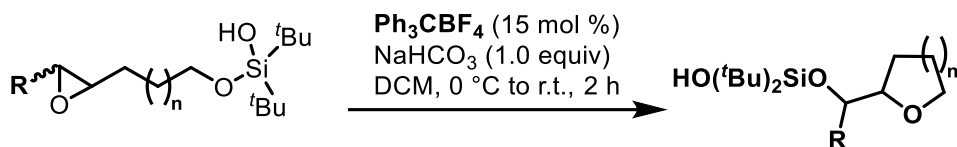

An oven-dried microwave vial equipped with a stir bar was cooled under nitrogen and charged with silanol epoxide (0.2 mmol),  $\text{NaHCO}_3$  (1.0 equiv, 0.2 mmol, 16.8 mg) and  $\text{CH}_2\text{Cl}_2$  (1.0 mL). The resulting mixture was cooled to 0 °C using an ice-water bath and stirred at this temperature for 10 minutes.  $\text{Ph}_3\text{CBF}_4$  (0.15 equiv, 0.03 mmol, 10.0 mg) was added to the heterogeneous mixture in one portion, and the sides of the reaction vial were rinsed with an additional 1 mL of  $\text{CH}_2\text{Cl}_2$  (Final concentration: 0.1 M). The reaction mixture was allowed to warm to room temperature over a period of two hours. Next, the reaction mixture was diluted with  $\text{CH}_2\text{Cl}_2$ , and transferred to a separatory funnel. The organic layer was washed with saturated aqueous  $\text{NaHCO}_3$ , collected, dried over anhydrous  $\text{Na}_2\text{SO}_4$ , and concentrated under reduced pressure. The resulting residue was purified by chromatography on silica gel (specific conditions are associated with each product).

### Scale-up Procedure

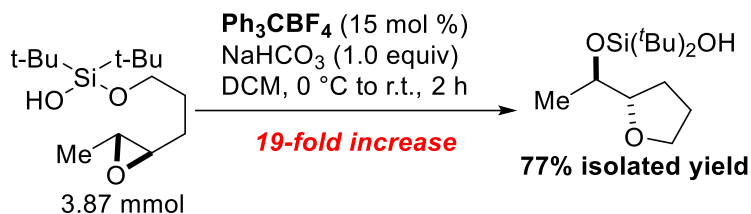

An oven-dried 100 mL round bottom flask equipped with a stir bar was cooled under nitrogen and charged with di-tert-butyl(3-(3-methyloxiran-2-yl)propoxy)silanol (1.0 equiv, 1.062 g, 3.87 mmol),  $\text{NaHCO}_3$  (1.0 equiv, 3.87 mmol, 325.0 mg) and  $\text{CH}_2\text{Cl}_2$  (0.1 M, 40.0 mL). The resulting mixture was cooled to 0 °C using an ice-water bath and stirred at this temperature for 10 minutes. Then,  $\text{Ph}_3\text{CBF}_4$  (0.15 equiv, 0.58 mmol, 192.0 mg) was added to the reaction mixture in one portion. The reaction mixture was removed from the ice-water bath and allowed to warm to room temperature over a period of two hours. Next, the reaction mixture was diluted with  $\text{CH}_2\text{Cl}_2$ , and transferred to a separatory funnel. The organic layer was washed with saturated aqueous  $\text{NaHCO}_3$  solution, collected, dried over anhydrous  $\text{Na}_2\text{SO}_4$ , and concentrated under reduced pressure. The resulting residue was purified by chromatography on silica gel using a gradient of 0.1 to 2.0% acetone in  $\text{CH}_2\text{Cl}_2$  as eluent. The desired product was obtained as a colorless oil in a 77% yield (818.2 mg, 2.98 mmol).

## VIII. Characterization of Rearrangement Products

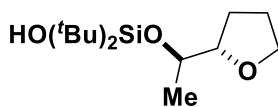

di-*tert*-butyl((*R*<sup>\*</sup>)-1-((*S*<sup>\*</sup>)-tetrahydrofuran-2-yl)ethoxy)silanol

**Compound 2:** Synthesized using General Procedure C on a 0.2 mmol scale; Purified using a gradient of 0.1 to 2.0% acetone in CH<sub>2</sub>Cl<sub>2</sub> on silica gel; single diastereomer; (colorless oil, 42.8 mg, 0.156 mmol, 78% yield).

<sup>1</sup>H NMR (400 MHz, CDCl<sub>3</sub>) δ 4.40 (qd, *J* = 6.5, 2.5 Hz, 1H), 3.97 – 3.89 (m, 1H), 3.78 – 3.70 (m, 1H), 3.65 (ddd, *J* = 8.6, 6.0, 2.5 Hz, 1H), 1.98 – 1.84 (m, 3H), 1.82 – 1.70 (m, 1H), 1.15 (d, *J* = 6.5 Hz, 3H), 1.03 (s, 9H), 0.99 (s, 9H).

<sup>13</sup>C{<sup>1</sup>H} NMR (101 MHz, CDCl<sub>3</sub>) δ 84.1, 68.1, 67.7, 27.9, 27.7, 25.2, 23.2, 21.2, 20.5, 20.3.

IR ν 3436, 2963, 2860, 1475, 650 cm<sup>-1</sup>.

HRMS (ESI) *m/z* = [M + Na<sup>+</sup>] calculated for C<sub>14</sub>H<sub>30</sub>O<sub>3</sub>SiNa<sup>+</sup> 297.1862, Found 297.1881 (6.4 ppm error).

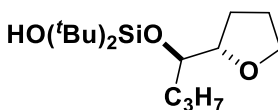

di-*tert*-butyl((*R*<sup>\*</sup>)-1-((*S*<sup>\*</sup>)-tetrahydrofuran-2-yl)butoxy)silanol

**Compound 4:** Synthesized using General Procedure C on a 0.2 mmol scale; Purified using a gradient of 0.1 to 2.0% acetone in CH<sub>2</sub>Cl<sub>2</sub> on silica gel; single diastereomer; (colorless oil, 46.6 mg, 0.154 mmol, 77% yield).

<sup>1</sup>H NMR (400 MHz, CDCl<sub>3</sub>) δ 4.32 (td, *J* = 6.4, 2.2 Hz, 1H), 4.14 (s, 1H), 4.01 – 3.91 (m, 1H), 3.76 – 3.67 (m, 2H), 1.99 – 1.82 (m, 3H), 1.77 – 1.67 (m, 1H), 1.54 – 1.30 (m, 4H), 1.04 (s, 9H), 0.99 (s, 9H), 0.93 (t, *J* = 6.9 Hz, 3H).

<sup>13</sup>C{<sup>1</sup>H} NMR (101 MHz, CDCl<sub>3</sub>) δ 83.0, 71.4, 67.9, 37.6, 28.0, 27.8, 25.0, 23.0, 21.5, 20.6, 19.5, 14.6.

IR ν 3425, 2963, 2934, 2859, 1473, 1089, 827, 647 cm<sup>-1</sup>.

HRMS (ESI) *m/z* = [M + Na<sup>+</sup>] calculated for C<sub>16</sub>H<sub>34</sub>O<sub>3</sub>SiNa<sup>+</sup> 325.2175, Found 325.2197 (6.8 ppm error).

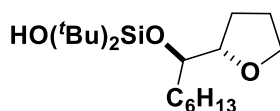

di-*tert*-butyl(((*R*<sup>\*</sup>)-1-((*S*<sup>\*</sup>)-tetrahydrofuran-2-yl)heptyl)oxy)silanol

**Compound 6:** Synthesized using General Procedure C on a 0.2 mmol scale; Purified using a gradient of 0.1 to 2.0% acetone in CH<sub>2</sub>Cl<sub>2</sub> on silica gel; single diastereomer; (colorless oil, 53.6 mg, 0.156 mmol, 78% yield).

<sup>1</sup>H NMR (400 MHz, CDCl<sub>3</sub>) δ 4.30 (td, *J* = 6.5, 2.3 Hz, 1H), 4.13 (s, 1H), 4.01 – 3.91 (m, 1H), 3.77 – 3.63 (m, 2H), 1.99 – 1.82 (m, 3H), 1.78 – 1.66 (m, 1H), 1.57 – 1.37 (m, 3H), 1.33 – 1.22 (m, 7H), 1.04 (s, 9H), 0.99 (s, 9H), 0.91 – 0.85 (m, 3H).

<sup>13</sup>C{<sup>1</sup>H} NMR (101 MHz, CDCl<sub>3</sub>) δ 82.9, 71.6, 67.9, 35.3, 31.9, 29.7, 28.0, 27.8, 26.1, 25.0, 23.0, 22.7, 21.5, 20.6, 14.2.

IR ν 3409, 2933, 2857, 1473, 1100, 827, 648 cm<sup>-1</sup>.

HRMS (ESI) *m/z* = [M + Na<sup>+</sup>] calculated for C<sub>19</sub>H<sub>40</sub>O<sub>3</sub>SiNa<sup>+</sup> 367.2644, Found 367.2672 (7.6 ppm error).

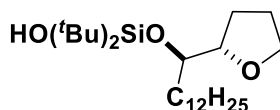

di-*tert*-butyl(((*R*<sup>\*</sup>)-1-((*S*<sup>\*</sup>)-tetrahydrofuran-2-yl)tridecyl)oxy)silanol

**Compound 8:** Synthesized using General Procedure C on a 0.2 mmol scale; Purified using a gradient of 0.1 to 2.0% acetone in CH<sub>2</sub>Cl<sub>2</sub> on silica gel; single diastereomer; (colorless oil, 68.6 mg, 0.160 mmol, 80% yield).

<sup>1</sup>H NMR (400 MHz, CDCl<sub>3</sub>) δ 4.30 (td, *J* = 6.4, 2.3 Hz, 1H), 4.13 (s, 1H), 4.00 – 3.91 (m, 1H), 3.76 – 3.67 (m, 2H), 1.99 – 1.82 (m, 3H), 1.79 – 1.66 (m, 1H), 1.56 – 1.38 (m, 3H), 1.26 (s, 19H), 1.04 (s, 9H), 0.99 (s, 9H), 0.91 – 0.85 (m, 3H).

<sup>13</sup>C{<sup>1</sup>H} NMR (101 MHz, CDCl<sub>3</sub>) δ 82.9, 71.6, 67.9, 35.3, 32.1, 30.0, 29.82, 29.78, 29.71, 29.67, 29.5, 28.0, 27.8, 26.2, 25.1, 23.0, 22.8, 21.5, 20.6, 14.3.

IR ν 3442, 2927, 2856, 1473, 1105, 875, 827, 648 cm<sup>-1</sup>.

HRMS (ESI) *m/z* = [M + Na<sup>+</sup>] calculated for C<sub>25</sub>H<sub>52</sub>O<sub>3</sub>SiNa<sup>+</sup> 451.3583, Found 451.3609 (5.8 ppm error).



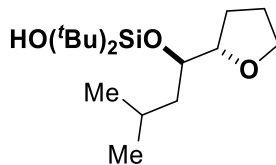

di-*tert*-butyl((*R*<sup>\*</sup>)-3-methyl-1-((*S*<sup>\*</sup>)-tetrahydrofuran-2-yl)butoxy)silanol

**Compound 10:** Synthesized using General Procedure C on a 0.2 mmol scale; Purified using a gradient of 0.1 to 2.0% acetone in CH<sub>2</sub>Cl<sub>2</sub> on silica gel; single diastereomer; (colorless oil, 45.0 mg, 0.142 mmol, 71% yield).

<sup>1</sup>H NMR (400 MHz, CDCl<sub>3</sub>) δ 4.44 – 4.33 (m, 1H), 4.13 (s, 1H), 4.01 – 3.91 (m, 1H), 3.77 – 3.65 (m, 2H), 1.99 – 1.84 (m, 3H), 1.76 – 1.60 (m, 2H), 1.42 (ddd, *J* = 14.1, 8.1, 6.3 Hz, 1H), 1.32 (ddd, *J* = 13.9, 7.7, 6.2 Hz, 1H), 1.04 (s, 9H), 0.99 (s, 9H), 0.92 (d, *J* = 5.0 Hz, 3H), 0.91 (d, *J* = 4.9 Hz, 3H).

<sup>13</sup>C{<sup>1</sup>H} NMR (101 MHz, CDCl<sub>3</sub>) δ 82.7, 69.7, 68.0, 44.7, 28.0, 27.8, 25.0, 24.8, 23.7, 22.81, 22.77, 21.4, 20.6.

IR ν 3437, 2958, 2933, 2857, 1471, 1090, 827, 648 cm<sup>-1</sup>.

HRMS (ESI-TOF) *m/z* = [M + Na<sup>+</sup>] calculated for C<sub>17</sub>H<sub>36</sub>O<sub>3</sub>SiNa<sup>+</sup> 339.2331, found 339.2331 (0.0 ppm error).

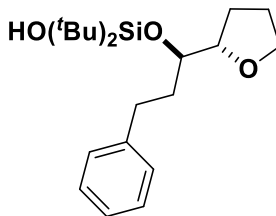

di-*tert*-butyl((*R*<sup>\*</sup>)-3-phenyl-1-((*S*<sup>\*</sup>)-tetrahydrofuran-2-yl)propoxy)silanol

**Compound 12:** Synthesized using General Procedure C on a 0.2 mmol scale; Purified using a gradient of 0.1 to 2.0% acetone in CH<sub>2</sub>Cl<sub>2</sub> on silica gel; (colorless oil, 51.8 mg, 0.142 mmol, 71% yield).

<sup>1</sup>H NMR (400 MHz, CDCl<sub>3</sub>) δ 7.33 – 7.26 (m, 2H), 7.23 – 7.15 (m, 3H), 4.40 (td, *J* = 6.5, 2.3 Hz, 1H), 4.03 – 3.95 (m, 1H), 3.83 – 3.70 (m, 2H), 2.81 (ddd, *J* = 13.6, 10.7, 6.3 Hz, 1H), 2.66 (ddd, *J* = 13.6, 10.7, 6.0 Hz, 1H), 2.01 – 1.86 (m, 3H), 1.86 – 1.71 (m, 3H), 1.05 (s, 9H), 1.03 (s, 9H).

<sup>13</sup>C{<sup>1</sup>H} NMR (101 MHz, CDCl<sub>3</sub>) δ 142.2, 128.6, 128.4, 126.1, 82.9, 71.4, 68.0, 37.2, 32.7, 28.0, 27.8, 25.1, 23.3, 21.5, 20.6.

IR ν 3409, 2933, 2857, 1473, 1072, 827, 648 cm<sup>-1</sup>.

HRMS (ESI-TOF)  $m/z = [M + Na^+]$  Calcd  $C_{21}H_{36}O_3SiNa^+$  387.2331, found 387.2330 (0.3 ppm error)

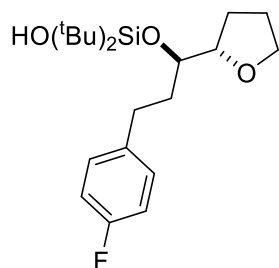

di-*tert*-butyl(3-(4-fluorophenyl)-1-tetrahydrofuran-2-yl)propoxy)silanol

**Compound 14:** Synthesized using General Procedure C on a 0.2 mmol scale; Purified using a gradient of 0-3 % acetone in  $CH_2Cl_2$  on silica gel; single diastereomer; (colorless oil, 56 mg, 0.146 mmol, 73% yield).

$^1H$  NMR (400 MHz,  $CDCl_3$ )  $\delta$  7.18 – 7.09 (m, 2H), 7.02 – 6.91 (m, 2H), 4.37 (td,  $J = 6.4, 2.3$  Hz, 1H), 4.03 – 3.92 (m, 1H), 3.75 (dq,  $J = 14.4, 6.1, 2.6$  Hz, 2H), 2.77 (ddd,  $J = 13.7, 10.4, 6.5$  Hz, 1H), 2.63 (ddd,  $J = 13.8, 10.3, 6.3$  Hz, 1H), 1.99 – 1.88 (m, 3H), 1.91 – 1.68 (m, 3H), 1.04 (s, 9H), 1.02 (s, 9H).

$^{13}C\{^1H\}$  (101 MHz,  $CDCl_3$ )  $\delta$  161.4 (d,  $J = 243.5$  Hz), 137.8 (d,  $J = 3.2$  Hz), 129.7 (d,  $J = 7.5$  Hz), 115.3 (d,  $J = 21.3$  Hz), 82.8, 71.3, 68.0, 37.3, 31.8, 28.0, 27.8, 25.0, 23.3, 21.5, 20.6.

$^{19}F$  NMR (377 MHz,  $CDCl_3$ )  $\delta$  -118.2 – -118.4 (m).

IR  $\nu$  3443, 2965, 2859, 1510, 1110, 827  $cm^{-1}$ .

HRMS (ESI-TOF)  $m/z = [M + Na^+]$  Calcd  $C_{21}H_{35}FO_3SiNa^+$  405.2237, found 405.2240 (0.7 ppm error).

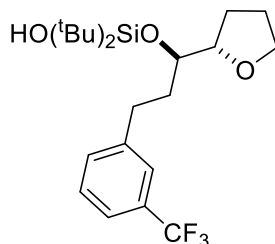

di-*tert*-butyl(1-tetrahydrofuran-2-yl)-3-(3-(trifluoromethyl)phenyl)propoxy)silanol

**Compound 16:** Synthesized using General Procedure C on a 0.2 mmol scale; Purified using a gradient of 0-3% acetone in  $CH_2Cl_2$  on silica gel; (colorless oil, 58 mg, 0.134 mmol, 67% yield).

$^1H$  NMR (400 MHz,  $CDCl_3$ )  $\delta$  7.49 – 7.33 (m, 4H), 4.39 (td,  $J = 6.4, 2.4$  Hz, 1H), 4.04 – 3.93 (m, 1H), 3.76 (ddtd,  $J = 12.2, 8.4, 6.1, 2.5$  Hz, 2H), 2.87 (ddd,  $J = 13.7, 10.3, 6.6$  Hz, 1H), 2.73 (ddd,  $J = 13.7, 10.2, 6.3$  Hz, 1H), 2.06 – 1.88 (m, 3H), 1.88 – 1.68 (m, 3H), 1.05 (s, 9H), 1.02 (s, 9H).

$^{13}C$  NMR (101 MHz,  $CDCl_3$ )  $\delta$  143.1, 131.8, 130.9 (q,  $J = 32.3$  Hz), 128.9, 125.7 (q,  $J = 273$  Hz), 125.0 (q,  $J = 3.7$  Hz), 122.9 (q,  $J = 3.7$  Hz), 82.8, 71.3, 68.0, 36.8, 32.4, 28.0, 27.8, 25.0, 23.4, 21.4, 20.6.

$^{19}\text{F}$  NMR (377 MHz,  $\text{CDCl}_3$ )  $\delta$  -63.2.

IR  $\nu$  3400, 2936, 2891, 1471, 1163, 827  $\text{cm}^{-1}$ .

HRMS (ESI-TOF)  $m/z = [\text{M} + \text{Na}^+]$  Calcd  $\text{C}_{22}\text{H}_{35}\text{F}_3\text{O}_3\text{SiNa}^+$  455.2205, found 455.2217 (2.6 ppm error).

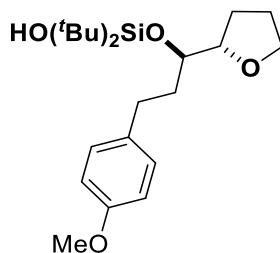

di-*tert*-butyl((*R*<sup>\*</sup>)-3-(4-methoxyphenyl)-1-((*S*<sup>\*</sup>)-tetrahydrofuran-2-yl)propoxy)silanol

**Compound 18:** Synthesized using General Procedure C on a 0.2 mmol scale.; Purified using a gradient of 0.1 to 2.0% acetone in  $\text{CH}_2\text{Cl}_2$  on silica gel; single diastereomer; (colorless oil, 56.8 mg, 0.144 mmol, 72% yield).

$^1\text{H}$  NMR (400 MHz,  $\text{CDCl}_3$ )  $\delta$  7.11 (d,  $J = 8.7$  Hz, 2H), 6.83 (d,  $J = 8.7$  Hz, 2H), 4.38 (td,  $J = 6.5, 2.2$  Hz, 1H), 4.02 – 3.94 (m, 1H), 3.84 – 3.66 (m, 5H), 2.74 (ddd,  $J = 13.7, 10.7, 6.2$  Hz, 1H), 2.60 (ddd,  $J = 13.7, 10.7, 5.9$  Hz, 1H), 2.03 – 1.85 (m, 3H), 1.85 – 1.69 (m, 3H), 1.05 (s, 9H), 1.02 (s, 9H).

$^{13}\text{C}\{^1\text{H}\}$  NMR (101 MHz,  $\text{CDCl}_3$ )  $\delta$  158.0, 134.3, 129.3, 114.0, 82.9, 71.4, 68.0, 55.4, 37.4, 31.7, 28.0, 27.8, 25.1, 23.3, 21.5, 20.6.

IR  $\nu$  3411, 2933, 2857, 1512, 1473, 1246, 1070, 1035, 827, 648  $\text{cm}^{-1}$ .

HRMS (ESI)  $m/z = [\text{M} + \text{Na}^+]$  calculated for  $\text{C}_{22}\text{H}_{38}\text{O}_4\text{SiNa}$  417.2437, Found 417.2458 (5.0 ppm error).

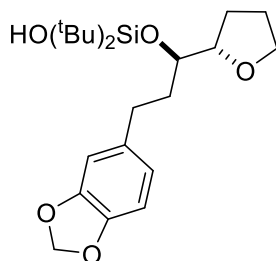

(3-(benzo[*d*][1,3]dioxol-5-yl)-1-tetrahydrofuran-2-yl)propoxydi-*tert*-butylsilanol

**Compound 20:** Synthesized using General Procedure C on a 0.2 mmol scale; Purified using a gradient of 0-3% acetone in  $\text{CH}_2\text{Cl}_2$  on silica gel; single diastereomer; (colorless oil, 59 mg, 0.144 mmol, 72% yield).

$^1\text{H}$  NMR (400 MHz,  $\text{CDCl}_3$ )  $\delta$  6.77 – 6.57 (m, 3H), 5.91 (s, 2H), 4.36 (td,  $J = 6.4, 2.3$  Hz, 1H), 4.03 – 3.92 (m, 1H), 3.74 (dddd,  $J = 14.5, 8.5, 4.8, 1.9$  Hz, 2H), 2.71 (ddd,  $J = 13.7, 10.6, 6.3$  Hz, 1H), 2.58 (ddd,  $J = 13.7, 10.6, 6.0$  Hz, 1H), 1.93 (dddt,  $J = 12.8, 10.9, 7.9, 6.2$  Hz, 3H), 1.81 – 1.56 (m, 3H), 1.04 (s, 9H), 1.01 (s, 9H).

$^{13}\text{C}\{^1\text{H}\}$  (101 MHz,  $\text{CDCl}_3$ )  $\delta$  147.8, 145.8, 136.0, 121.1, 108.9, 108.3, 100.9, 82.8, 71.3, 68.0, 37.5, 32.4, 28.01, 27.80, 25.1, 23.3, 21.5, 20.6.

IR  $\nu$  3566, 2960, 2859, 1504, 1244, 1038, 827  $\text{cm}^{-1}$ .

HRMS (ESI-TOF)  $m/z = [\text{M} + \text{Na}^+]$  Calcd  $\text{C}_{22}\text{H}_{36}\text{O}_5\text{SiNa}^+$  431.2230, found 431.2245 (3.5 ppm error).

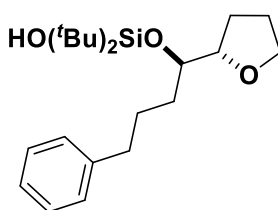

**Compound 22:** Synthesized using General Procedure C on a 0.2 mmol scale; Purified using a gradient of 0.1 to 2.0% acetone in  $\text{CH}_2\text{Cl}_2$  on silica gel; (colorless oil, 60.6 mg, 0.160 mmol, 80% yield).

$^1\text{H}$  NMR (400 MHz,  $\text{CDCl}_3$ )  $\delta$  7.36 – 7.30 (m, 2H), 7.26 – 7.18 (m, 3H), 4.39 (td,  $J = 6.5, 2.2$  Hz, 1H), 4.05 – 3.97 (m, 1H), 3.82 – 3.72 (m, 2H), 2.78 – 2.60 (m, 2H), 2.04 – 1.81 (m, 4H), 1.79 – 1.68 (m, 2H), 1.67 – 1.49 (m, 2H), 1.09 (s, 9H), 1.05 (s, 9H).

$^{13}\text{C}\{^1\text{H}\}$  NMR (101 MHz,  $\text{CDCl}_3$ )  $\delta$  142.2, 128.5, 128.4, 125.9, 82.9, 71.5, 67.9, 36.1, 34.8, 28.0, 27.8, 27.6, 25.0, 23.1, 21.5, 20.6.

IR  $\nu$  3410, 2933, 2857, 1473, 1075, 827, 647  $\text{cm}^{-1}$ .

HRMS (ESI)  $m/z = [\text{M} + \text{Na}^+]$  calculated for  $\text{C}_{22}\text{H}_{38}\text{O}_3\text{SiNa}^+$  401.2488, Found 401.2508 (5.0 ppm error).

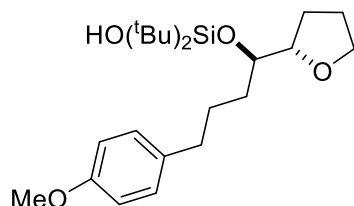

di-*tert*-butyl((4-methoxyphenyl)-1-tetrahydrofuran-2-yl)butoxy)silanol

**Compound 24:** Synthesized using General Procedure C on a 0.2 mmol scale; Purified using a gradient of 0-3% acetone in  $\text{CH}_2\text{Cl}_2$  on silica gel; single diastereomer; (colorless oil, 66 mg, 0.162 mmol, 81% yield).

$^1\text{H}$  NMR (400 MHz,  $\text{CDCl}_3$ )  $\delta$  7.13 – 7.04 (m, 2H), 6.87 – 6.78 (m, 2H), 4.33 (td,  $J = 6.4, 2.3$  Hz, 1H), 4.01 – 3.91 (m, 1H), 3.79 (s, 3H), 3.76 – 3.65 (m, 2H), 2.66 – 2.49 (m, 2H), 1.98 – 1.82 (m, 3H), 1.77 – 1.35 (m, 5H), 1.04 (s, 9H), 1.00 (s, 9H).

$^{13}\text{C}\{^1\text{H}\}$  (101 MHz,  $\text{CDCl}_3$ )  $\delta$  157.9, 134.3, 129.3, 113.9, 82.9, 71.5, 67.9, 55.4, 35.2, 34.7, 28.0, 27.84, 27.80, 25.0, 23.1, 21.5, 20.6.

IR  $\nu$  3524, 2934, 2857, 1512, 1246, 1038, 827  $\text{cm}^{-1}$ .

HRMS (ESI-TOF)  $m/z = [\text{M} + \text{H}^+]$  Calcd  $\text{C}_{23}\text{H}_{41}\text{O}_4\text{Si}^+$  409.2774, found 409.2787 (3.2 ppm error).

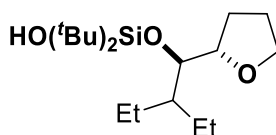

di-*tert*-butyl((*R*<sup>\*</sup>)-2-ethyl-1-((*S*<sup>\*</sup>)-tetrahydrofuran-2-yl)butoxy)silanol

**Compound 26:** Synthesized using General Procedure C on a 0.2 mmol scale; Purified using a gradient of 0.1 to 2.0% acetone in  $\text{CH}_2\text{Cl}_2$  on silica gel; single diastereomer; (colorless oil, 29.1 mg, 0.088 mmol, 44% yield).

$^1\text{H}$  NMR (400 MHz,  $\text{CDCl}_3$ )  $\delta$  4.43 – 4.34 (m, 1H), 4.25 (s, 1H), 3.98 – 3.89 (m, 1H), 3.82 – 3.72 (m, 1H), 3.70 – 3.62 (m, 1H), 2.05 – 1.83 (m, 3H), 1.74 – 1.60 (m, 2H), 1.48 – 1.33 (m, 3H), 1.05 (s, 10H), 1.01 (s, 9H), 0.95 – 0.88 (m, 6H).

$^{13}\text{C}\{^1\text{H}\}$  NMR (101 MHz,  $\text{CDCl}_3$ )  $\delta$  81.4, 72.8, 67.1, 46.5, 28.1, 27.9, 25.5, 24.0, 23.2, 22.5, 21.6, 20.7, 12.6, 12.3.

IR  $\nu$  3429, 2950, 2859, 1473, 1102, 827, 647  $\text{cm}^{-1}$ .

HRMS (ESI)  $m/z = [\text{M} + \text{Na}^+]$  calculated for  $\text{C}_{18}\text{H}_{38}\text{O}_3\text{SiNa}^+$  353.2488, Found 353.2496 (2.3 ppm error).

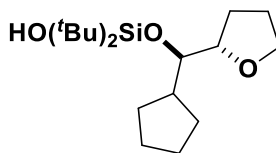

di-*tert*-butyl((*R*<sup>\*</sup>)-cyclopentyl((*S*<sup>\*</sup>)-tetrahydrofuran-2-yl)methoxy)silanol

**Compound 28:** Synthesized using General Procedure C on a 0.2 mmol scale; Purified using a gradient of 0.1 to 2.0% acetone in  $\text{CH}_2\text{Cl}_2$  on silica gel; single diastereomer; (colorless oil, 26.2 mg, 0.080 mmol, 40% yield).

$^1\text{H}$  NMR (400 MHz,  $\text{CDCl}_3$ )  $\delta$  4.48 (s, 1H), 4.21 (dd,  $J = 8.1, 2.0$  Hz, 1H), 4.03 – 3.95 (m, 1H), 3.76 (ddd,  $J = 9.4, 6.7, 2.1$  Hz, 1H), 3.69 (td,  $J = 8.5, 6.6$  Hz, 1H), 2.01 – 1.71 (m, 6H), 1.65 – 1.44 (m, 6H), 1.27 – 1.21 (m, 1H), 1.06 (s, 9H), 1.00 (s, 9H).

$^{13}\text{C}\{^1\text{H}\}$  NMR (101 MHz,  $\text{CDCl}_3$ )  $\delta$  83.1, 76.1, 67.8, 45.4, 30.6, 29.4, 28.2, 27.9, 25.4, 25.1, 24.9, 23.1, 21.9, 20.7.

IR  $\nu$  3409, 2947, 2859, 1473, 1115, 827, 647  $\text{cm}^{-1}$ .

HRMS (ESI-TOF)  $m/z = [\text{M} + \text{Na}^+]$  Calcd  $\text{C}_{18}\text{H}_{36}\text{O}_3\text{SiNa}^+$  351.2331, found 351.2335 (1.1 ppm error).

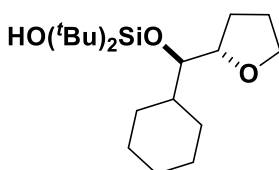

di-*tert*-butyl((*R*<sup>\*</sup>)-cyclohexyl((*S*<sup>\*</sup>)-tetrahydrofuran-2-yl)methoxy)silanol

**Compound 30:** Synthesized using General Procedure C on a 0.2 mmol scale; Purified using a gradient of 0.1 to 2.0% acetone in  $\text{CH}_2\text{Cl}_2$  on silica gel; single diastereomer; (colorless oil, 34.1 mg, 0.1 mmol, 50% yield).

$^1\text{H}$  NMR (400 MHz,  $\text{CDCl}_3$ )  $\delta$  4.36 (s, 1H), 4.14 (dd,  $J = 7.2, 2.0$  Hz, 1H), 4.01 – 3.93 (m, 1H), 3.82 (ddd,  $J = 9.2, 6.8, 2.0$  Hz, 1H), 3.65 (td,  $J = 8.4, 6.7$  Hz, 1H), 2.01 – 1.84 (m, 4H), 1.80 – 1.64 (m, 5H), 1.46 – 1.35 (m, 1H), 1.28 – 1.06 (m, 4H), 1.05 (s, 9H), 1.00 (s, 10H).

$^{13}\text{C}\{^1\text{H}\}$  NMR (101 MHz,  $\text{CDCl}_3$ )  $\delta$  81.9, 75.9, 67.5, 43.2, 30.2, 29.8, 28.1, 27.9, 26.71, 26.69, 25.2, 23.4, 21.8, 20.7.

IR  $\nu$  3445, 2924, 2851, 1448, 1060, 891  $\text{cm}^{-1}$ .

HRMS (ESI-TOF)  $m/z = [\text{M} + \text{Na}^+]$  Calcd  $\text{C}_{19}\text{H}_{38}\text{O}_3\text{SiNa}^+$  365.2488, found 365.2492 (1.1 ppm error).

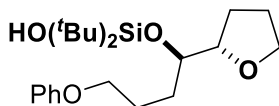

di-*tert*-butyl((*R*<sup>\*</sup>)-4-phenoxy-1-((*S*<sup>\*</sup>)-tetrahydrofuran-2-yl)butoxy)silanol

**Compound 32:** Synthesized using General Procedure C on a 0.2 mmol scale.; Purified using a gradient of 0.1 to 2.0% acetone in  $\text{CH}_2\text{Cl}_2$  on silica gel; (colorless oil, 40.0 mg, 0.101 mmol, 50% yield).

$^1\text{H}$  NMR (400 MHz,  $\text{CDCl}_3$ )  $\delta$  7.30 – 7.25 (m, 2H), 6.94 (tt,  $J = 7.4, 1.1$  Hz, 1H), 6.91 – 6.86 (m, 2H), 4.39 (td,  $J = 6.4, 2.5$  Hz, 1H), 4.11 (s, 1H), 4.04 – 3.91 (m, 3H), 3.79 – 3.70 (m, 2H), 2.00 – 1.83 (m, 5H), 1.83 – 1.74 (m, 1H), 1.72 – 1.64 (m, 2H), 1.05 (s, 9H), 1.01 (s, 9H).

$^{13}\text{C}\{^1\text{H}\}$  NMR (101 MHz,  $\text{CDCl}_3$ )  $\delta$  159.1, 129.6, 120.8, 114.6, 82.9, 71.6, 68.01, 67.96, 31.7, 28.0, 27.8, 25.9, 25.1, 23.5, 21.5, 20.6.

IR  $\nu$  3410, 2933, 2857, 1497, 1473, 1246, 1079, 827, 752, 647  $\text{cm}^{-1}$ .

HRMS (ESI)  $m/z = [\text{M} + \text{Na}^+]$  calculated for  $\text{C}_{22}\text{H}_{38}\text{O}_4\text{SiNa}^+$  417.2437, Found 417.2446 (2.2 ppm error).

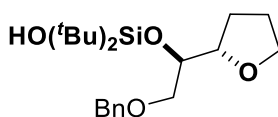

(( $R^*$ )-2-(benzyloxy)-1-(( $S^*$ )-tetrahydrofuran-2-yl)ethoxy)di-*tert*-butylsilanol

**Compound 34:** Synthesized using General Procedure C on a 0.2 mmol scale; Purified using a gradient of 0.1 to 2.0% acetone in  $\text{CH}_2\text{Cl}_2$  on silica gel; single diastereomer; (colorless oil, 65.4 mg, 0.172 mmol, 86% yield).

$^1\text{H}$  NMR (400 MHz,  $\text{CDCl}_3$ )  $\delta$  7.31 – 7.18 (m, 5H), 4.52 – 4.42 (m, 2H), 4.25 (dt,  $J = 7.8, 4.0$  Hz, 1H), 4.03 (s, 1H), 3.84 – 3.77 (m, 1H), 3.76 – 3.70 (m, 1H), 3.70 – 3.63 (m, 1H), 3.51 (dd,  $J = 9.8, 3.7$  Hz, 1H), 3.37 (dd,  $J = 9.8, 7.6$  Hz, 1H), 1.92 – 1.72 (m, 4H), 0.95 (s, 9H), 0.93 (s, 9H).

$^{13}\text{C}\{^1\text{H}\}$  NMR (101 MHz,  $\text{CDCl}_3$ )  $\delta$  137.4, 128.7, 128.1, 80.5, 73.9, 73.6, 72.9, 68.3, 27.7, 27.6, 25.9, 25.7, 21.0, 20.8.

IR  $\nu$  3456, 2933, 2857, 1473, 1072, 871, 827, 748, 698, 648  $\text{cm}^{-1}$ .

HRMS (ESI)  $m/z = [\text{M} + \text{Na}^+]$  calculated for  $\text{C}_{21}\text{H}_{36}\text{O}_4\text{SiNa}^+$  403.2281, Found 403.2277 (1.0 ppm error).

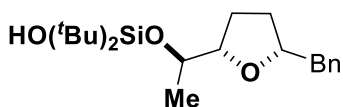

(( $R^*$ )-1-(( $2S^*,5R^*$ )-5-benzyltetrahydrofuran-2-yl)ethoxy)di-*tert*-butylsilanol

**Compound 36:** Synthesized using General Procedure C on a 0.2 mmol scale; Purified using a gradient of 0.1 to 2.0% acetone in  $\text{CH}_2\text{Cl}_2$  on silica gel; single diastereomer; (colorless oil, 43.6 mg, 0.120 mmol, 60% yield).

$^1\text{H}$  NMR (500 MHz,  $\text{CDCl}_3$ )  $\delta$  7.34 – 7.26 (m, 2H), 7.25 – 7.17 (m, 3H), 4.41 (qd,  $J = 6.5, 2.4$  Hz, 1H), 3.99 (dq,  $J = 9.2, 6.6$  Hz, 1H), 3.67 (ddd,  $J = 8.7, 7.2, 2.3$  Hz, 1H), 3.08 (dd,  $J = 13.5, 6.4$  Hz, 1H), 2.78 (dd,  $J = 13.5, 7.1$  Hz, 1H), 2.08 – 1.98 (m, 1H), 1.94 – 1.85 (m, 1H), 1.76 – 1.67 (m, 1H), 1.63 – 1.54 (m, 1H), 1.15 (d,  $J = 6.5$  Hz, 3H), 1.06 (s, 9H), 1.06 (s, 9H).

$^{13}\text{C}\{^1\text{H}\}$  NMR (126 MHz,  $\text{CDCl}_3$ )  $\delta$  138.7, 129.1, 128.6, 126.5, 83.9, 81.0, 67.8, 41.5, 30.6, 27.93, 27.90, 22.7, 21.2, 20.5, 20.3.

IR  $\nu$  3460, 2933, 2857, 1473, 1075, 827, 700, 648  $\text{cm}^{-1}$ .

HRMS (ESI)  $m/z = [\text{M} + \text{Na}^+]$  calculated for  $\text{C}_{21}\text{H}_{36}\text{O}_3\text{SiNa}^+$  387.2331, Found 387.2349 (error 4.6 ppm).

**Compound 38:** Previously characterized in *Org. Lett.* **2022**, *24*, 939–943.

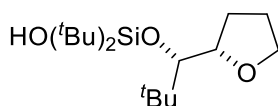

di-*tert*-butyl((*S*<sup>\*</sup>)-2,2-dimethyl-1-((*S*<sup>\*</sup>)-tetrahydrofuran-2-yl)propoxy)silanol

**Compound 40:** Synthesized using General Procedure C on a 0.2 mmol scale; Purified using a gradient of 0.1 to 2.0% acetone in  $\text{CH}_2\text{Cl}_2$  on silica gel; (colorless oil, 38.0 mg, 0.120 mmol, 60% yield).

$^1\text{H}$  NMR (400 MHz,  $\text{CDCl}_3$ )  $\delta$  4.90 (s, 1H), 3.84 – 3.64 (m, 3H), 3.60 (d,  $J = 8.4$  Hz, 1H), 2.06 – 1.85 (m, 3H), 1.59 – 1.44 (m, 1H), 1.04 (s, 9H), 1.01 (s, 9H), 0.98 (s, 9H).

$^{13}\text{C}\{^1\text{H}\}$  NMR (101 MHz,  $\text{CDCl}_3$ )  $\delta$  84.2, 82.7, 66.1, 35.8, 30.1, 28.2, 27.8, 27.4, 26.7, 21.9, 20.8.

IR  $\nu$  3440, 2964, 2933, 2857, 1473, 1115, 879, 827, 647  $\text{cm}^{-1}$ .

HRMS (ESI)  $m/z = [\text{M} + \text{H}^+]$  calculated for  $\text{C}_{17}\text{H}_{37}\text{O}_3\text{Si}^+$  317.2512, Found 317.2505 (2.2 ppm error).

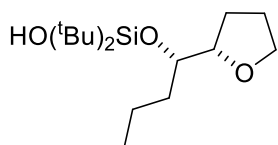

di-*tert*-butyl(1-(tetrahydrofuran-2-yl)butoxy)silanol

**Compound 42:** Synthesized using General Procedure C on a 0.2 mmol scale; Purified using a gradient of 0-3% acetone in  $\text{CH}_2\text{Cl}_2$  on silica gel; single diastereomer; (colorless oil, 45 mg, 0.149 mmol, 74% yield).

$^1\text{H}$  NMR (400 MHz,  $\text{CDCl}_3$ )  $\delta$  3.89 – 3.74 (m, 3H), 3.66 (dd,  $J = 8.3, 5.7$  Hz, 1H), 1.98 – 1.78 (m, 3H), 1.60 – 1.30 (m, 5H), 1.02 (s, 9H), 0.98 (s, 9H), 0.91 (t,  $J = 7.2$  Hz, 3H).



$^{13}\text{C}\{^1\text{H}\}$  (101 MHz,  $\text{CDCl}_3$ )  $\delta$  84.4, 76.4, 67.7, 36.9, 28.5, 27.9, 27.5, 26.0, 21.4, 20.4, 18.3, 14.7.

IR  $\nu$  3453, 2958, 2886, 1386, 1013, 827  $\text{cm}^{-1}$ .

HRMS (ESI-TOF)  $m/z = [\text{M} + \text{Na}^+]$  Calcd  $\text{C}_{16}\text{H}_{34}\text{O}_3\text{SiNa}^+$  325.2175, found 325.2164 (3.4 ppm error).

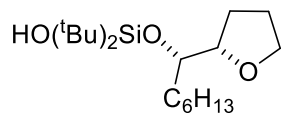

di-*tert*-butyl((1-(heptyloxy)tetrahydrofuran-2-yl)silanol

**Compound 44:** Synthesized using General Procedure C on a 0.2 mmol scale; Purified using a gradient of 0-3% acetone in  $\text{CH}_2\text{Cl}_2$  on silica gel; single diastereomer; (colorless oil, 60 mg, 0.174 mmol, 87% yield).

$^1\text{H}$  NMR (400 MHz,  $\text{CDCl}_3$ )  $\delta$  3.87 – 3.75 (m, 3H), 3.67 (td,  $J = 8.7, 5.5$  Hz, 1H), 1.96 – 1.82 (m, 3H), 1.53 – 1.32 (m, 5H), 1.30 – 1.20 (m, 6H) 1.02 (s, 9H), 0.98 (s, 9H), 0.91 – 0.84 (m, 3H).

$^{13}\text{C}\{^1\text{H}\}$  (101 MHz,  $\text{CDCl}_3$ )  $\delta$  84.3, 76.5, 67.7, 34.5, 31.9, 29.8, 28.5, 27.8, 27.5, 26.0, 24.8, 22.7, 21.4, 20.4, 14.2.

IR  $\nu$  3459, 2954, 2860, 1471, 1012, 827  $\text{cm}^{-1}$ .

HRMS (ESI-TOF)  $m/z = [\text{M} + \text{Na}^+]$  Calcd  $\text{C}_{19}\text{H}_{40}\text{O}_3\text{SiNa}^+$  367.2644, found 367.2628 (4.4 ppm error).

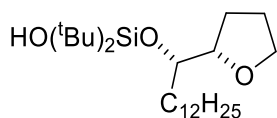

di-*tert*-butyl((1-(tridecyl)oxy)tetrahydrofuran-2-yl)silanol

**Compound 46:** Synthesized using General Procedure C on a 0.2 mmol scale; Purified using a gradient of 0-3% acetone in  $\text{CH}_2\text{Cl}_2$  on silica gel; single diastereomer; (colorless oil, 68.6 mg, 0.160 mmol, 80% yield).

$^1\text{H}$  NMR (400 MHz,  $\text{CDCl}_3$ )  $\delta$  3.88 – 3.74 (m, 3H), 3.67 (td,  $J = 8.6, 5.4$  Hz, 1H), 1.98 – 1.78 (m, 3H), 1.48 – 1.35 (m, 5H), 1.31 – 1.18 (m, 18H), 1.01 (s, 9H), 0.98 (s, 9H), 0.91 – 0.82 (m, 3H).

$^{13}\text{C}\{^1\text{H}\}$  (101 MHz,  $\text{CDCl}_3$ )  $\delta$  84.4, 76.5, 67.7, 34.5, 32.1, 30.1, 29.83, 29.79, 29.72, 29.66, 29.5, 28.5, 27.9, 27.5, 26.0, 24.9, 22.8, 21.4, 20.4, 14.2.

IR  $\nu$  3445, 2941, 1471, 1386, 1013, 827  $\text{cm}^{-1}$ .

HRMS (ESI-TOF)  $m/z = [\text{M} + \text{H}^+]$  Calcd  $\text{C}_{25}\text{H}_{53}\text{O}_3\text{Si}^+$  429.3764, found 429.3770 (1.4 ppm error).

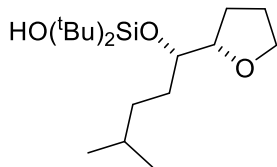

di-*tert*-butyl((4-methyl-1-(tetrahydrofuran-2-yl)pentyl)oxy)silanol

**Compound 48:** Synthesized using General Procedure C on a 0.2 mmol scale; Purified using a gradient of 0-3% acetone in CH<sub>2</sub>Cl<sub>2</sub>; single diastereomer; (colorless oil, 53 mg, 0.160 mmol, 80% yield).

<sup>1</sup>H NMR (400 MHz, CDCl<sub>3</sub>) δ 3.89 – 3.74 (m, 3H), 3.70 – 3.64 (m, 1H), 1.98 – 1.78 (m, 3H), 1.58 – 1.29 (m, 6H), 1.02 (s, 9H), 0.99 (s, 9H), 0.88 (d, *J* = 3.6 Hz, 3H), 0.87 (d, *J* = 3.7 Hz, 3H).

<sup>13</sup>C{<sup>1</sup>H} (101 MHz, CDCl<sub>3</sub>) δ 84.3, 76.5, 67.7, 33.9, 32.2, 28.4, 28.3, 27.9, 27.5, 26.0, 22.9, 22.5, 21.4, 20.4.

IR ν 3443, 2931, 2857, 1471, 1386, 1013, 827 cm<sup>-1</sup>.

HRMS (ESI-TOF) *m/z* = [M + Na<sup>+</sup>] Calcd C<sub>18</sub>H<sub>38</sub>O<sub>3</sub>SiNa<sup>+</sup> 353.2488, found 353.2487 (0.3 ppm error).

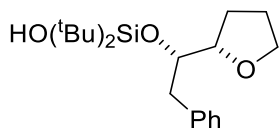

di-*tert*-butyl(2-phenyl-1-tetrahydrofuran-2-yl)ethoxy)silanol

**Compound 50:** Synthesized using General Procedure C on a 0.2 mmol scale; Purified using a gradient of 0-3% acetone in CH<sub>2</sub>Cl<sub>2</sub> on silica gel; single diastereomer; (colorless oil, 53 mg, 0.15 mmol, 75% yield).

<sup>1</sup>H NMR (400 MHz, CDCl<sub>3</sub>) δ 7.25 – 7.15 (m, 5H), 4.04 (td, *J* = 8.0, 3.4 Hz, 1H), 3.93 – 3.76 (m, 2H), 3.69 (ddd, *J* = 9.5, 8.1, 6.0 Hz, 1H), 2.86 (dd, *J* = 13.5, 3.4 Hz, 1H), 2.61 (dd, *J* = 13.5, 8.0 Hz, 1H), 2.09 – 1.82 (m, 3H), 1.54 (dq, *J* = 11.9, 9.2 Hz, 1H), 0.99 (s, 9H), 0.77 (s, 9H).

<sup>13</sup>C{<sup>1</sup>H} (101 MHz, CDCl<sub>3</sub>) δ 138.2, 130.3, 128.1, 126.3, 84.0, 77.5, 67.8, 40.8, 28.6, 27.5, 27.4, 26.0, 21.0, 20.4.

IR ν 3440, 2964, 2859, 1471, 1386, 1012, 827 cm<sup>-1</sup>.

HRMS (ESI-TOF) *m/z* = [M + Na<sup>+</sup>] Calcd C<sub>20</sub>H<sub>34</sub>O<sub>3</sub>SiNa<sup>+</sup> 373.2175, found 373.2177 (0.5 ppm error).

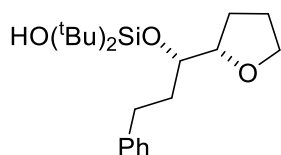

di-*tert*-butyl(3-phenyl-1-(tetrahydrofuran-2-yl)propoxy)silanol

**Compound 52:** Synthesized using General Procedure C on a 0.2 mmol scale; Purified using a gradient of 0-3% acetone in CH<sub>2</sub>Cl<sub>2</sub> on silica gel; single diastereomer; (colorless oil, 59 mg, 0.162 mmol, 81% yield).

<sup>1</sup>H NMR (400 MHz, CDCl<sub>3</sub>) δ 7.42 – 7.09 (m, 5H), 3.99 (td, J = 7.8, 3.3 Hz, 1H), 3.96 – 3.88 (m, 2H), 3.85 – 3.79 (m, 1H), 2.95 (ddd, J = 13.7, 11.7, 5.3 Hz, 1H), 2.81 (ddd, J = 13.6, 11.6, 5.2 Hz, 1H), 2.04 – 1.72 (m, 5H), 1.54 – 1.45 (m, 1H), 1.14 (s, 9H), 1.12 (s, 9H).

<sup>13</sup>C{<sup>1</sup>H} (101 MHz, CDCl<sub>3</sub>) δ 142.8, 128.54, 128.46, 125.9, 84.1, 76.3, 67.8, 36.8, 31.5, 28.4, 27.9, 27.6, 26.0, 21.4, 20.5.

IR v 3445, 2957, 1471, 1386, 1013, 827 cm<sup>-1</sup>.

HRMS (ESI-TOF) m/z = [M + Na<sup>+</sup>] Calcd C<sub>21</sub>H<sub>36</sub>O<sub>3</sub>SiNa<sup>+</sup> 387.2331, found 387.2327 (1.0 ppm error).

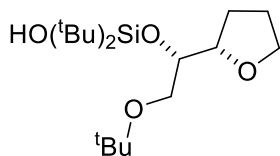

(2-(*tert*-butoxy)-1-(tetrahydrofuran-2-yl)ethoxy)di-*tert*-butylsilanol

**Compound 54:** Synthesized using General Procedure C on a 0.2 mmol scale; Purified using a gradient of 0-3% acetone in CH<sub>2</sub>Cl<sub>2</sub> on silica gel; single diastereomer; (colorless oil, 59 mg, 0.170 mmol, 85% yield).

<sup>1</sup>H NMR (400 MHz, CDCl<sub>3</sub>) δ 4.04 (ddd, J = 6.8, 4.6, 3.3 Hz, 1H), 3.90 (td, J = 7.0, 4.6 Hz, 1H), 3.85 – 3.73 (m, 2H), 3.47 – 3.43 (m, 2H), 1.97 – 1.77 (m, 4H), 1.21 (s, 9H), 1.02 (s, 9H), 1.00 (s, 9H).

<sup>13</sup>C{<sup>1</sup>H} (101 MHz, CDCl<sub>3</sub>) δ 81.2, 75.3, 74.2, 68.6, 65.0, 27.7, 27.6, 27.5, 27.4, 26.2, 21.2, 20.6.

IR v 3419, 2965, 2859, 1473, 1363, 1013, 827 cm<sup>-1</sup>.

HRMS (ESI-TOF) m/z = [M + H<sup>+</sup>] Calcd C<sub>18</sub>H<sub>39</sub>O<sub>4</sub>Si<sup>+</sup> 347.2618, found 347.2634 (4.6 ppm error).

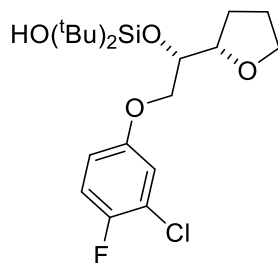

di-*tert*-butyl(2-(3-chloro-4-fluorophenoxy)-1-tetrahydrofuran-2-yl)ethoxy)silanol

**Compound 56:** Synthesized using General Procedure C on a 0.2 mmol scale; Purified using a gradient of 0-3% acetone in CH<sub>2</sub>Cl<sub>2</sub> on silica gel; single diastereomer; (colorless oil, 54 mg, 0.129 mmol, 64% yield).

<sup>1</sup>H NMR (400 MHz, CDCl<sub>3</sub>) δ 7.08 – 6.92 (m, 2H), 6.77 (dt, J = 9.0, 3.3 Hz, 1H), 4.20 (ddd, J = 7.2, 5.3, 4.1 Hz, 1H), 4.02 – 3.92 (m, 2H), 3.91 – 3.79 (m, 3H), 2.04 – 1.84 (m, 3H), 1.73 – 1.59 (m, 1H), 1.03 (s, 9H), 1.00 (s, 9H).

<sup>13</sup>C{<sup>1</sup>H} (101 MHz, CDCl<sub>3</sub>) δ 155.2 (d, J = 2.8 Hz), 153.1 (d, J = 241.7 Hz), 121.3 (d, J = 19.2 Hz), 116.9 (d, J = 22.2 Hz), 116.4, 114.4 (d, J = 6.6 Hz), 81.8, 74.8, 71.6, 68.0, 27.8, 27.6, 27.4, 26.1, 21.0, 20.6.

<sup>19</sup>F NMR (377 MHz, CDCl<sub>3</sub>) δ -126.7 (t, J = 9.2 Hz).

IR ν 2933, 2859, 1558, 1473, 1203, 1072, 827 cm<sup>-1</sup>.

HRMS (ESI-TOF) m/z = [M + Na<sup>+</sup>] Calcd C<sub>20</sub>H<sub>32</sub>FCIO<sub>4</sub>SiNa<sup>+</sup> 441.1640, found 441.1659 (4.3 ppm error).

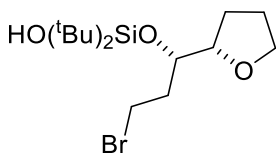

((3-bromo-1-tetrahydrofuran-2-yl)propoxy)di-*tert*-butylsilanol

**Compound 58:** Synthesized using General Procedure C on a 0.2 mmol scale; Purified using a gradient of 0-3% acetone in CH<sub>2</sub>Cl<sub>2</sub> on silica gel; single diastereomer; (colorless oil, 47 mg, 0.128 mmol, 64% yield).

<sup>1</sup>H NMR (400 MHz, CDCl<sub>3</sub>) δ 3.96 (td, J = 7.8, 3.9 Hz, 1H), 3.91 – 3.78 (m, 2H), 3.75 – 3.70 (m, 1H), 3.61 – 3.50 (m, 2H), 2.06 – 1.81 (m, 5H), 1.51 – 1.36 (m, 1H), 1.04 (s, 9H), 0.98 (s, 9H).

<sup>13</sup>C{<sup>1</sup>H} (101 MHz, CDCl<sub>3</sub>) δ 83.7, 75.2, 68.0, 38.2, 29.8, 28.5, 27.9, 27.5, 25.9, 21.4, 20.4.

IR ν 3427, 2964, 2859, 1471, 1386, 1013, 827 cm<sup>-1</sup>.

HRMS (ESI-TOF) m/z = [M + Na<sup>+</sup>] Calcd C<sub>15</sub>H<sub>31</sub>BrO<sub>3</sub>SiNa<sup>+</sup> 389.1124, found 389.1136 (3.1 ppm error).

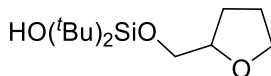

di-*tert*-butyl((tetrahydrofuran-2-yl)methoxy)silanol

**Compound 60:** Synthesized using General Procedure C on a 0.2 mmol scale; Purified using a gradient of 0.1 to 2.0% acetone in CH<sub>2</sub>Cl<sub>2</sub> on silica gel; (colorless oil, 31.3 mg, 0.120 mmol, 60% yield).

<sup>1</sup>H NMR (400 MHz, CDCl<sub>3</sub>) δ 3.96 (ddt, *J* = 11.0, 6.3, 3.0 Hz, 1H), 3.91 – 3.84 (m, 2H), 3.82 – 3.76 (m, 2H), 1.98 – 1.79 (m, 3H), 1.68 – 1.54 (m, 1H), 1.01 (s, 9H), 1.01 (s, 9H).

<sup>13</sup>C{<sup>1</sup>H} NMR (101 MHz, CDCl<sub>3</sub>) δ 80.7, 68.3, 66.1, 27.6, 27.5, 27.0, 25.8, 20.9, 20.6.

IR ν 3410, 2933, 2859, 1473, 1078, 862, 827, 648 cm<sup>-1</sup>.

HRMS (ESI) *m/z* = [M + Na<sup>+</sup>] calculated for C<sub>13</sub>H<sub>28</sub>O<sub>3</sub>SiNa<sup>+</sup> 283.1705, Found 283.1705 (0.0 ppm error).

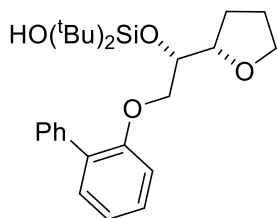

(2-([1,1'-biphenyl]-2-yloxy)-1-(tetrahydrofuran-2-yl)ethoxy)di-*tert*-butylsilanol

**Compound 62:** Synthesized using General Procedure C on a 0.2 mmol scale; Purified using a gradient of 0-3% acetone in CH<sub>2</sub>Cl<sub>2</sub> on silica gel; single diastereomer; (colorless oil, 44 mg, 0.099 mmol, 50% yield).

<sup>1</sup>H NMR (400 MHz, CDCl<sub>3</sub>) δ 7.57 – 7.50 (m, 2H), 7.43 – 7.25 (m, 5H), 7.10 – 6.98 (m, 2H), 4.11 – 3.98 (m, 3H), 3.85 – 3.68 (m, 3H), 1.87 – 1.65 (m, 3H), 1.49 – 1.26 (m, 1H), 0.99 (s, 18H).

<sup>13</sup>C{<sup>1</sup>H} (101 MHz, CDCl<sub>3</sub>) δ 156.0, 138.5, 131.4, 131.0, 129.8, 128.7, 128.0, 127.0, 121.4, 112.9, 82.2, 75.1, 71.7, 67.7, 27.7, 27.5, 27.4, 26.0, 21.0, 20.5.

IR ν 3649, 2965, 1505, 1473, 1233, 1009, 827 cm<sup>-1</sup>.

HRMS (ESI-TOF) *m/z* = [M + Na<sup>+</sup>] Calcd C<sub>26</sub>H<sub>38</sub>O<sub>4</sub>SiNa<sup>+</sup> 465.2437, found 465.2429 (1.7 ppm error).

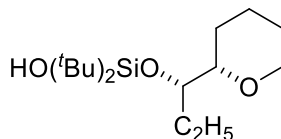

**Compound 64:** Synthesized using General Procedure C on a 0.2 mmol scale; Purified using a gradient of 1-4% diethyl ether in hexane on silica gel; (colorless oil, 6.0 mg, 0.02 mmol, 10% yield).

$^1\text{H}$  NMR (400 MHz,  $\text{CDCl}_3$ )  $\delta$  4.37 (s, 1H), 4.01 (ddt,  $J = 11.4, 4.4, 1.8$  Hz, 1H), 3.79 (ddd,  $J = 7.9, 5.5, 4.0$  Hz, 1H), 3.38 (td,  $J = 11.6, 2.5$  Hz, 1H), 3.19 (ddd,  $J = 11.4, 7.9, 2.0$  Hz, 1H), 1.89 – 1.82 (m, 1H), 1.65 – 1.39 (m, 6H), 1.24 – 1.14 (m, 1H), 1.02 (s, 9H), 0.98 (s, 9H), 0.94 (t,  $J = 7.4$  Hz, 3H).

$^{13}\text{C}\{^1\text{H}\}$  NMR (126 MHz,  $\text{CDCl}_3$ )  $\delta$  82.4, 75.8, 68.5, 27.7, 27.6, 27.4, 25.9, 25.7, 23.4, 21.2, 20.5, 8.4.

IR  $\nu$  3447, 2933, 2856, 1473, 1080, 878, 827, 647  $\text{cm}^{-1}$ .

HRMS (ESI)  $m/z = [\text{M} + \text{H}^+]$  calculated for  $\text{C}_{16}\text{H}_{35}\text{O}_3\text{Si}^+$  303.2355, Found 303.2343 (error 4.0 ppm).

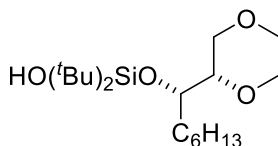

((( $S^*$ )-1-(( $S^*$ )-1,4-dioxan-2-yl)heptyl)oxy)di-*tert*-butylsilanol

**Compound 66:** Synthesized using General Procedure C on a 0.2 mmol scale.; Purified using a gradient of 1-4% diethyl ether in hexane on silica gel; single diastereomer; (colorless oil, 11.0 mg, 0.030 mmol, 15% yield).

$^1\text{H}$  NMR (400 MHz,  $\text{CDCl}_3$ )  $\delta$  3.89 – 3.79 (m, 3H), 3.77 – 3.67 (m, 3H), 3.60 (dd,  $J = 11.9, 2.7$  Hz, 1H), 3.56 – 3.49 (m, 1H), 3.30 (dd,  $J = 11.3, 10.4$  Hz, 1H), 1.50 – 1.41 (m, 2H), 1.32 – 1.23 (m, 8H), 1.02 (s, 9H), 0.99 (s, 9H), 0.90 – 0.86 (m, 3H).

$^{13}\text{C}\{^1\text{H}\}$  NMR (101 MHz,  $\text{CDCl}_3$ )  $\delta$  80.0, 72.6, 67.8, 67.0, 66.2, 33.0, 31.8, 29.8, 27.7, 27.4, 23.9, 22.7, 21.1, 20.5, 14.2.

IR  $\nu$  3490, 2931, 2857, 1473, 1127, 827, 647  $\text{cm}^{-1}$ .

HRMS (ESI)  $m/z = [\text{M} + \text{Na}^+]$  calculated for  $\text{C}_{19}\text{H}_{40}\text{O}_4\text{SiNa}^+$  383.2594, Found 383.2596 (0.5 ppm error).

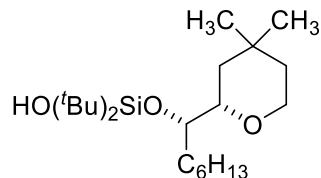

**Compound 68:** Synthesized using General Procedure C on a 0.2 mmol scale; Purified using a gradient of 1-4% diethyl ether in hexane on silica gel; single diastereomer; (colorless oil, 54.1 mg, 0.140 mmol, 70% yield).

$^1\text{H}$  NMR (500 MHz,  $\text{CDCl}_3$ )  $\delta$  3.85 (ddd,  $J = 11.5, 5.1, 1.5$  Hz, 1H), 3.79 (ddd,  $J = 7.8, 5.4, 3.6$  Hz, 1H), 3.52 (ddd,  $J = 13.0, 11.7, 2.2$  Hz, 1H), 3.31 (ddd,  $J = 11.9, 7.9, 2.0$  Hz, 1H), 1.54 – 1.38 (m, 4H), 1.38 – 1.17 (m, 10H), 1.01 (s, 9H), 1.00 (s, 3H), 0.98 (s, 9H), 0.96 (s, 3H), 0.90 – 0.87 (m, 3H).

$^{13}\text{C}\{^1\text{H}\}$  NMR (126 MHz,  $\text{CDCl}_3$ )  $\delta$  78.3, 75.7, 64.3, 40.7, 38.5, 33.4, 33.2, 31.9, 30.0, 28.8, 27.7, 27.5, 24.2, 23.7, 22.8, 21.2, 20.5, 14.2.

IR  $\nu$  3462, 2954, 2931, 2857, 1471, 1102, 1060, 871, 827, 647  $\text{cm}^{-1}$ .

HRMS (ESI)  $m/z$ :  $[\text{M} + \text{Na}^+]$  calculated for  $\text{C}_{22}\text{H}_{46}\text{O}_3\text{SiNa}^+$  409.3114, Found 409.3136 (error 5.4 ppm).

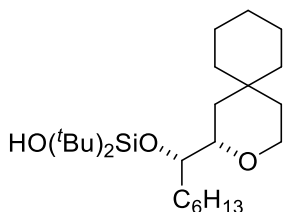

(((*S*<sup>\*</sup>)-1-((*S*<sup>\*</sup>)-3-oxaspiro[5.5]undecan-2-yl)heptyl)oxy)di-*tert*-butylsilanol

**Compound 70:** Synthesized using General Procedure C on a 0.2 mmol scale; Purified using a gradient of 1-4% diethyl ether in hexane on silica gel; single diastereomer; (colorless oil, 70.0 mg, 0.164 mmol, 82% yield).

$^1\text{H}$  NMR (400 MHz,  $\text{CDCl}_3$ )  $\delta$  4.33 (s, 1H), 3.85 – 3.75 (m, 2H), 3.54 (ddd,  $J = 13.8, 11.5, 2.2$  Hz, 1H), 3.34 (ddd,  $J = 11.9, 7.8, 1.8$  Hz, 1H), 1.61 – 1.36 (m, 14H), 1.35 – 1.23 (m, 10H), 1.01 (s, 9H), 0.98 (s, 9H), 0.89 (t,  $J = 6.6$  Hz, 3H).

$^{13}\text{C}\{^1\text{H}\}$  NMR (101 MHz,  $\text{CDCl}_3$ )  $\delta$  77.4, 75.7, 63.7, 42.3, 38.8, 36.0, 33.3, 32.0, 31.9, 31.3, 30.0, 27.7, 27.5, 26.8, 23.7, 22.7, 21.6, 21.4, 21.2, 20.5, 14.2.

IR  $\nu$  3446, 2928, 2856, 1471, 1107, 1093, 827, 647  $\text{cm}^{-1}$ .

HRMS (ESI)  $m/z$ :  $[\text{M} + \text{H}^+]$  calculated for  $\text{C}_{25}\text{H}_{51}\text{O}_3\text{Si}^+$  427.3607, Found 427.3639 (7.5 ppm error).

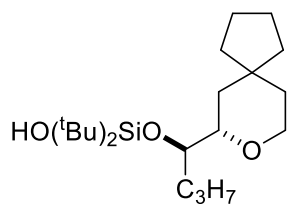

(oxaspiro[4.5]decan-7-yl)butoxydi-*tert*-butylsilanol

**Compound 72:** Synthesized using General Procedure C on a 0.2 mmol scale; Purified using a gradient of 0-3% acetone in CH<sub>2</sub>Cl<sub>2</sub> on silica gel; single diastereomer; (colorless oil, 37 mg, 0.100 mmol, 50% yield).

<sup>1</sup>H NMR (400 MHz, CDCl<sub>3</sub>) δ 4.19 (td, J = 6.7, 2.2 Hz, 1H), 3.96 (ddd, J = 11.5, 4.9, 1.5 Hz, 1H), 3.60 (ddd, J = 13.6, 11.6, 2.1 Hz, 1H), 3.35 (dt, J = 11.8, 2.1 Hz, 1H), 1.83 – 1.22 (m, 16H), 1.06 (s, 9H), 1.05 (s, 9H), 0.98 – 0.93 (m, 3H).

<sup>13</sup>C{<sup>1</sup>H} (101 MHz, CDCl<sub>3</sub>) δ 77.9, 74.5, 66.0, 42.8, 40.4, 37.7, 36.3, 34.6 (2C), 28.0, 27.9, 25.0, 23.8, 21.5, 20.6, 19.5, 14.5.

IR v 3443, 2941, 2864, 1471, 1387, 1062, 827 cm<sup>-1</sup>.

HRMS (ESI-TOF) m/z = [M + Na<sup>+</sup>] Calcd C<sub>21</sub>H<sub>42</sub>O<sub>3</sub>SiNa<sup>+</sup> 393.2801, found 393.2809 (2.0 ppm error).

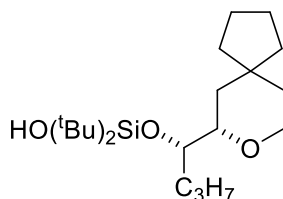

(oxaspiro[4.5]decan-7-yl)butoxydi-*tert*-butylsilanol

**Compound 74:** Synthesized using General Procedure C on a 0.2 mmol scale; Purified using a gradient of 0-3% acetone in CH<sub>2</sub>Cl<sub>2</sub> on silica gel; single diastereomer; (colorless oil, 49 mg, 0.132 mmol, 66% yield).

<sup>1</sup>H NMR (400 MHz, CDCl<sub>3</sub>) δ 3.90 (ddd, J = 11.4, 4.9, 1.5 Hz, 1H), 3.81 (ddd, J = 7.8, 5.6, 3.5 Hz, 1H), 3.45 (ddd, J = 12.9, 11.5, 2.1 Hz, 1H), 3.24 (ddd, J = 11.8, 7.8, 2.0 Hz, 1H), 1.71 – 1.25 (m, 16H), 1.00 (s, 9H), 0.97 (s, 9H), 0.91 (t, J = 7.0 Hz, 3H).

<sup>13</sup>C{<sup>1</sup>H} (101 MHz, CDCl<sub>3</sub>) 79.8, 75.5, 65.6, 42.7, 40.8, 39.8, 37.5, 35.7, 34.7, 27.7, 27.5, 24.9, 23.8, 21.2, 20.5, 17.3, 14.9.

IR v 3445, 2954, 2857, 1471, 1386, 1097, 827 cm<sup>-1</sup>.

HRMS (ESI-TOF) m/z = [M + H<sup>+</sup>] Calcd C<sub>21</sub>H<sub>43</sub>O<sub>3</sub>Si<sup>+</sup> 371.2981, found 371.2963 (4.9 ppm error).



## IX. X-ray Crystallography

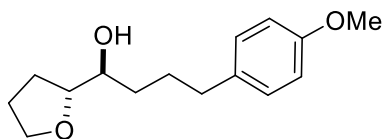

CCDC 2233482

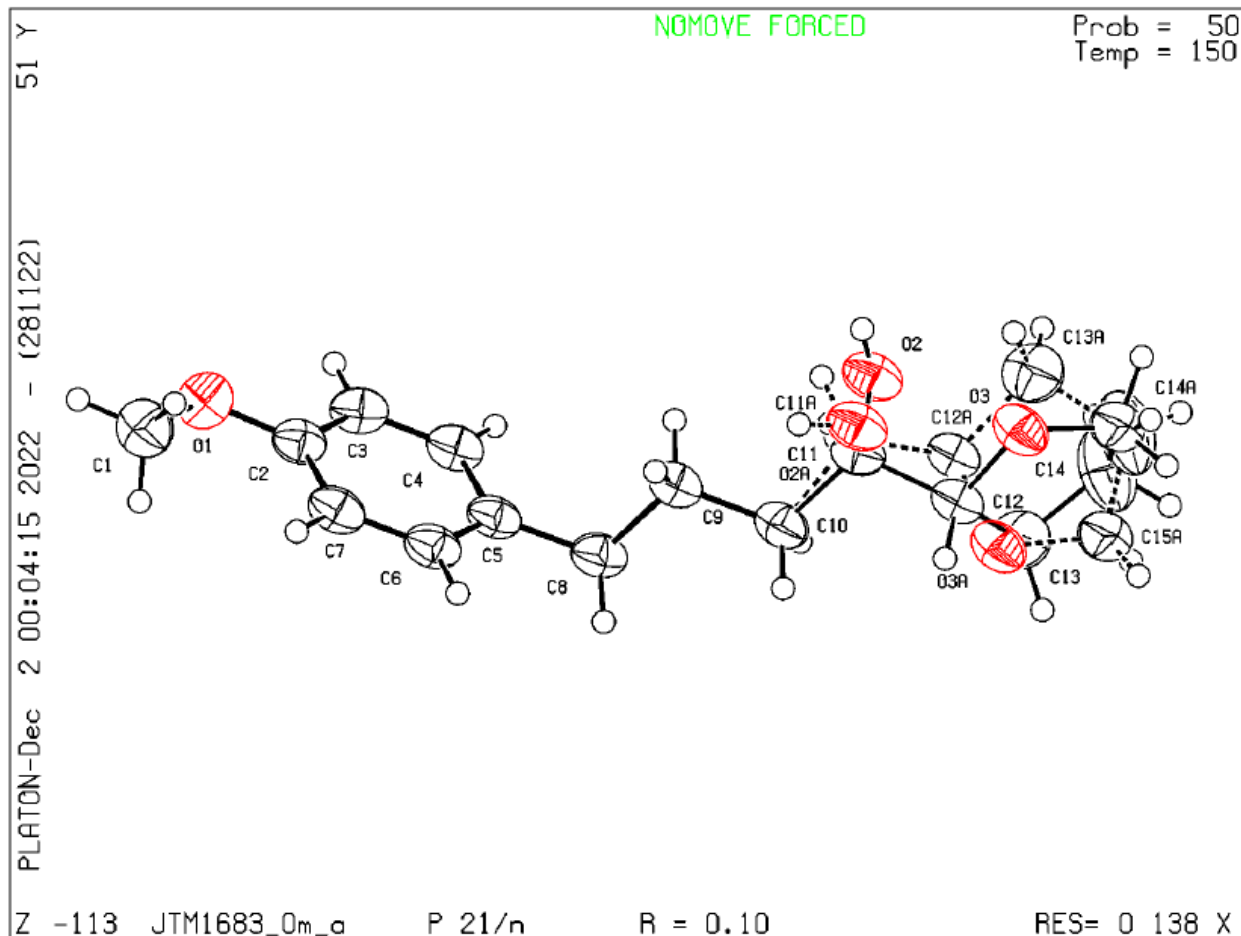

Crystals grown from ethanol.

## Crystal Structure Report for **JTM1683**

A colorless, plate-like specimen of  $C_{15}H_{22}O_3$ , approximate dimensions 0.112 mm x 0.188 mm x 0.272 mm, was used for the X-ray crystallographic analysis. The X-ray intensity data were measured on a Bruker D8 VENTURE PHOTON 3 CPAD

system equipped with a INCOATEC I $\mu$ S micro--focus source (Cu-K $\alpha$ ,  $\lambda = 1.54178$  Å) and a mirror monochromator.

**Table 1: Data collection details for JTM1683.**

| Axi<br>s  | dx/<br>mm  | 2 $\theta$ / $^{\circ}$ | $\omega$ / $^{\circ}$ | $\phi$ / $^{\circ}$ | $\chi$ / $^{\circ}$ | Widt<br>h/ $^{\circ}$ | Fra<br>mes | Tim<br>e/s | Wavelen<br>gth/Å | Voltag<br>e/kV | Curren<br>t/mA | Temperat<br>ure/K |
|-----------|------------|-------------------------|-----------------------|---------------------|---------------------|-----------------------|------------|------------|------------------|----------------|----------------|-------------------|
| Om<br>ega | 44.9<br>70 | 110.<br>11              | -<br>67.7<br>0        | 96.0<br>0           | 54.<br>76           | 0.50                  | 352        | 15.0<br>0  | 1.54184          | 50             | 1.0            | n/a               |
| Om<br>ega | 44.9<br>70 | 110.<br>11              | -<br>67.7<br>0        | -<br>136.<br>00     | 54.<br>76           | 0.50                  | 352        | 15.0<br>0  | 1.54184          | 50             | 1.0            | n/a               |
| Om<br>ega | 44.9<br>70 | 45.1<br>9               | 43.3<br>8             | 0.00                | 54.<br>76           | 0.50                  | 352        | 5.00       | 1.54184          | 50             | 1.0            | n/a               |
| Om<br>ega | 44.9<br>70 | 110.<br>11              | -<br>67.7<br>0        | 32.0<br>0           | 54.<br>76           | 0.50                  | 352        | 15.0<br>0  | 1.54184          | 50             | 1.0            | n/a               |
| Om<br>ega | 44.9<br>70 | 80.1<br>1               | -<br>97.7<br>0        | 180.<br>00          | 54.<br>76           | 0.50                  | 352        | 8.40       | 1.54184          | 50             | 1.0            | n/a               |
| Om<br>ega | 44.9<br>70 | 110.<br>11              | -<br>67.7<br>0        | 128.<br>00          | 54.<br>76           | 0.50                  | 352        | 15.0<br>0  | 1.54184          | 50             | 1.0            | n/a               |
| Om<br>ega | 44.9<br>70 | 110.<br>11              | -<br>67.7<br>0        | -<br>168.<br>00     | 54.<br>76           | 0.50                  | 352        | 15.0<br>0  | 1.54184          | 50             | 1.0            | n/a               |
| Om<br>ega | 44.9<br>70 | 110.<br>11              | -<br>67.7<br>0        | 64.0<br>0           | 54.<br>76           | 0.50                  | 352        | 15.0<br>0  | 1.54184          | 50             | 1.0            | n/a               |
| Om<br>ega | 44.9<br>70 | 110.<br>11              | -<br>67.7<br>0        | 160.<br>00          | 54.<br>76           | 0.50                  | 352        | 15.0<br>0  | 1.54184          | 50             | 1.0            | n/a               |
| Phi<br>70 | 44.9<br>70 | 50.1<br>1               | -<br>128.<br>07       | 0.00                | 54.<br>76           | 0.50                  | 720        | 5.30       | 1.54184          | 50             | 1.0            | n/a               |
| Phi<br>70 | 44.9<br>70 | 95.1<br>1               | -<br>83.0<br>7        | 0.00                | 54.<br>76           | 0.50                  | 720        | 11.2<br>0  | 1.54184          | 50             | 1.0            | n/a               |

| Axi<br>s  | dx/<br>mm  | 2 $\theta$ / $^\circ$ | $\omega$ / $^\circ$ | $\varphi$ / $^\circ$ | $\chi$ / $^\circ$ | Widt<br>h/ $^\circ$ | Fra<br>mes | Tim<br>e/s | Wavelen<br>gth/ $\text{\AA}$ | Voltag<br>e/kV | Curren<br>t/mA | Temperat<br>ure/K |
|-----------|------------|-----------------------|---------------------|----------------------|-------------------|---------------------|------------|------------|------------------------------|----------------|----------------|-------------------|
| Om<br>ega | 44.9<br>70 | 110.<br>11            | -<br>67.7<br>0      | 0.00                 | 54.<br>76         | 0.50                | 352        | 15.0<br>0  | 1.54184                      | 50             | 1.0            | n/a               |
| Om<br>ega | 44.9<br>70 | 110.<br>11            | -<br>67.7<br>0      | -<br>40.0<br>0       | 54.<br>76         | 0.50                | 352        | 15.0<br>0  | 1.54184                      | 50             | 1.0            | n/a               |
| Om<br>ega | 44.9<br>70 | 65.1<br>1             | 63.3<br>0           | 90.0<br>0            | 54.<br>76         | 0.50                | 352        | 6.50       | 1.54184                      | 50             | 1.0            | n/a               |

A total of 5664 frames were collected. The total exposure time was 18.45 hours. The frames were integrated with the Bruker SAINT software package using a narrow-frame algorithm. The integration of the data using a [monoclinic](#) unit cell yielded a total of [22882](#) reflections to a maximum  $\theta$  angle of [72.50 \$^\circ\$](#)  ([0.81](#)  $\text{\AA}$  resolution), of which [2709](#) were independent (average redundancy [8.447](#), completeness = [99.0%](#),  $R_{\text{int}} = \text{5.56}\%$ ,  $R_{\text{sig}} = \text{3.19}\%$ ) and [2427](#) ([89.59%](#)) were greater than  $2\sigma(F^2)$ . The final cell constants of  $\underline{a} = \text{8.6600(5)}$   $\text{\AA}$ ,  $\underline{b} = \text{5.9392(3)}$   $\text{\AA}$ ,  $\underline{c} = \text{26.8603(14)}$   $\text{\AA}$ ,  $\beta = \text{93.256(3)}^\circ$ , volume = [1379.29\(13\)](#)  $\text{\AA}^3$ , are based upon the refinement of the XYZ-centroids of [9658](#) reflections above  $20\sigma(I)$  with  $\text{6.592}^\circ < 2\theta < \text{144.6}^\circ$ . Data were corrected for absorption effects using the multi-scan method (SADABS). The ratio of minimum to maximum apparent transmission was [0.819](#). The calculated minimum and maximum transmission coefficients (based on crystal size) are [0.8410](#) and [0.9300](#).

The structure was solved and refined using the Bruker SHELXTL Software Package, using the space group [P 1 21/n 1](#), with  $Z = 4$  for the formula unit,  $\text{C}_{15}\text{H}_{22}\text{O}_3$ . The final anisotropic full-matrix least-squares refinement on  $F^2$  with [190](#) variables converged at  $R1 = \text{9.70}\%$ , for the observed data and  $wR2 = \text{25.52}\%$  for all data. The goodness-of-fit was [1.051](#). The largest peak in the final difference electron density synthesis was [0.873](#)  $e^-/\text{\AA}^3$  and the largest hole was [-0.484](#)  $e^-/\text{\AA}^3$  with an RMS deviation of [0.064](#)  $e^-/\text{\AA}^3$ . On the basis of the final model, the calculated density was [1.205](#)  $\text{g/cm}^3$  and  $F(000)$ , [544](#)  $e^-$ .

**Table 2. Sample and crystal data for JTM1683.**

|                     |                                        |
|---------------------|----------------------------------------|
| Identification code | JTM1683                                |
| Chemical formula    | $\text{C}_{15}\text{H}_{22}\text{O}_3$ |
| Formula weight      | 250.32 g/mol                           |
| Temperature         | 150(2) K                               |

|                               |                            |                           |
|-------------------------------|----------------------------|---------------------------|
| <b>Wavelength</b>             | 1.54178 Å                  |                           |
| <b>Crystal size</b>           | 0.112 x 0.188 x 0.272 mm   |                           |
| <b>Crystal habit</b>          | colorless plate            |                           |
| <b>Crystal system</b>         | monoclinic                 |                           |
| <b>Space group</b>            | P 1 21/n 1                 |                           |
| <b>Unit cell dimensions</b>   | a = 8.6600(5) Å            | $\alpha = 90^\circ$       |
|                               | b = 5.9392(3) Å            | $\beta = 93.256(3)^\circ$ |
|                               | c = 26.8603(14) Å          | $\gamma = 90^\circ$       |
| <b>Volume</b>                 | 1379.29(13) Å <sup>3</sup> |                           |
| <b>Z</b>                      | 4                          |                           |
| <b>Density (calculated)</b>   | 1.205 g/cm <sup>3</sup>    |                           |
| <b>Absorption coefficient</b> | 0.660 mm <sup>-1</sup>     |                           |
| <b>F(000)</b>                 | 544                        |                           |

### **Table 3. Data collection and structure refinement for JTM1683.**

|                                            |                                                                                   |
|--------------------------------------------|-----------------------------------------------------------------------------------|
| <b>Diffractometer</b>                      | Bruker D8 VENTURE PHOTON 3<br>CPAD                                                |
| <b>Radiation source</b>                    | INCOATEC I $\mu$ S micro--focus source<br>(Cu-K $\alpha$ , $\lambda = 1.54178$ Å) |
| <b>Theta range for data collection</b>     | 3.30 to 72.50°                                                                    |
| <b>Index ranges</b>                        | -10 $\leq$ h $\leq$ 10, -7 $\leq$ k $\leq$ 7, -33 $\leq$ l $\leq$ 32              |
| <b>Reflections collected</b>               | 22882                                                                             |
| <b>Independent reflections</b>             | 2709 [R(int) = 0.0556]                                                            |
| <b>Coverage of independent reflections</b> | 99.0%                                                                             |
| <b>Absorption correction</b>               | multi-scan                                                                        |
| <b>Max. and min. transmission</b>          | 0.9300 and 0.8410                                                                 |

|                                            |                                                                                         |
|--------------------------------------------|-----------------------------------------------------------------------------------------|
| <b>Structure solution technique</b>        | direct methods                                                                          |
| <b>Structure solution program</b>          | <i>SHELXT</i> (Sheldrick, 2015a)                                                        |
| <b>Refinement method</b>                   | Full-matrix least-squares on $F^2$                                                      |
| <b>Refinement program</b>                  | <i>SHELXL</i> (Sheldrick, 2015b)                                                        |
| <b>Function minimized</b>                  | $\Sigma w(F_o^2 - F_c^2)^2$                                                             |
| <b>Data / restraints / parameters</b>      | 2709 / 65 / 190                                                                         |
| <b>Goodness-of-fit on <math>F^2</math></b> | 1.051                                                                                   |
| <b>Final R indices</b>                     | 2427 data; $I > 2\sigma(I)$ R1 = 0.0970, wR2 = 0.2500                                   |
|                                            | all data R1 = 0.1036, wR2 = 0.2552                                                      |
| <b>Weighting scheme</b>                    | $w = 1 / [\sigma^2(F_o^2) + (0.1106P)^2 + 2.3061P]$<br>where $P = (F_o^2 + 2F_c^2) / 3$ |
| <b>Largest diff. peak and hole</b>         | 0.873 and -0.484 eÅ <sup>-3</sup>                                                       |
| <b>R.M.S. deviation from mean</b>          | 0.064 eÅ <sup>-3</sup>                                                                  |

**Table 4. Atomic coordinates and equivalent isotropic atomic displacement parameters (Å<sup>2</sup>) for JTM1683.**

U(eq) is defined as one third of the trace of the orthogonalized  $U_{ij}$  tensor.

|    | <b>x/a</b> | <b>y/b</b> | <b>z/c</b> | <b>U(eq)</b> |
|----|------------|------------|------------|--------------|
| O1 | 0.6271(3)  | 0.1831(4)  | 0.81928(8) | 0.0529(6)    |

|      | <b>x/a</b> | <b>y/b</b> | <b>z/c</b>  | <b>U(eq)</b> |
|------|------------|------------|-------------|--------------|
| C1   | 0.7245(4)  | 0.9928(7)  | 0.82238(15) | 0.0591(9)    |
| C2   | 0.5424(3)  | 0.2152(5)  | 0.77488(11) | 0.0423(7)    |
| C3   | 0.4513(4)  | 0.4079(5)  | 0.77173(12) | 0.0455(7)    |
| C4   | 0.3610(4)  | 0.4549(5)  | 0.72875(12) | 0.0447(7)    |
| C5   | 0.3587(3)  | 0.3114(5)  | 0.68757(11) | 0.0427(7)    |
| C6   | 0.4512(4)  | 0.1201(5)  | 0.69169(12) | 0.0466(8)    |
| C7   | 0.5428(4)  | 0.0700(5)  | 0.73434(12) | 0.0462(7)    |
| C8   | 0.2645(4)  | 0.3649(6)  | 0.64041(12) | 0.0481(8)    |
| C9   | 0.3494(4)  | 0.5236(5)  | 0.60616(12) | 0.0464(7)    |
| C10  | 0.2635(4)  | 0.5657(5)  | 0.55617(13) | 0.0484(8)    |
| O2   | 0.3230(4)  | 0.9498(5)  | 0.54393(11) | 0.0538(8)    |
| O3   | 0.3796(3)  | 0.8720(5)  | 0.43982(11) | 0.0525(8)    |
| C11  | 0.3433(4)  | 0.7304(6)  | 0.52314(14) | 0.0426(9)    |
| C12  | 0.2851(4)  | 0.7285(6)  | 0.46887(14) | 0.0429(8)    |
| C13  | 0.1155(5)  | 0.8130(10) | 0.4583(2)   | 0.0649(14)   |
| C14  | 0.1384(7)  | 0.0302(12) | 0.4312(2)   | 0.0837(17)   |
| C15  | 0.2858(5)  | 0.0222(8)  | 0.41014(17) | 0.0551(10)   |
| O2A  | 0.4607(11) | 0.7026(18) | 0.5091(4)   | 0.0538(8)    |
| O3A  | 0.1538(13) | 0.7506(16) | 0.4596(4)   | 0.0525(8)    |
| C11A | 0.3288(11) | 0.7767(12) | 0.5343(3)   | 0.0426(9)    |
| C12A | 0.2149(10) | 0.8966(14) | 0.4989(3)   | 0.0429(8)    |
| C13A | 0.2801(16) | 0.1035(18) | 0.4709(5)   | 0.0649(14)   |
| C14A | 0.207(3)   | 0.078(3)   | 0.4193(5)   | 0.0837(17)   |
| C15A | 0.1085(17) | 0.886(2)   | 0.4175(4)   | 0.0551(10)   |

**Table 5. Bond lengths (Å) for JTM1683.**

|        |          |        |          |
|--------|----------|--------|----------|
| O1-C2  | 1.377(4) | O1-C1  | 1.410(4) |
| C1-H1A | 0.980000 | C1-H1B | 0.980000 |
| C1-H1C | 0.980000 | C2-C7  | 1.389(4) |
| C2-C3  | 1.390(4) | C3-C4  | 1.385(5) |
| C3-H3  | 0.950000 | C4-C5  | 1.396(4) |

|               |          |               |           |
|---------------|----------|---------------|-----------|
| C4-H4         | 0.950000 | C5-C6         | 1.391(5)  |
| C5-C8         | 1.501(5) | C6-C7         | 1.389(5)  |
| C6-H6         | 0.950000 | C7-H7         | 0.950000  |
| C8-C9         | 1.534(4) | C8-H8A        | 0.990000  |
| C8-H8B        | 0.990000 | C9-C10        | 1.519(5)  |
| C9-H9A        | 0.990000 | C9-H9B        | 0.990000  |
| C10-<br>C11A  | 1.508(5) | C10-C11       | 1.514(4)  |
| C10-<br>H10A  | 0.990000 | C10-<br>H10B  | 0.990000  |
| O2-C11        | 1.433(4) | O2-H2         | 0.841(10) |
| O3-C15        | 1.420(5) | O3-C12        | 1.441(4)  |
| C11-C12       | 1.515(5) | C11-H11       | 1.000000  |
| C12-C13       | 1.563(6) | C12-H12       | 1.000000  |
| C13-C14       | 1.499(8) | C13-<br>H13A  | 0.990000  |
| C13-<br>H13B  | 0.990000 | C14-C15       | 1.426(7)  |
| C14-<br>H14A  | 0.990000 | C14-<br>H14B  | 0.990000  |
| C15-<br>H15A  | 0.990000 | C15-<br>H15B  | 0.990000  |
| O2A-<br>C11A  | 1.430(5) | O2A-H2A       | 0.840000  |
| O3A-<br>C15A  | 1.426(5) | O3A-<br>C12A  | 1.443(5)  |
| C11A-<br>C12A | 1.509(5) | C11A-<br>H11A | 1.000000  |
| C12A-<br>C13A | 1.562(6) | C12A-<br>H12A | 1.000000  |
| C13A-<br>C14A | 1.497(8) | C13A-<br>H13C | 0.990000  |
| C13A-<br>H13D | 0.990000 | C14A-<br>C15A | 1.426(7)  |
| C14A-<br>H14C | 0.990000 | C14A-<br>H14D | 0.990000  |

|               |          |               |          |
|---------------|----------|---------------|----------|
| C15A-<br>H15C | 0.990000 | C15A-<br>H15D | 0.990000 |
|---------------|----------|---------------|----------|

**Table 6. Bond angles (°) for JTM1683.**

|                 |            |                  |            |
|-----------------|------------|------------------|------------|
| C2-O1-C1        | 116.7(3)   | O1-C1-H1A        | 109.500000 |
| O1-C1-H1B       | 109.500000 | H1A-C1-<br>H1B   | 109.500000 |
| O1-C1-H1C       | 109.500000 | H1A-C1-<br>H1C   | 109.500000 |
| H1B-C1-<br>H1C  | 109.500000 | O1-C2-C7         | 124.6(3)   |
| O1-C2-C3        | 116.1(3)   | C7-C2-C3         | 119.3(3)   |
| C4-C3-C2        | 120.6(3)   | C4-C3-H3         | 119.700000 |
| C2-C3-H3        | 119.700000 | C3-C4-C5         | 121.3(3)   |
| C3-C4-H4        | 119.300000 | C5-C4-H4         | 119.300000 |
| C6-C5-C4        | 117.0(3)   | C6-C5-C8         | 121.5(3)   |
| C4-C5-C8        | 121.5(3)   | C7-C6-C5         | 122.7(3)   |
| C7-C6-H6        | 118.600000 | C5-C6-H6         | 118.600000 |
| C6-C7-C2        | 119.1(3)   | C6-C7-H7         | 120.400000 |
| C2-C7-H7        | 120.400000 | C5-C8-C9         | 112.3(3)   |
| C5-C8-H8A       | 109.100000 | C9-C8-H8A        | 109.100000 |
| C5-C8-H8B       | 109.100000 | C9-C8-H8B        | 109.100000 |
| H8A-C8-<br>H8B  | 107.900000 | C10-C9-C8        | 113.8(3)   |
| C10-C9-<br>H9A  | 108.800000 | C8-C9-H9A        | 108.800000 |
| C10-C9-<br>H9B  | 108.800000 | C8-C9-H9B        | 108.800000 |
| H9A-C9-<br>H9B  | 107.700000 | C11A-C10-<br>C9  | 107.8(4)   |
| C11-C10-<br>C9  | 114.1(3)   | C11-C10-<br>H10A | 108.700000 |
| C9-C10-<br>H10A | 108.700000 | C11-C10-<br>H10B | 108.700000 |



|                  |            |                   |            |
|------------------|------------|-------------------|------------|
| C9-C10-<br>H10B  | 108.700000 | H10A-C10-<br>H10B | 107.600000 |
| C11-O2-H2        | 95.(4)     | C15-O3-<br>C12    | 110.6(3)   |
| O2-C11-<br>C10   | 106.8(3)   | O2-C11-<br>C12    | 109.9(3)   |
| C10-C11-<br>C12  | 114.9(3)   | O2-C11-<br>H11    | 108.300000 |
| C10-C11-<br>H11  | 108.300000 | C12-C11-<br>H11   | 108.300000 |
| O3-C12-<br>C11   | 110.4(3)   | O3-C12-<br>C13    | 105.6(3)   |
| C11-C12-<br>C13  | 115.5(3)   | O3-C12-<br>H12    | 108.400000 |
| C11-C12-<br>H12  | 108.400000 | C13-C12-<br>H12   | 108.400000 |
| C14-C13-<br>C12  | 102.4(4)   | C14-C13-<br>H13A  | 111.300000 |
| C12-C13-<br>H13A | 111.300000 | C14-C13-<br>H13B  | 111.300000 |
| C12-C13-<br>H13B | 111.300000 | H13A-C13-<br>H13B | 109.200000 |
| C15-C14-<br>C13  | 108.0(4)   | C15-C14-<br>H14A  | 110.100000 |
| C13-C14-<br>H14A | 110.100000 | C15-C14-<br>H14B  | 110.100000 |
| C13-C14-<br>H14B | 110.100000 | H14A-C14-<br>H14B | 108.400000 |
| O3-C15-<br>C14   | 107.1(4)   | O3-C15-<br>H15A   | 110.300000 |
| C14-C15-<br>H15A | 110.300000 | O3-C15-<br>H15B   | 110.300000 |
| C14-C15-<br>H15B | 110.300000 | H15A-C15-<br>H15B | 108.500000 |
| C11A-O2A-<br>H2A | 109.500000 | C15A-O3A-<br>C12A | 108.3(4)   |
| O2A-C11A-<br>C10 | 104.8(8)   | O2A-C11A-<br>C12A | 111.0(4)   |

|                        |            |                        |            |
|------------------------|------------|------------------------|------------|
| C10-C11A-<br>C12A      | 113.1(6)   | O2A-C11A-<br>H11A      | 109.300000 |
| C10-C11A-<br>H11A      | 109.300000 | C12A-<br>C11A-<br>H11A | 109.300000 |
| O3A-C12A-<br>C11A      | 112.1(4)   | O3A-C12A-<br>C13A      | 104.4(4)   |
| C11A-<br>C12A-C13A     | 115.7(4)   | O3A-C12A-<br>H12A      | 108.100000 |
| C11A-<br>C12A-<br>H12A | 108.100000 | C13A-<br>C12A-<br>H12A | 108.100000 |
| C14A-<br>C13A-C12A     | 102.8(4)   | C14A-<br>C13A-H13C     | 111.200000 |
| C12A-<br>C13A-H13C     | 111.200000 | C14A-<br>C13A-<br>H13D | 111.200000 |
| C12A-<br>C13A-<br>H13D | 111.200000 | H13C-<br>C13A-<br>H13D | 109.100000 |
| C15A-<br>C14A-C13A     | 109.4(5)   | C15A-<br>C14A-H14C     | 109.800000 |
| C13A-<br>C14A-H14C     | 109.800000 | C15A-<br>C14A-<br>H14D | 109.800000 |
| C13A-<br>C14A-<br>H14D | 109.800000 | H14C-<br>C14A-<br>H14D | 108.200000 |
| O3A-C15A-<br>C14A      | 106.7(5)   | O3A-C15A-<br>H15C      | 110.400000 |
| C14A-<br>C15A-H15C     | 110.400000 | O3A-C15A-<br>H15D      | 110.400000 |
| C14A-<br>C15A-<br>H15D | 110.400000 | H15C-<br>C15A-<br>H15D | 108.600000 |

**Table 7. Torsion angles (°) for JTM1683.**

|                    |           |                    |           |
|--------------------|-----------|--------------------|-----------|
| C1-O1-C2-C7        | 2.4(4)    | C1-O1-C2-C3        | -177.7(3) |
| O1-C2-C3-C4        | -179.6(3) | C7-C2-C3-C4        | 0.3(4)    |
| C2-C3-C4-C5        | 0.0(5)    | C3-C4-C5-C6        | -0.2(4)   |
| C3-C4-C5-C8        | -178.3(3) | C4-C5-C6-C7        | 0.0(4)    |
| C8-C5-C6-C7        | 178.1(3)  | C5-C6-C7-C2        | 0.3(5)    |
| O1-C2-C7-C6        | 179.4(3)  | C3-C2-C7-C6        | -0.4(4)   |
| C6-C5-C8-C9        | -94.2(3)  | C4-C5-C8-C9        | 83.9(4)   |
| C5-C8-C9-C10       | 175.1(3)  | C8-C9-C10-C11A     | 161.1(5)  |
| C8-C9-C10-C11      | 177.4(3)  | C9-C10-C11-O2      | -73.5(4)  |
| C9-C10-C11-C12     | 164.3(3)  | C15-O3-C12-C11     | -129.8(3) |
| C15-O3-C12-C13     | -4.3(4)   | O2-C11-C12-O3      | 65.9(4)   |
| C10-C11-C12-O3     | -173.6(3) | O2-C11-C12-C13     | -53.7(4)  |
| C10-C11-C12-C13    | 66.8(4)   | O3-C12-C13-C14     | -10.9(5)  |
| C11-C12-C13-C14    | 111.4(4)  | C12-C13-C14-C15    | 22.5(6)   |
| C12-O3-C15-C14     | 18.9(5)   | C13-C14-C15-O3     | -26.1(6)  |
| C9-C10-C11A-O2A    | 85.3(6)   | C9-C10-C11A-C12A   | -153.7(5) |
| C15A-O3A-C12A-C11A | -153.7(8) | C15A-O3A-C12A-C13A | -27.8(9)  |
| O2A-C11A-C12A-O3A  | 62.8(9)   | C10-C11A-C12A-O3A  | -54.7(8)  |
| O2A-C11A-C12A-C13A | -56.8(10) | C10-C11A-C12A-C13A | -174.3(8) |

|                         |               |                         |           |
|-------------------------|---------------|-------------------------|-----------|
| O3A-C12A-<br>C13A-C14A  | 15.6(13)      | C11A-C12A-<br>C13A-C14A | 139.3(12) |
| C12A-C13A-<br>C14A-C15A | 1.5(17)       | C12A-O3A-<br>C15A-C14A  | 29.5(13)  |
| C13A-C14A-<br>C15A-O3A  | -<br>18.5(17) |                         |           |

### Table 8. Anisotropic atomic displacement parameters ( $\text{\AA}^2$ ) for JTM1683.

The anisotropic atomic displacement factor exponent takes the form:  $-2\pi^2 [ h^2 a^{*2} U_{11} + \dots + 2 h k a^* b^* U_{12} ]$

|     | $U_{11}$   | $U_{22}$   | $U_{33}$   | $U_{23}$           | $U_{13}$   | $U_{12}$           |
|-----|------------|------------|------------|--------------------|------------|--------------------|
| O1  | 0.0495(12) | 0.0574(14) | 0.0522(12) | $\bar{0.0081(11)}$ | 0.0064(10) | 0.0082(11)         |
| C1  | 0.0552(19) | 0.057(2)   | 0.066(2)   | 0.0019(17)         | 0.0059(16) | 0.0060(17)         |
| C2  | 0.0399(15) | 0.0416(15) | 0.0467(15) | $\bar{0.0041(13)}$ | 0.0134(12) | $\bar{0.0053(12)}$ |
| C3  | 0.0446(16) | 0.0418(16) | 0.0516(17) | $\bar{0.0128(13)}$ | 0.0145(13) | $\bar{0.0020(13)}$ |
| C4  | 0.0444(16) | 0.0373(15) | 0.0540(17) | $\bar{0.0073(13)}$ | 0.0155(13) | $\bar{0.0014(13)}$ |
| C5  | 0.0434(15) | 0.0380(15) | 0.0483(16) | $\bar{0.0027(12)}$ | 0.0157(12) | $\bar{0.0093(12)}$ |
| C6  | 0.0566(18) | 0.0363(15) | 0.0486(16) | $\bar{0.0091(13)}$ | 0.0169(14) | $\bar{0.0071(13)}$ |
| C7  | 0.0506(17) | 0.0339(15) | 0.0556(17) | $\bar{0.0051(13)}$ | 0.0168(14) | 0.0008(13)         |
| C8  | 0.0476(17) | 0.0443(17) | 0.0536(17) | $\bar{0.0038(14)}$ | 0.0116(13) | $\bar{0.0110(13)}$ |
| C9  | 0.0478(17) | 0.0389(16) | 0.0531(17) | 0.0001(13)         | 0.0091(13) | $\bar{0.0058(13)}$ |
| C10 | 0.0429(16) | 0.0393(16) | 0.0635(19) | 0.0059(14)         | 0.0068(14) | $\bar{0.0042(13)}$ |
| O2  | 0.0611(17) | 0.0369(14) | 0.0647(17) | $\bar{0.0059(12)}$ | 0.0140(14) | $\bar{0.0035(13)}$ |

|      | U <sub>11</sub> | U <sub>22</sub> | U <sub>33</sub> | U <sub>23</sub>         | U <sub>13</sub>         | U <sub>12</sub>         |
|------|-----------------|-----------------|-----------------|-------------------------|-------------------------|-------------------------|
| O3   | 0.0488(15)      | 0.0467(15)      | 0.0632(17)      | 0.0084(13)              | 0.0130(12)              | <sup>-</sup> 0.0042(12) |
| C11  | 0.0385(16)      | 0.0337(18)      | 0.056(2)        | <sup>-</sup> 0.0044(15) | 0.0080(15)              | <sup>-</sup> 0.0019(14) |
| C12  | 0.0424(18)      | 0.0348(17)      | 0.0524(19)      | <sup>-</sup> 0.0002(15) | 0.0112(15)              | <sup>-</sup> 0.0037(15) |
| C13  | 0.041(2)        | 0.067(3)        | 0.086(3)        | 0.002(2)                | -0.001(2)               | 0.006(2)                |
| C14  | 0.083(3)        | 0.094(4)        | 0.077(3)        | 0.032(3)                | 0.033(3)                | 0.028(3)                |
| C15  | 0.059(2)        | 0.043(2)        | 0.062(2)        | 0.0031(18)              | <sup>-</sup> 0.0024(19) | <sup>-</sup> 0.0040(18) |
| O2A  | 0.0611(17)      | 0.0369(14)      | 0.0647(17)      | <sup>-</sup> 0.0059(12) | 0.0140(14)              | <sup>-</sup> 0.0035(13) |
| O3A  | 0.0488(15)      | 0.0467(15)      | 0.0632(17)      | 0.0084(13)              | 0.0130(12)              | <sup>-</sup> 0.0042(12) |
| C11A | 0.0385(16)      | 0.0337(18)      | 0.056(2)        | <sup>-</sup> 0.0044(15) | 0.0080(15)              | <sup>-</sup> 0.0019(14) |
| C12A | 0.0424(18)      | 0.0348(17)      | 0.0524(19)      | <sup>-</sup> 0.0002(15) | 0.0112(15)              | <sup>-</sup> 0.0037(15) |
| C13A | 0.041(2)        | 0.067(3)        | 0.086(3)        | 0.002(2)                | -0.001(2)               | 0.006(2)                |
| C14A | 0.083(3)        | 0.094(4)        | 0.077(3)        | 0.032(3)                | 0.033(3)                | 0.028(3)                |
| C15A | 0.059(2)        | 0.043(2)        | 0.062(2)        | 0.0031(18)              | <sup>-</sup> 0.0024(19) | <sup>-</sup> 0.0040(18) |

**Table 9. Hydrogen atomic coordinates and isotropic atomic displacement parameters (Å<sup>2</sup>) for JTM1683.**

|     | x/a    | y/b     | z/c    | U(eq)    |
|-----|--------|---------|--------|----------|
| H1A | 0.6637 | -0.1429 | 0.8143 | 0.089000 |
| H1B | 0.7718 | -0.0198 | 0.8563 | 0.089000 |
| H1C | 0.8058 | 0.0087  | 0.7987 | 0.089000 |
| H3  | 0.4509 | 0.5081  | 0.7993 | 0.055000 |

|      | <b>x/a</b> | <b>y/b</b> | <b>z/c</b> | <b>U(eq)</b> |
|------|------------|------------|------------|--------------|
| H4   | 0.2995     | 0.5874     | 0.7273     | 0.054000     |
| H6   | 0.4516     | 0.0196     | 0.6642     | 0.056000     |
| H7   | 0.6050     | -0.0619    | 0.7358     | 0.055000     |
| H8A  | 0.1659     | 0.4356     | 0.6490     | 0.058000     |
| H8B  | 0.2393     | 0.2231     | 0.6223     | 0.058000     |
| H9A  | 0.3666     | 0.6695     | 0.6234     | 0.056000     |
| H9B  | 0.4521     | 0.4586     | 0.6003     | 0.056000     |
| H10A | 0.2506     | 0.4205     | 0.5383     | 0.058000     |
| H10B | 0.1590     | 0.6238     | 0.5621     | 0.058000     |
| H2   | 0.418(2)   | 0.983(10)  | 0.545(2)   | 0.081000     |
| H11  | 0.4563     | 0.6949     | 0.5249     | 0.051000     |
| H12  | 0.2925     | 0.5712     | 0.4560     | 0.051000     |
| H13A | 0.0543     | 0.7048     | 0.4372     | 0.078000     |
| H13B | 0.0633     | 0.8379     | 0.4897     | 0.078000     |
| H14A | 0.0557     | 1.0503     | 0.4046     | 0.100000     |
| H14B | 0.1343     | 1.1584     | 0.4547     | 0.100000     |
| H15A | 0.2748     | 0.9678     | 0.3753     | 0.066000     |
| H15B | 0.3330     | 1.1740     | 0.4103     | 0.066000     |
| H2A  | 0.5169     | 0.6220     | 0.5284     | 0.081000     |
| H11A | 0.3632     | 0.8813     | 0.5619     | 0.051000     |
| H12A | 0.1267     | 0.9496     | 0.5183     | 0.051000     |
| H13C | 0.2490     | 1.2468     | 0.4863     | 0.078000     |
| H13D | 0.3943     | 1.0975     | 0.4708     | 0.078000     |
| H14C | 0.1465     | 1.2150     | 0.4102     | 0.100000     |
| H14D | 0.2886     | 1.0605     | 0.3952     | 0.100000     |
| H15C | -0.0009    | 0.9326     | 0.4188     | 0.066000     |
| H15D | 0.1203     | 0.8009     | 0.3862     | 0.066000     |

**Table 10. Hydrogen bond distances (Å) and angles (°) for JTM1683.**

|                                                           | <b>Donor-H</b> | <b>Acceptor-H</b> | <b>Donor-Acceptor</b> | <b>Angle</b> |
|-----------------------------------------------------------|----------------|-------------------|-----------------------|--------------|
| O2 <sup>a-</sup><br>H2 <sup>a</sup> ...O3 <sup>a</sup> #1 | 0.841(10)      | 1.98(2)           | 2.796(4)              | 163.(6)      |

Symmetry transformations used to generate equivalent atoms:

#1 -x+1, -y+2, -z+1

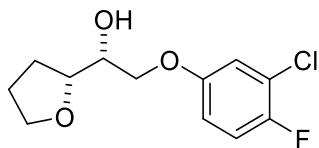

CCDC 2233480

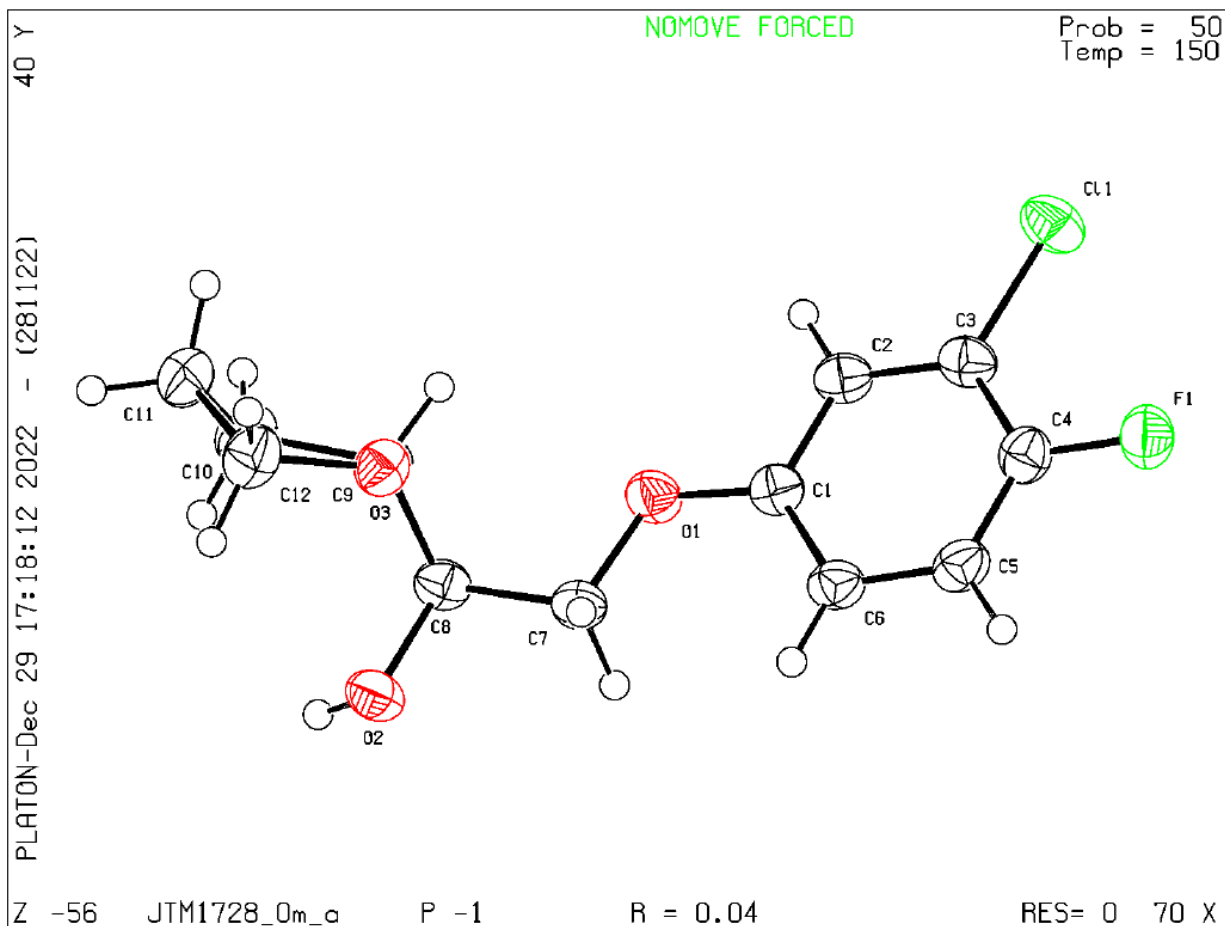

Crystals grown from pentane.

## Crystal Structure Report for **JTM1728**

A **colorless, block-like** specimen of  $C_{12}H_{14}ClFO_3$ , approximate dimensions **0.135 mm** x **0.136 mm** x **0.219 mm**, was used for the X-ray crystallographic analysis. The X-ray intensity data were measured on a Bruker D8 VENTURE PHOTON 3 CPAD system equipped with a INCOATEC I $\mu$ S micro--focus source (Cu-K $\alpha$ ,  $\lambda = 1.54178$  Å) and a mirror monochromator.

**Table 1: Data collection details for JTM1728.**



| Axis  | dx/mm  | 2 $\theta$ / $^\circ$ | $\omega$ / $^\circ$ | $\phi$ / $^\circ$ | $\chi$ / $^\circ$ | Width/h $^\circ$ | Frames | Time/s | Wavelength/ $\text{\AA}$ | Voltage/kV | Current/mA | Temperature/K |
|-------|--------|-----------------------|---------------------|-------------------|-------------------|------------------|--------|--------|--------------------------|------------|------------|---------------|
| Phi   | 39.968 | 48.14                 | 40.70               | 0.00              | 54.76             | 0.50             | 720    | 4.00   | 1.54184                  | 50         | 1.0        | n/a           |
| Omega | 39.968 | 107.55                | -64.89              | 0.00              | 54.76             | 0.50             | 330    | 15.00  | 1.54184                  | 50         | 1.0        | n/a           |
| Omega | 39.968 | 107.55                | -64.89              | 252.00            | 54.76             | 0.50             | 330    | 15.00  | 1.54184                  | 50         | 1.0        | n/a           |
| Omega | 39.968 | 107.55                | 100.11              | 160.00            | 54.76             | 0.50             | 330    | 15.00  | 1.54184                  | 50         | 1.0        | n/a           |
| Omega | 39.968 | 107.55                | -64.89              | 80.00             | 54.76             | 0.50             | 330    | 15.00  | 1.54184                  | 50         | 1.0        | n/a           |
| Omega | 39.968 | 62.55                 | 55.11               | 0.00              | 54.76             | 0.50             | 330    | 5.30   | 1.54184                  | 50         | 1.0        | n/a           |
| Omega | 39.968 | 107.55                | -64.89              | 120.00            | 54.76             | 0.50             | 330    | 15.00  | 1.54184                  | 50         | 1.0        | n/a           |
| Omega | 39.968 | 107.55                | -64.89              | -160.00           | 54.76             | 0.50             | 330    | 15.00  | 1.54184                  | 50         | 1.0        | n/a           |
| Omega | 39.968 | 107.55                | 100.11              | -80.00            | 54.76             | 0.50             | 330    | 15.00  | 1.54184                  | 50         | 1.0        | n/a           |
| Omega | 39.968 | 107.55                | 100.11              | 40.00             | 54.76             | 0.50             | 330    | 15.00  | 1.54184                  | 50         | 1.0        | n/a           |
| Omega | 39.968 | 77.55                 | 70.11               | 180.00            | 54.76             | 0.50             | 330    | 7.40   | 1.54184                  | 50         | 1.0        | n/a           |
| Omega | 39.968 | 107.55                | -64.89              | -40.00            | 54.76             | 0.50             | 330    | 15.00  | 1.54184                  | 50         | 1.0        | n/a           |
| Omega | 39.968 | 107.55                | -64.89              | 120.00            | 54.76             | 0.50             | 330    | 15.00  | 1.54184                  | 50         | 1.0        | n/a           |

A total of 4680 frames were collected. The total exposure time was 15.71 hours. The frames were integrated with the Bruker SAINT software package using a narrow-

frame algorithm. The integration of the data using a **triclinic** unit cell yielded a total of **11951** reflections to a maximum  $\theta$  angle of **74.47°** (**0.80 Å** resolution), of which **2412** were independent (average redundancy **4.955**, completeness = **98.6%**,  $R_{\text{int}} = 3.18\%$ ,  $R_{\text{sig}} = 2.49\%$ ) and **2327** (**96.48%**) were greater than  $2\sigma(F^2)$ . The final cell constants of  $\underline{a} = 4.9861(2)$  Å,  $\underline{b} = 11.0524(5)$  Å,  $\underline{c} = 11.1934(5)$  Å,  $\alpha = 94.348(2)^\circ$ ,  $\beta = 97.8150(10)^\circ$ ,  $\gamma = 99.1760(10)^\circ$ , volume = **600.30(5)** Å<sup>3</sup>, are based upon the refinement of the XYZ-centroids of **9936** reflections above  $20 \sigma(I)$  with  $8.012^\circ < 2\theta < 148.9^\circ$ . Data were corrected for absorption effects using the multi-scan method (SADABS). The ratio of minimum to maximum apparent transmission was **0.839**. The calculated minimum and maximum transmission coefficients (based on crystal size) are **0.5680** and **0.6950**.

The structure was solved and refined using the Bruker SHELXTL Software Package, using the space group **P -1**, with  $Z = 2$  for the formula unit, **C<sub>12</sub>H<sub>14</sub>ClFO<sub>3</sub>**. The final anisotropic full-matrix least-squares refinement on  $F^2$  with **158** variables converged at  $R1 = 3.59\%$ , for the observed data and  $wR2 = 9.91\%$  for all data. The goodness-of-fit was **1.056**. The largest peak in the final difference electron density synthesis was **0.415** e<sup>-</sup>/Å<sup>3</sup> and the largest hole was **-0.182** e<sup>-</sup>/Å<sup>3</sup> with an RMS deviation of **0.053** e<sup>-</sup>/Å<sup>3</sup>. On the basis of the final model, the calculated density was **1.442** g/cm<sup>3</sup> and  $F(000)$ , **272** e<sup>-</sup>.

## Table 2. Sample and crystal data for JTM1728.

|                               |                                                                                                                                                   |
|-------------------------------|---------------------------------------------------------------------------------------------------------------------------------------------------|
| <b>Identification code</b>    | JTM1728                                                                                                                                           |
| <b>Chemical formula</b>       | C <sub>12</sub> H <sub>14</sub> ClFO <sub>3</sub>                                                                                                 |
| <b>Formula weight</b>         | 260.68 g/mol                                                                                                                                      |
| <b>Temperature</b>            | 150(2) K                                                                                                                                          |
| <b>Wavelength</b>             | 1.54178 Å                                                                                                                                         |
| <b>Crystal size</b>           | 0.135 x 0.136 x 0.219 mm                                                                                                                          |
| <b>Crystal habit</b>          | colorless block                                                                                                                                   |
| <b>Crystal system</b>         | triclinic                                                                                                                                         |
| <b>Space group</b>            | P -1                                                                                                                                              |
| <b>Unit cell dimensions</b>   | $a = 4.9861(2)$ Å $\alpha = 94.348(2)^\circ$<br>$b = 11.0524(5)$ Å $\beta = 97.8150(10)^\circ$<br>$c = 11.1934(5)$ Å $\gamma = 99.1760(10)^\circ$ |
| <b>Volume</b>                 | 600.30(5) Å <sup>3</sup>                                                                                                                          |
| <b>Z</b>                      | 2                                                                                                                                                 |
| <b>Density (calculated)</b>   | 1.442 g/cm <sup>3</sup>                                                                                                                           |
| <b>Absorption coefficient</b> | 2.911 mm <sup>-1</sup>                                                                                                                            |

**Table 3. Data collection and structure refinement for JTM1728.**

|                                            |                                                                                              |
|--------------------------------------------|----------------------------------------------------------------------------------------------|
| <b>Diffractometer</b>                      | Bruker D8 VENTURE PHOTON 3<br>CPAD                                                           |
| <b>Radiation source</b>                    | INCOATEC I $\mu$ S micro--focus source<br>(Cu-K $\alpha$ , $\lambda = 1.54178 \text{ \AA}$ ) |
| <b>Theta range for data collection</b>     | 4.01 to 74.47 $^\circ$                                                                       |
| <b>Index ranges</b>                        | -6 $\leq h \leq 6$ , -13 $\leq k \leq 13$ , -13 $\leq l \leq 13$                             |
| <b>Reflections collected</b>               | 11951                                                                                        |
| <b>Independent reflections</b>             | 2412 [R(int) = 0.0318]                                                                       |
| <b>Coverage of independent reflections</b> | 98.6%                                                                                        |
| <b>Absorption correction</b>               | multi-scan                                                                                   |
| <b>Max. and min. transmission</b>          | 0.6950 and 0.5680                                                                            |
| <b>Structure solution technique</b>        | direct methods                                                                               |
| <b>Structure solution program</b>          | <i>SHELXT</i> (Sheldrick, 2015a)                                                             |
| <b>Refinement method</b>                   | Full-matrix least-squares on F <sup>2</sup>                                                  |
| <b>Refinement program</b>                  | <i>SHELXL</i> (Sheldrick, 2015b)                                                             |
| <b>Function minimized</b>                  | $\Sigma w(F_o^2 - F_c^2)^2$                                                                  |
| <b>Data / restraints / parameters</b>      | 2412 / 0 / 158                                                                               |
| <b>Goodness-of-fit on F<sup>2</sup></b>    | 1.056                                                                                        |
| <b><math>\Delta/\sigma_{\max}</math></b>   | 0.001                                                                                        |

|                                    |                                                                                     |                           |
|------------------------------------|-------------------------------------------------------------------------------------|---------------------------|
| <b>Final R indices</b>             | 2327 data; $I > 2\sigma(I)$                                                         | R1 = 0.0359, wR2 = 0.0979 |
|                                    | all data                                                                            | R1 = 0.0368, wR2 = 0.0991 |
| <b>Weighting scheme</b>            | $w = 1/[\sigma^2(F_o^2) + (0.0605P)^2 + 0.1513P]$<br>where $P = (F_o^2 + 2F_c^2)/3$ |                           |
| <b>Largest diff. peak and hole</b> | 0.415 and -0.182 eÅ <sup>-3</sup>                                                   |                           |
| <b>R.M.S. deviation from mean</b>  | 0.053 eÅ <sup>-3</sup>                                                              |                           |

**Table 4. Atomic coordinates and equivalent isotropic atomic displacement parameters (Å<sup>2</sup>) for JTM1728.**

U(eq) is defined as one third of the trace of the orthogonalized U<sub>ij</sub> tensor.

|     | <b>x/a</b>  | <b>y/b</b>  | <b>z/c</b>  | <b>U(eq)</b> |
|-----|-------------|-------------|-------------|--------------|
| C11 | 0.11344(7)  | 0.44586(3)  | 0.27570(3)  | 0.04120(14)  |
| F1  | 0.00488(18) | 0.19015(8)  | 0.16785(7)  | 0.0415(2)    |
| O1  | 0.3988(2)   | 0.28176(9)  | 0.52755(9)  | 0.0342(2)    |
| O2  | 0.9420(2)   | 0.13053(9)  | 0.71267(10) | 0.0360(2)    |
| O3  | 0.50551(19) | 0.19029(9)  | 0.81613(8)  | 0.0338(2)    |
| C1  | 0.5391(3)   | 0.25236(12) | 0.43576(12) | 0.0303(3)    |
| C2  | 0.7256(3)   | 0.34910(12) | 0.40552(12) | 0.0319(3)    |
| C3  | 0.8799(3)   | 0.32749(12) | 0.31519(12) | 0.0320(3)    |
| C4  | 0.8498(3)   | 0.21031(13) | 0.25565(12) | 0.0337(3)    |
| C5  | 0.6636(3)   | 0.11510(13) | 0.28351(12) | 0.0347(3)    |
| C6  | 0.5043(3)   | 0.13532(12) | 0.37345(12) | 0.0326(3)    |
| C7  | 0.2221(3)   | 0.18251(12) | 0.56752(12) | 0.0308(3)    |
| C8  | 0.1175(3)   | 0.23268(12) | 0.67909(12) | 0.0313(3)    |
| C9  | 0.3515(3)   | 0.28599(12) | 0.78107(12) | 0.0321(3)    |
| C10 | 0.2631(3)   | 0.33720(14) | 0.89774(14) | 0.0412(3)    |

|     | x/a       | y/b         | z/c         | U(eq)     |
|-----|-----------|-------------|-------------|-----------|
| C11 | 0.4650(3) | 0.30015(14) | 0.99740(13) | 0.0410(3) |
| C12 | 0.4972(3) | 0.17501(14) | 0.94184(13) | 0.0415(3) |

**Table 5. Bond lengths (Å) for JTM1728.**

|              |            |              |            |
|--------------|------------|--------------|------------|
| C11-C3       | 1.7335(14) | F1-C4        | 1.3573(16) |
| O1-C1        | 1.3669(17) | O1-C7        | 1.4327(16) |
| O2-C8        | 1.4212(16) | O2-H2A       | 0.81(2)    |
| O3-C12       | 1.4352(17) | O3-C9        | 1.4498(16) |
| C1-C2        | 1.3950(19) | C1-C6        | 1.3959(19) |
| C2-C3        | 1.380(2)   | C2-H2        | 0.950000   |
| C3-C4        | 1.387(2)   | C4-C5        | 1.372(2)   |
| C5-C6        | 1.391(2)   | C5-H5        | 0.950000   |
| C6-H6        | 0.950000   | C7-C8        | 1.5178(19) |
| C7-H7A       | 0.990000   | C7-H7B       | 0.990000   |
| C8-C9        | 1.5259(19) | C8-H8        | 1.000000   |
| C9-C10       | 1.5311(19) | C9-H9        | 1.000000   |
| C10-C11      | 1.524(2)   | C10-<br>H10A | 0.990000   |
| C10-<br>H10B | 0.990000   | C11-C12      | 1.514(2)   |
| C11-<br>H11A | 0.990000   | C11-<br>H11B | 0.990000   |
| C12-<br>H12A | 0.990000   | C12-<br>H12B | 0.990000   |

**Table 6. Bond angles (°) for JTM1728.**

|           |            |               |            |
|-----------|------------|---------------|------------|
| C1-O1-C7  | 116.80(10) | C8-O2-<br>H2A | 111.2(17)  |
| C12-O3-C9 | 109.25(10) | O1-C1-C2      | 115.37(11) |
| O1-C1-C6  | 124.29(12) | C2-C1-C6      | 120.33(13) |

|                   |            |                  |            |
|-------------------|------------|------------------|------------|
| C3-C2-C1          | 119.41(12) | C3-C2-H2         | 120.300000 |
| C1-C2-H2          | 120.300000 | C2-C3-C4         | 120.05(12) |
| C2-C3-C11         | 120.46(10) | C4-C3-C11        | 119.48(11) |
| F1-C4-C5          | 119.71(12) | F1-C4-C3         | 119.40(12) |
| C5-C4-C3          | 120.89(13) | C4-C5-C6         | 119.91(12) |
| C4-C5-H5          | 120.000000 | C6-C5-H5         | 120.000000 |
| C5-C6-C1          | 119.37(12) | C5-C6-H6         | 120.300000 |
| C1-C6-H6          | 120.300000 | O1-C7-C8         | 107.75(10) |
| O1-C7-H7A         | 110.200000 | C8-C7-<br>H7A    | 110.200000 |
| O1-C7-H7B         | 110.200000 | C8-C7-<br>H7B    | 110.200000 |
| H7A-C7-<br>H7B    | 108.500000 | O2-C8-C7         | 104.76(10) |
| O2-C8-C9          | 111.87(11) | C7-C8-C9         | 112.02(11) |
| O2-C8-H8          | 109.400000 | C7-C8-H8         | 109.400000 |
| C9-C8-H8          | 109.400000 | O3-C9-C8         | 109.49(10) |
| O3-C9-C10         | 105.50(11) | C8-C9-C10        | 115.33(12) |
| O3-C9-H9          | 108.800000 | C8-C9-H9         | 108.800000 |
| C10-C9-H9         | 108.800000 | C11-C10-<br>C9   | 103.44(12) |
| C11-C10-<br>H10A  | 111.100000 | C9-C10-<br>H10A  | 111.100000 |
| C11-C10-<br>H10B  | 111.100000 | C9-C10-<br>H10B  | 111.100000 |
| H10A-C10-<br>H10B | 109.000000 | C12-C11-<br>C10  | 100.62(12) |
| C12-C11-<br>H11A  | 111.600000 | C10-C11-<br>H11A | 111.600000 |
| C12-C11-<br>H11B  | 111.600000 | C10-C11-<br>H11B | 111.600000 |
| H11A-C11-<br>H11B | 109.400000 | O3-C12-<br>C11   | 104.59(12) |
| O3-C12-<br>H12A   | 110.800000 | C11-C12-<br>H12A | 110.800000 |

|                   |            |                  |            |
|-------------------|------------|------------------|------------|
| O3-C12-<br>H12B   | 110.800000 | C11-C12-<br>H12B | 110.800000 |
| H12A-C12-<br>H12B | 108.900000 |                  |            |

**Table 7. Torsion angles (°) for JTM1728.**

|                    |                 |                   |                 |
|--------------------|-----------------|-------------------|-----------------|
| C7-O1-C1-<br>C2    | -<br>175.09(11) | C7-O1-C1-<br>C6   | 5.27(18)        |
| O1-C1-C2-<br>C3    | 178.95(11)      | C6-C1-C2-<br>C3   | -1.39(19)       |
| C1-C2-C3-<br>C4    | -0.27(19)       | C1-C2-C3-<br>C11  | -<br>179.96(10) |
| C2-C3-C4-<br>F1    | -<br>179.33(12) | C11-C3-C4-<br>F1  | 0.36(17)        |
| C2-C3-C4-<br>C5    | 1.3(2)          | C11-C3-C4-<br>C5  | -<br>178.98(10) |
| F1-C4-C5-<br>C6    | 179.96(12)      | C3-C4-C5-<br>C6   | -0.7(2)         |
| C4-C5-C6-<br>C1    | -1.0(2)         | O1-C1-C6-<br>C5   | -<br>178.36(12) |
| C2-C1-C6-<br>C5    | 2.0(2)          | C1-O1-C7-<br>C8   | 172.83(10)      |
| O1-C7-C8-<br>O2    | 179.24(10)      | O1-C7-C8-<br>C9   | -59.29(13)      |
| C12-O3-C9-<br>C8   | -<br>120.45(12) | C12-O3-C9-<br>C10 | 4.24(14)        |
| O2-C8-C9-<br>O3    | 56.78(14)       | C7-C8-C9-<br>O3   | -60.51(14)      |
| O2-C8-C9-<br>C10   | -61.99(15)      | C7-C8-C9-<br>C10  | -<br>179.27(11) |
| O3-C9-C10-<br>C11  | 21.01(14)       | C8-C9-C10-<br>C11 | 141.97(12)      |
| C9-C10-<br>C11-C12 | -36.61(15)      | C9-O3-C12-<br>C11 | -28.16(15)      |

C10-C11- 39.93(15)  
C12-O3

**Table 8. Anisotropic atomic displacement parameters ( $\text{\AA}^2$ ) for JTM1728.**

The anisotropic atomic displacement factor exponent takes the form:  $-2\pi^2[ h^2 a^{*2} U_{11} + \dots + 2 h k a^* b^* U_{12} ]$

|     | $U_{11}$  | $U_{22}$  | $U_{33}$  | $U_{23}$    | $U_{13}$    | $U_{12}$    |
|-----|-----------|-----------|-----------|-------------|-------------|-------------|
| C11 | 0.0422(2) | 0.0298(2) | 0.0535(2) | 0.01125(15) | 0.01379(16) | 0.00312(14) |
| F1  | 0.0485(5) | 0.0415(5) | 0.0365(4) | 0.0033(3)   | 0.0130(4)   | 0.0084(4)   |
| O1  | 0.0386(5) | 0.0247(5) | 0.0399(5) | 0.0030(4)   | 0.0112(4)   | 0.0028(4)   |
| O2  | 0.0320(5) | 0.0286(5) | 0.0477(6) | 0.0007(4)   | 0.0131(4)   | 0.0015(4)   |
| O3  | 0.0331(5) | 0.0346(5) | 0.0345(5) | 0.0004(4)   | 0.0049(4)   | 0.0102(4)   |
| C1  | 0.0318(6) | 0.0272(6) | 0.0315(6) | 0.0048(5)   | 0.0020(5)   | 0.0057(5)   |
| C2  | 0.0341(6) | 0.0237(6) | 0.0371(7) | 0.0035(5)   | 0.0022(5)   | 0.0050(5)   |
| C3  | 0.0328(6) | 0.0264(6) | 0.0363(7) | 0.0091(5)   | 0.0017(5)   | 0.0039(5)   |
| C4  | 0.0374(7) | 0.0339(7) | 0.0305(6) | 0.0047(5)   | 0.0042(5)   | 0.0080(5)   |
| C5  | 0.0423(7) | 0.0266(6) | 0.0328(6) | 0.0004(5)   | 0.0016(5)   | 0.0039(5)   |
| C6  | 0.0362(7) | 0.0252(6) | 0.0343(6) | 0.0038(5)   | 0.0020(5)   | 0.0012(5)   |
| C7  | 0.0320(6) | 0.0249(6) | 0.0348(6) | 0.0039(5)   | 0.0044(5)   | 0.0024(5)   |
| C8  | 0.0319(6) | 0.0238(6) | 0.0384(7) | 0.0033(5)   | 0.0057(5)   | 0.0055(5)   |
| C9  | 0.0345(6) | 0.0230(6) | 0.0380(7) | 0.0022(5)   | 0.0061(5)   | 0.0028(5)   |
| C10 | 0.0465(8) | 0.0340(7) | 0.0428(8) | -0.0067(6)  | 0.0056(6)   | 0.0113(6)   |
| C11 | 0.0468(8) | 0.0384(8) | 0.0363(7) | -0.0033(6)  | 0.0078(6)   | 0.0052(6)   |
| C12 | 0.0523(9) | 0.0374(8) | 0.0354(7) | 0.0035(6)   | 0.0051(6)   | 0.0112(6)   |

**Table 9. Hydrogen atomic coordinates and isotropic atomic displacement parameters ( $\text{\AA}^2$ ) for JTM1728.**



|      | x/a      | y/b      | z/c      | U(eq)    |
|------|----------|----------|----------|----------|
| H2A  | 0.183(5) | 0.152(2) | 0.743(2) | 0.060(6) |
| H2   | 0.7463   | 0.4292   | 0.4467   | 0.038000 |
| H5   | 0.6435   | 0.0355   | 0.2414   | 0.042000 |
| H6   | 0.3731   | 0.0701   | 0.3923   | 0.039000 |
| H7A  | 0.3248   | 0.1153   | 0.5875   | 0.037000 |
| H7B  | 0.0660   | 0.1493   | 0.5028   | 0.037000 |
| H8   | 0.0077   | 0.2981   | 0.6570   | 0.038000 |
| H9   | 0.4770   | 0.3529   | 0.7509   | 0.038000 |
| H10A | 0.2780   | 0.4279   | 0.9017   | 0.049000 |
| H10B | 0.0717   | 0.3001   | 0.9037   | 0.049000 |
| H11A | 0.6417   | 0.3583   | 1.0121   | 0.049000 |
| H11B | 0.3879   | 0.2942   | 1.0741   | 0.049000 |
| H12A | 0.6691   | 0.1508   | 0.9800   | 0.050000 |
| H12B | 0.3399   | 0.1114   | 0.9515   | 0.050000 |

**Table 10. Hydrogen bond distances (Å) and angles (°) for JTM1728.**

|                     | Donor-<br>H | Acceptor-<br>H | Donor-<br>Acceptor | Angle      |
|---------------------|-------------|----------------|--------------------|------------|
| O2-<br>H2A...O3#1   | 0.81(2)     | 1.94(2)        | 2.7464(14)         | 175.(2)    |
| C5-<br>H5...O3#5    | 0.950000    | 2.500000       | 3.4078(17)         | 160.900000 |
| C6-<br>H6...O2#4    | 0.950000    | 2.600000       | 3.3789(16)         | 139.500000 |
| C9-<br>H9...C11#6   | 1.000000    | 2.830000       | 3.8118(14)         | 166.400000 |
| C11-<br>H11B...F1#2 | 0.990000    | 2.470000       | 3.3217(18)         | 144.000000 |
| C12-<br>H12A...F1#3 | 0.990000    | 2.470000       | 3.3007(18)         | 141.700000 |

Symmetry transformations used to generate equivalent atoms:

- #1  $x-1, y, z$
- #2  $x-1, y, z+1$
- #3  $x, y, z+1$
- #4  $-x, -y, -z+1$
- #5  $-x+1, -y, -z+1$
- #6  $-x+2, -y+1, -z+1$

## **X. Structural Reasoning**

### **1. For silanoxy-tetrahydrofurans**

We were unable to grow a crystal structure of the silanoxy-products; the presence of the silyl group makes most compounds oils or semi-solids. We thus removed the silyl group from two of the products and grew crystals of the corresponding alcohols (See X-ray crystallography section). The other product identities were assigned by analogy to these.

### **General Procedure D**

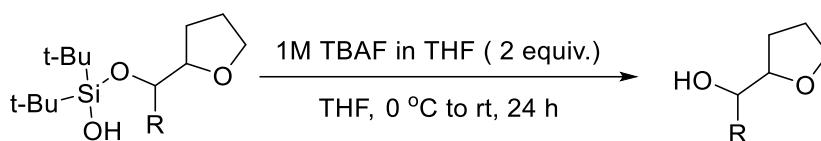

A 25 mL round-bottom flask was charged with a stir-bar, silanoxy-tetrahydrofuran substrate (0.2 mmol), and anhydrous THF (2 mL). The reaction flask was cooled to 0 °C using an ice-water bath. Subsequently, TBAF (1M solution in THF, 0.4 mL, 0.4 mmol, 2 equiv.) was added dropwise. The reaction mixture was allowed to warm to room temperature over a period of 24 h. After this time, the reaction was diluted with EtOAc (1 mL), transferred to a separatory funnel, and washed once with saturated aqueous NH<sub>4</sub>Cl solution (1 mL). The organic layer was separated, and the aqueous layer was extracted with two additional portions of EtOAc (2 x 5 mL). The combined organic layers were washed with brine solution (2 mL), dried over anhydrous MgSO<sub>4</sub>, and the solvent was removed *in vacuo*. The resulting residue was purified through silica gel column chromatography (hexane/ethyl acetate = 30:70) to afford the corresponding product.

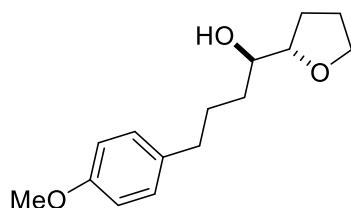

(*R*<sup>\*</sup>)-4-(4-methoxyphenyl)-1-((*S*<sup>\*</sup>)-tetrahydrofuran-2-yl)butan-1-ol

**Compound S74:** Synthesized using General Procedure D on a 0.2 mmol scale; Purified using 30% EtOAc/hexanes on silica gel; single diastereomer; (white solid, 30 mg, 0.120 mmol, 60% yield).

<sup>1</sup>H NMR (400 MHz, CDCl<sub>3</sub>) 7.13 – 7.05 (m, 2H), 6.86 – 6.77 (m, 2H), 3.89 – 3.80 (m, 2H), 3.78 (s, 3H), 3.77 – 3.71 (m, 2H), 2.58 (t, *J* = 7.7 Hz, 2H), 1.95 – 1.69 (m, 5H), 1.69 – 1.58 (m, 1H), 1.50 – 1.36 (m, 2H).

<sup>13</sup>C{<sup>1</sup>H} (101 MHz, CDCl<sub>3</sub>) δ 157.8, 134.5, 129.4, 113.8, 82.3, 71.9, 68.6, 55.3, 35.0, 32.4, 28.1, 26.2, 24.6.

IR ν 3435, 2938, 2864, 1611, 1512, 1464, 1246 cm<sup>-1</sup>.

HRMS (ESI-TOF) *m/z* = [M + Na<sup>+</sup>] Calcd C<sub>15</sub>H<sub>22</sub>O<sub>3</sub>Na<sup>+</sup> 273.1467, found 273.1454 (4.8 ppm error).

**Compound S74 (CDCl<sub>3</sub>, <sup>1</sup>H NMR: 400 MHz, <sup>13</sup>C{<sup>1</sup>H} NMR: 101 MHz)**

7.1103  
7.1024  
7.0862  
7.0865  
7.0810  
7.0734  
6.8340  
6.8245  
6.8210  
6.8101  
6.8049  
6.7973  
6.7925  
3.8823  
3.8782  
3.8742  
3.8617  
3.8575  
3.8410  
3.8275  
3.8187  
3.8118  
3.8098  
3.8029  
3.7995  
3.7763  
3.7637  
3.7574  
3.7588  
3.7555  
3.7532  
3.7435  
3.7415  
3.7380  
3.7357  
3.7222  
3.6028  
3.6015  
3.5965  
3.5945  
1.9156  
1.9095  
1.8997  
1.8976  
1.8917  
1.8894  
1.8891  
1.8785  
1.8745  
1.8725  
1.8703  
1.8241  
1.8186  
1.8166  
1.8035  
1.7984  
1.7815  
1.7694  
1.7693  
1.7675  
1.7523  
1.7471  
1.6682  
1.6665  
1.6669  
1.6347  
1.6303  
1.6272  
1.6244  
1.6158  
1.6112  
1.6078  
1.5843  
1.5833  
1.4586  
1.4440  
1.4403  
1.4367  
1.4333  
1.4184  
1.4050  
1.4013

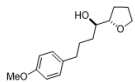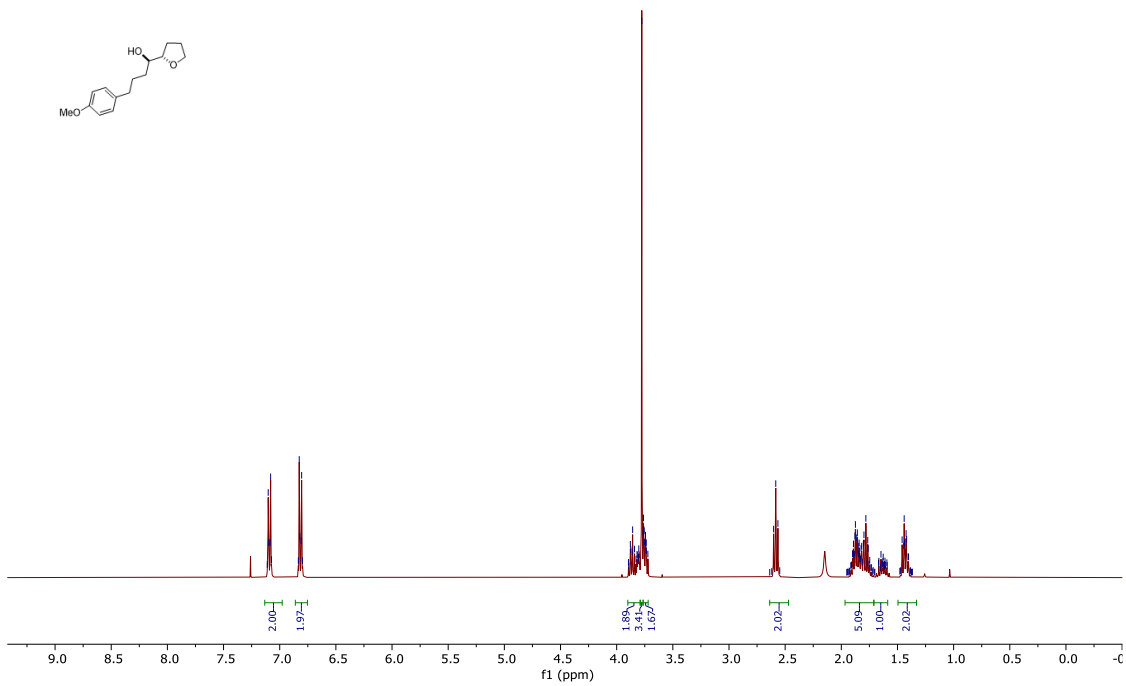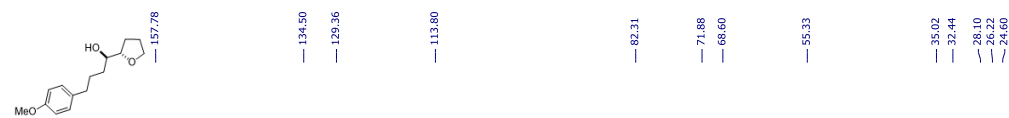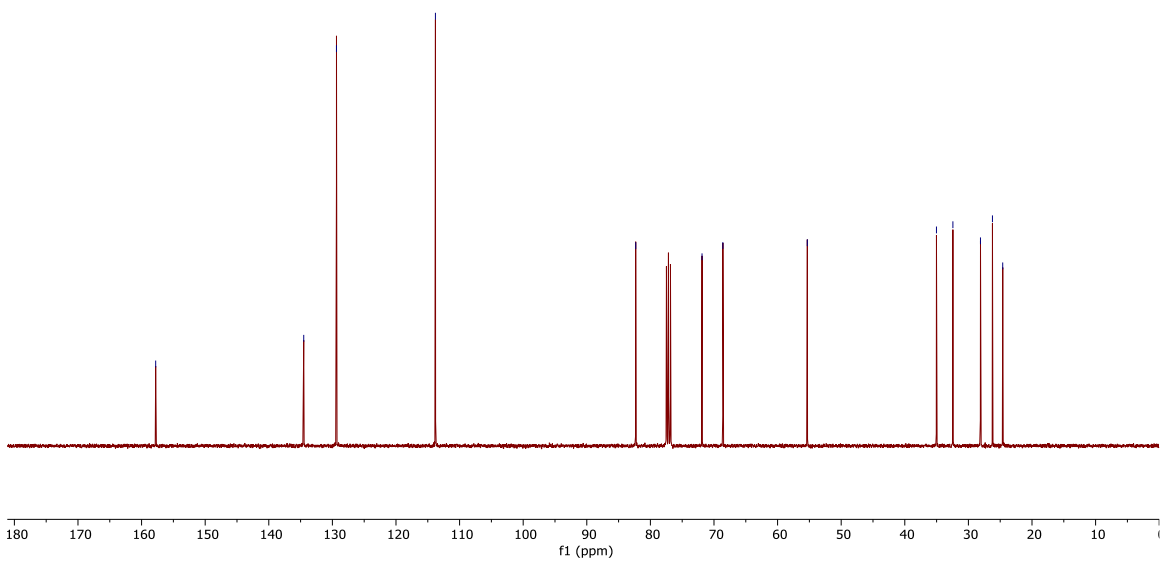

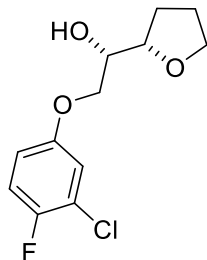

(S\*)-2-(3-chloro-4-fluorophenoxy)-1-((S\*)-tetrahydrofuran-2-yl)ethan-1-ol

**Compound S75:** Synthesized using General Procedure D on a 0.2 mmol scale; Purified using 30% ethyl acetate in hexanes on silica gel; (White solid, 36 mg, 0.14 mmol, 70% yield).

$^1\text{H}$  NMR (400 MHz,  $\text{CDCl}_3$ )  $\delta$  7.03 (t,  $J = 8.8$  Hz, 1H), 6.95 (dd,  $J = 5.9, 3.0$  Hz, 1H), 6.77 (dt,  $J = 9.1, 3.4$  Hz, 1H), 4.04 – 3.94 (m, 3H), 3.92 – 3.78 (m, 3H), 2.02 – 1.90 (m, 3H), 1.90 – 1.79 (m, 1H).

$^{13}\text{C}\{^1\text{H}\}$  (101 MHz,  $\text{CDCl}_3$ )  $\delta$  155.1 (d,  $J = 2.6$  Hz), 153.1 (d,  $J = 241.2$  Hz), 121.2 (d,  $J = 19.1$  Hz), 116.9 (d,  $J = 22.3$  Hz), 116.5, 114.3 (d,  $J = 6.6$  Hz), 79.0, 71.9, 70.7, 68.7, 27.9, 26.3.

$^{19}\text{F}$  NMR (377 MHz,  $\text{CDCl}_3$ )  $\delta$  -126.7 – -126.8 (m).

IR  $\nu$  3438, 2940, 2860, 1600, 1502, 1450, 1246  $\text{cm}^{-1}$ .

HRMS (ESI-TOF)  $m/z = [\text{M} + \text{Na}^+]$  Calcd  $\text{C}_{12}\text{H}_{14}\text{ClFO}_3\text{Na}^+$  283.0513, found 283.0522 (3.2 ppm error).

**Compound S75 ( $\text{CDCl}_3$ ,  $^1\text{H}$  NMR: 400 MHz,  $^{13}\text{C}\{^1\text{H}\}$  NMR: 101 MHz)**

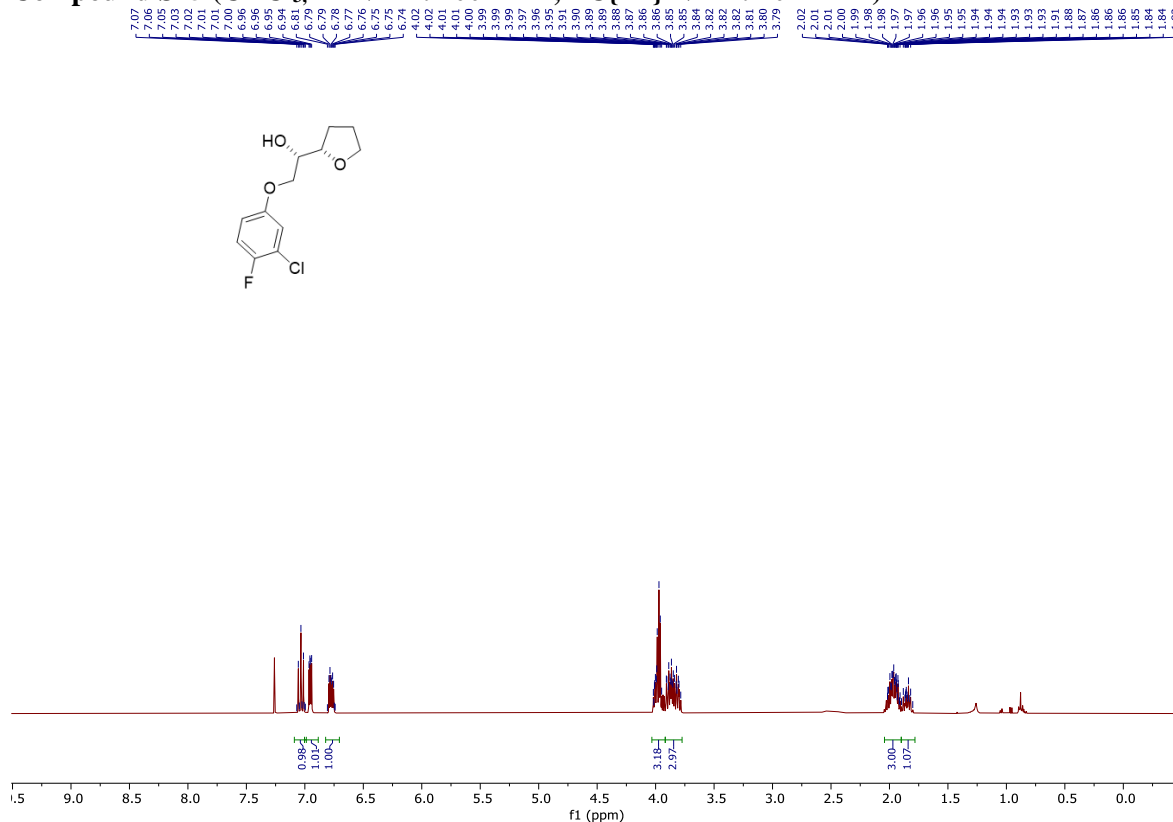

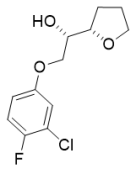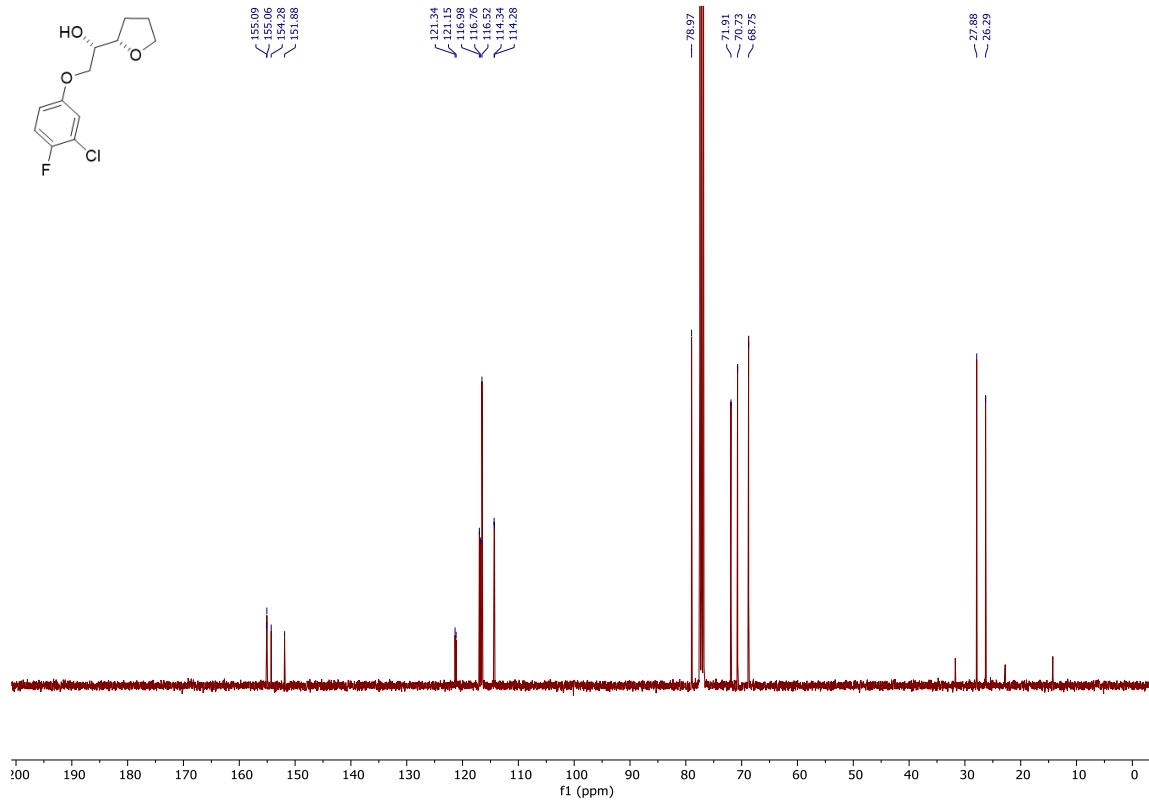

### For silanoxy-tetrahydropyrans

We have acquired 2-D NMR data for **Compound 64**. We have assigned other product identities by analogy to this.

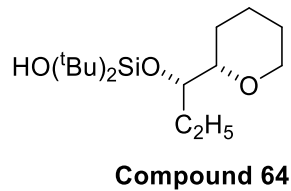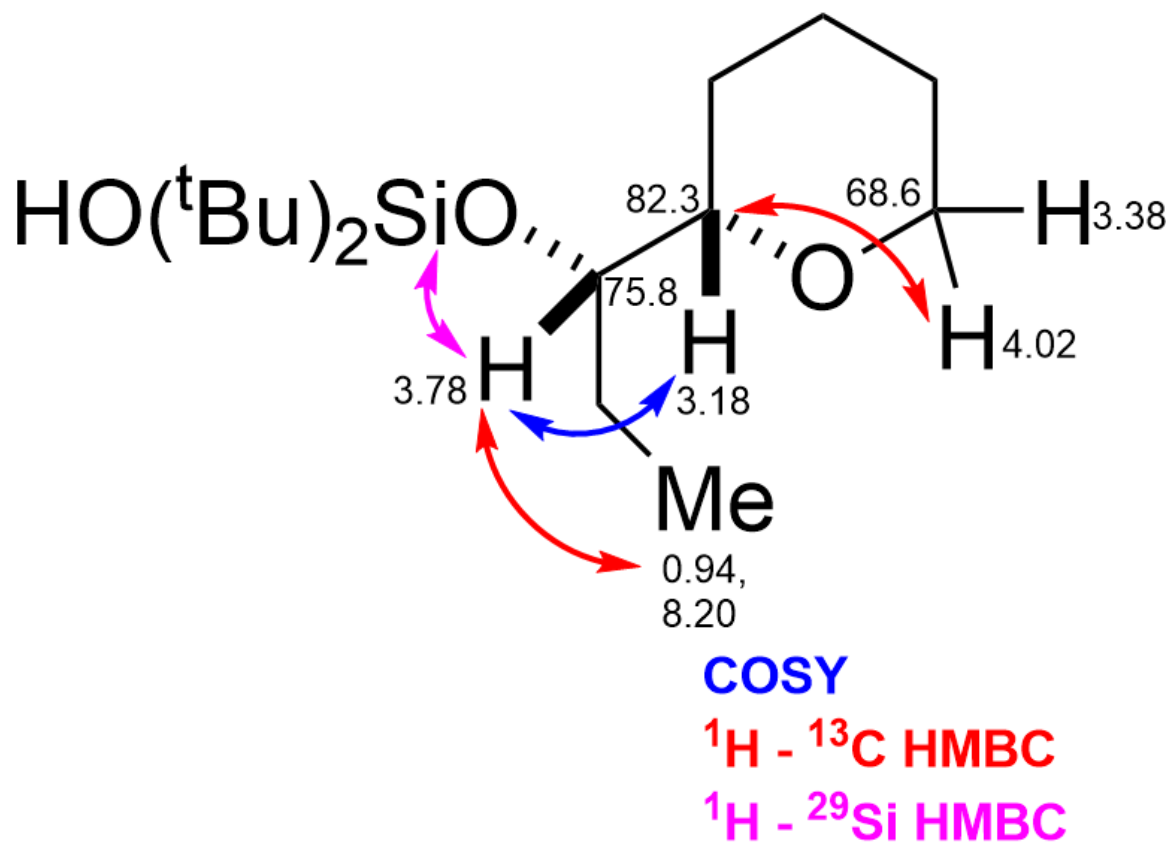

(CDCl<sub>3</sub>, <sup>1</sup>H NMR: 500 MHz)

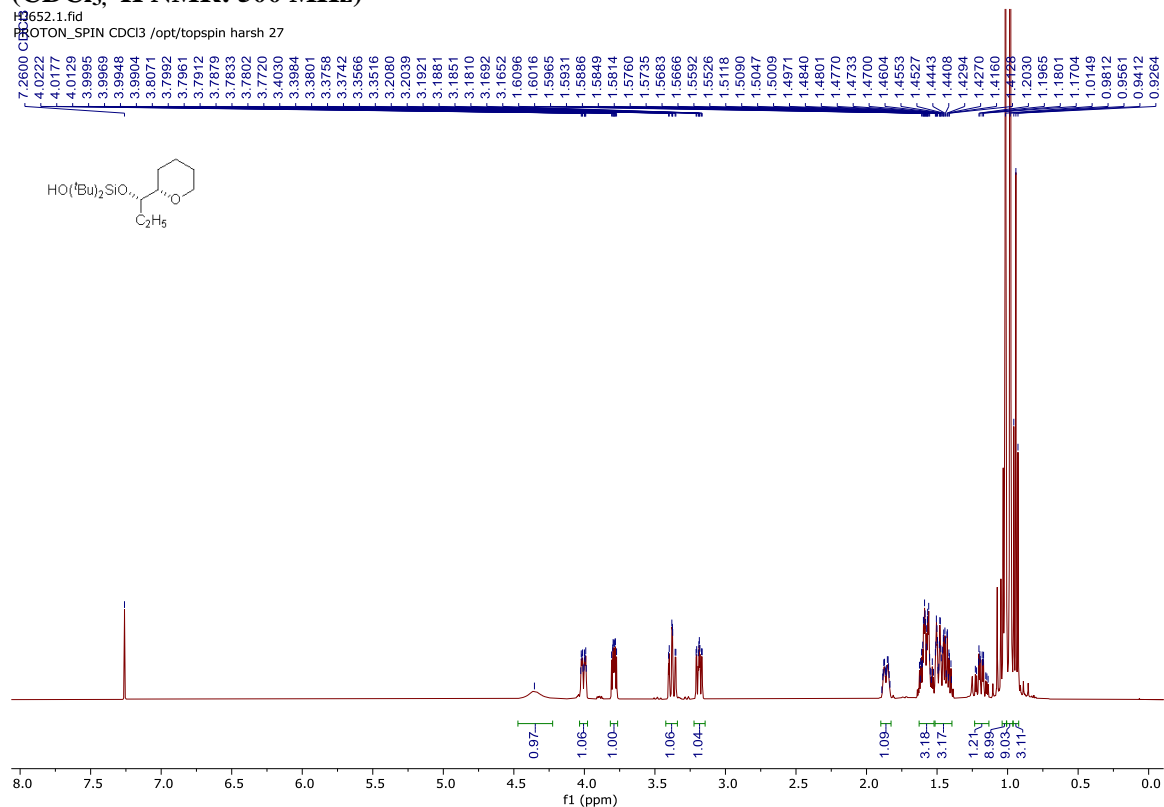

(CDCl<sub>3</sub>, <sup>13</sup>C{<sup>1</sup>H} NMR: 126 MHz)

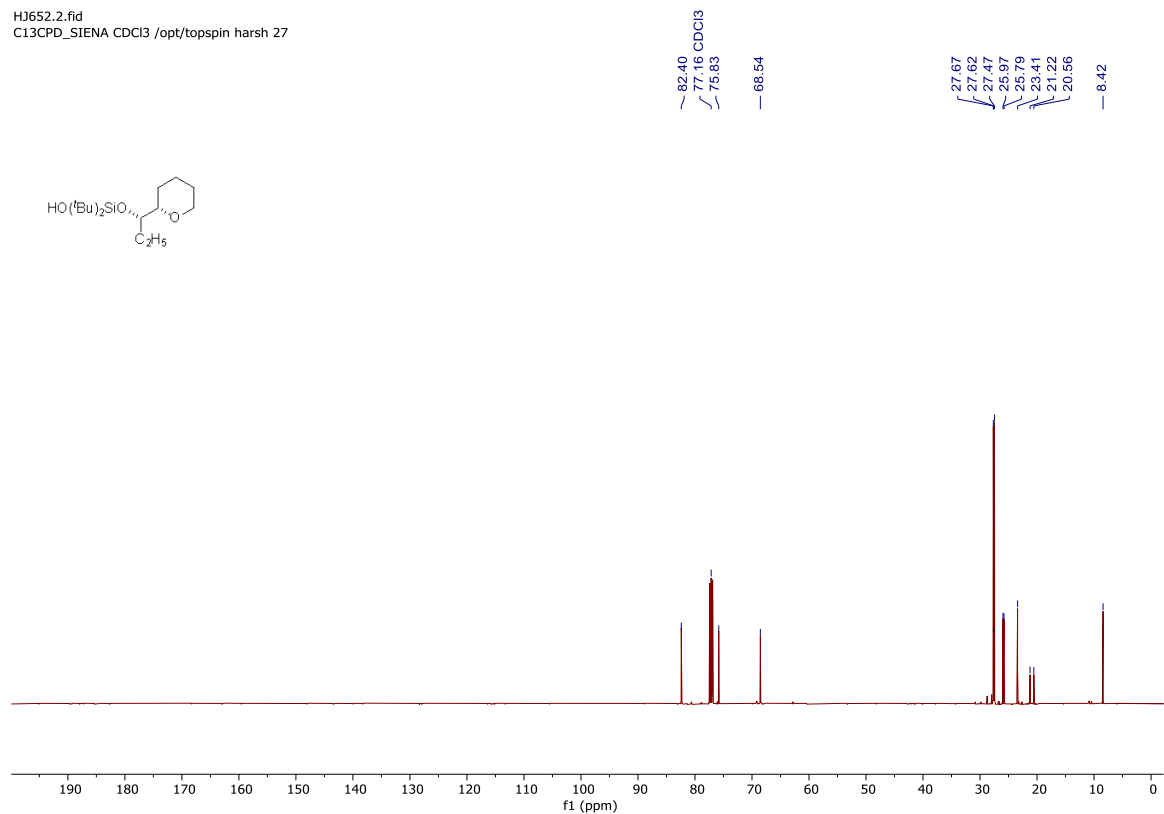



(CDCl<sub>3</sub>, COSY)

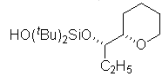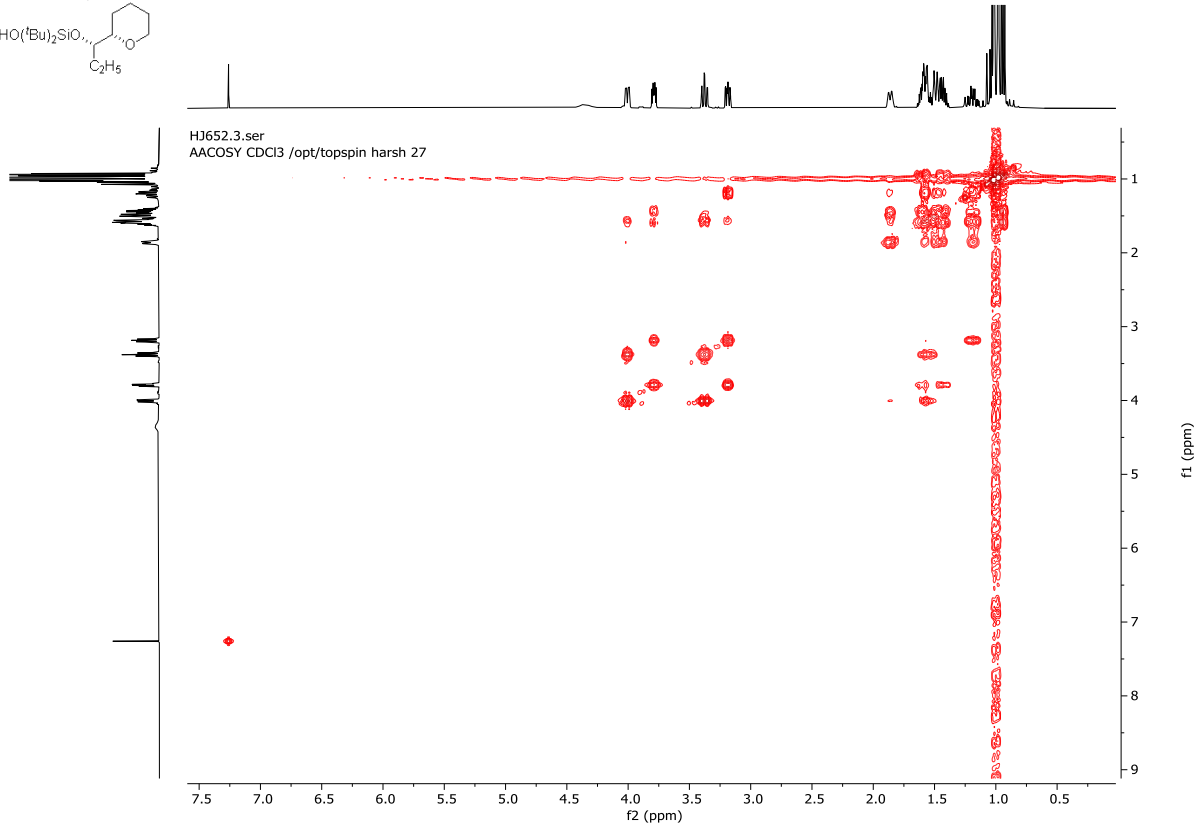

(CDCl<sub>3</sub>, HSQC)

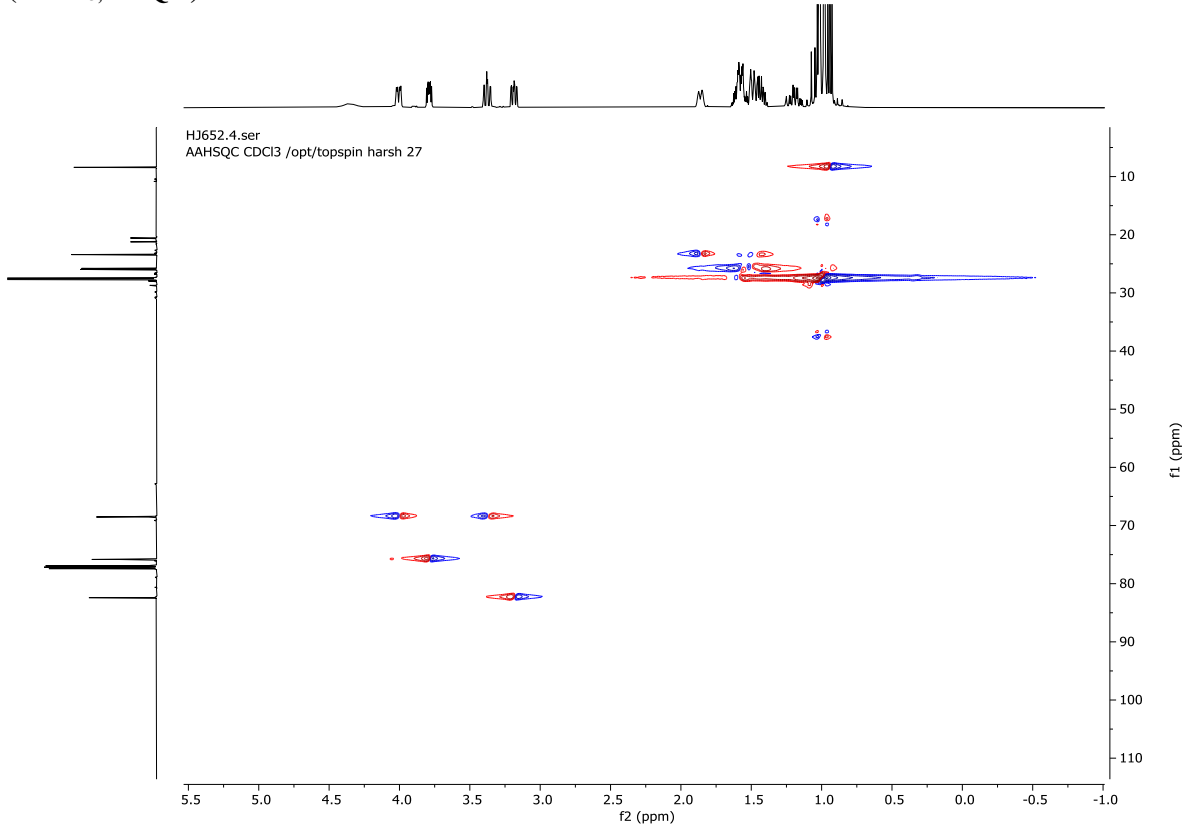

(CDCl<sub>3</sub>, <sup>1</sup>H – <sup>13</sup>C HMBC)

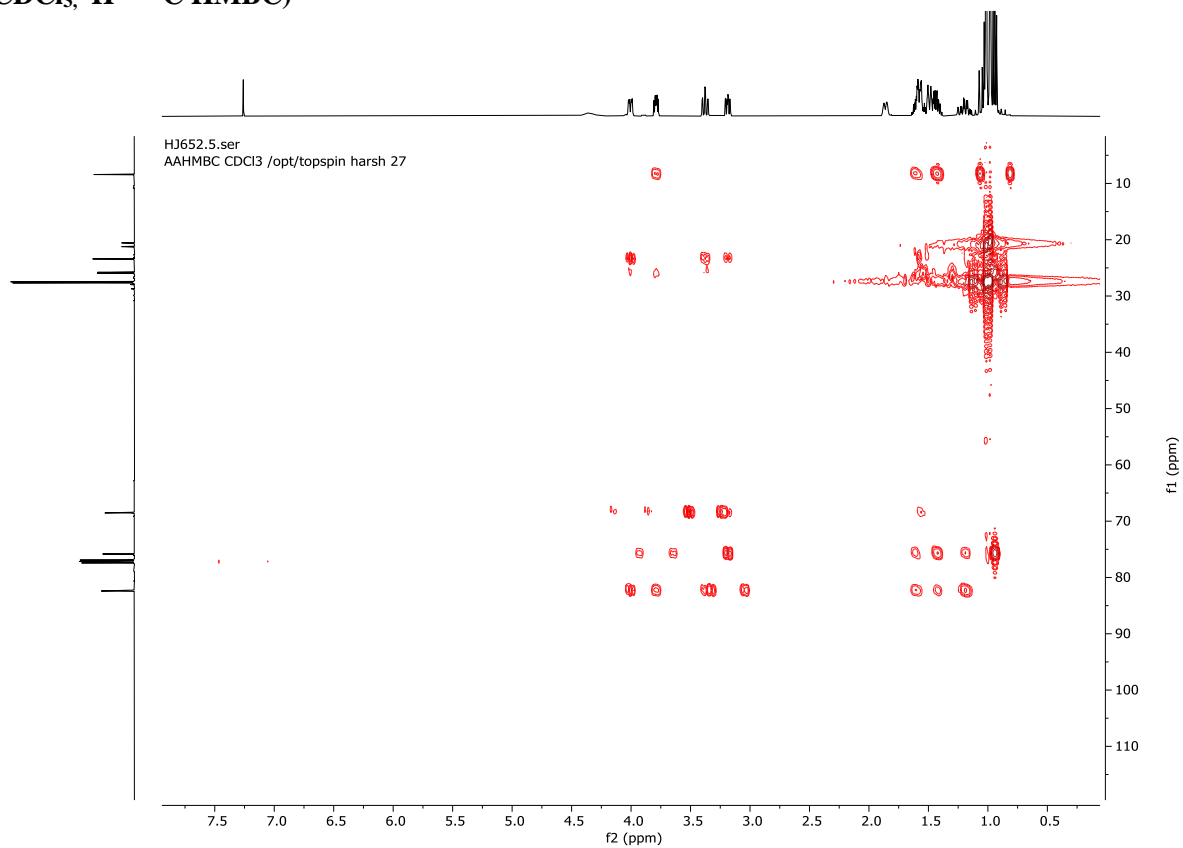

(CDCl<sub>3</sub>, <sup>1</sup>H – <sup>29</sup>Si HMBC)

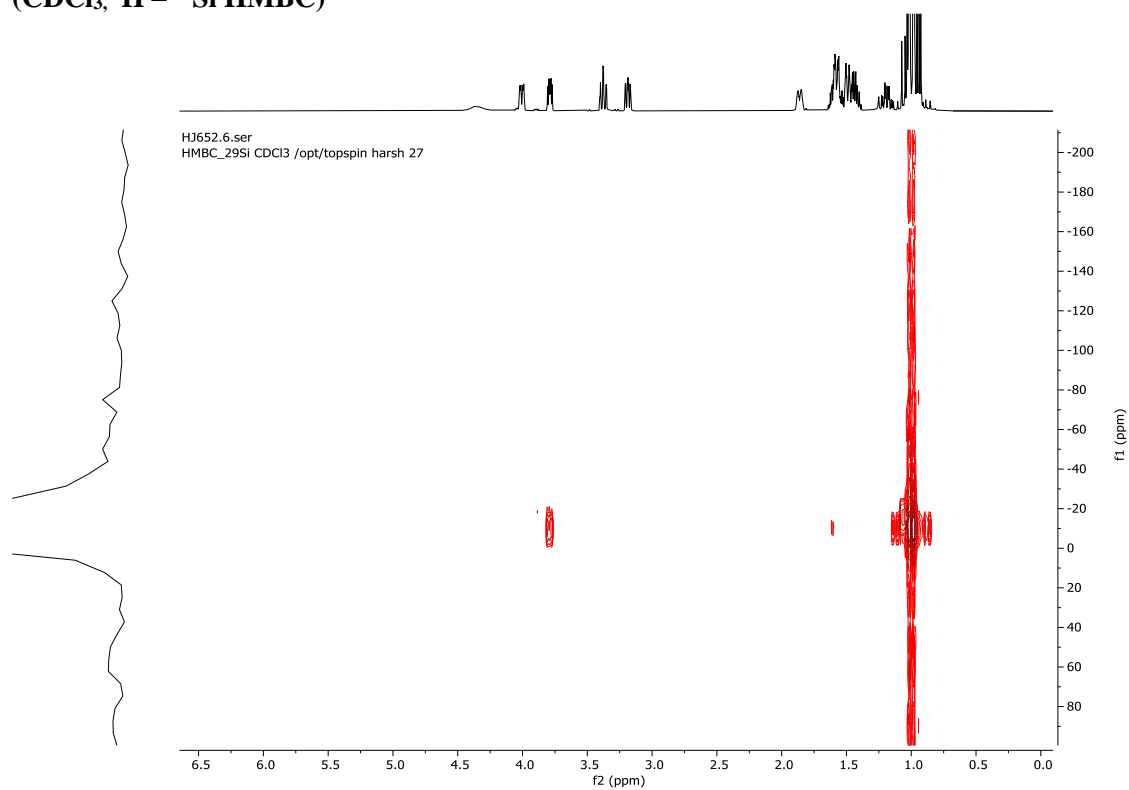

## XI. Control Experiments

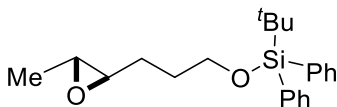

*tert*-butyl(3-((2*R*\*,3*R*\*)-3-methyloxiran-2-yl)propoxy)diphenylsilane

**Compound 75:** Synthesized using General Procedure B on a 1.8 mmol scale; Purified using a gradient of 0-3% acetone in CH<sub>2</sub>Cl<sub>2</sub> on silica gel; single diastereomer; (colorless oil, 407 mg, 1.15 mmol, 64% yield).

<sup>1</sup>H NMR (400 MHz, CDCl<sub>3</sub>) δ 7.72 – 7.58 (m, 4H), 7.50 – 7.29 (m, 6H), 3.76 – 3.62 (m, 2H), 2.73 (qd, *J* = 5.2, 2.3 Hz, 1H), 2.66 – 2.56 (m, 1H), 1.79 – 1.55 (m, 4H), 1.27 (d, *J* = 5.2 Hz, 3H), 1.06 (s, 9H).

<sup>13</sup>C{<sup>1</sup>H} NMR (101 MHz, CDCl<sub>3</sub>) δ 135.7, 134.0, 129.7, 127.8, 63.5, 59.6, 54.8, 29.1, 28.7, 27.0, 19.4, 17.8.

IR ν 3060, 2958, 2930, 2857, 1473, 1112, 701, 504 cm<sup>-1</sup>.

HRMS (ESI) *m/z* = [*M* + Na<sup>+</sup>] calculated for C<sub>22</sub>H<sub>30</sub>O<sub>2</sub>SiNa<sup>+</sup> 377.1913, Found 377.1941 (7.4 ppm error).

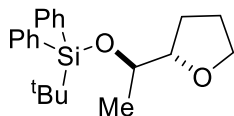

*tert*-butyl diphenyl((*R*\*)-1-((*S*\*)-tetrahydrofuran-2-yl)ethoxy)silane

**Compound 76:** Synthesized using General Procedure C on a 0.2 mmol scale.; Purified using a gradient of 1-4% diethyl ether in hexane on silica gel; single diastereomer; (colorless oil, 21.2 mg, 0.060 mmol, 30% yield).

<sup>1</sup>H NMR (400 MHz, CDCl<sub>3</sub>) δ 7.75 – 7.67 (m, 4H), 7.44 – 7.33 (m, 6H), 3.88 (qd, *J* = 6.2, 4.7 Hz, 1H), 3.85 – 3.78 (m, 1H), 3.77 – 3.66 (m, 2H), 1.96 – 1.75 (m, 4H), 1.07 (s, 9H), 1.00 (d, *J* = 6.3 Hz, 3H).

<sup>13</sup>C{<sup>1</sup>H} NMR (101 MHz, CDCl<sub>3</sub>) δ 136.2, 136.1, 135.0, 134.2, 129.6 (2C), 127.6, 127.5, 83.8, 71.6, 68.6, 27.2, 27.0, 26.1, 20.6, 19.5.

IR ν 3070, 3050, 2930, 2857, 1473, 1112, 1080, 945, 822, 738, 701, 610, 509 cm<sup>-1</sup>.

HRMS (ESI) *m/z*: [*M* + Na<sup>+</sup>] calculated for C<sub>22</sub>H<sub>30</sub>O<sub>2</sub>SiNa<sup>+</sup> 377.1913, Found 377.1941 (error 7.4 ppm).

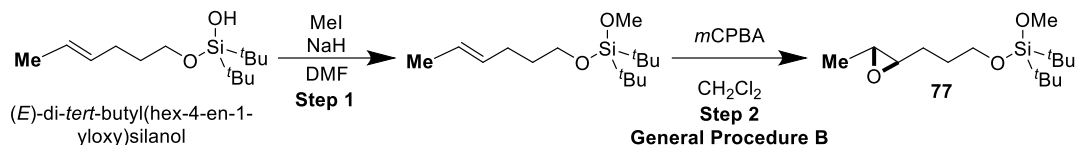

Sodium hydride (50.0 mg, 2.0 mmol, 2.0 equiv) was added to the ice-cold solution of (E)-di-tert-butyl(hex-4-en-1-yloxy)silanol (258 mg, 1.0 mmol, 1.0 equiv) in dimethylformamide (2.0 mL). The mixture was stirred for 20 minutes at the same temperature then MeI (426 mg, 3.0 mmol, 3.0 equiv) was slowly added to it. The reaction mixture was allowed to warm to room temperature and stirred for 16 h. Next, the reaction was quenched with water and diluted with diethyl ether (15 mL). The organic layer was separated, washed with water (10 mL x 2), and dried over anhydrous Na<sub>2</sub>SO<sub>4</sub>. The solvent was removed *in vacuo* and the crude product was directly subjected to epoxidation following [General Procedure B](#).

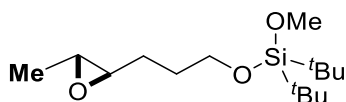

di-tert-butyl(methoxy)(3-((2R\*,3R\*)-3-methyloxiran-2-yl)propoxy)silane

**Compound 77:** The title compound was purified using a gradient of 0-3% acetone in CH<sub>2</sub>Cl<sub>2</sub> on silica gel; single diastereomer; (colorless oil, 224 mg, 0.777 mmol, 78% yield over two steps).

<sup>1</sup>H NMR (600 MHz, CDCl<sub>3</sub>) δ 3.91 – 3.82 (m, 2H), 3.63 (s, 3H), 2.77 (qd, *J* = 5.2, 2.2 Hz, 1H), 2.68 (ddd, *J* = 6.5, 4.8, 2.2 Hz, 1H), 1.77 – 1.64 (m, 3H), 1.62 – 1.57 (m, 1H), 1.30 (d, *J* = 5.2 Hz, 3H), 1.00 (s, 18H).

<sup>13</sup>C{<sup>1</sup>H} NMR (101 MHz, CDCl<sub>3</sub>) δ 63.5, 59.7, 54.8, 52.3, 29.4, 28.7, 28.0, 21.3, 17.8.

IR ν 2965, 2934, 2860, 1473, 1105, 827, 651 cm<sup>-1</sup>.

HRMS (ESI) *m/z* = [M + Na<sup>+</sup>] calculated for C<sub>15</sub>H<sub>32</sub>O<sub>3</sub>SiNa<sup>+</sup> 311.2018, Found 311.2042 (7.7 ppm error).

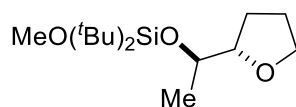

di-tert-butyl(methoxy)((R\*)-1-((S\*)-tetrahydrofuran-2-yl)ethoxy)silane

**Compound 78:** Synthesized using General Procedure C on a 0.2 mmol scale.; Purified using a gradient of 1-4% diethyl ether in hexane on silica gel; single diastereomer; (colorless oil, 34.6 mg, 0.120 mmol, 60% yield).

<sup>1</sup>H NMR (400 MHz, CDCl<sub>3</sub>) δ 4.15 (qd, *J* = 6.3, 4.6 Hz, 1H), 3.88 – 3.82 (m, 1H), 3.78 – 3.69 (m, 2H), 3.66 (s, 3H), 1.94 – 1.80 (m, 4H), 1.23 (d, *J* = 6.2 Hz, 3H), 1.03 (s, 9H), 1.01 (s, 9H).

<sup>13</sup>C{<sup>1</sup>H} NMR (101 MHz, CDCl<sub>3</sub>) δ 84.1, 71.1, 68.6, 52.4, 28.1, 26.6, 26.1, 21.5, 21.2, 20.9.

IR ν 2970, 2888, 2859, 1473, 1088, 827, 650 cm<sup>-1</sup>.

HRMS (ESI)  $m/z = [M + Na^+]$  calculated for  $C_{15}H_{32}O_3SiNa^+$  311.2018, Found 311.2036 (5.8 ppm error).

We have also found that one-pot epoxidation-cyclization reactions of alkenyl alcohols are possible using *m*CPBA, but the mass balance and product yields of these reactions are generally poor. For a representative example:

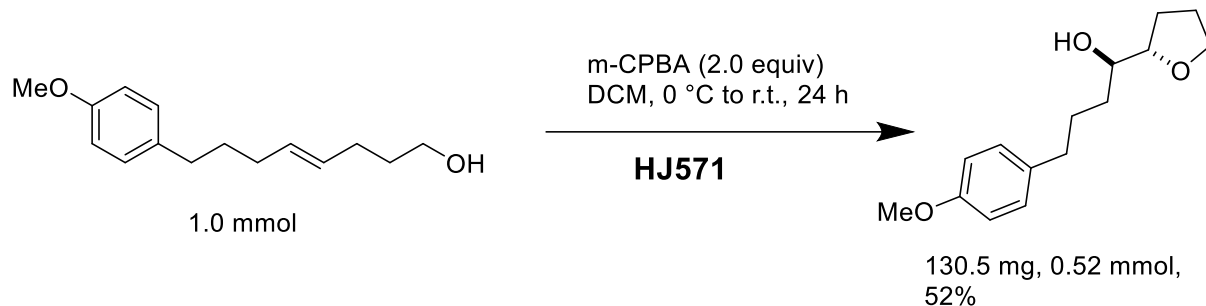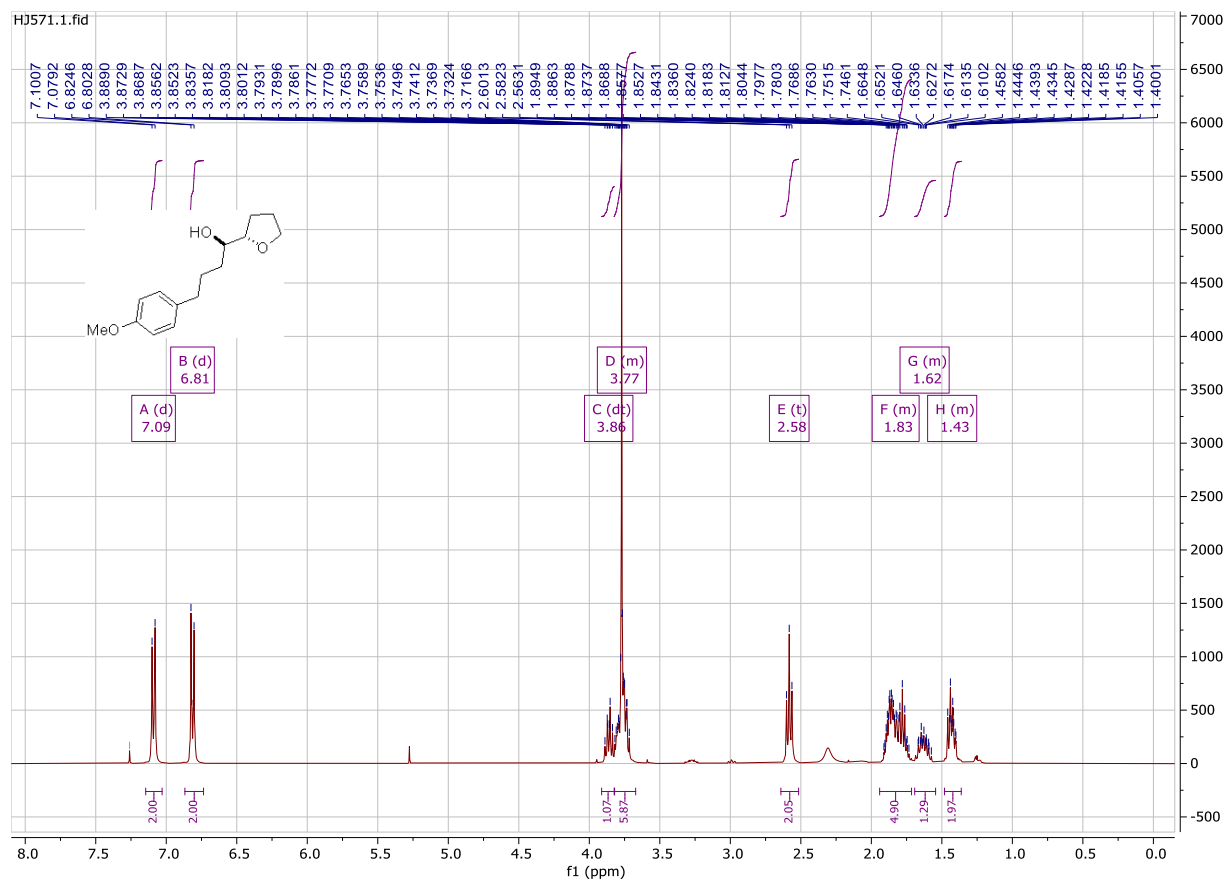

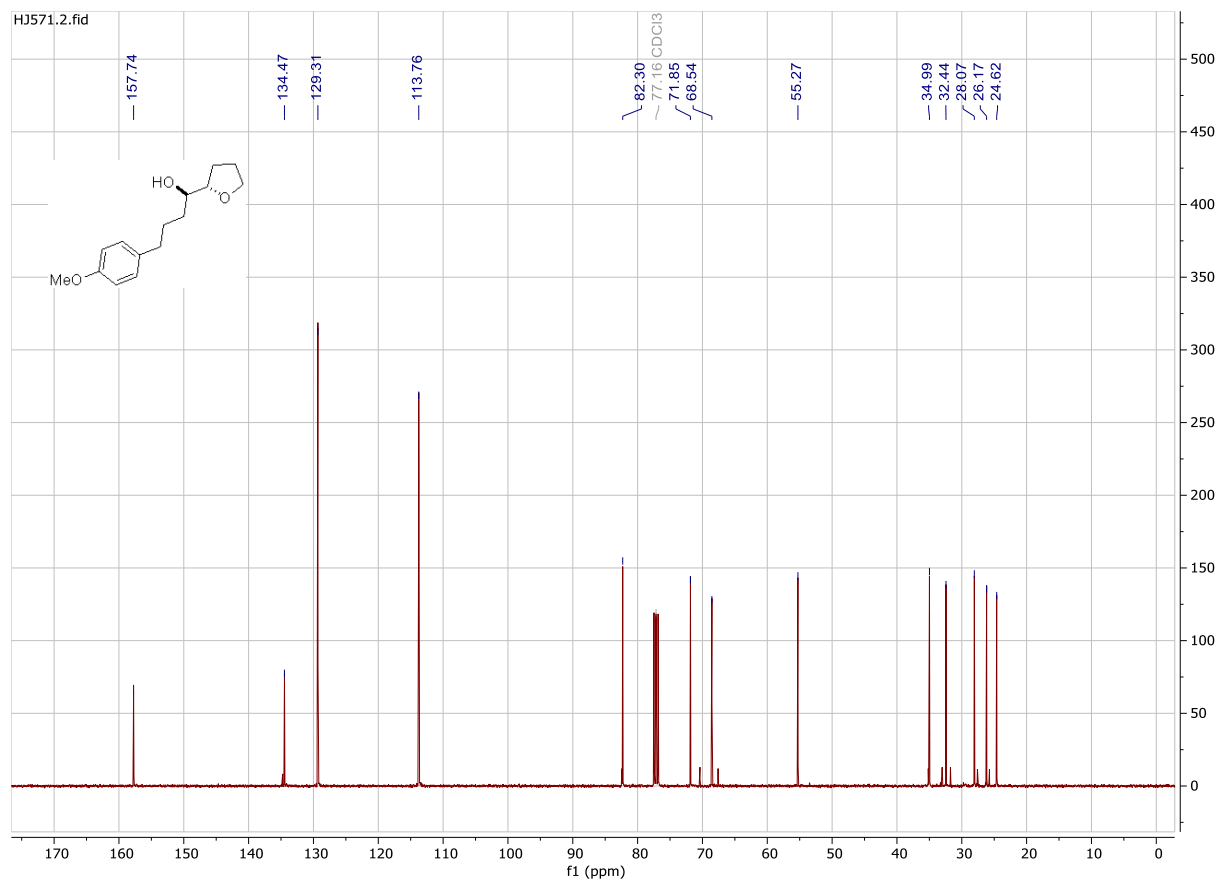

## XII. Natural Products

### For (±)-Solerone

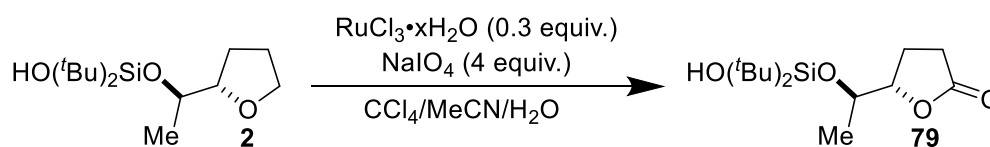

An oven-dried 20 mL microwave vial was charged with a stir bar, silanoxy-tetrahydrofuran substrate **2** (548.4 mg, 2.0 mmol, 1.0 equiv), NaIO<sub>4</sub> (1.72 g, 8.0 mmol, 4.0 equiv) and a solvent mixture of CCl<sub>4</sub> (6.0 mL), MeCN (5.0 mL), and H<sub>2</sub>O (4.0 mL) (Final concentration: 0.13 M). The resulting heterogeneous mixture was stirred vigorously at room temperature for 5 minutes, and RuCl<sub>3</sub>·xH<sub>2</sub>O (125.0 mg, 0.6 mmol, 0.3 equiv) was added to it in one portion. Upon stirring for 1 hour at room temperature, the reaction mixture was treated with 2-propanol (4.0 mL) and stirred vigorously for an additional 1 h. The mixture was transferred to a separatory funnel and extracted with CH<sub>2</sub>Cl<sub>2</sub>. The organic layer was dried over anhydrous Na<sub>2</sub>SO<sub>4</sub> and concentrated under reduced pressure. The resulting residue was purified by chromatography on silica gel to obtain the desired product using a gradient of 2.0 to 6.0% acetone in CH<sub>2</sub>Cl<sub>2</sub> on silica gel).

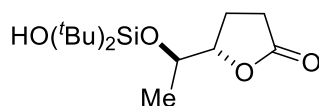

(*S*<sup>\*</sup>)-5-((*R*<sup>\*</sup>)-1-((di-*tert*-butyl(hydroxy)silyl)oxy)ethyl)dihydrofuran-2(3*H*)-one

**Compound 79:** single diastereomer; (colorless oil, 263.2 mg, 0.912 mmol, 46% yield).

<sup>1</sup>H NMR (400 MHz, CDCl<sub>3</sub>) δ 4.44 (qd, *J* = 6.4, 2.8 Hz, 1H), 4.37 (td, *J* = 7.3, 2.8 Hz, 1H), 2.83 (s, 1H), 2.60 – 2.44 (m, 2H), 2.33 (dddd, *J* = 12.6, 10.2, 8.5, 7.2 Hz, 1H), 2.12 (dddd, *J* = 12.9, 9.4, 7.5, 5.6 Hz, 1H), 1.19 (d, *J* = 6.5 Hz, 3H), 1.00 (s, 9H), 0.97 (s, 9H).

<sup>13</sup>C{<sup>1</sup>H} NMR (101 MHz, CDCl<sub>3</sub>) δ 177.7, 84.0, 68.3, 28.7, 27.63, 27.58, 20.7, 20.6, 20.4, 19.1.

IR ν 3485, 2934, 2857, 1762, 1473, 1200, 1154, 1084, 1012, 826, 648 cm<sup>-1</sup>.

HRMS (ESI) *m/z* = [*M* + Na<sup>+</sup>] calculated for C<sub>14</sub>H<sub>28</sub>O<sub>4</sub>SiNa<sup>+</sup> 311.1655, Found 311.1664 (2.9 ppm error).

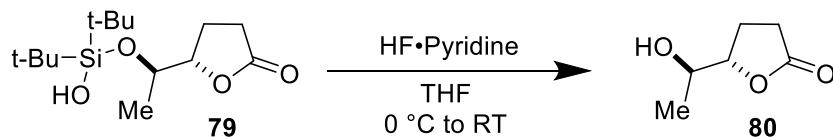

HF-pyridine (~70% HF-30% pyridine, 0.240 mL of solution, 0.264 g of solution, 0.185 g HF, 9.2 mmol, 32 equiv.) was carefully added to an ice-cold solution of compound **79** (84.0 mg, 0.29 mmol, 1 equiv.) in THF (3 mL, ~0.1 M). The homogenous mixture was allowed to warm to room temperature and stirred for 36 h. After completion, the reaction was quenched with saturated aqueous NaHCO<sub>3</sub> solution, transferred to a separatory funnel, and extracted with ethyl acetate (15 mL x 3). The combined organic layers were dried with anhydrous Na<sub>2</sub>SO<sub>4</sub> and concentrated *in vacuo*. The residue was purified using a gradient of 15 to 50% EtOAc in hexane on silica gel to give **80** (colorless oil, 27.4 mg, 0.21 mmol, 73% yield).

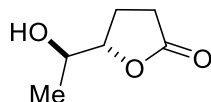

(*S*<sup>\*</sup>)-5-((*R*<sup>\*</sup>)-1-hydroxyethyl)dihydrofuran-2(3*H*)-one

**Compound 80:**

<sup>1</sup>H NMR (400 MHz, CDCl<sub>3</sub>) δ 4.40 (td, *J* = 7.3, 3.3 Hz, 1H), 4.11 (qd, *J* = 6.6, 3.3 Hz, 1H), 2.65 – 2.45 (m, 2H), 2.34 – 2.10 (m, 3H), 1.18 (d, *J* = 6.6 Hz, 3H).

<sup>13</sup>C{<sup>1</sup>H} NMR (101 MHz, CDCl<sub>3</sub>) δ 177.7, 83.7, 67.5, 28.8, 21.1, 17.8.

IR ν 3435, 2976, 2936, 1767, 1460, 1197, 916 cm<sup>-1</sup>.

HRMS (ESI)  $m/z = [M + H^+]$  Calcd for  $C_6H_{11}O_3^+$  131.0703, found 131.0693 (7.6 ppm error).

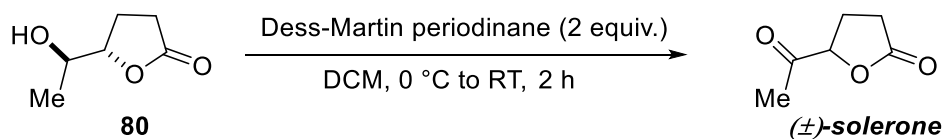

A 20 mL round-bottom flask was charged with a stir-bar, **80** (0.049 g, 0.38 mmol, 1 equiv.), and anhydrous DCM (5 mL). The reaction flask was cooled to 0 °C using an ice-water bath. Subsequently, Dess-Martin periodinane (326 mg, 0.769 mmol, 2 equiv.) was added in a single portion. The reaction mixture was allowed to warm to room temperature over a period of 2 hours. After this time, the reaction was quenched with saturated aqueous sodium thiosulfate solution, and this mixture was stirred for 1 hour. Following this time, the reaction mixture was transferred to a separatory funnel and extracted with DCM (2 x 10 mL). The combined organic layers were dried over anhydrous  $MgSO_4$ , and the solvent was removed *in vacuo*. The resulting residue was purified through silica gel column chromatography (gradient of 0 to 50% ethyl acetate/hexanes) to give **(±)-solerone** as a colorless oil (40 mg, 0.31 mmol, 82% yield).

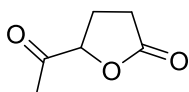

5-acetyldihydrofuran-2(3H)-one

**(±)-Solerone:**

$^1H$  NMR (400 MHz,  $CDCl_3$ )  $\delta$  4.87 – 4.79 (m, 1H), 2.62 – 2.44 (m, 3H), 2.29 (s, 3H), 2.28 – 2.21 (m, 1H).

$^{13}C\{^1H\}$  (101 MHz,  $CDCl_3$ )  $\delta$  205.5, 176.0, 82.0, 27.4, 26.3, 24.5.

IR  $\nu$  2961, 1789, 1715, 1361, 1100, 850  $cm^{-1}$ .

HRMS (ESI-TOF)  $m/z = [M + Na^+]$  Calcd  $C_6H_8O_3Na^+$  151.0371, found 151.0378 (4.6 ppm error).

**Comparison of shifts with what is reported in *Org. Biomol. Chem.* 2014, 12, 5601 – 5610.**

| $^1H$ NMR (400 MHz, $CDCl_3$ ) | Lit. $^1H$ NMR (500 MHz, $CDCl_3$ ) | $^{13}C$ NMR (101 MHz) | Lit. $^{13}C$ NMR (125 MHz) |
|--------------------------------|-------------------------------------|------------------------|-----------------------------|
| 4.87 – 4.79 (m, 1H)            | 4.80 (m, 1H)                        | 205.5                  | 205.2                       |
| 2.62 – 2.44 (m, 3H)            | 2.54–2.43 (m, 3H)                   | 176.0                  | 175.9                       |
| 2.29 (s, 3H)                   | 2.23 (s, 3H)                        | 82.0                   | 81.8                        |
| 2.28 – 2.21 (m, 1H)            | 2.22–2.15 (m, 1H)                   | 27.4                   | 27.1                        |
|                                |                                     | 26.3                   | 26.0                        |
|                                |                                     | 24.5                   | 24.3                        |

**For (±)-muricatacin**



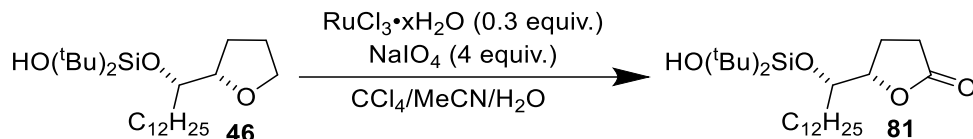

An oven-dried 20 mL microwave vial was charged with a stir bar, silanoxy-tetrahydrofuran substrate **46** (300.0 mg, 0.7 mmol, 1.0 equiv), NaIO<sub>4</sub> (600.0 mg, 2.8 mmol, 4.0 equiv), and a mixed solvent system of CCl<sub>4</sub> (2.2 mL)/MeCN (1.8 mL)/H<sub>2</sub>O (1.5 mL) (Final concentration: 0.13 M). The resulting heterogeneous mixture was stirred vigorously at room temperature for 5 minutes, and RuCl<sub>3</sub>·xH<sub>2</sub>O (44.0 mg, 0.21 mmol, 0.3 equiv) was added to it in one portion. Upon stirring for 1 hour at room temperature, the reaction mixture was treated with 2-propanol (1.5 mL) and stirred vigorously for an additional 1 h. The mixture was transferred to a separatory funnel and extracted with CH<sub>2</sub>Cl<sub>2</sub>. The organic layer was dried over anhydrous Na<sub>2</sub>SO<sub>4</sub> and concentrated under reduced pressure. The resulting residue was purified by chromatography on silica gel to obtain the desired product using a gradient of 2.0 to 6.0% acetone in CH<sub>2</sub>Cl<sub>2</sub> on silica gel.

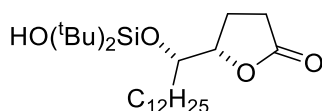

(*S*\*)-5-((*S*\*)-1-((di-*tert*-butyl(hydroxy)silyl)oxy)tridecyl)dihydrofuran-2(3*H*)-one

**Compound 81:** single diastereomer; (colorless oil, 152.5 mg, 0.346 mmol, 49% yield)

<sup>1</sup>H NMR (400 MHz, CDCl<sub>3</sub>) δ 4.47 (dt, *J* = 8.3, 6.7 Hz, 1H), 4.01 (q, *J* = 5.5 Hz, 1H), 2.67 – 2.35 (m, 3H), 2.28 – 2.17 (m, 1H), 2.08 – 1.93 (m, 1H), 1.68 – 1.57 (m, 1H), 1.56 – 1.34 (m, 3H), 1.31 – 1.22 (m, 18H), 1.02 (s, 9H), 1.01 (s, 9H), 0.87 (t, *J* = 6.7 Hz, 3H).

<sup>13</sup>C{<sup>1</sup>H} NMR (101 MHz, CDCl<sub>3</sub>) δ 176.7, 83.1, 75.0, 32.8, 32.1, 30.0, 29.8 (3C), 29.7, 29.6, 29.5, 29.0, 27.7 (2C), 24.5, 24.3, 22.8, 20.8, 20.7, 14.3.

IR ν 3485, 2927, 2856, 1765, 1468, 1191, 1136, 1113, 1012, 827, 646 cm<sup>-1</sup>.

HRMS (ESI) *m/z*: [M + Na<sup>+</sup>] calculated for C<sub>25</sub>H<sub>50</sub>O<sub>4</sub>SiNa<sup>+</sup> 465.3376, Found 465.3396 (4.3 ppm error).

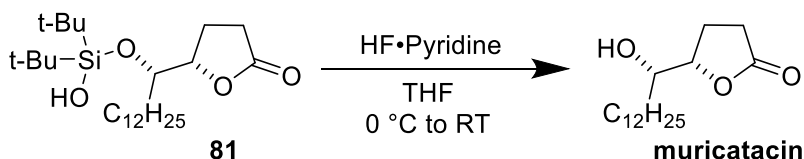

HF-pyridine (~70% HF-30% pyridine, 0.290 mL, 0.319 g, 15.9 mmol, 46 equiv.) was carefully added to an ice-cold solution of **81** (153 mg, 0.346 mmol, 1 equiv.) in THF (3.5 mL, ~0.1 M). The homogenous mixture was allowed to warm to room temperature and stirred for 72 h. After completion, the reaction was quenched with saturated aqueous NaHCO<sub>3</sub> solution, transferred to a separatory funnel, and extracted with

ethyl acetate (20 mL x 3). The combined organic layers were concentrated *in vacuo* after drying over anhydrous Na<sub>2</sub>SO<sub>4</sub>. The residue was purified using a gradient of 15 to 50% EtOAc in hexane on silica gel to give **muricatacin** (white solid, 90.0 mg, 0.316 mmol, 91% yield).

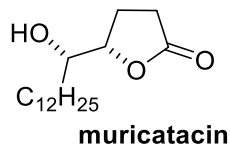

**Muricatacin:**

<sup>1</sup>H NMR (400 MHz, CDCl<sub>3</sub>) δ 4.41 (td, *J* = 7.4, 4.6 Hz, 1H), 3.64 – 3.49 (m, 1H), 2.68 – 2.46 (m, 2H), 2.25 (dddd, *J* = 12.6, 9.6, 7.3, 5.0 Hz, 1H), 2.18 – 2.04 (m, 1H), 1.89 (s, 1H), 1.61 – 1.43 (m, 3H), 1.43 – 1.09 (m, 19H), 0.87 (t, *J* = 6.8 Hz, 3H).

<sup>13</sup>C {<sup>1</sup>H} NMR (101 MHz, CDCl<sub>3</sub>) δ 177.5, 83.1, 73.7, 33.1, 32.0, 29.8, 29.75, 29.73, 29.6, 29.4, 28.8, 25.6, 24.2, 22.8, 14.2.

IR ν 3412, 2954, 2914, 2849, 1732, 1471, 1199 cm<sup>-1</sup>.

HRMS (ESI) *m/z* = [M + H<sup>+</sup>] calcd for C<sub>17</sub>H<sub>33</sub>O<sub>3</sub><sup>+</sup> 285.2430, found 285.2456 (9.1 ppm error).

<sup>1</sup>H NMR comparison with literature values (*Tetrahedron Lett.* **1991**, 32, 1137–1140)

| Our synthetic sample, 400 MHz, CDCl <sub>3</sub>   | Literature values 500 MHz, CDCl <sub>3</sub> |
|----------------------------------------------------|----------------------------------------------|
| δ 4.41 (td, <i>J</i> = 7.4, 4.6 Hz, 1H)            | 4.43 (1H dt)                                 |
| 3.64 – 3.49 (m, 1H)                                | 3.58 (1H m)                                  |
| 2.68 – 2.46 (m, 2H)                                | 2.63, 1H (dt), 2.54, 1H (dt)                 |
| 2.25 (dddd, <i>J</i> = 12.6, 9.6, 7.3, 5.0 Hz, 1H) | 2.25 (1H ddt)                                |
| 2.18 – 2.04 (m, 1H)                                | 2.12, 1 H (ddt)                              |
| 1.89 (s, 1H)                                       |                                              |
| 1.61 – 1.43 (m, 3H)                                | 1.52 (2H m)                                  |
| 1.43 – 1.09 (m, 19H)                               | 1.4–1.3 (20H m)                              |
| 0.87 (t, <i>J</i> = 6.8 Hz, 3H)                    | 0.87 (3H t 6.8)                              |

<sup>13</sup>C {<sup>1</sup>H} NMR comparison with literature values (*Tetrahedron Lett.* **1991**, 32, 1137–1140)

| Our synthetic sample, 101 MHz, CDCl <sub>3</sub> | Literature values 125 MHz, CDCl <sub>3</sub> |
|--------------------------------------------------|----------------------------------------------|
| 177.5                                            | 177.14                                       |
| 83.1                                             | 82.92                                        |
| 73.7                                             | 73.65                                        |
| 33.1                                             | 32.92                                        |
| 32.0                                             | 32.88–22.65                                  |
| 29.8                                             |                                              |

|       |             |
|-------|-------------|
| 29.75 |             |
| 29.73 |             |
| 29.6  |             |
| 29.4  |             |
| 28.8  | 28.67       |
| 25.6  | 32.88-22.65 |
| 24.2  | 24.07       |
| 22.8  | 22.65       |
| 14.2  | 14.07       |

### **XIII. NMR Spectra**

# Compound S1 (CDCl<sub>3</sub>, <sup>1</sup>H NMR: 400 MHz, <sup>13</sup>C{<sup>1</sup>H} NMR: 101 MHz)

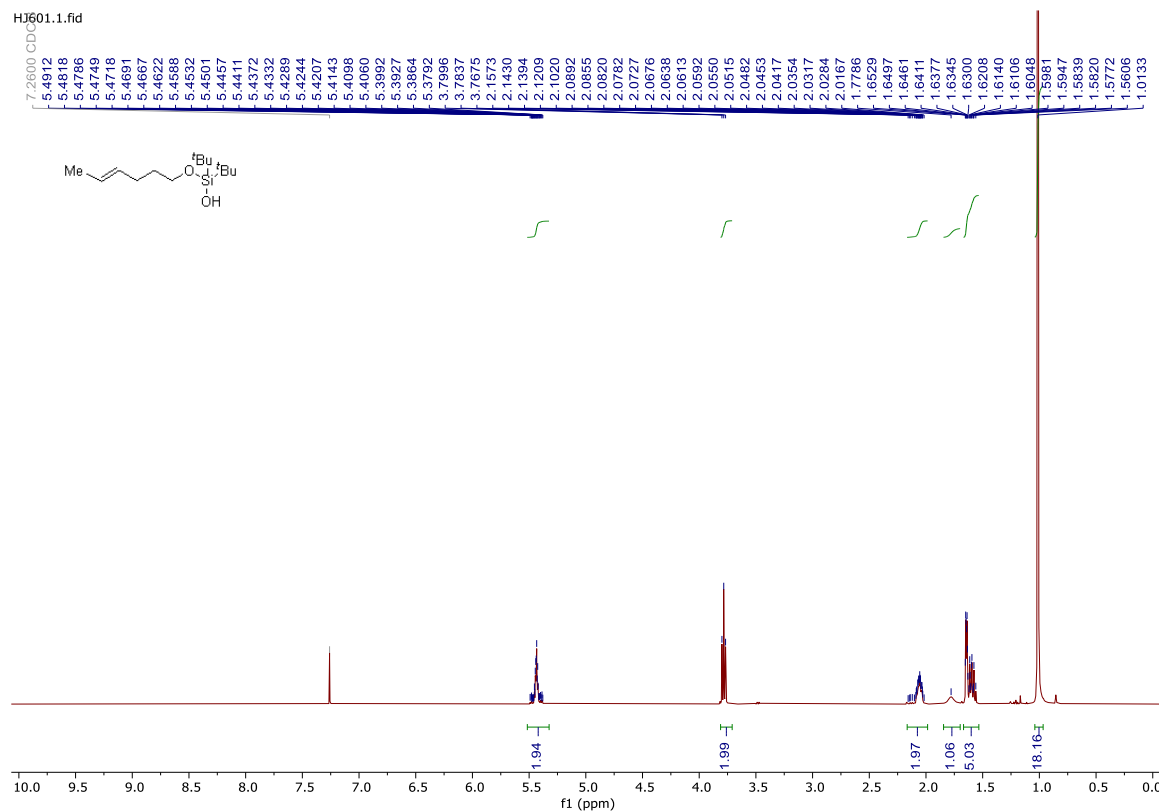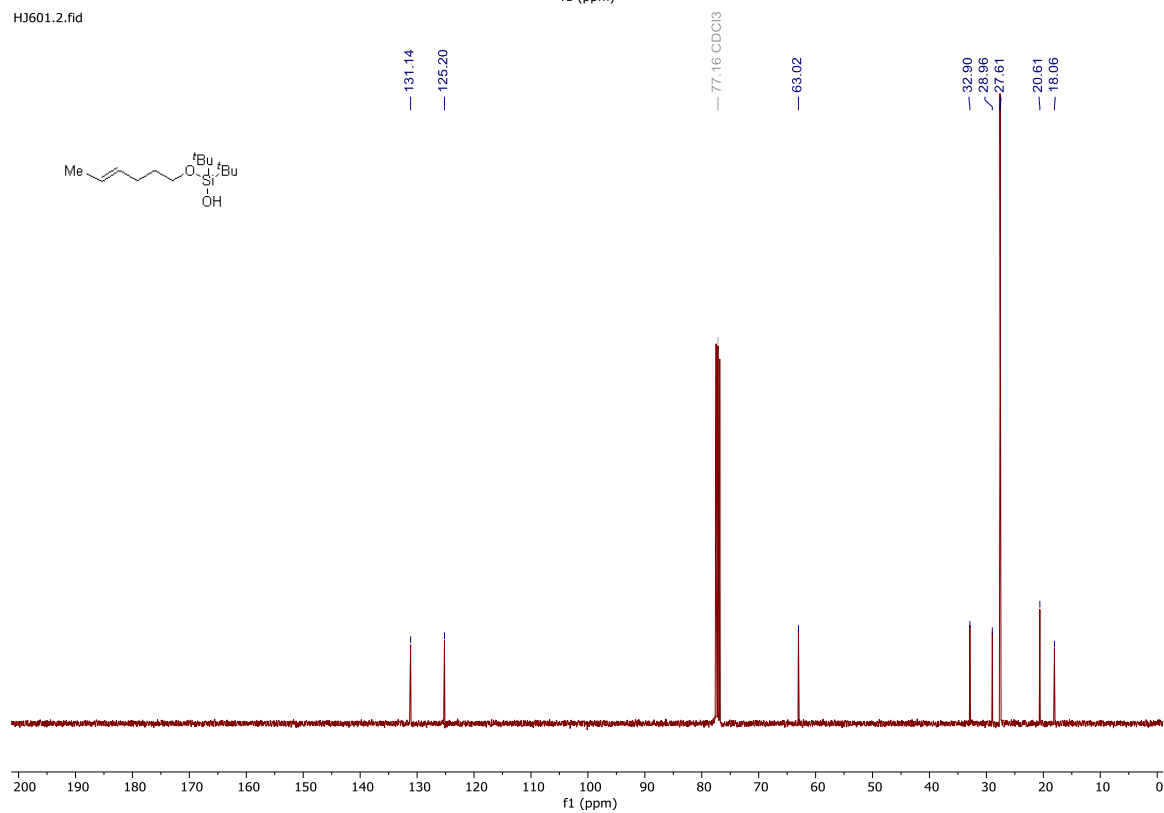

**Compound S3 (CDCl<sub>3</sub>, <sup>1</sup>H NMR: 400 MHz, <sup>13</sup>C{<sup>1</sup>H} NMR: 101 MHz)**

HJ360\_T.1.fid

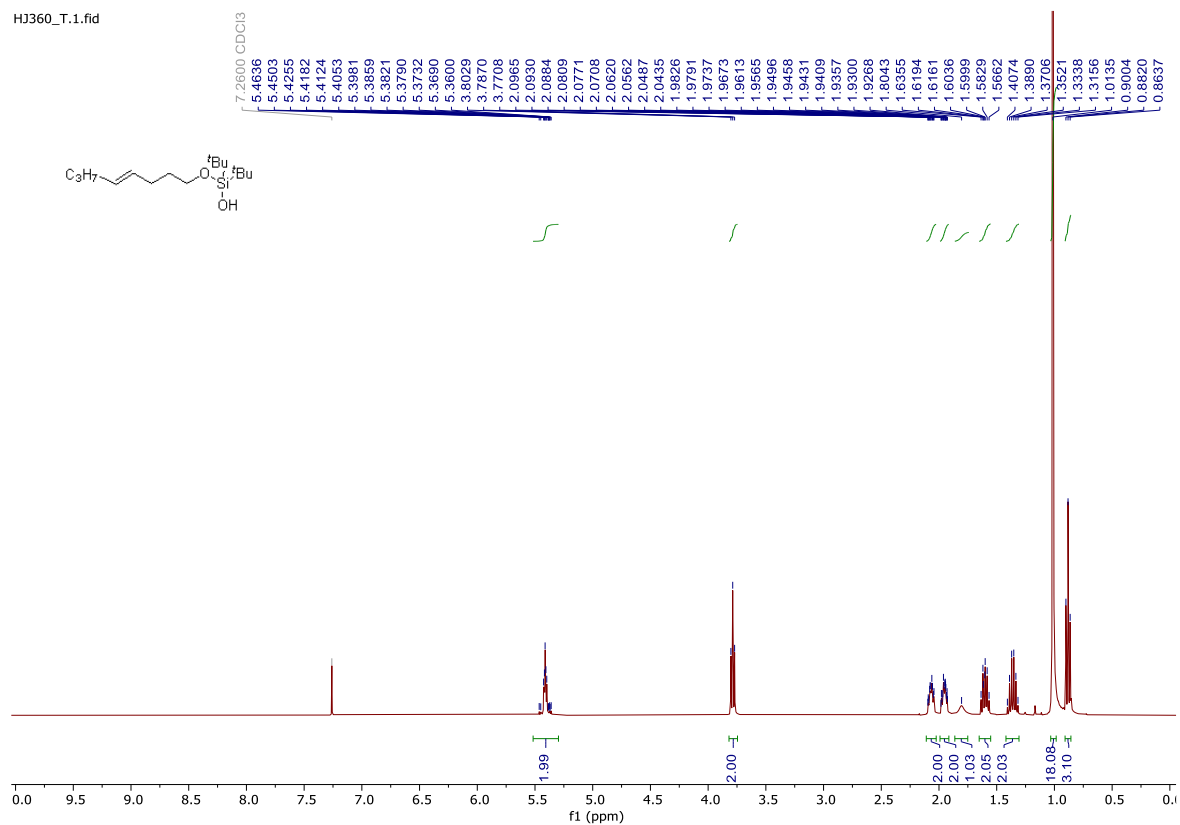

HJ360\_T.2.fid

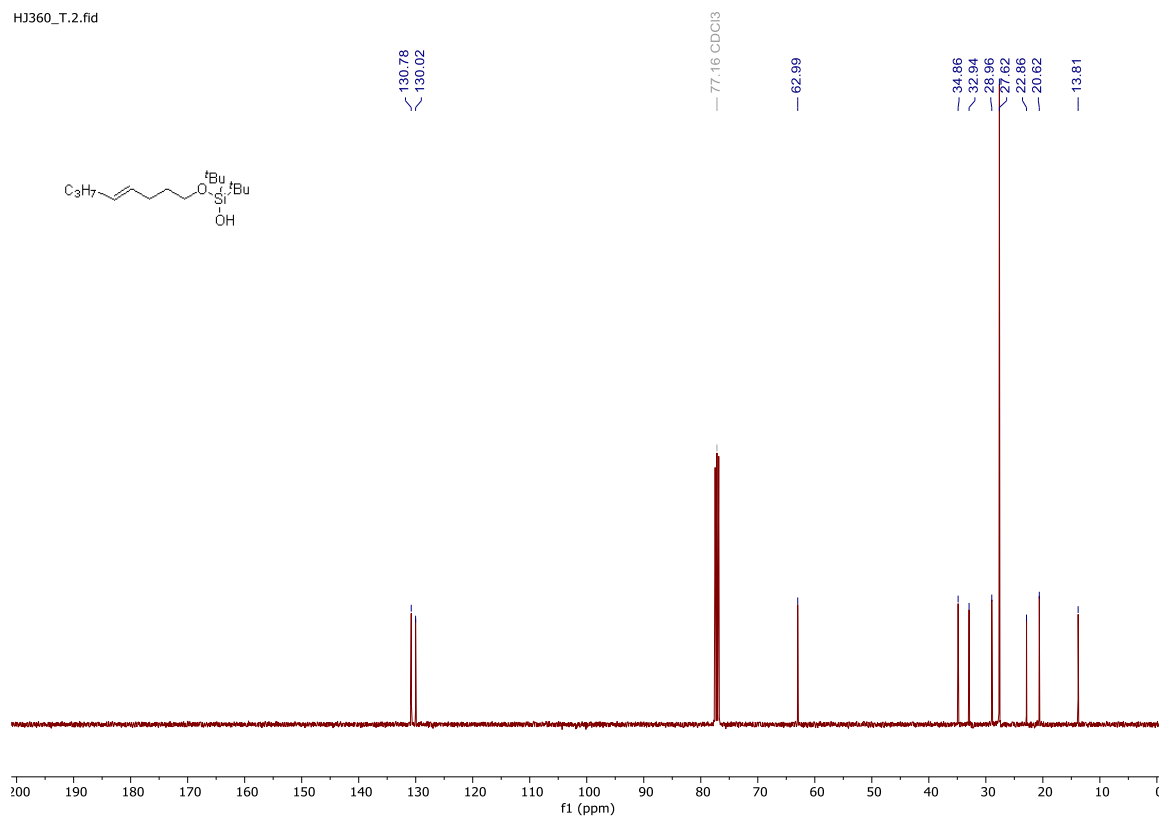

**Compound S5 (CDCl<sub>3</sub>, <sup>1</sup>H NMR: 400 MHz, <sup>13</sup>C{<sup>1</sup>H} NMR: 101 MHz)**

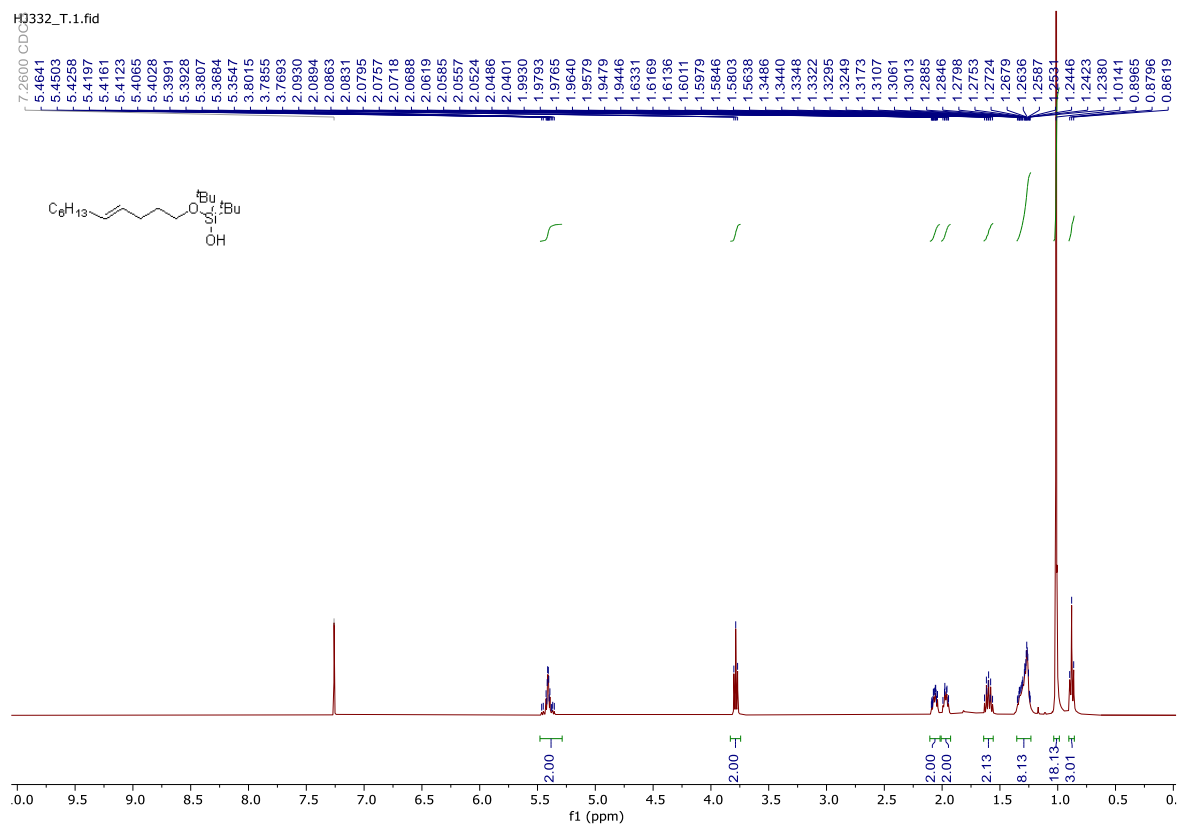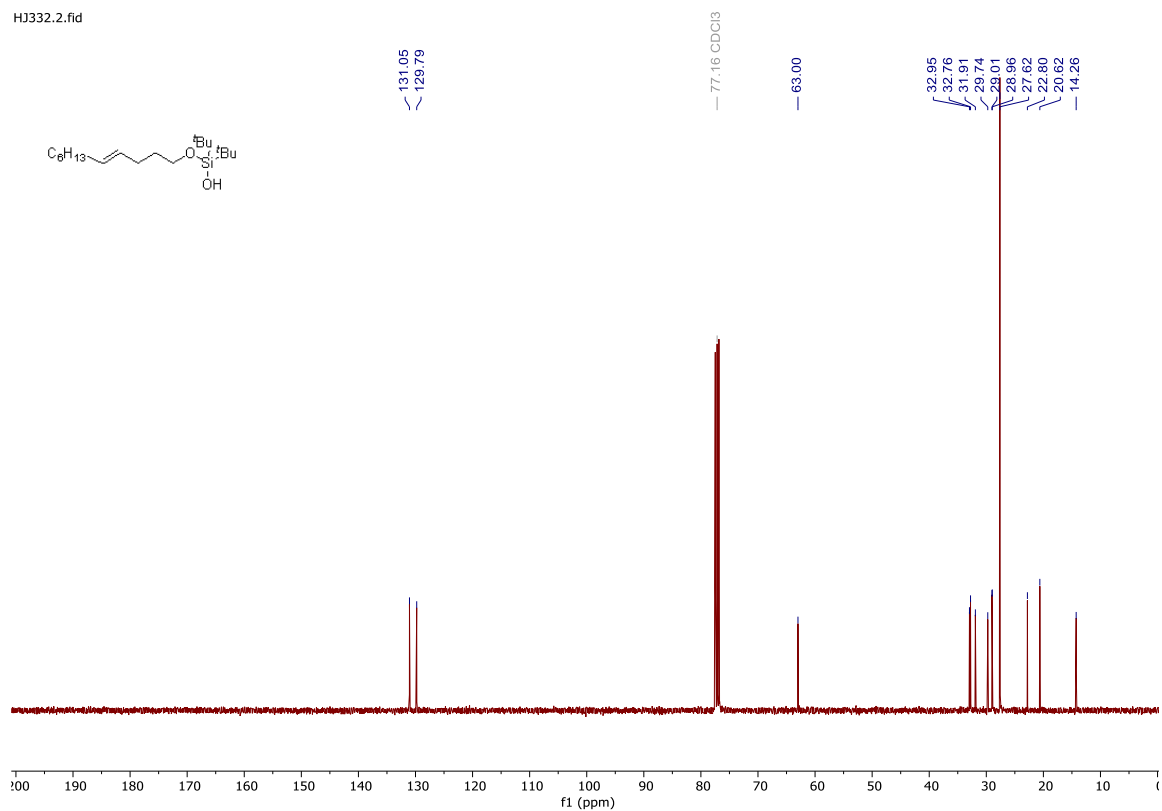

# Compound S7 (CDCl<sub>3</sub>, <sup>1</sup>H NMR: 400 MHz, <sup>13</sup>C{<sup>1</sup>H} NMR: 101 MHz)

HJ472\_T.1.fid

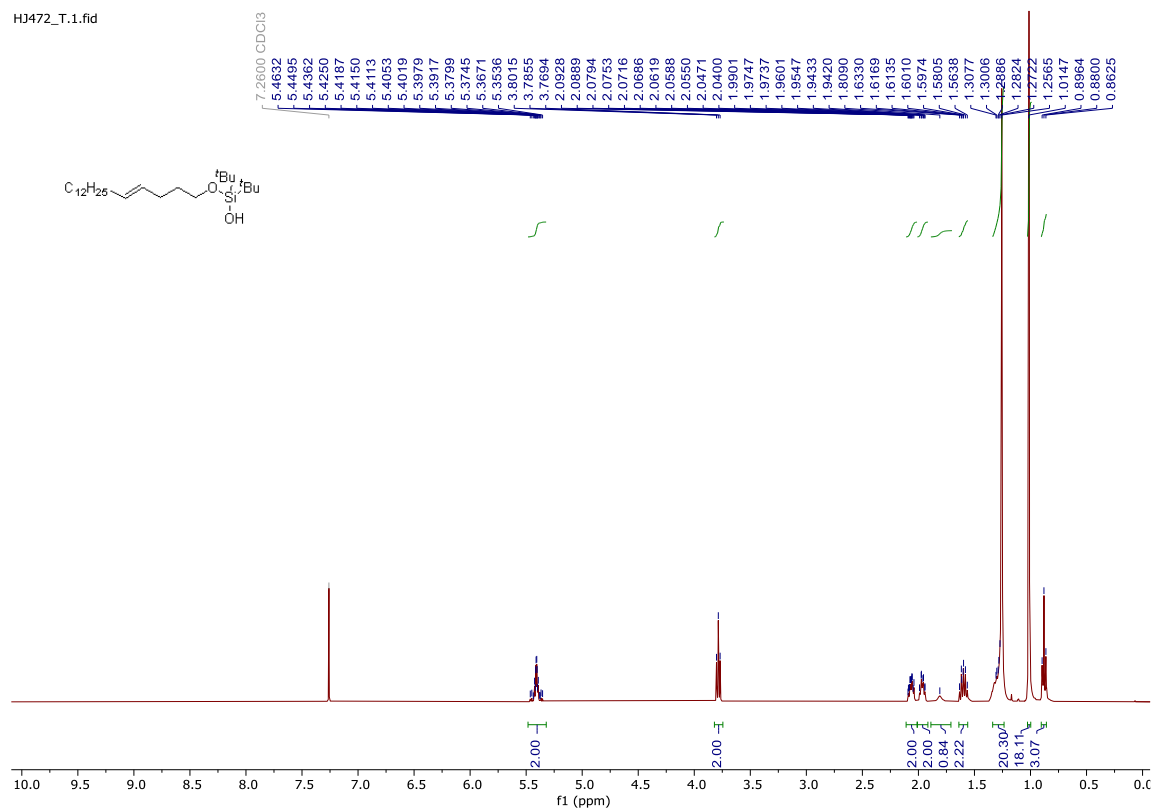

HJ472.2.fid

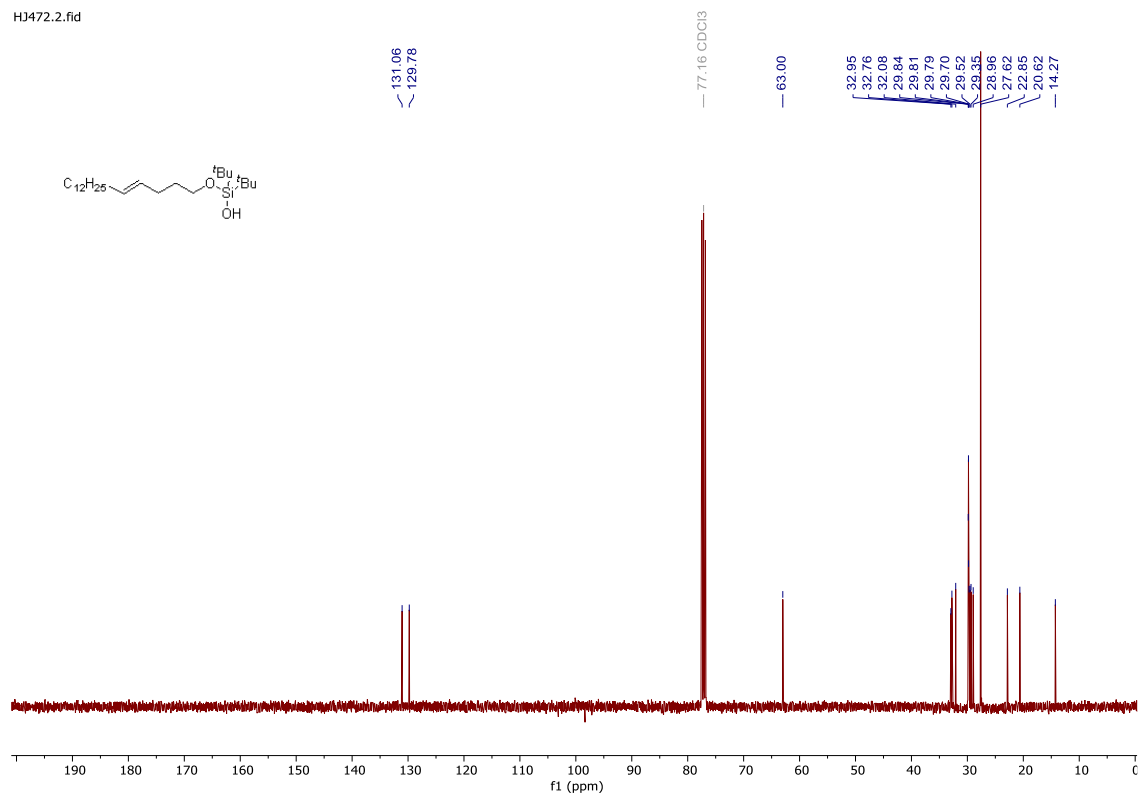



# Compound S9 (CDCl<sub>3</sub>, <sup>1</sup>H NMR: 400 MHz, <sup>13</sup>C{<sup>1</sup>H} NMR: 101 MHz)

HJ340.1.fid

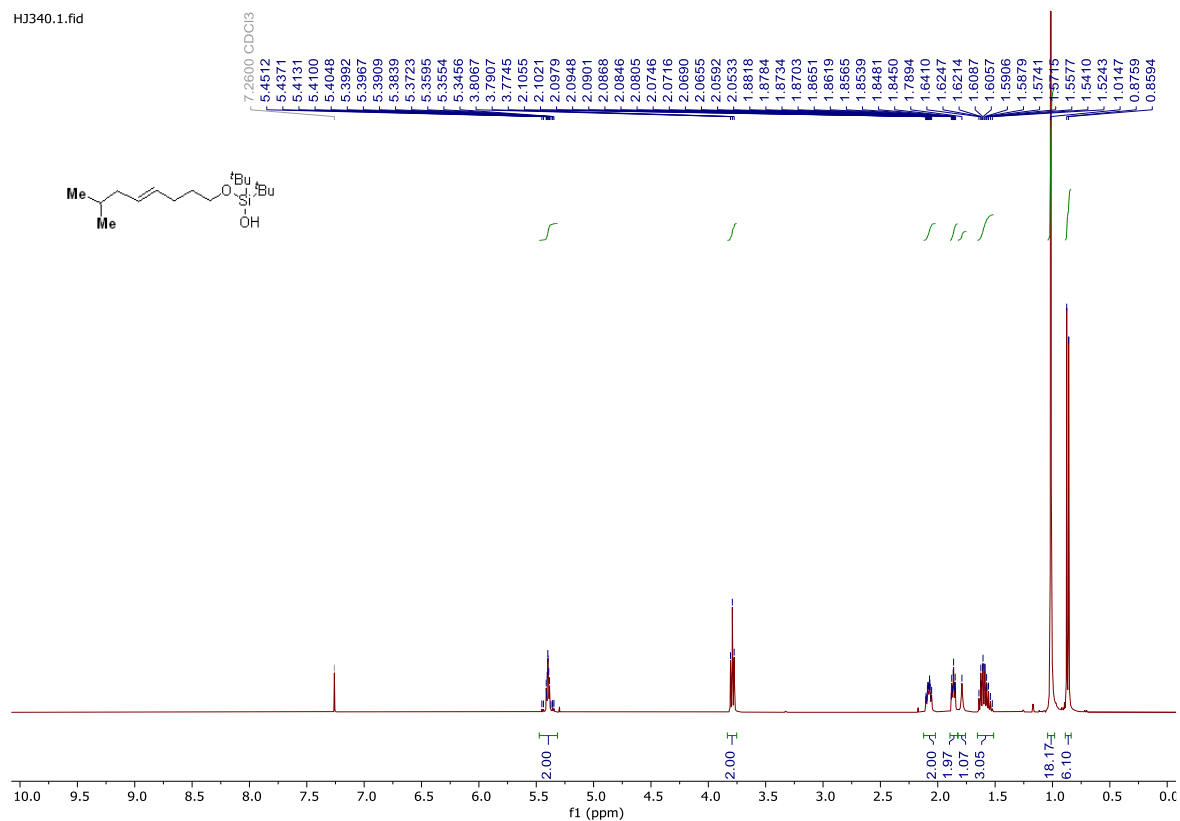

HJ340.2.fid

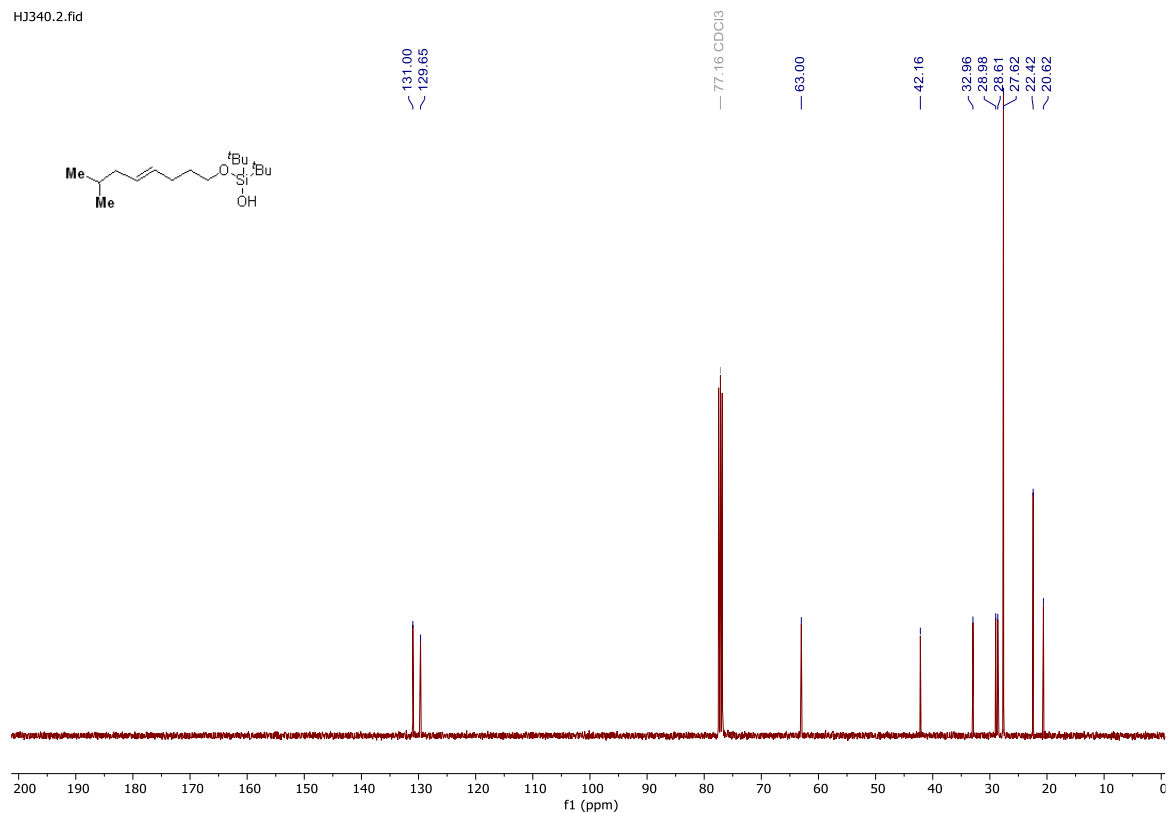

**Compound S11 (CDCl<sub>3</sub>, <sup>1</sup>H NMR: 400 MHz, <sup>13</sup>C{<sup>1</sup>H} NMR: 101 MHz)**

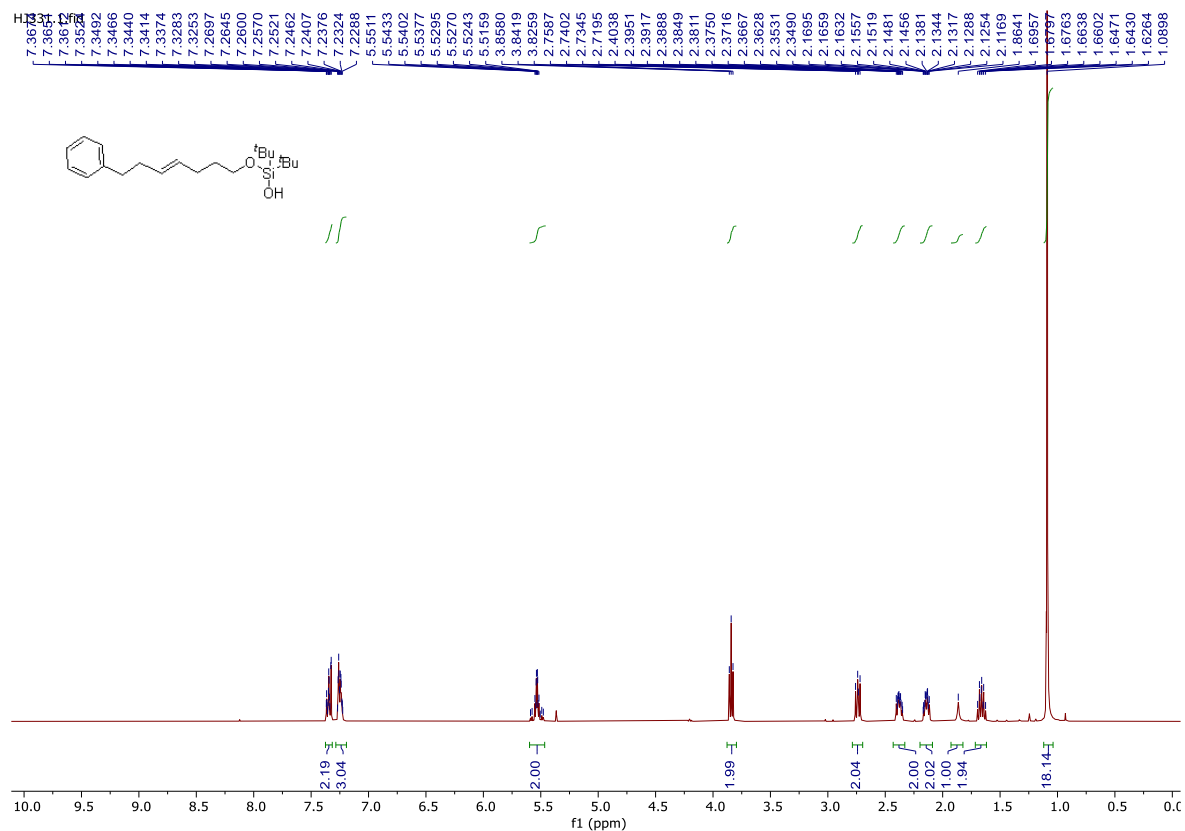

H3331.2.fid

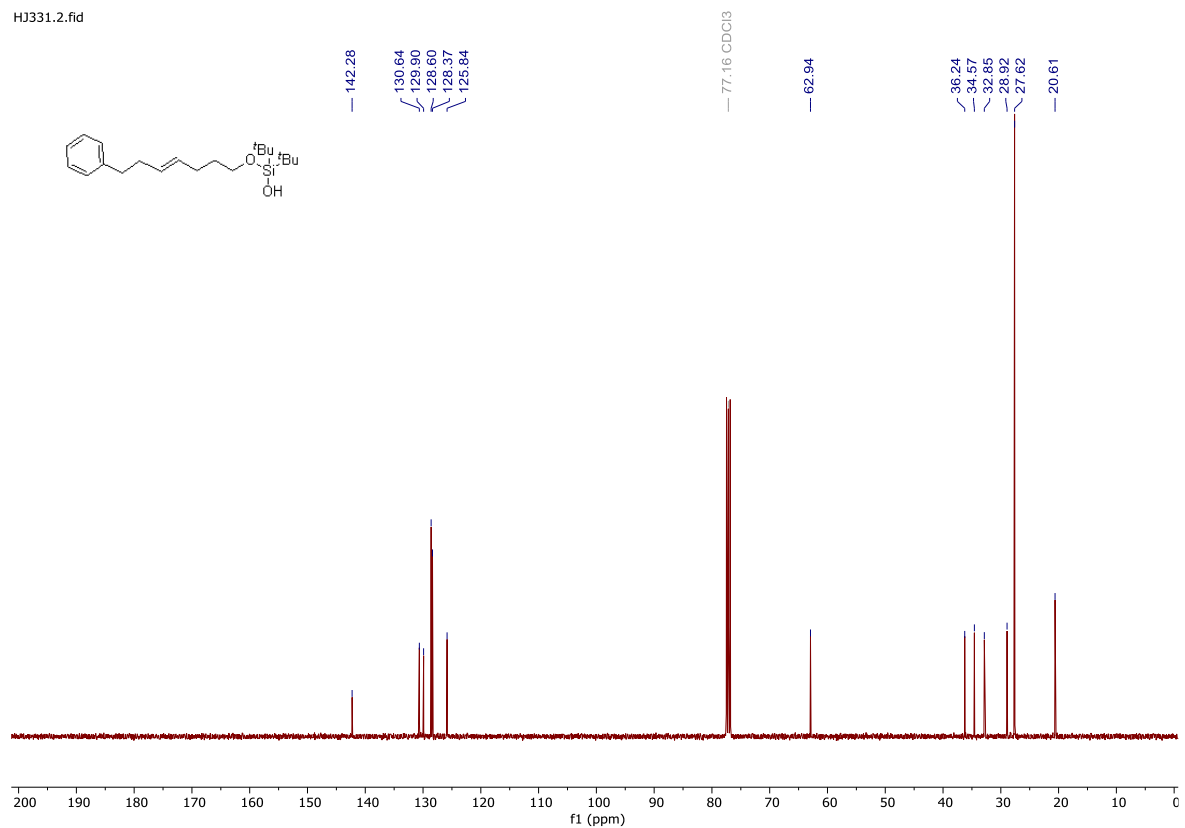

**Compound S13 (CDCl<sub>3</sub>, <sup>1</sup>H NMR: 400 MHz, <sup>13</sup>C{<sup>1</sup>H} NMR: 101 MHz)**

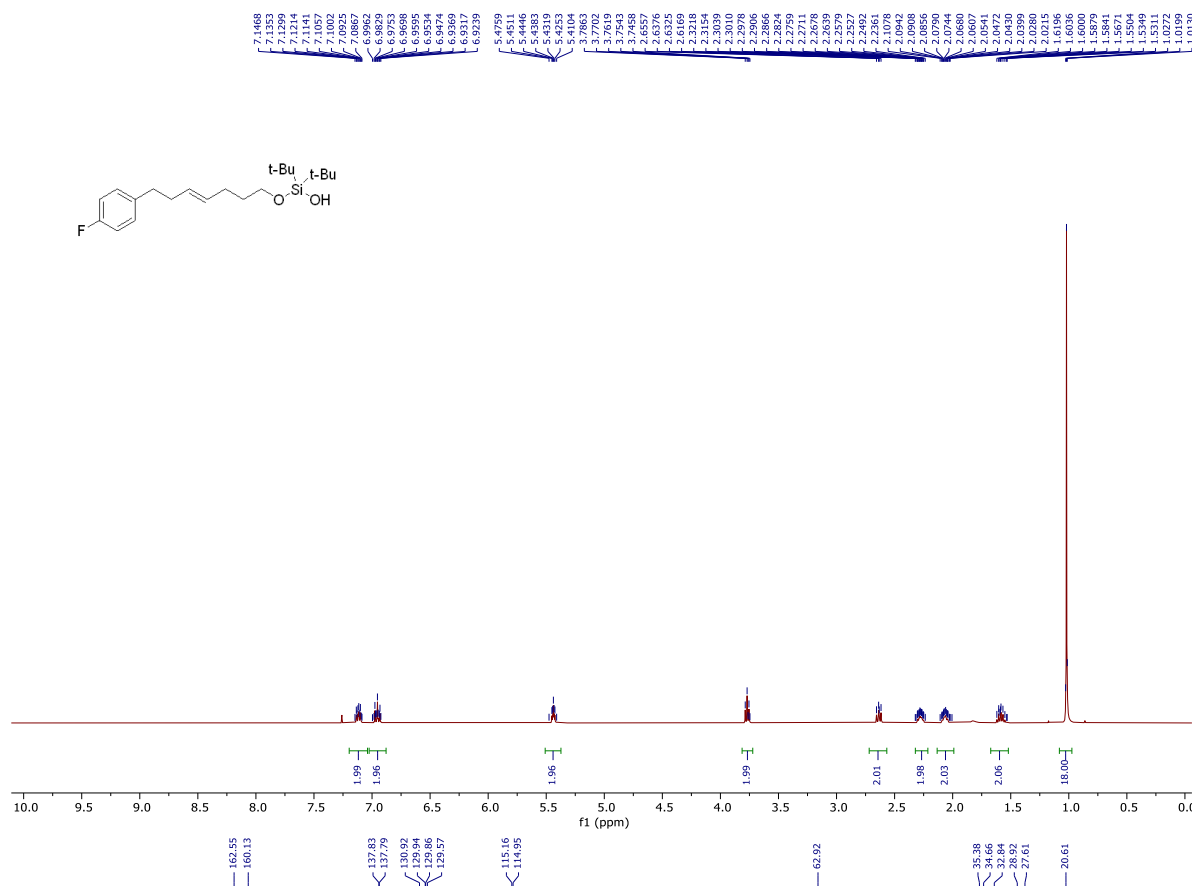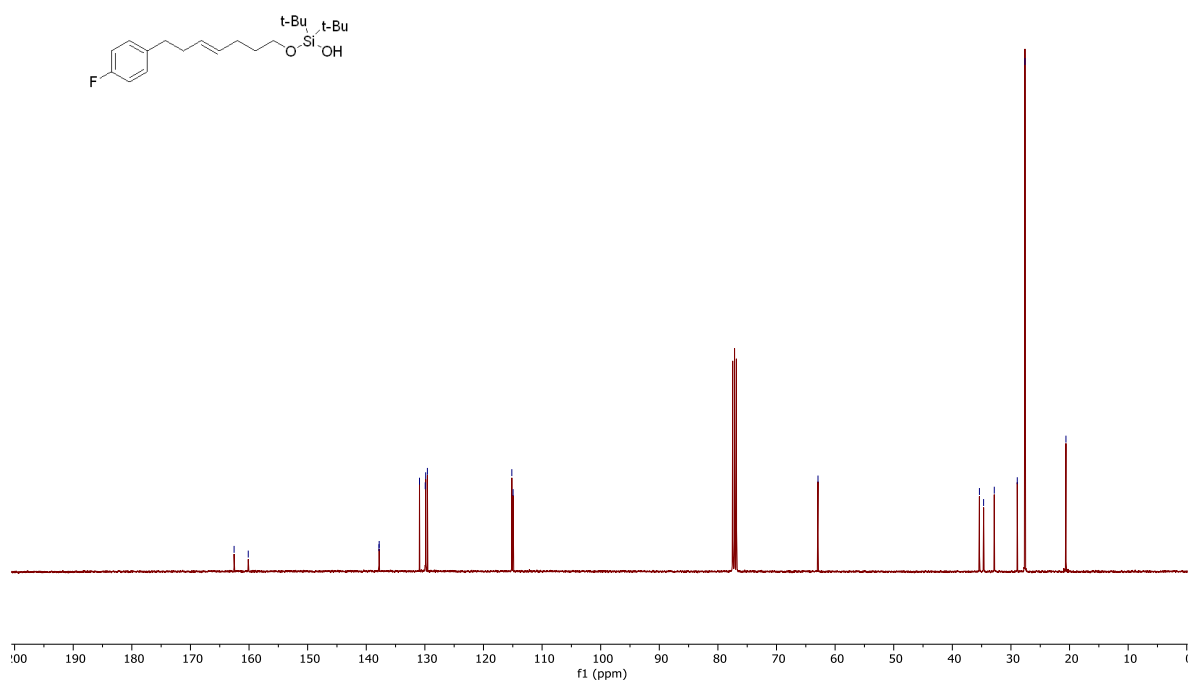

**Compound S15 (CDCl<sub>3</sub>, <sup>1</sup>H NMR: 400 MHz, <sup>13</sup>C{<sup>1</sup>H} NMR: 101 MHz)**

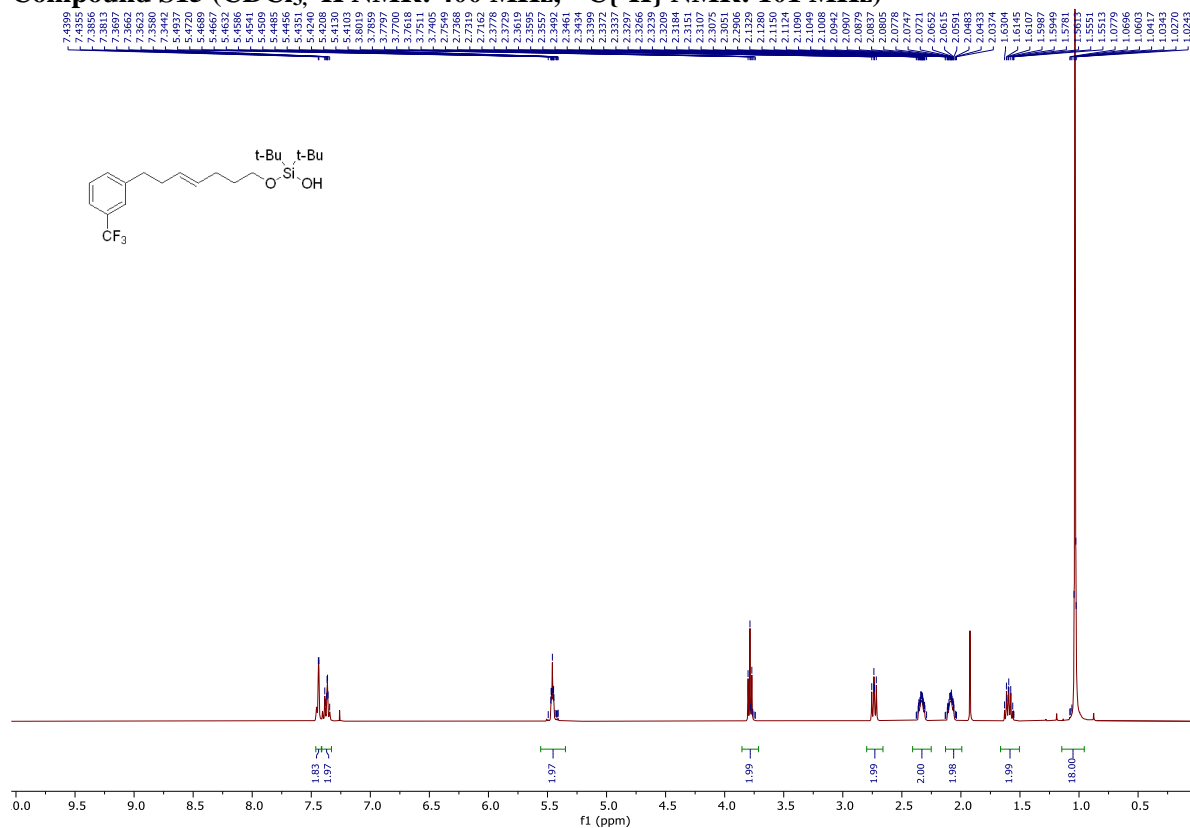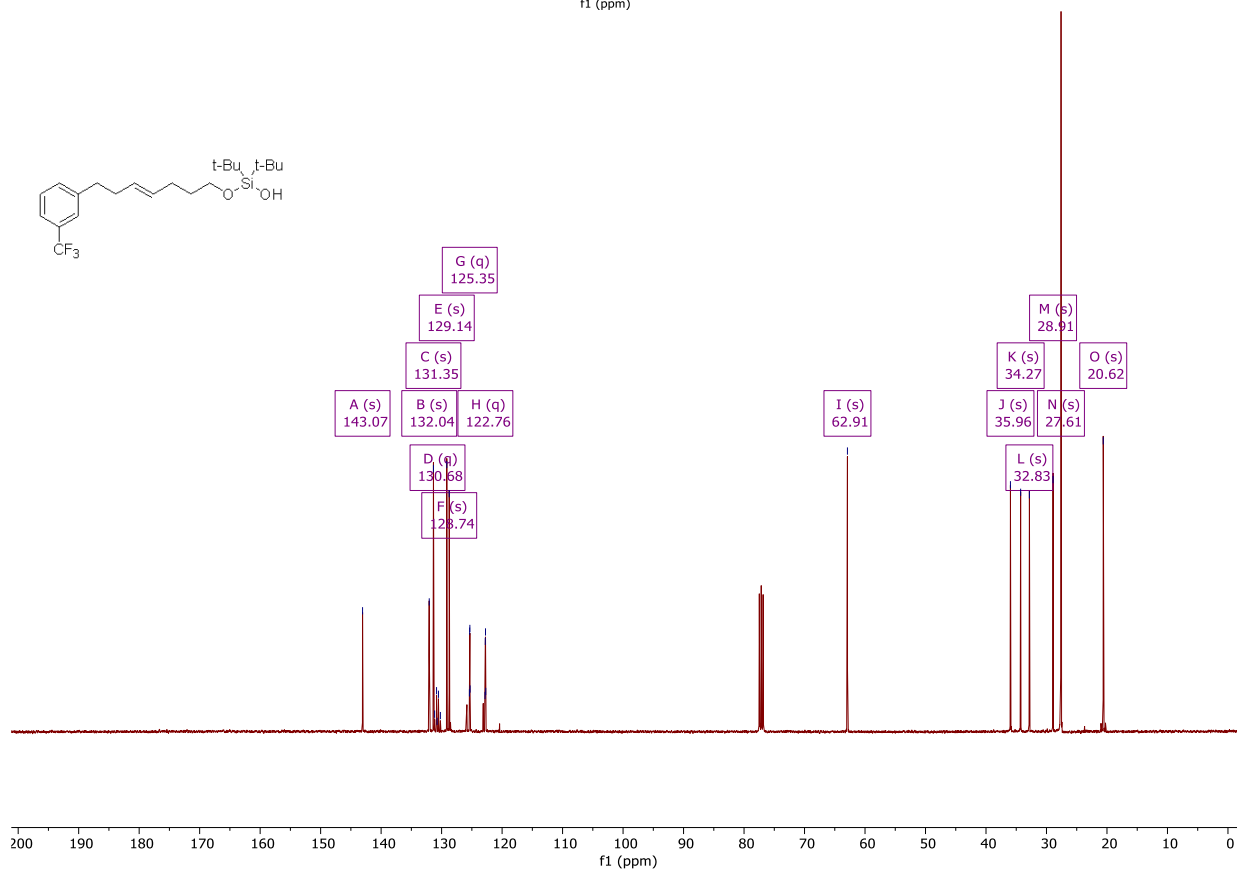

**Compound S17 (CDCl<sub>3</sub>, <sup>1</sup>H NMR: 400 MHz, <sup>13</sup>C{<sup>1</sup>H} NMR: 101 MHz)**

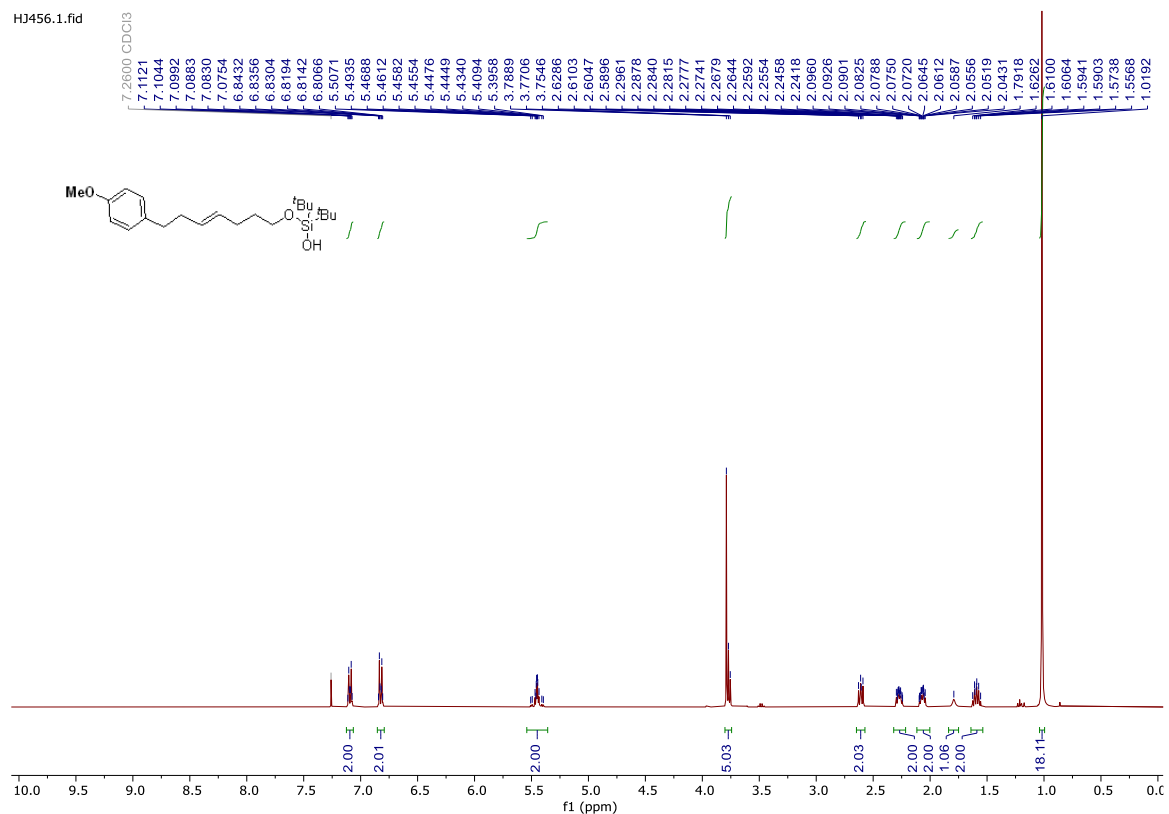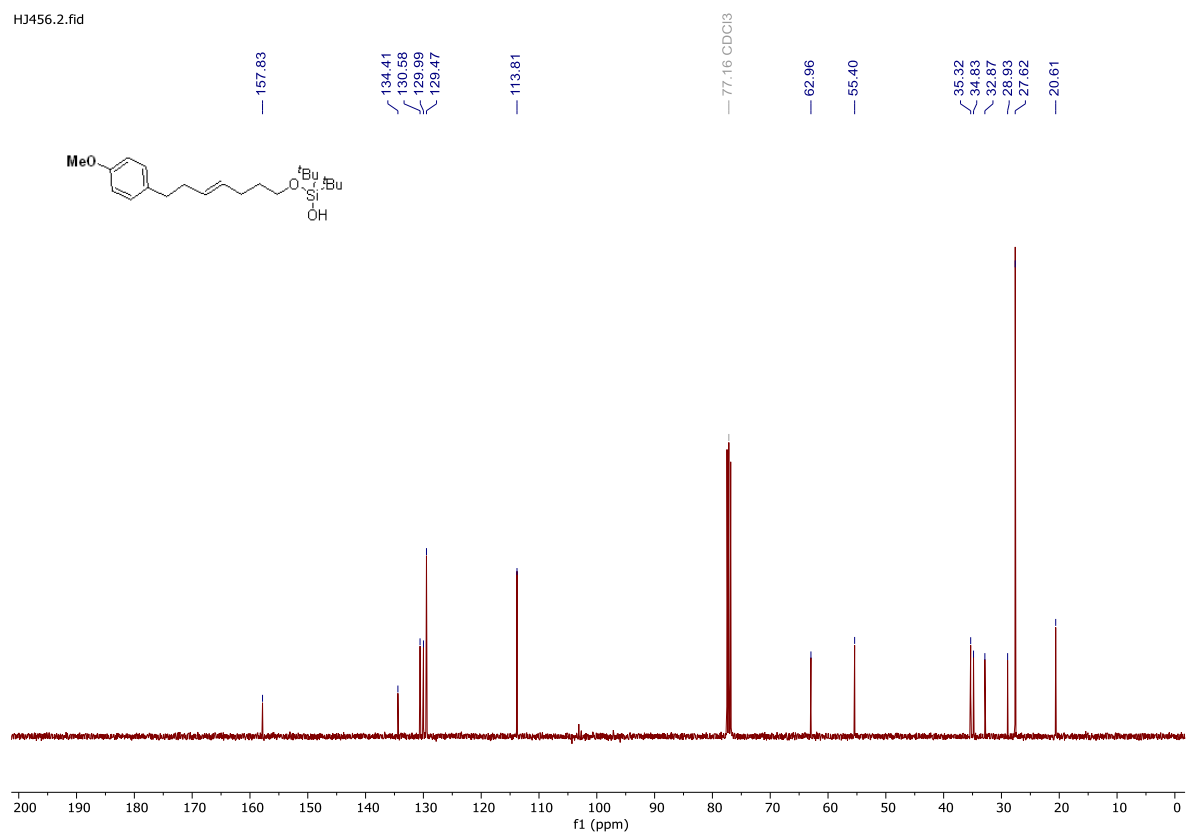

Compound S19 (CDCl<sub>3</sub>, <sup>1</sup>H NMR: 400 MHz, <sup>13</sup>C{<sup>1</sup>H} NMR: 101 MHz)

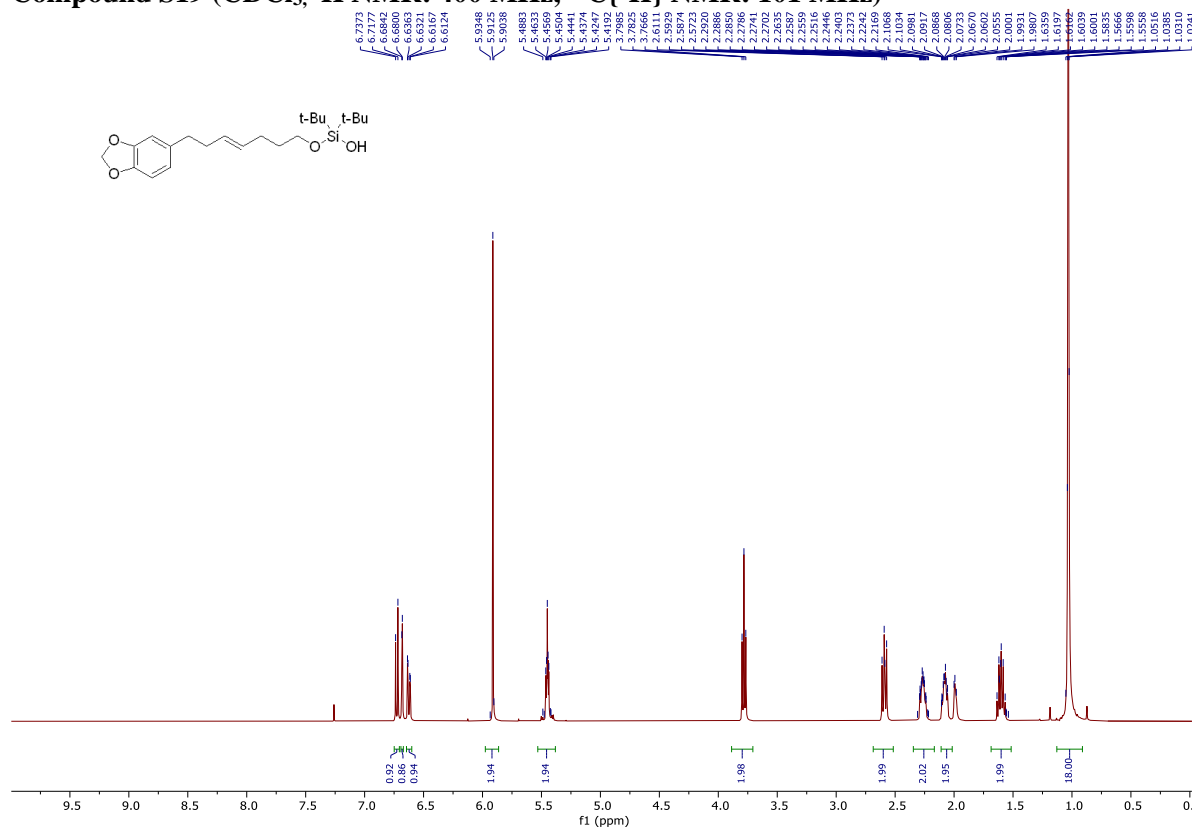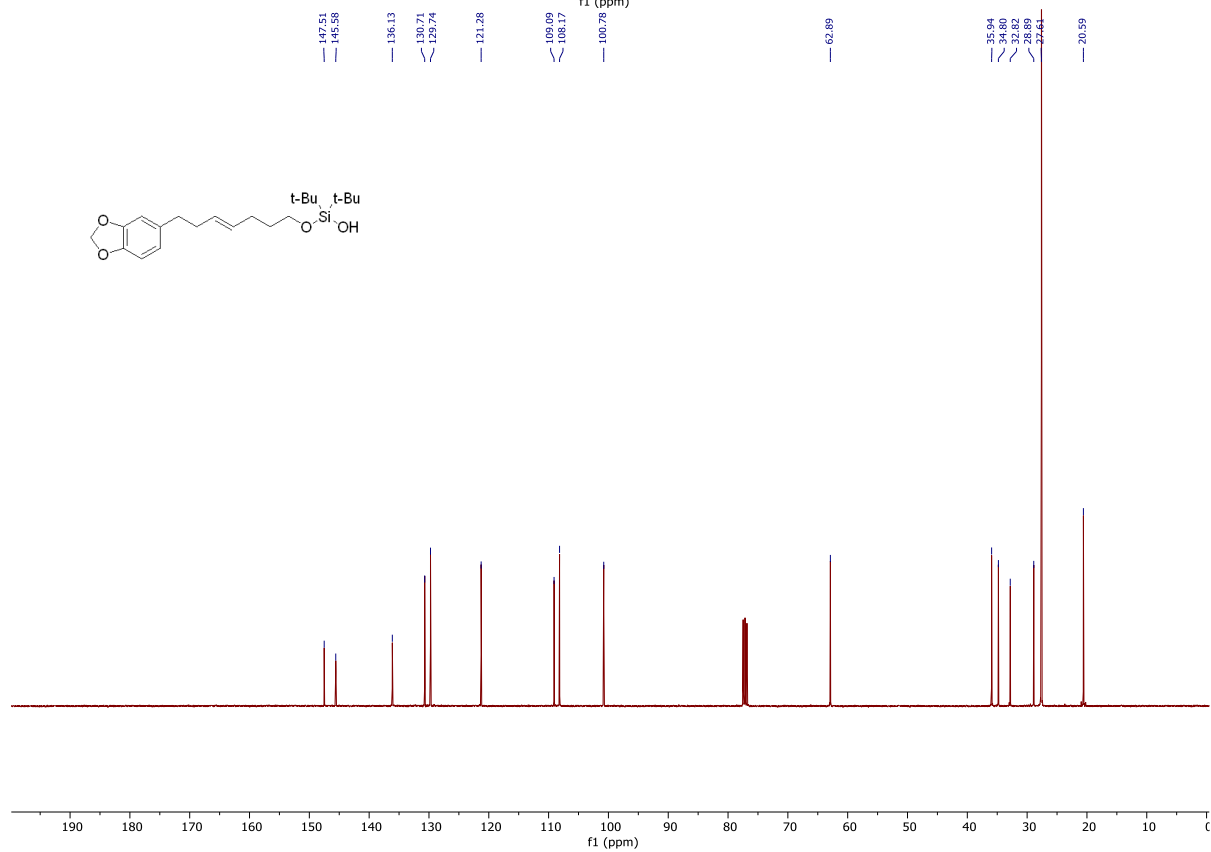

Compound S21 (CDCl<sub>3</sub>, <sup>1</sup>H NMR: 400 MHz, <sup>13</sup>C{<sup>1</sup>H} NMR: 101 MHz)

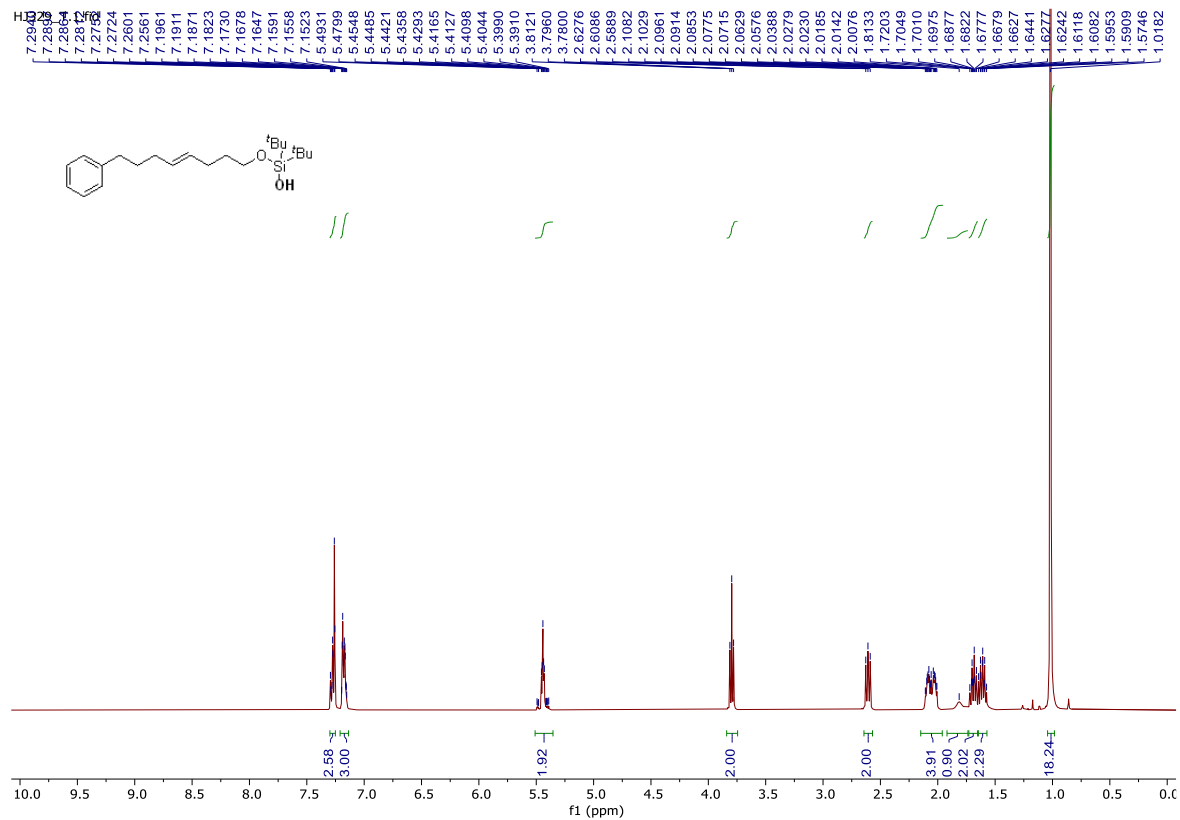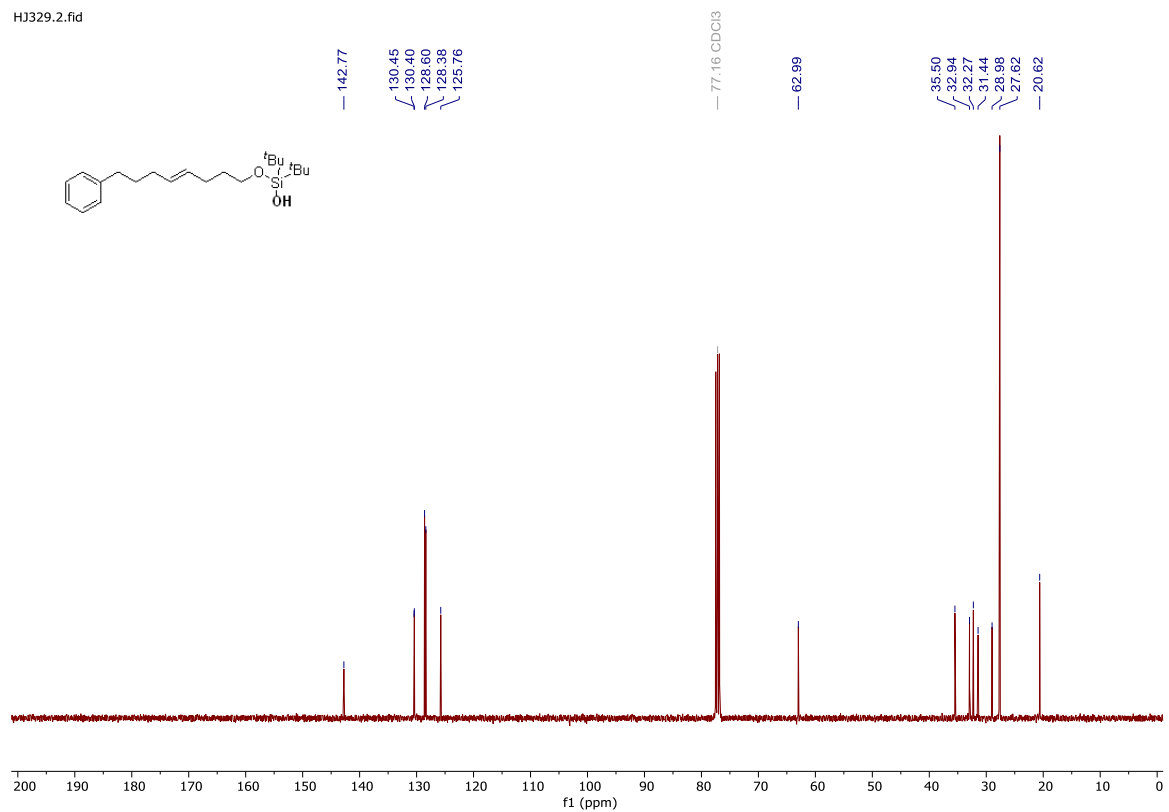

Compound S23 (CDCl<sub>3</sub>, <sup>1</sup>H NMR: 400 MHz, <sup>13</sup>C{<sup>1</sup>H} NMR: 101 MHz)

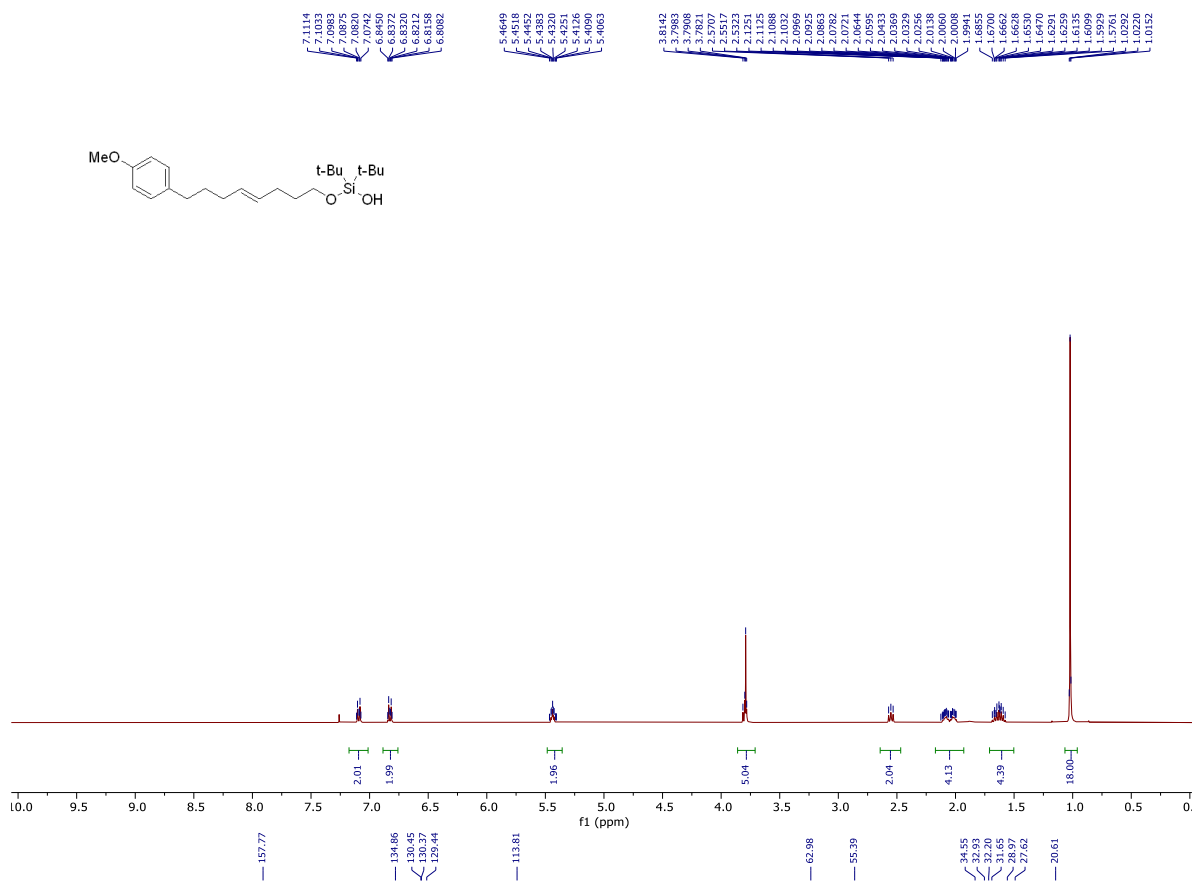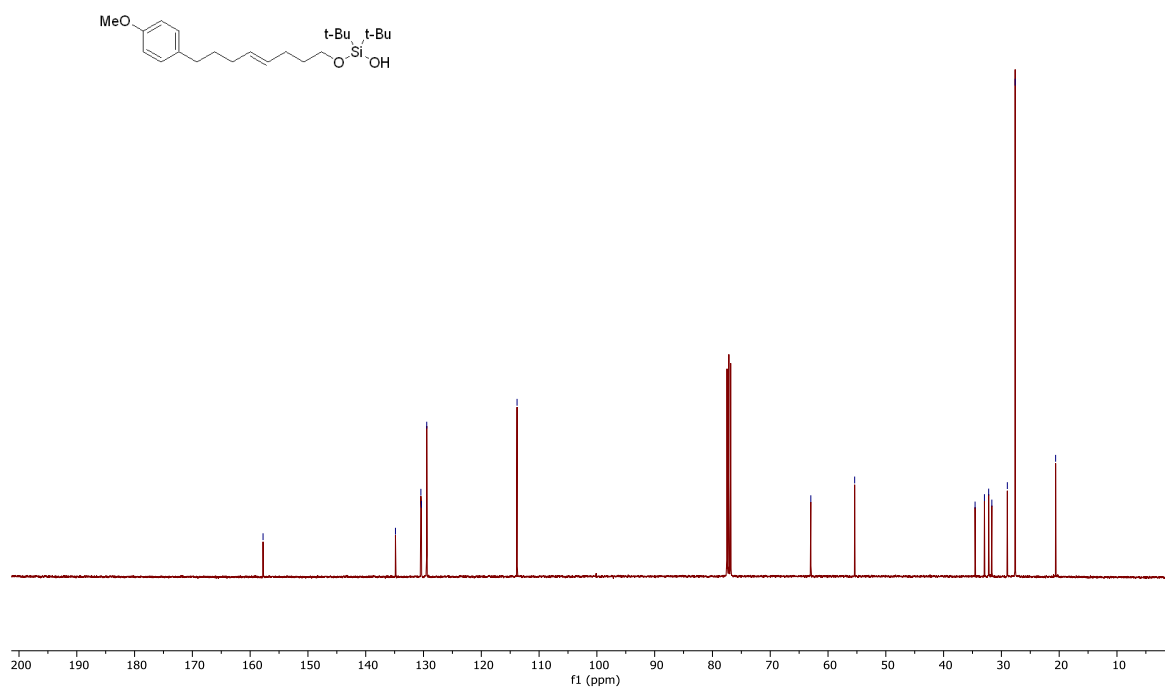



# Compound S25 (CDCl<sub>3</sub>, <sup>1</sup>H NMR: 400 MHz, <sup>13</sup>C{<sup>1</sup>H} NMR: 101 MHz)

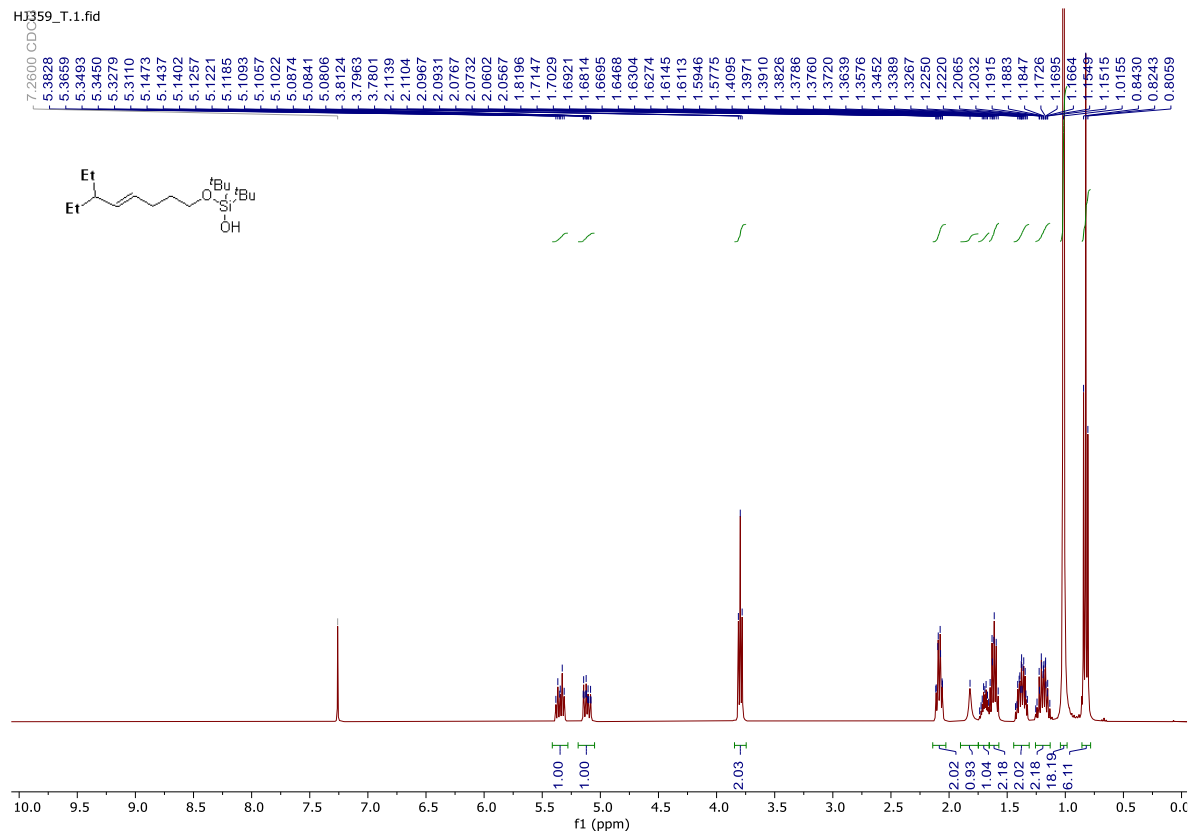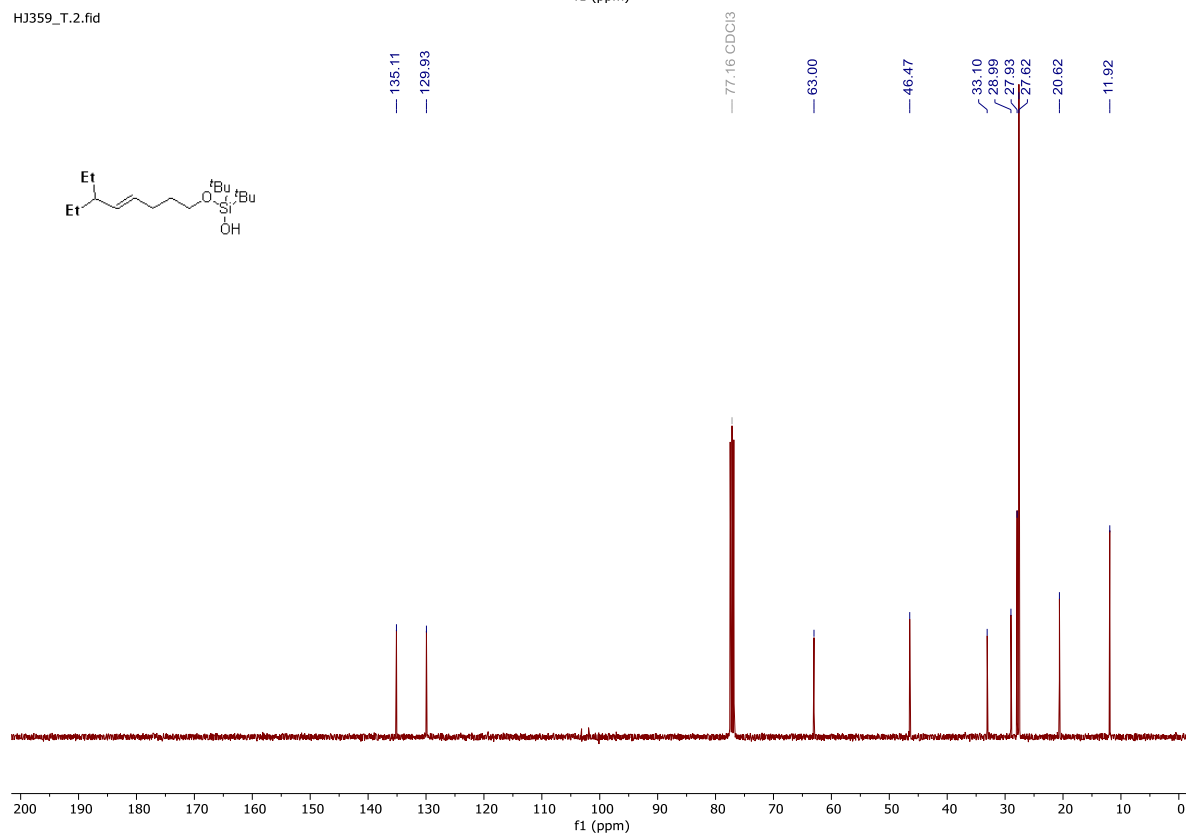

**Compound S27 (CDCl<sub>3</sub>, <sup>1</sup>H NMR: 400 MHz, <sup>13</sup>C{<sup>1</sup>H} NMR: 101 MHz)**

HJ355\_T.1.fid

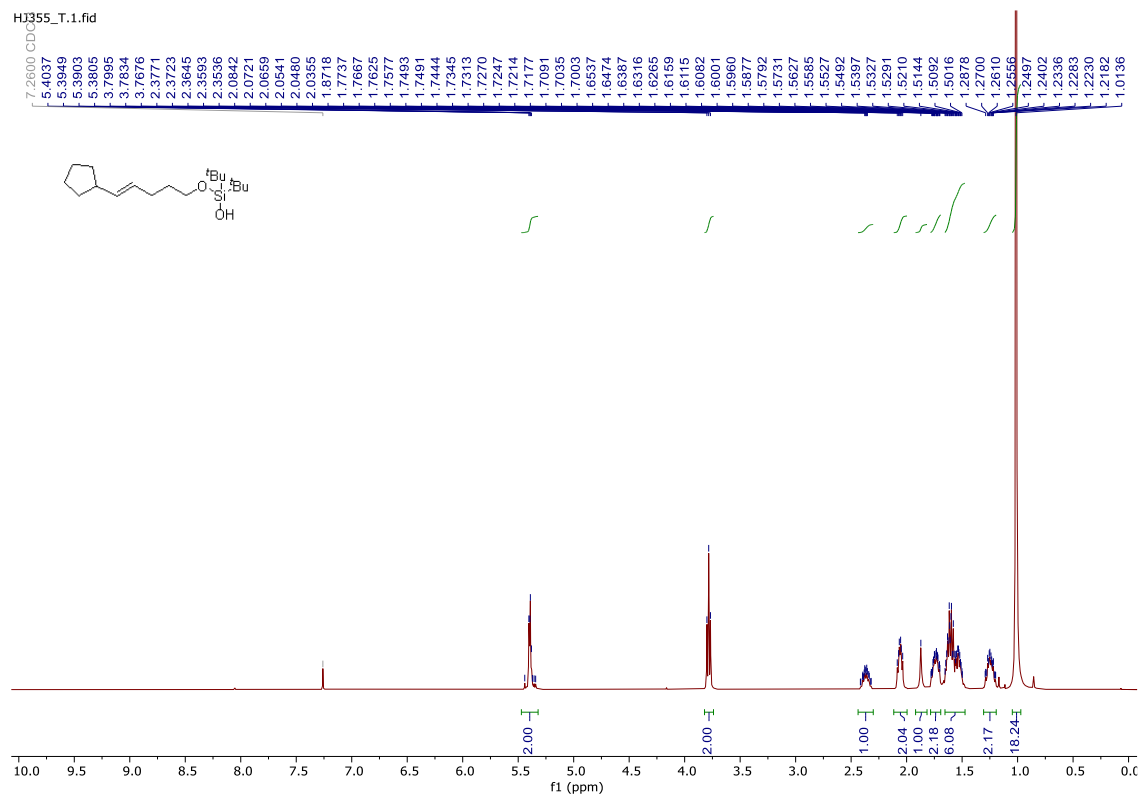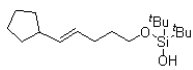

HJ355\_T.2.fid

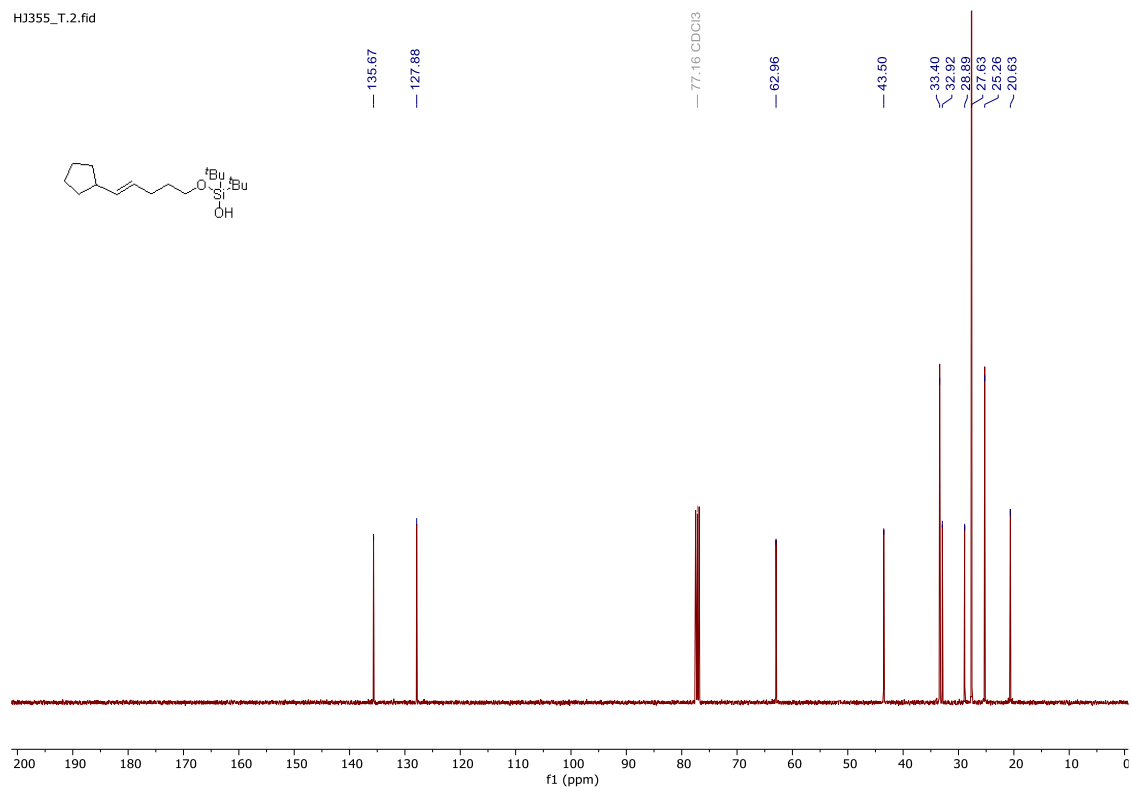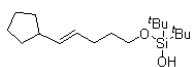

**Compound S29 (CDCl<sub>3</sub>, <sup>1</sup>H NMR: 400 MHz, <sup>13</sup>C{<sup>1</sup>H} NMR: 101 MHz)**

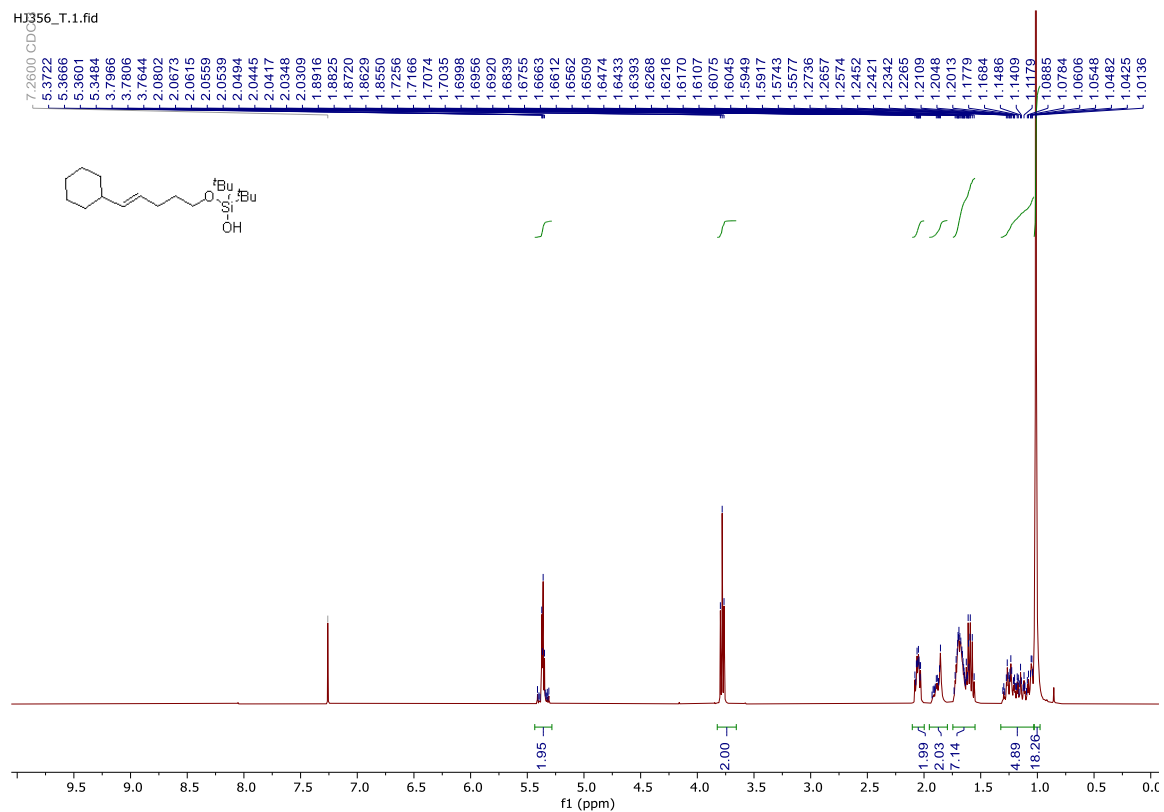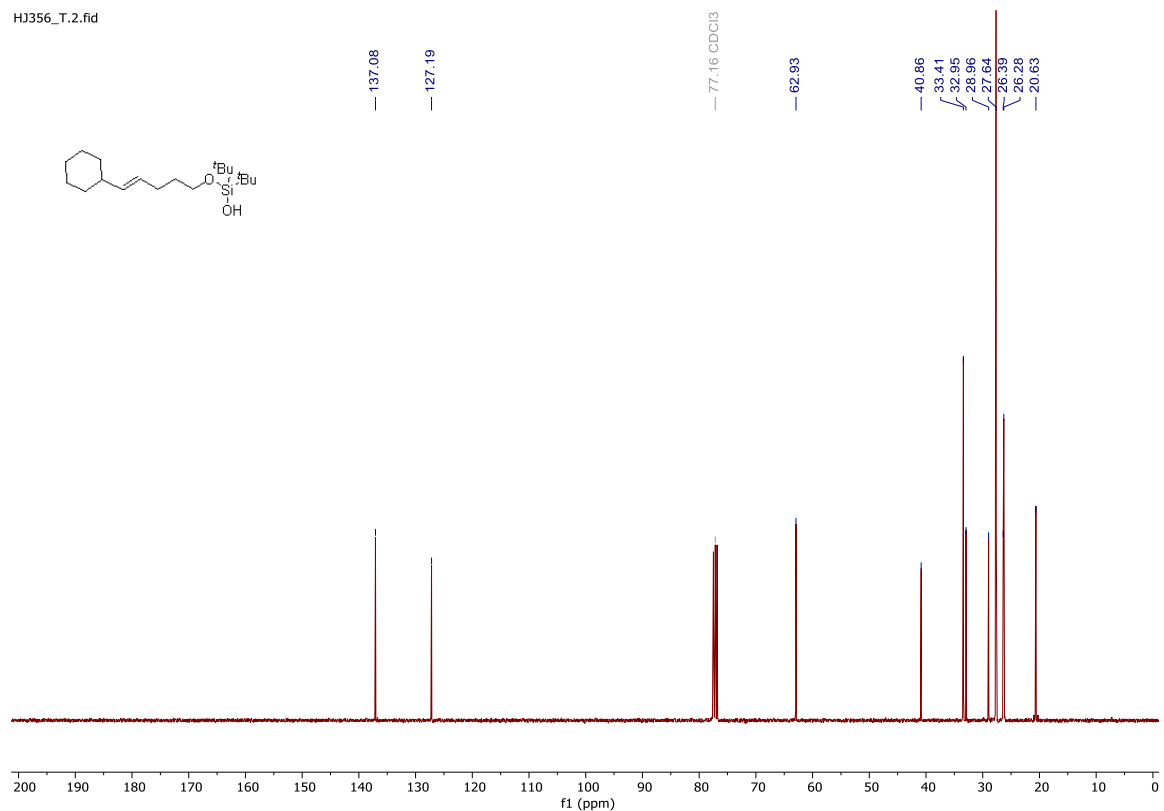

Compound S31 (CDCl<sub>3</sub>, <sup>1</sup>H NMR: 400 MHz, <sup>13</sup>C{<sup>1</sup>H} NMR: 101 MHz)

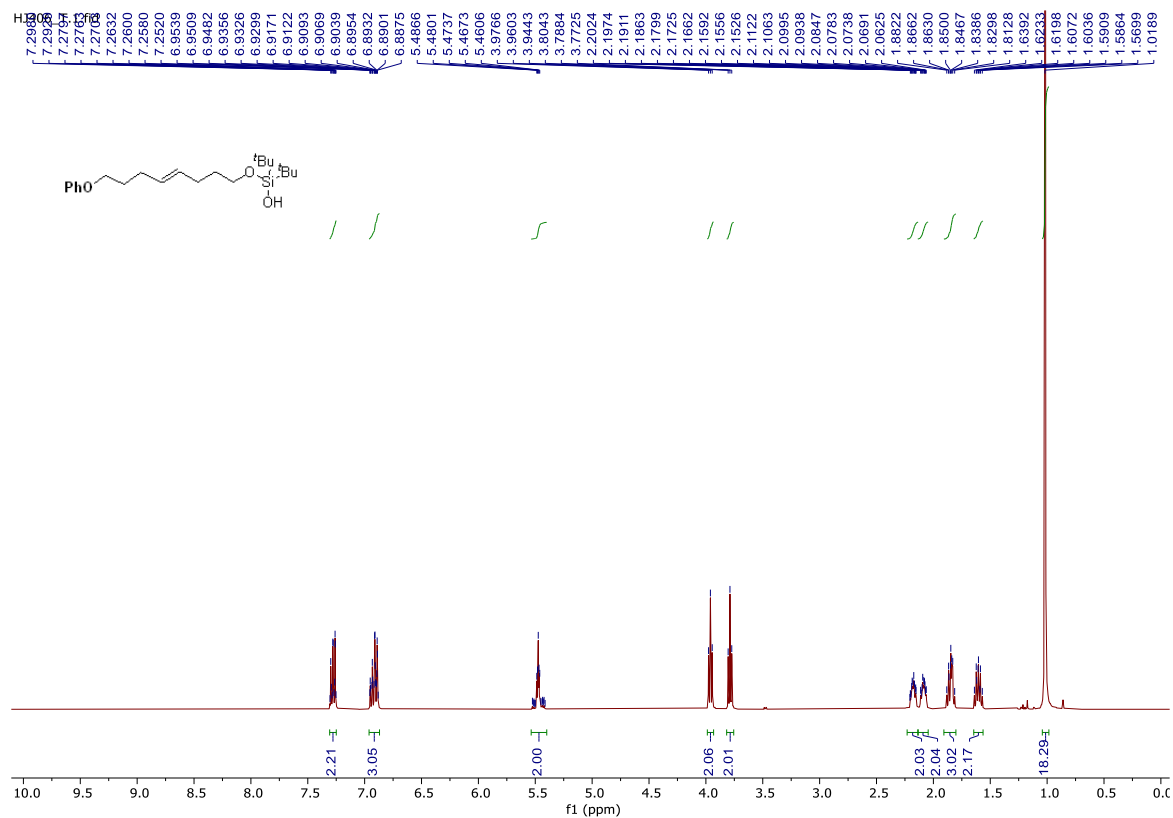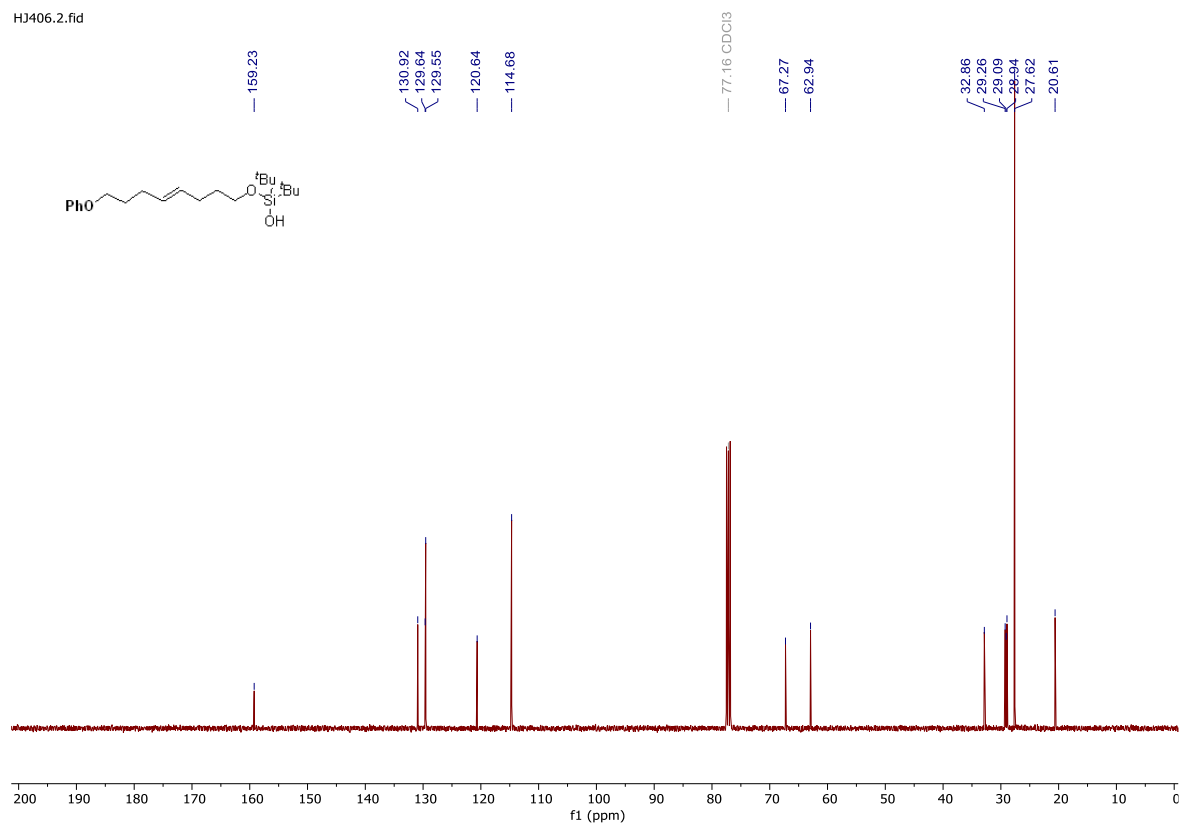

Compound S33 (CDCl<sub>3</sub>, <sup>1</sup>H NMR: 400 MHz, <sup>13</sup>C{<sup>1</sup>H} NMR: 101 MHz)

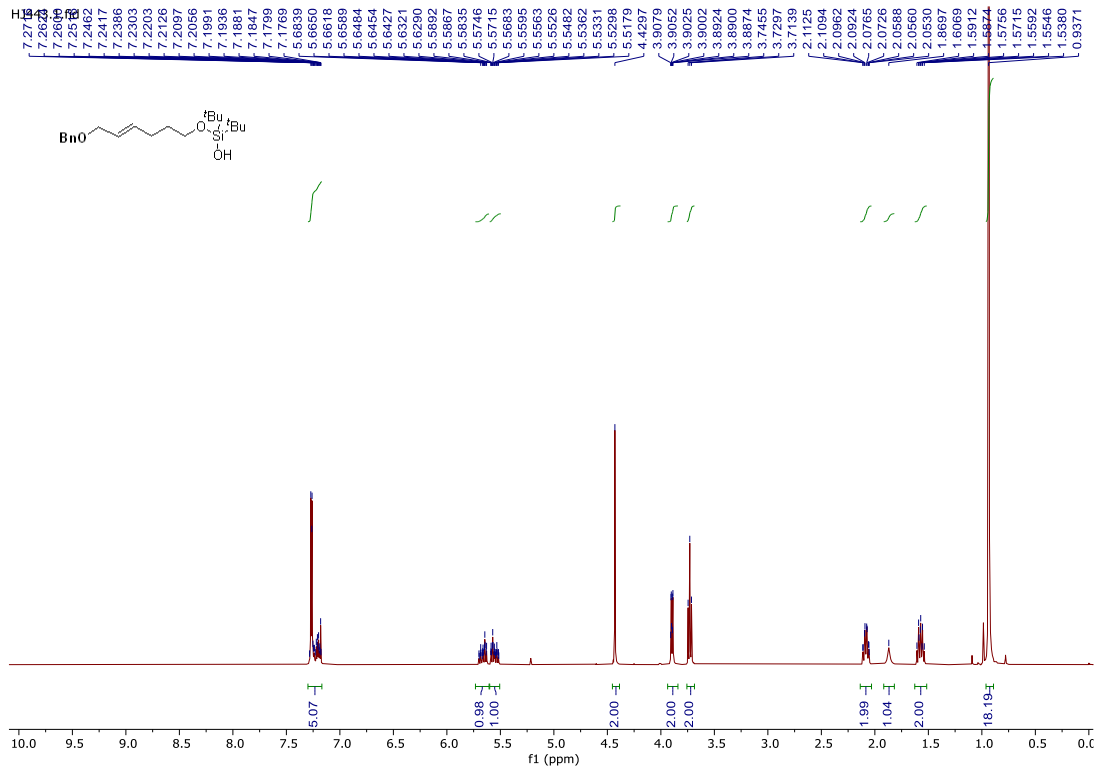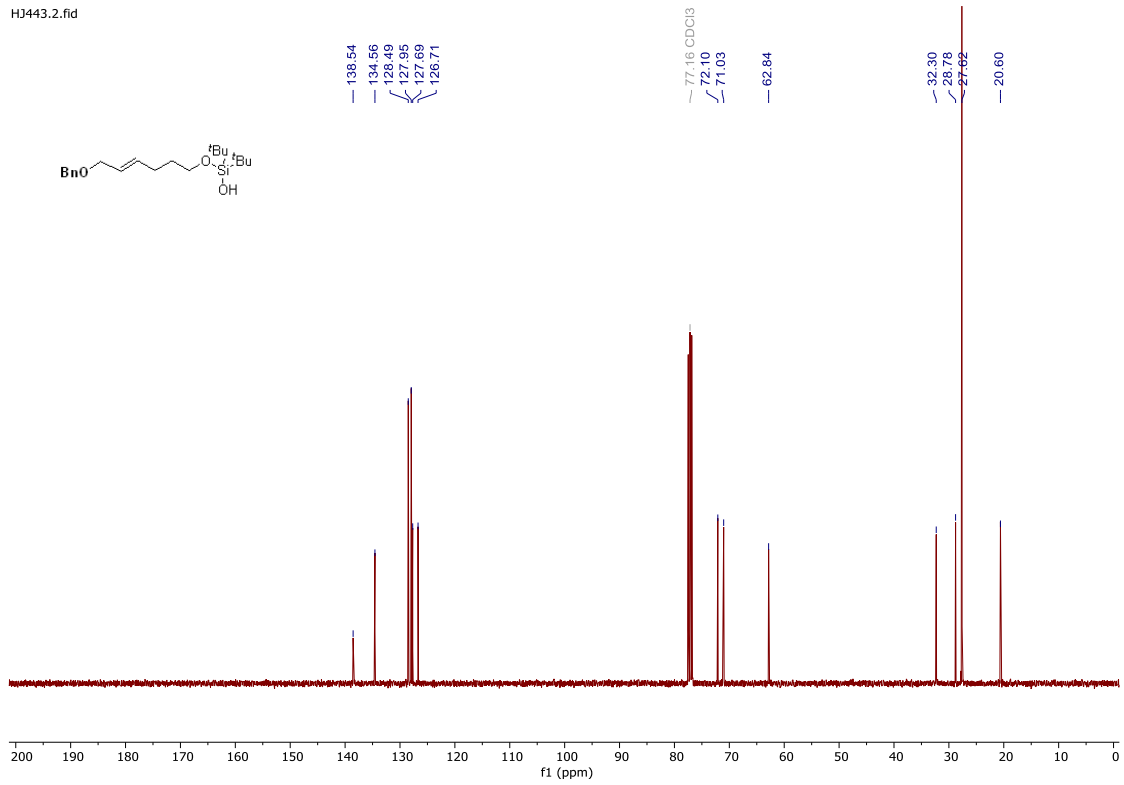

**Compound S35 (CDCl<sub>3</sub>, <sup>1</sup>H NMR: 400 MHz, <sup>13</sup>C{<sup>1</sup>H} NMR: 101 MHz)**

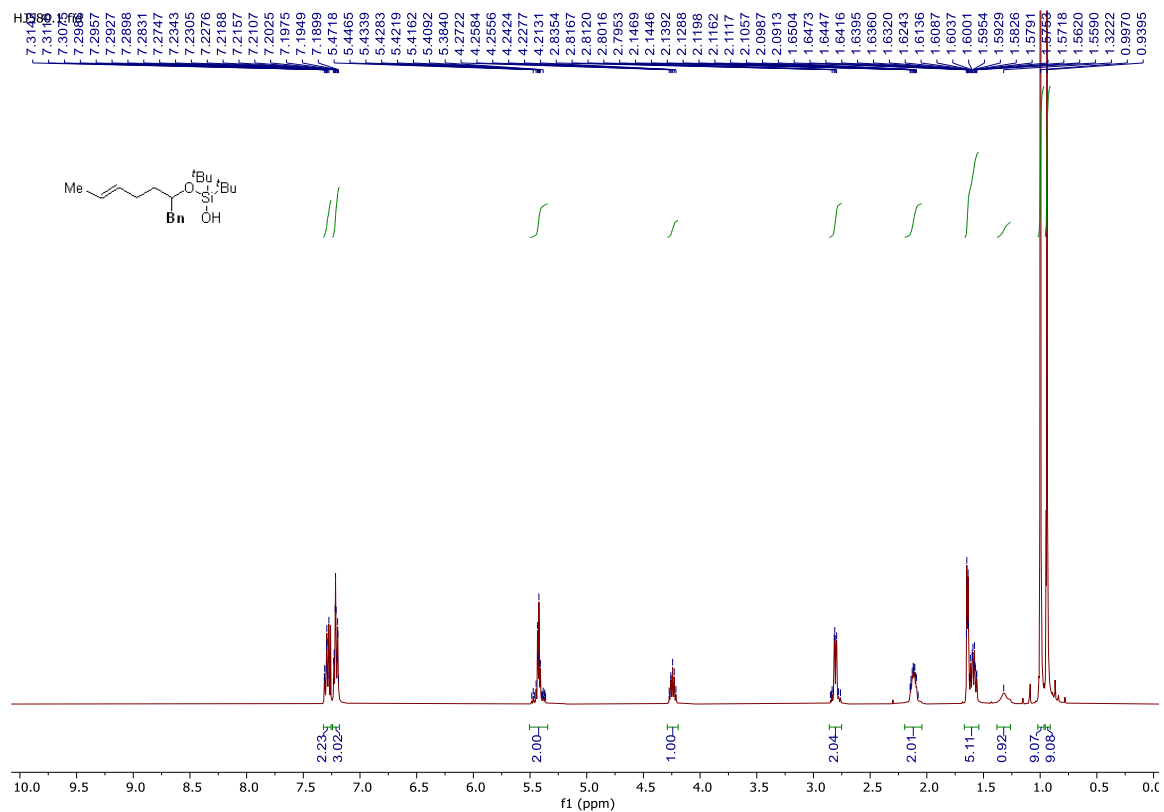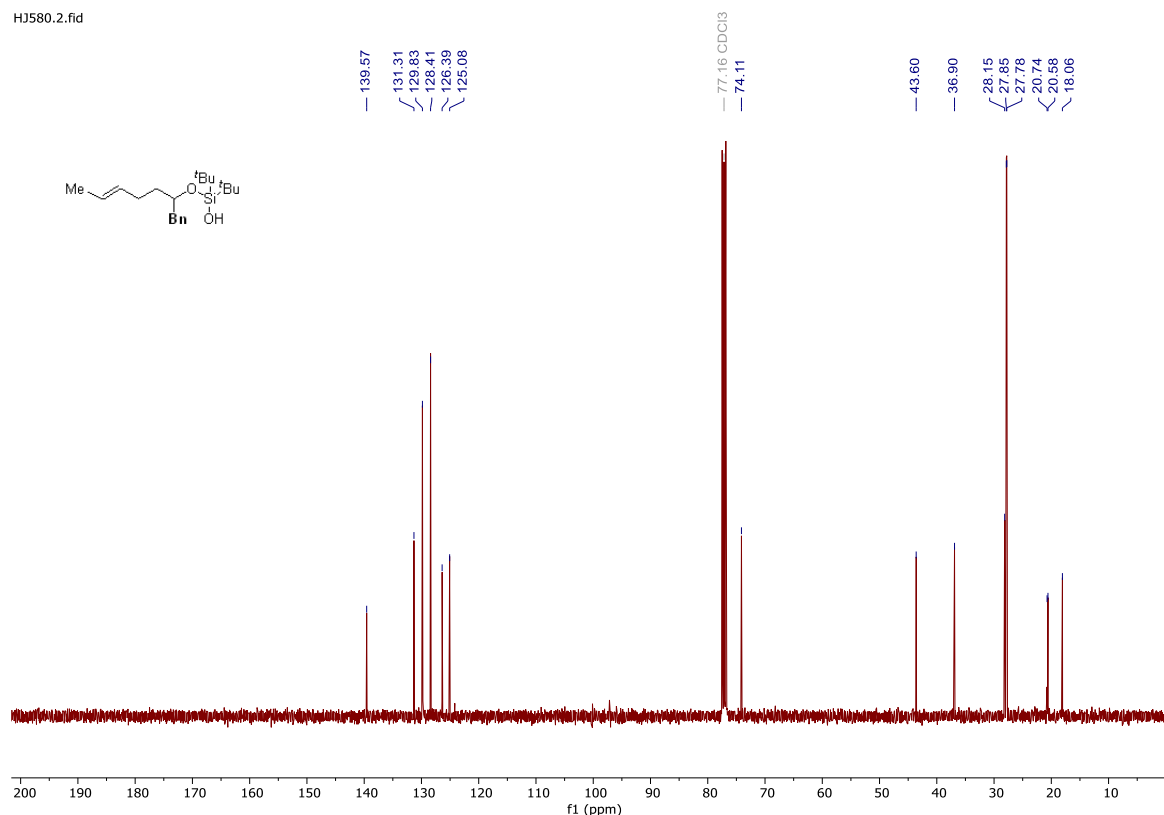

# Compound S39 (CDCl<sub>3</sub>, <sup>1</sup>H NMR: 400 MHz, <sup>13</sup>C{<sup>1</sup>H} NMR: 101 MHz)

HJ285\_Re.1.1.1r

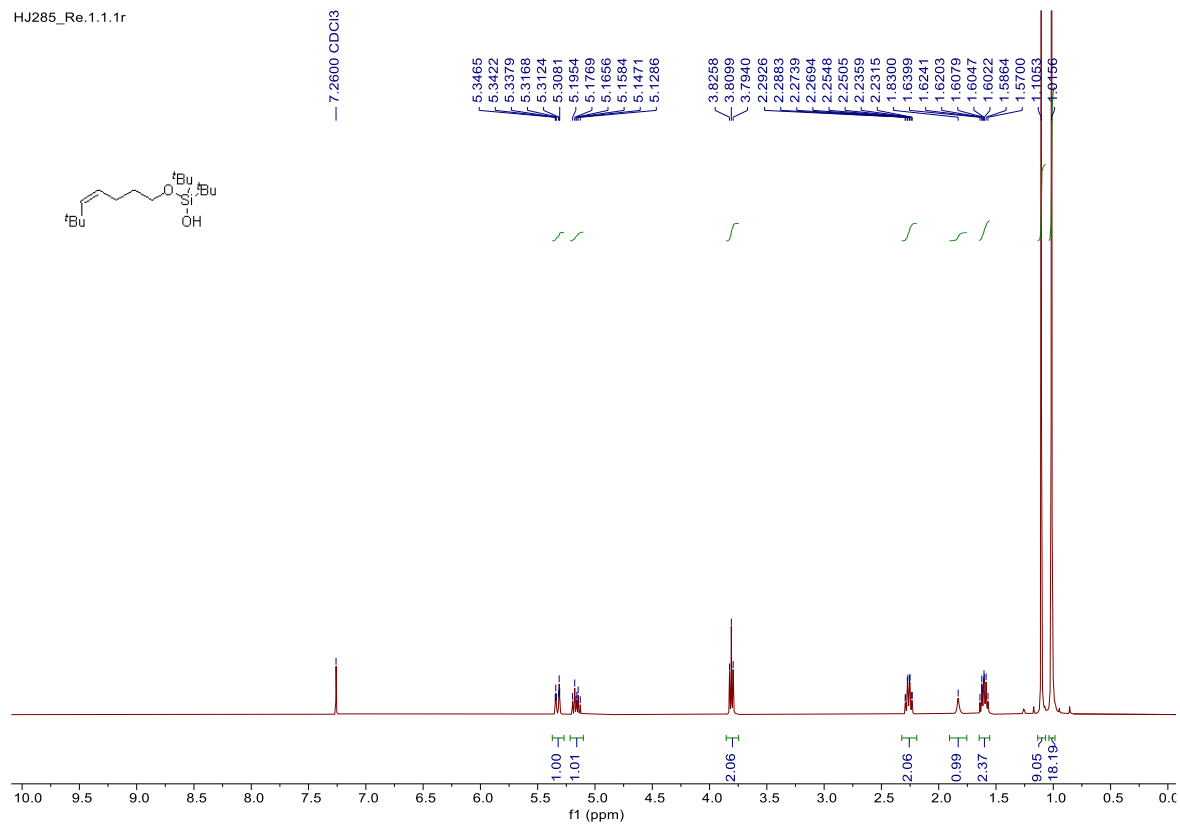

HJ285\_Re.2.1.1r

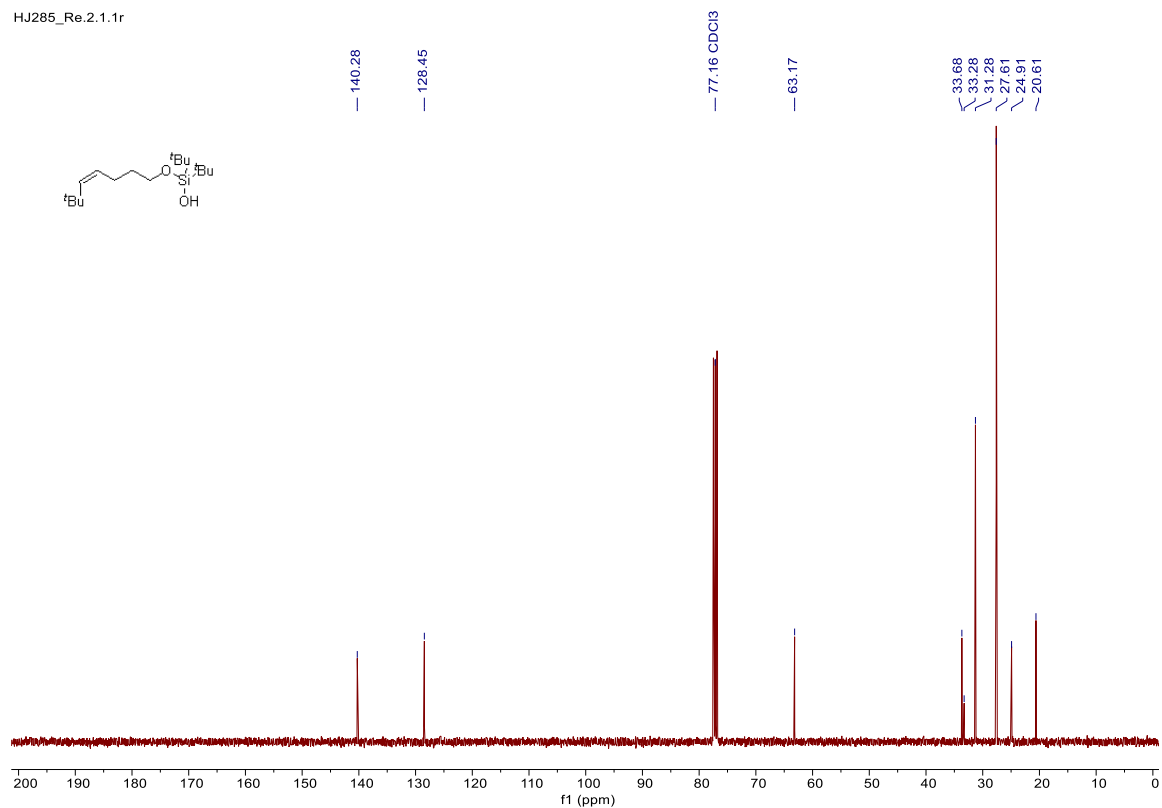

**Compound S41 (CDCl<sub>3</sub>, <sup>1</sup>H NMR: 400 MHz, <sup>13</sup>C{<sup>1</sup>H} NMR: 101 MHz)**

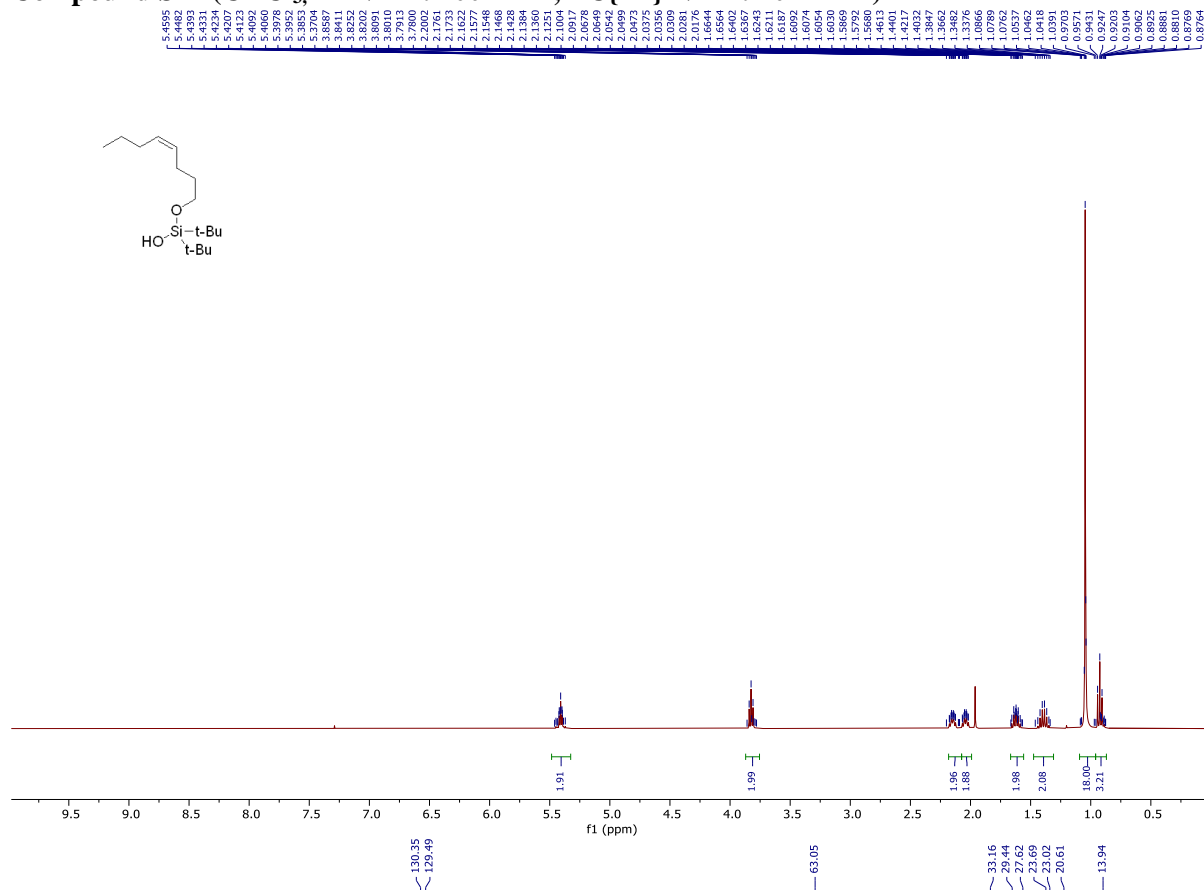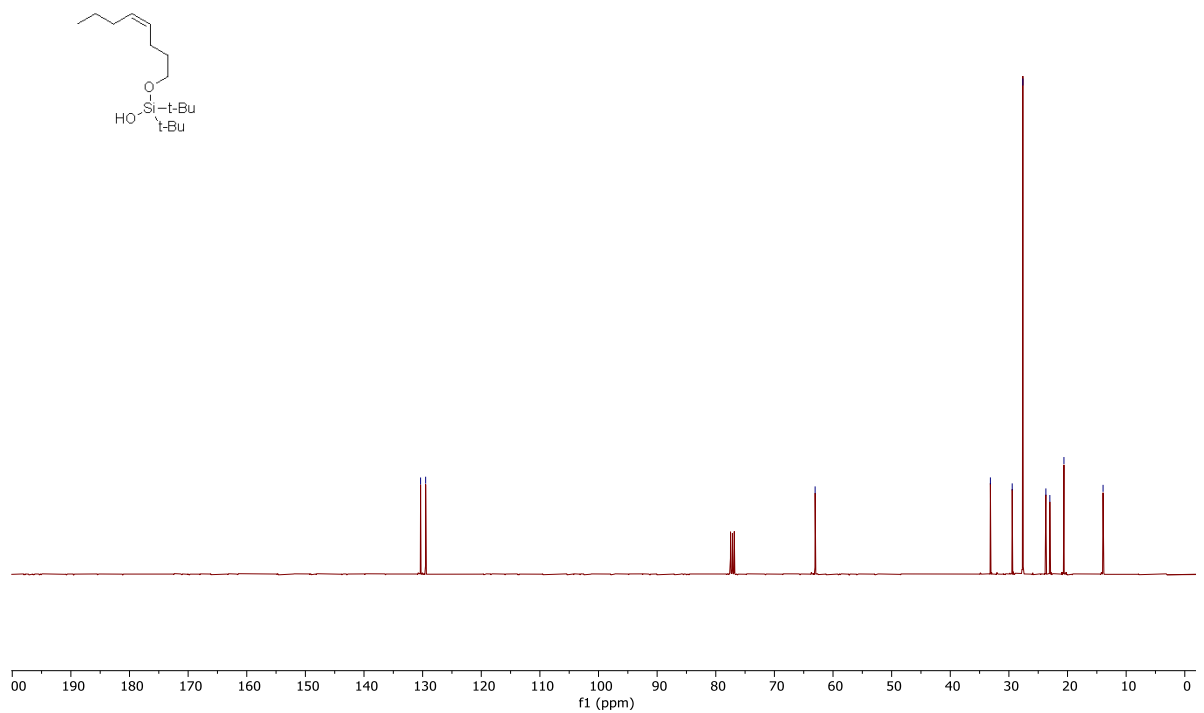



**Compound S43 (CDCl<sub>3</sub>, <sup>1</sup>H NMR: 400 MHz, <sup>13</sup>C{<sup>1</sup>H} NMR: 101 MHz)**

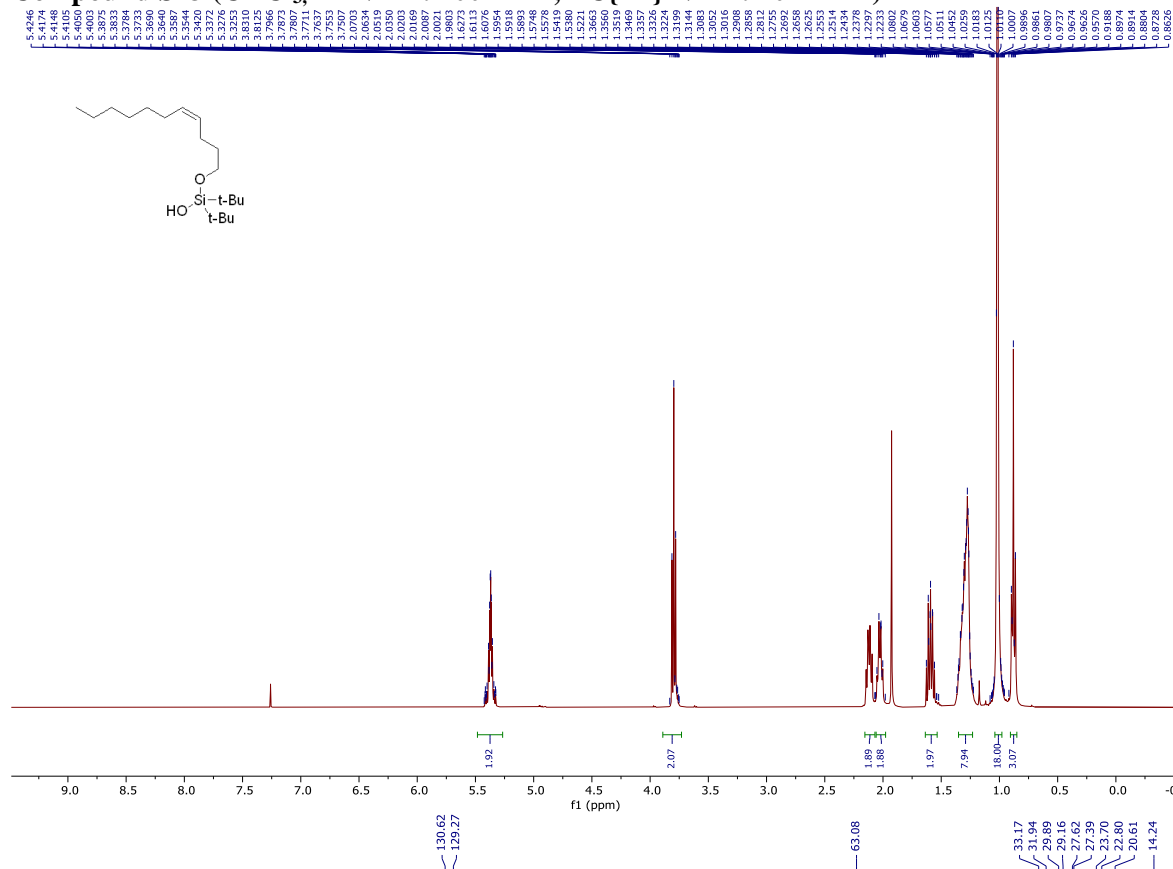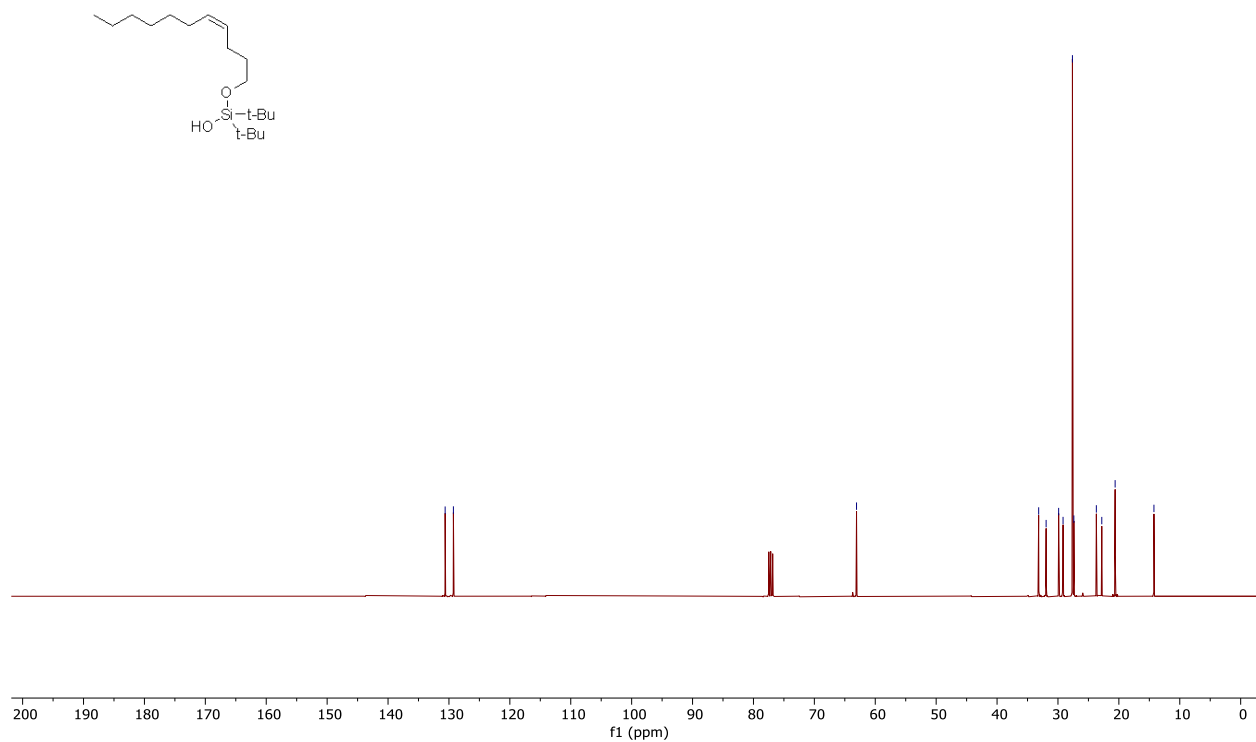

Compound S45 (CDCl<sub>3</sub>, <sup>1</sup>H NMR: 400 MHz, <sup>13</sup>C{<sup>1</sup>H} NMR: 101 MHz)

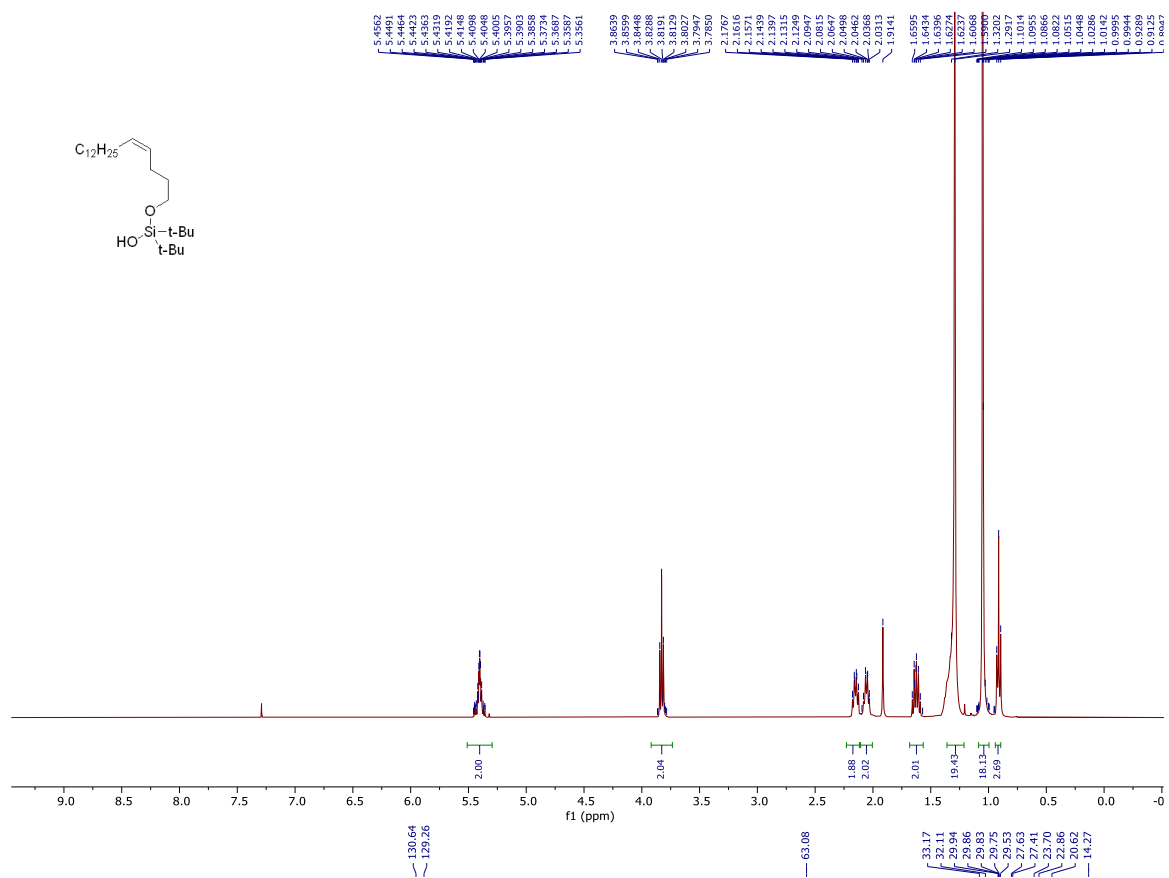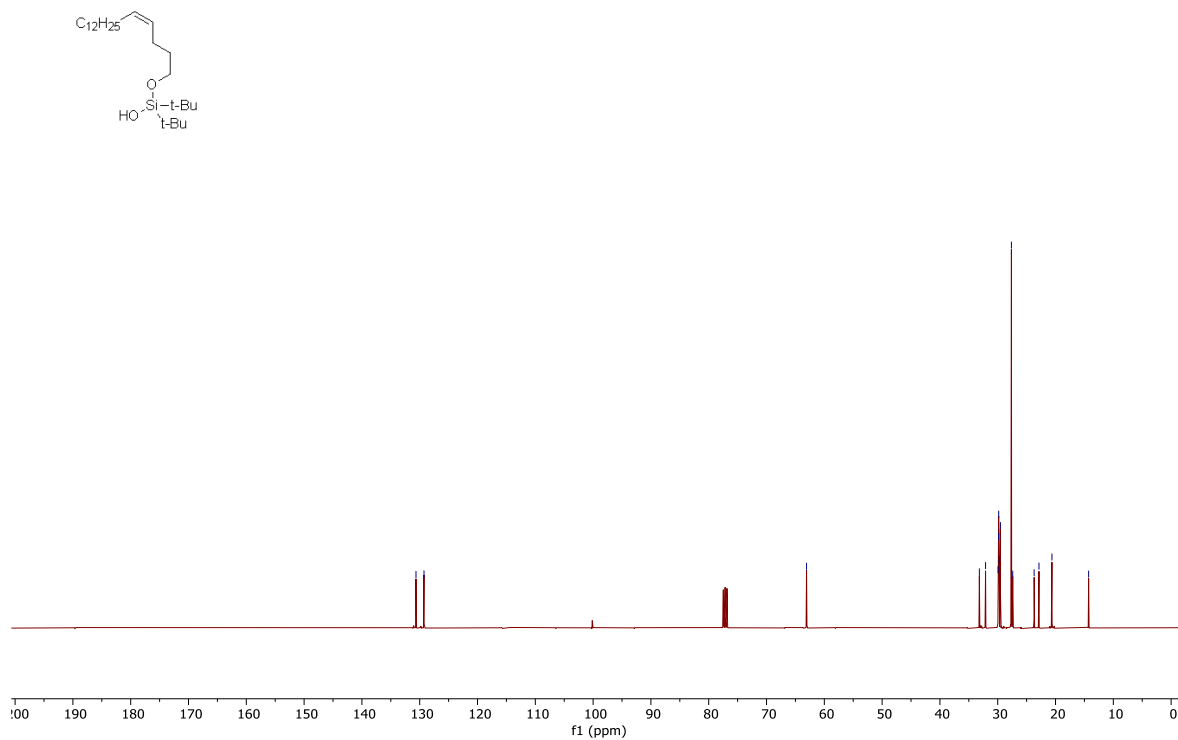

**Compound S47 (CDCl<sub>3</sub>, <sup>1</sup>H NMR: 400 MHz, <sup>13</sup>C{<sup>1</sup>H} NMR: 101 MHz)**

5.4191, 4.4065, 5.3979, 5.3920, 5.3890, 5.3780, 5.3749, 5.3720, 5.3478, 3.8444, 3.8285, 3.7924, 2.1896, 2.1653, 2.1614, 2.1559, 2.1484, 2.1477, 2.1432, 2.1351, 2.1270, 2.1180, 2.0992, 2.0886, 2.0784, 2.0743, 2.0695, 2.0631, 2.0532, 2.0493, 2.0430, 2.0388, 2.0338, 2.0078, 2.0044, 1.6578, 1.6494, 1.6276, 1.6244, 1.6204, 1.6134, 1.6087, 1.6062, 1.5992, 1.5883, 1.5724, 1.5558, 1.5469, 1.5391, 1.5391, 1.5391, 1.2894, 1.2894, 1.2746, 1.2671, 1.2671, 1.2671, 1.2602, 1.2571, 1.2546, 1.2546, 1.2475, 1.2436, 1.2409, 1.2372, 1.2242, 1.2185, 1.2097, 1.2097, 1.2097, 1.0832, 1.0770, 1.0548, 1.0426, 1.0426, 1.0403, 1.0180, 1.0070, 1.0070, 0.9355, 0.9355, 0.9174, 0.9174, 0.9071, 0.8984, 0.8984, 0.8902, 0.8812, 0.8802, 0.8807.

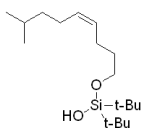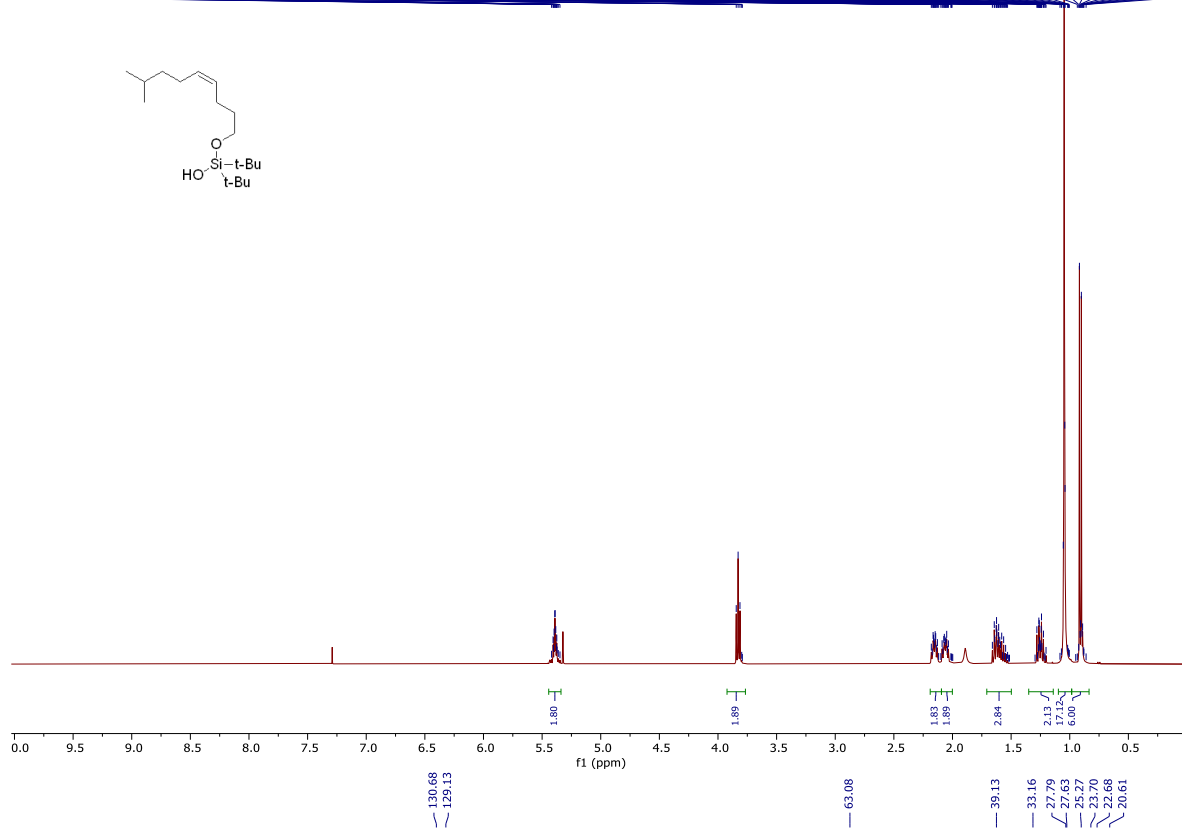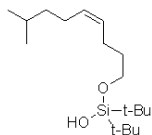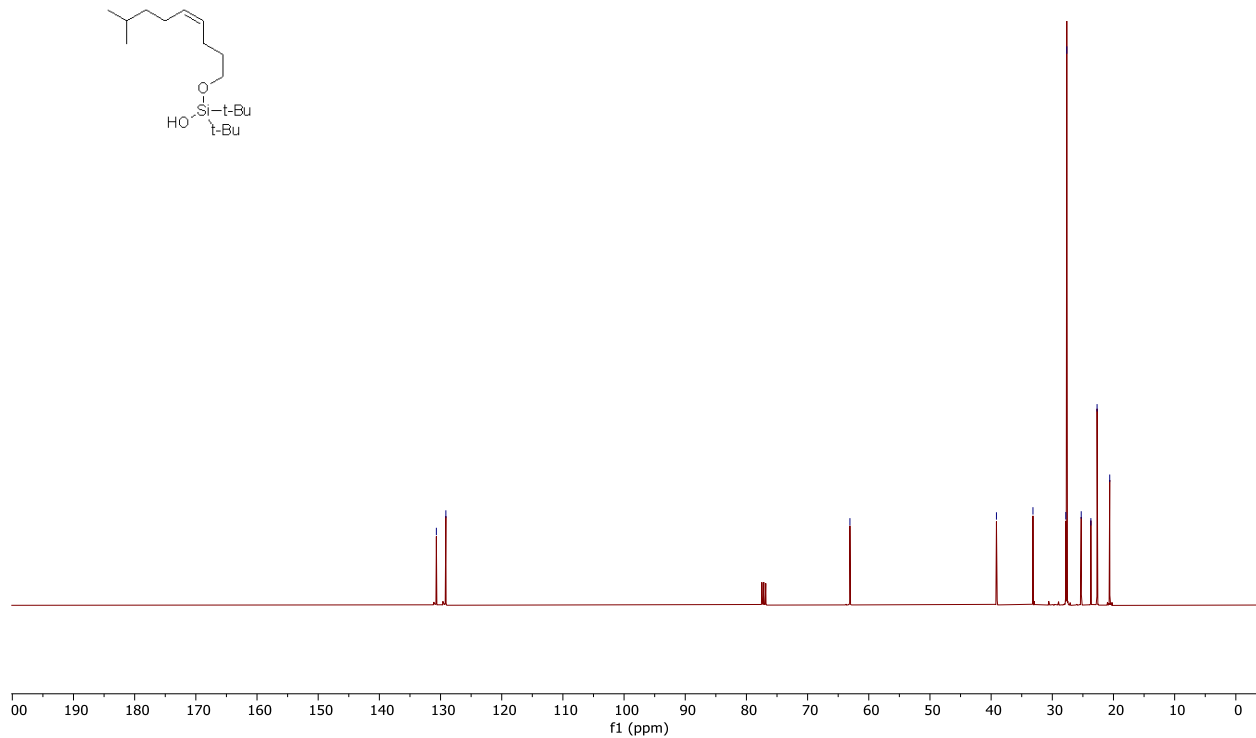

**Compound S49 (CDCl<sub>3</sub>, <sup>1</sup>H NMR: 400 MHz, <sup>13</sup>C{<sup>1</sup>H} NMR: 101 MHz)**

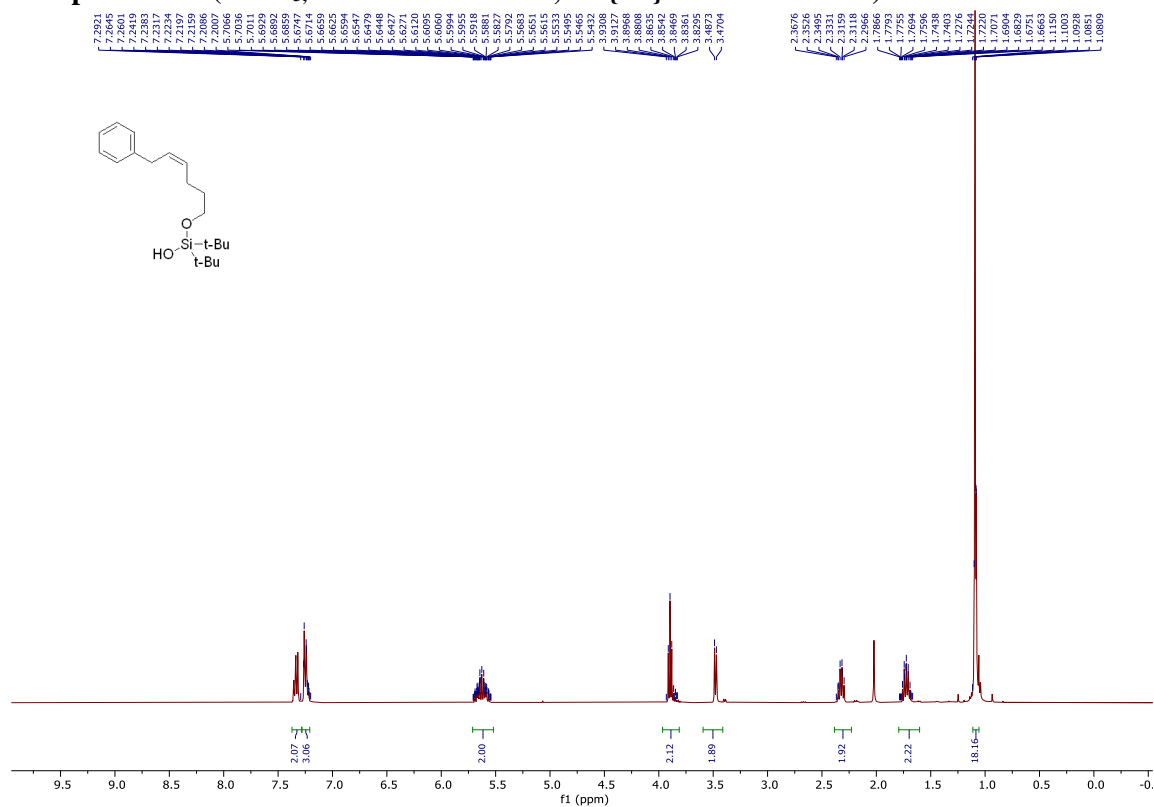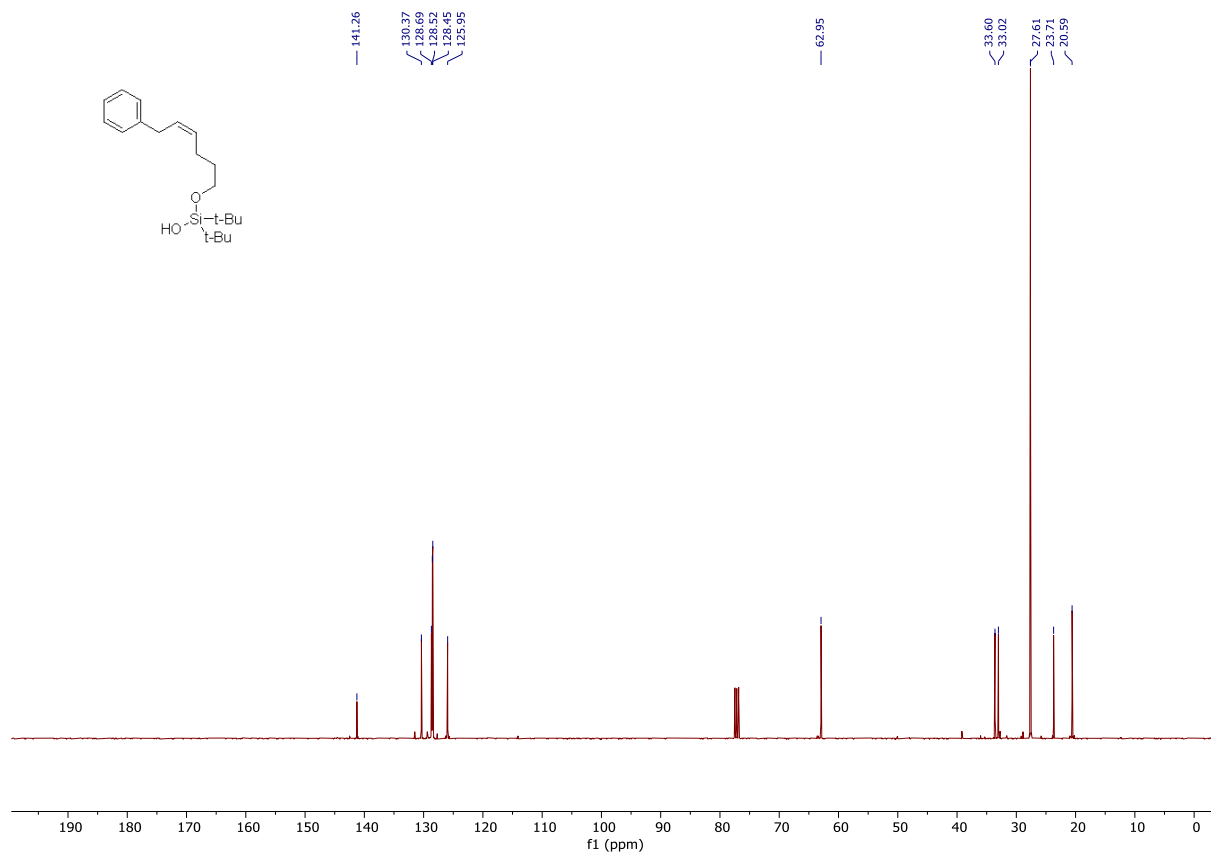

**Compound S51 (CDCl<sub>3</sub>, <sup>1</sup>H NMR: 400 MHz, <sup>13</sup>C{<sup>1</sup>H} NMR: 101 MHz)**

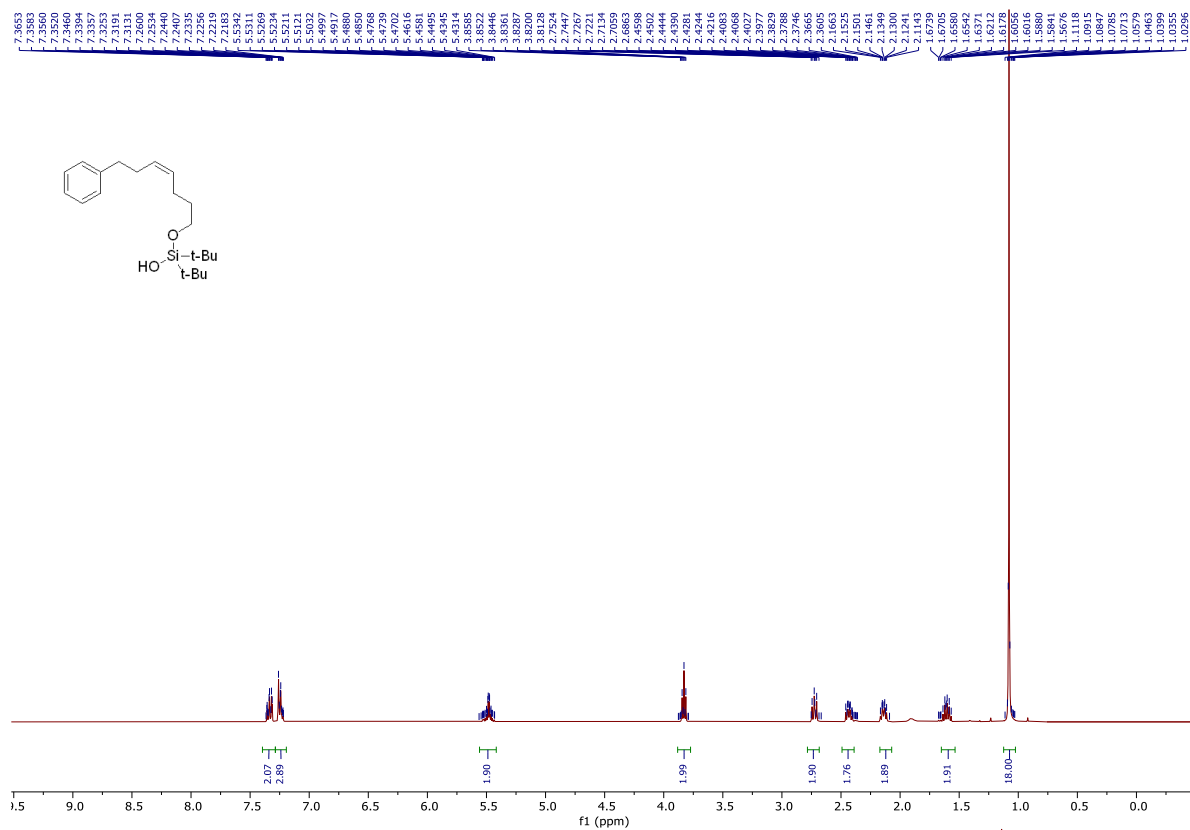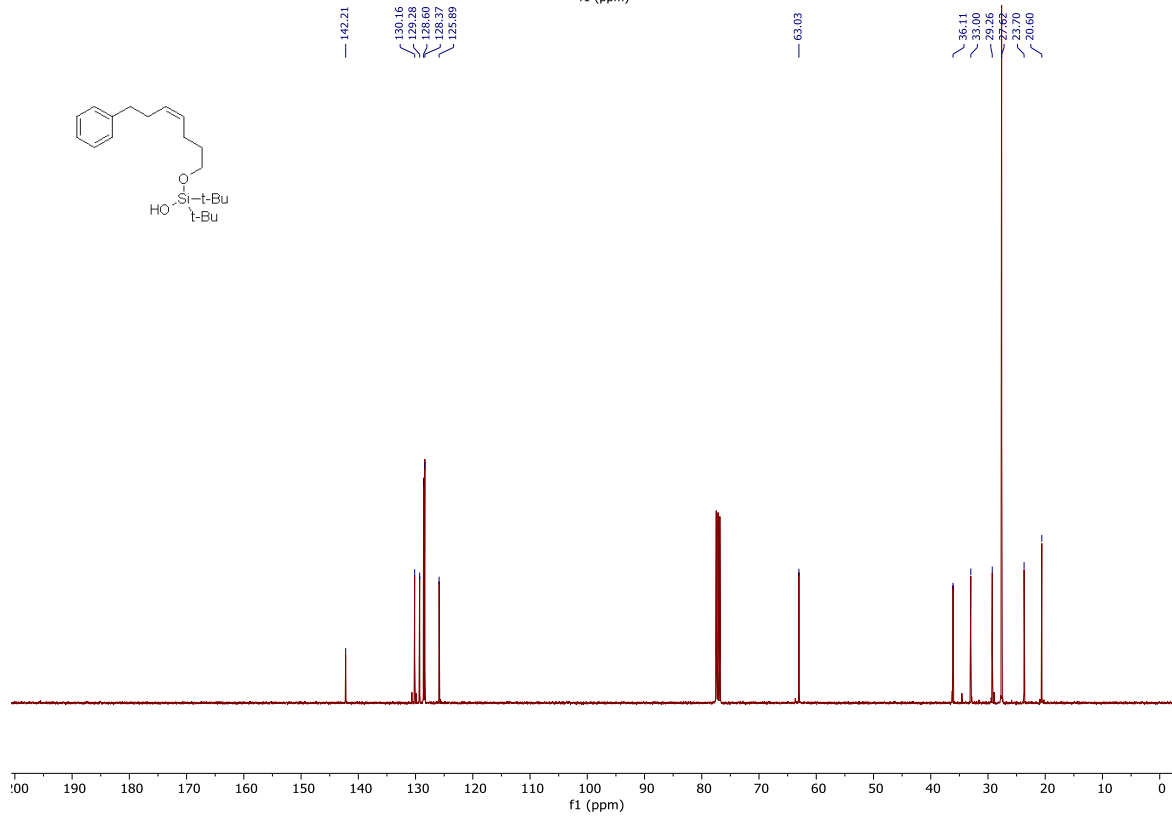

Compound S53 (CDCl<sub>3</sub>, <sup>1</sup>H NMR: 400 MHz, <sup>13</sup>C{<sup>1</sup>H} NMR: 101 MHz)

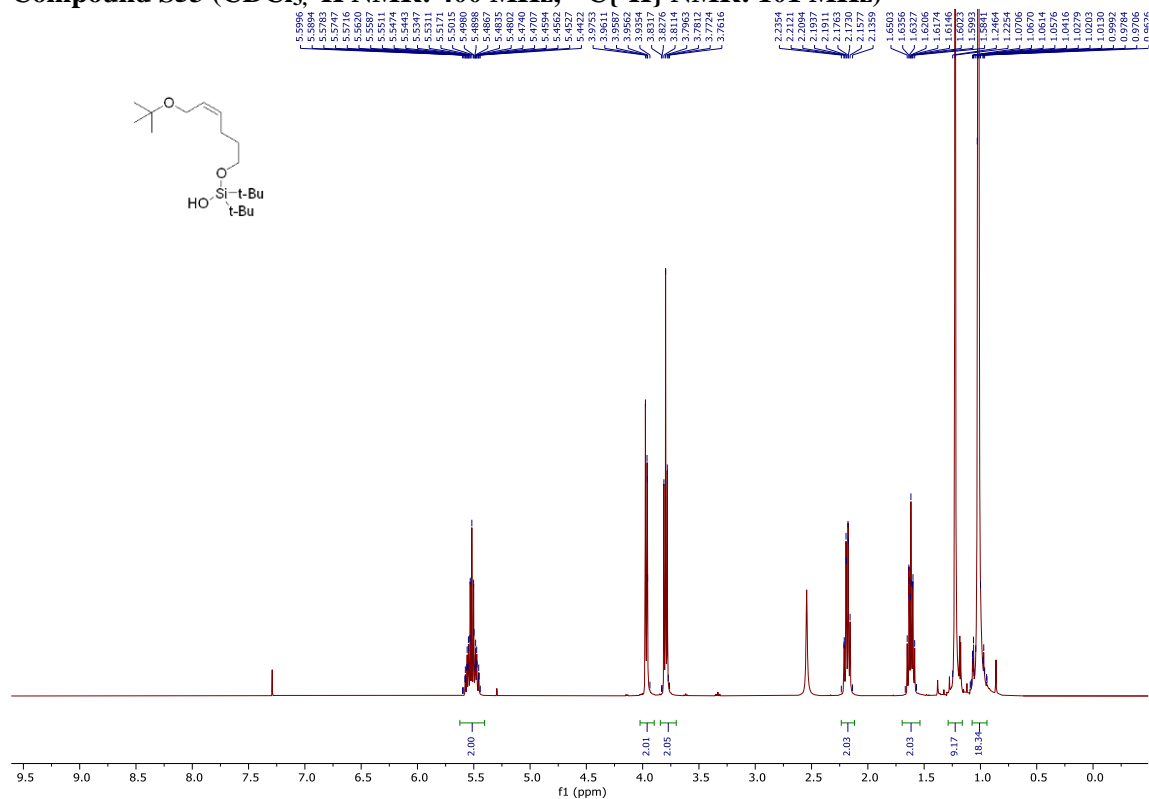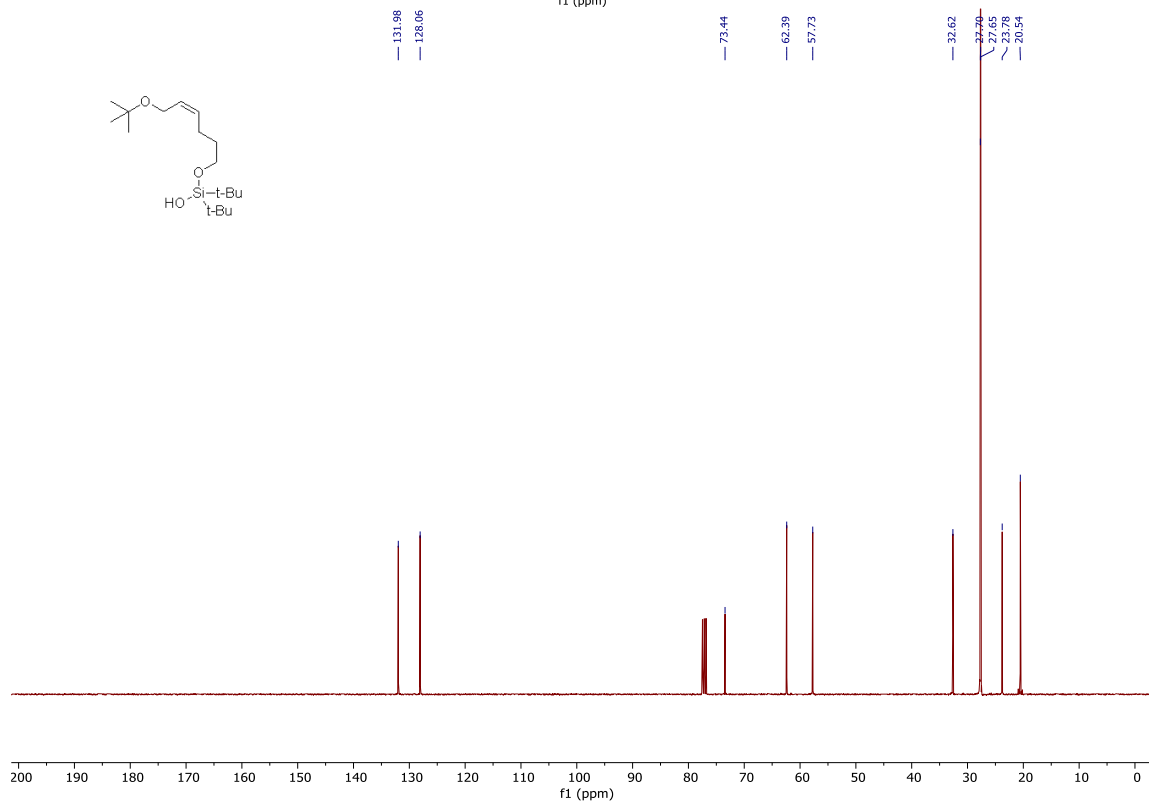

**Compound S55 (CDCl<sub>3</sub>, <sup>1</sup>H NMR: 400 MHz, <sup>13</sup>C{<sup>1</sup>H} NMR: 101 MHz)**

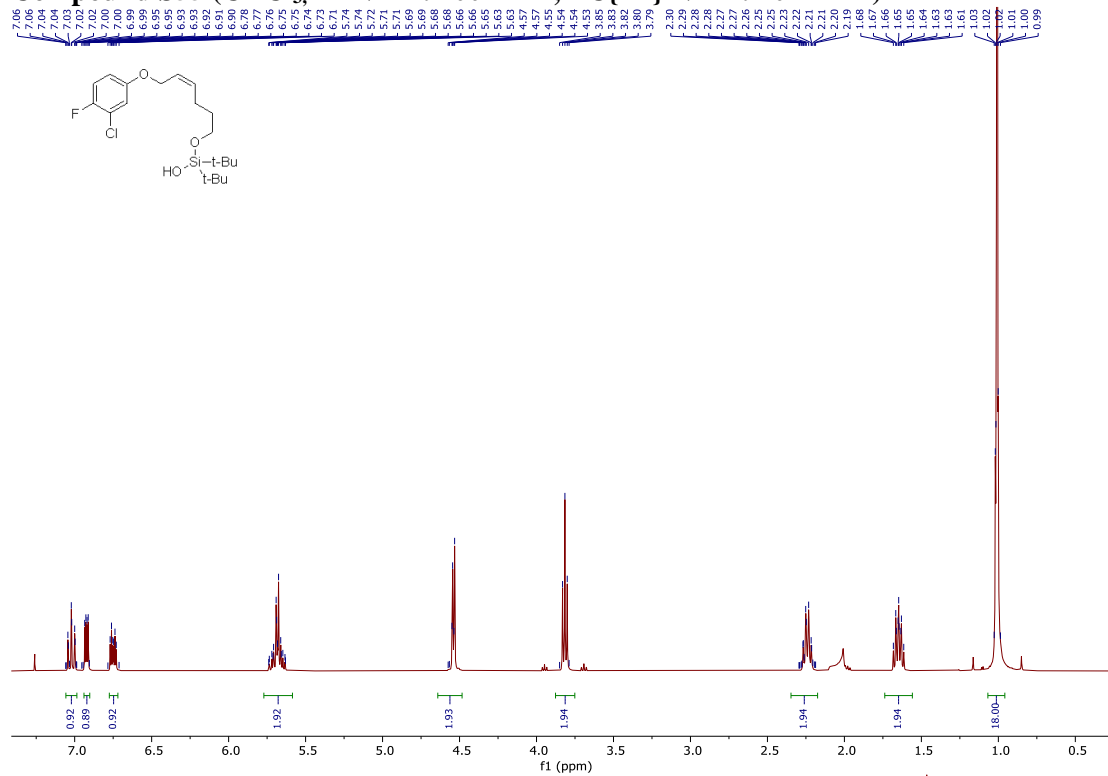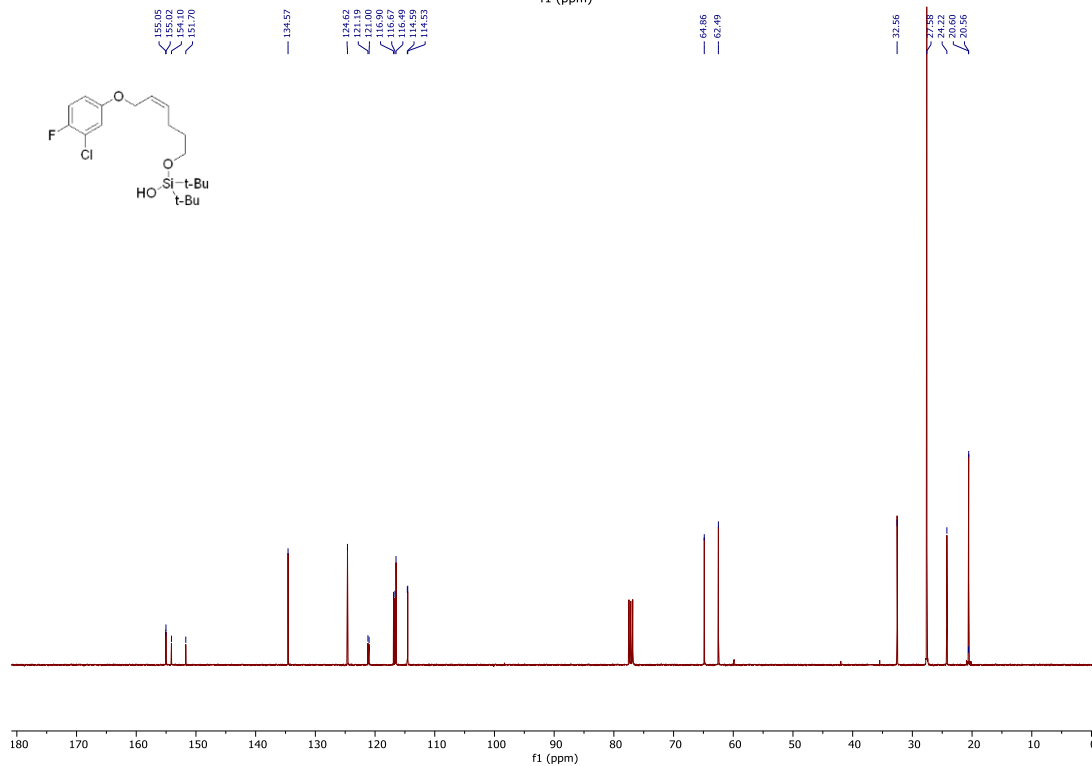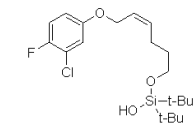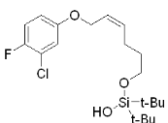

**Compound S57 (CDCl<sub>3</sub>, <sup>1</sup>H NMR: 400 MHz, <sup>13</sup>C{<sup>1</sup>H} NMR: 101 MHz)**

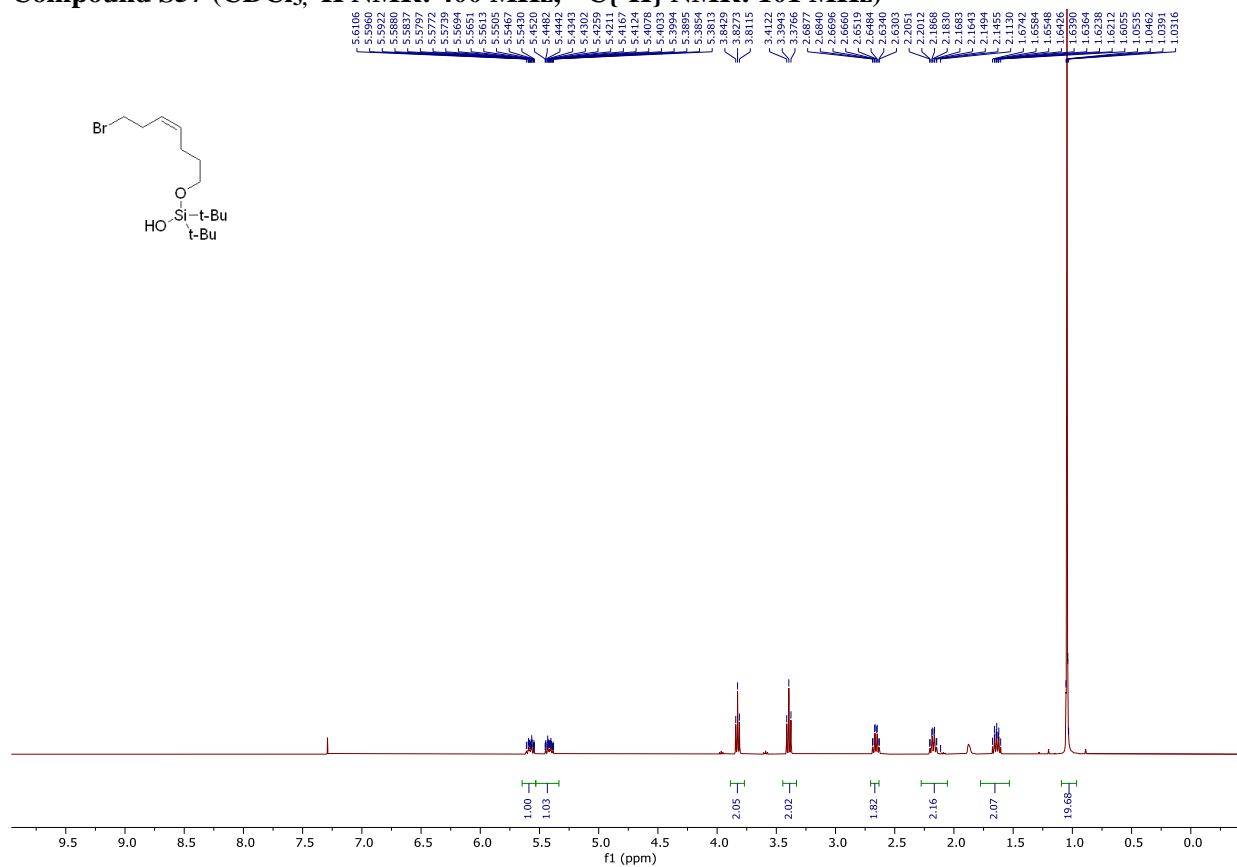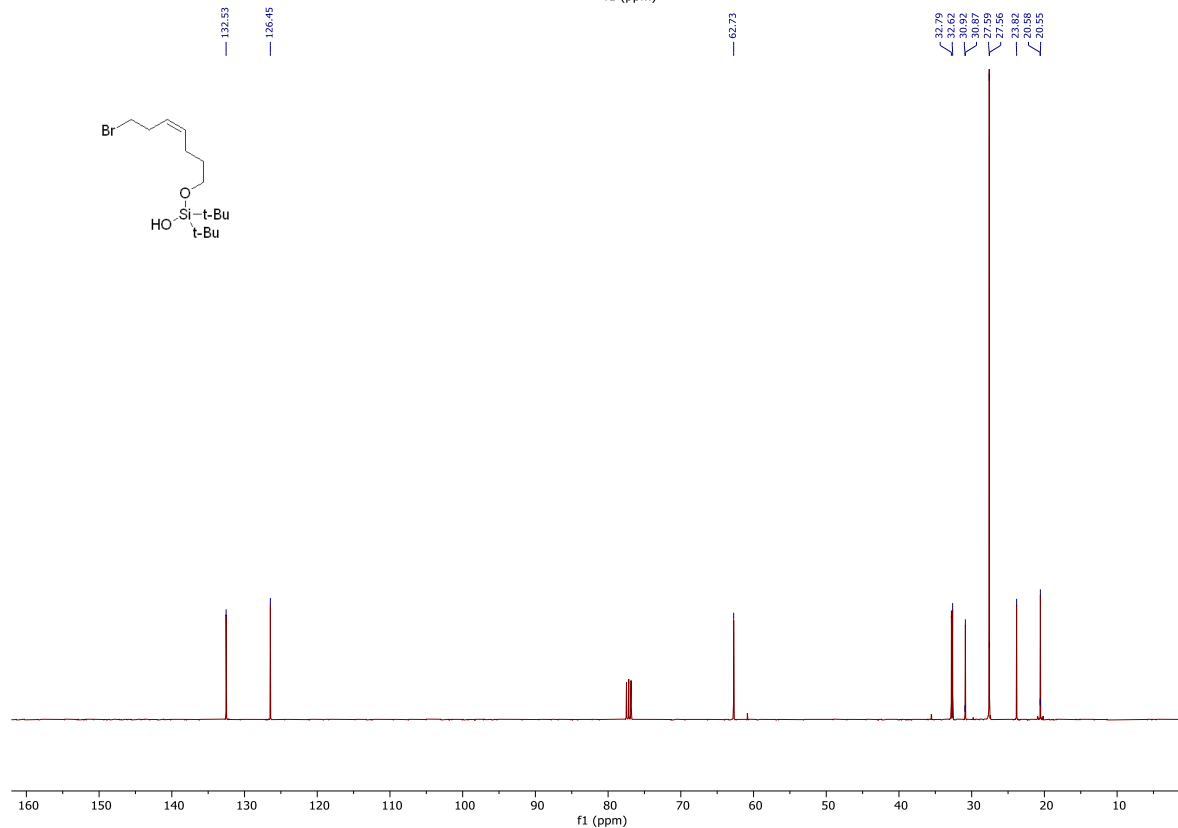



Compound S59 (CDCl<sub>3</sub>, <sup>1</sup>H NMR: 400 MHz, <sup>13</sup>C{<sup>1</sup>H} NMR: 101 MHz)

HJ301\_1H.1.1.1r

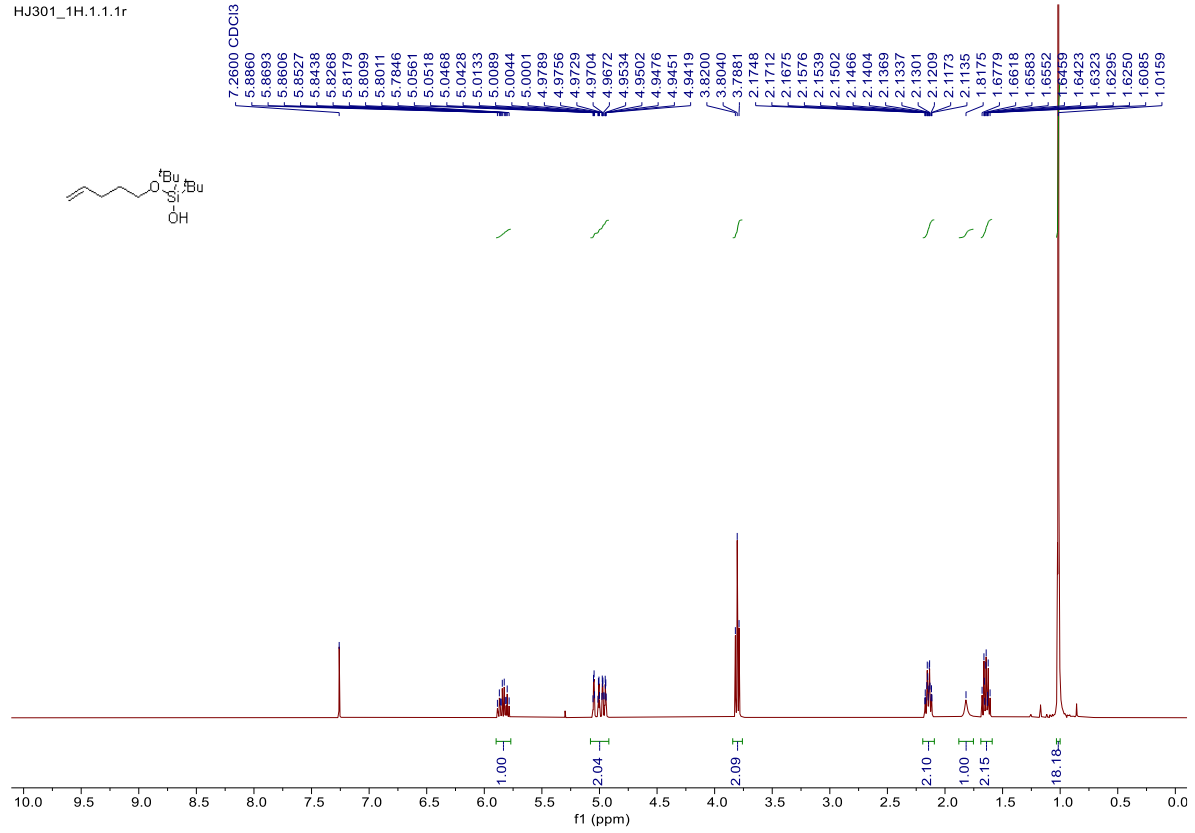

HJ301\_13C.1.1.1r

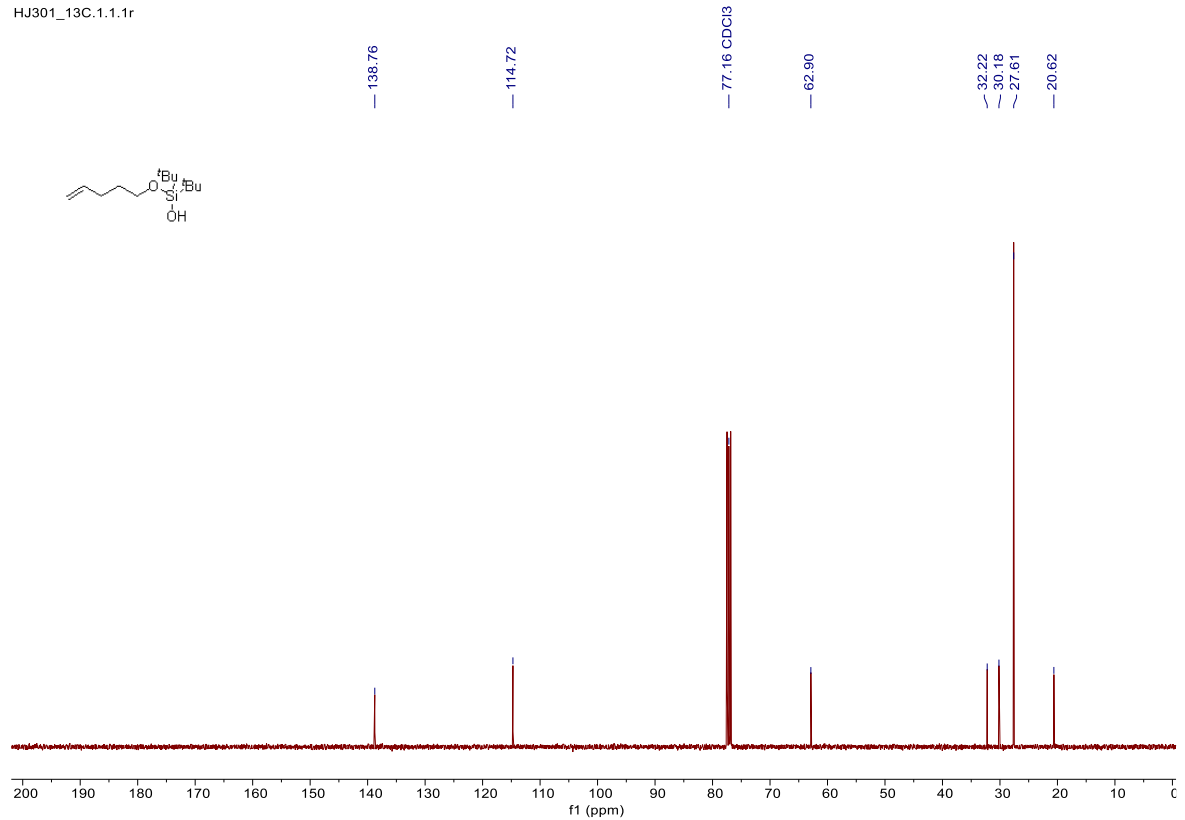

**Compound S61 (CDCl<sub>3</sub>, <sup>1</sup>H NMR: 400 MHz, <sup>13</sup>C{<sup>1</sup>H} NMR: 101 MHz)**

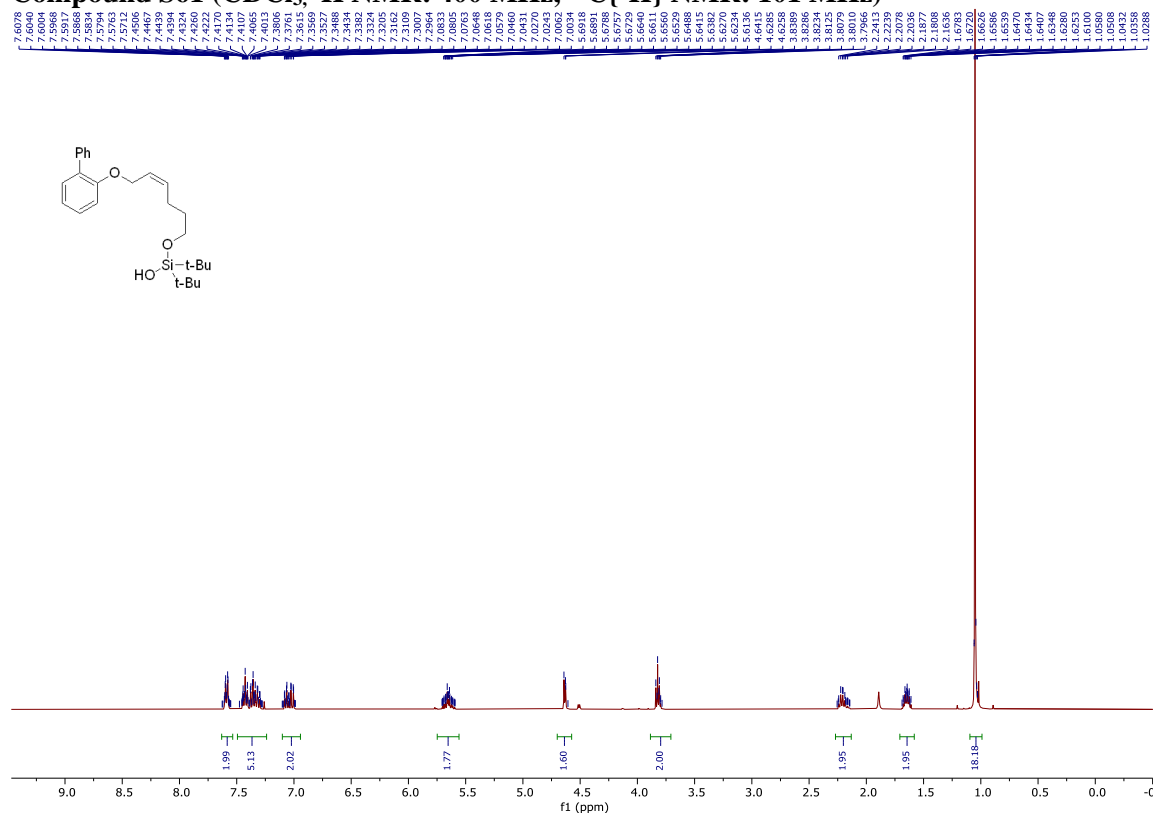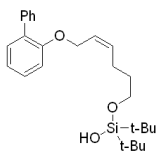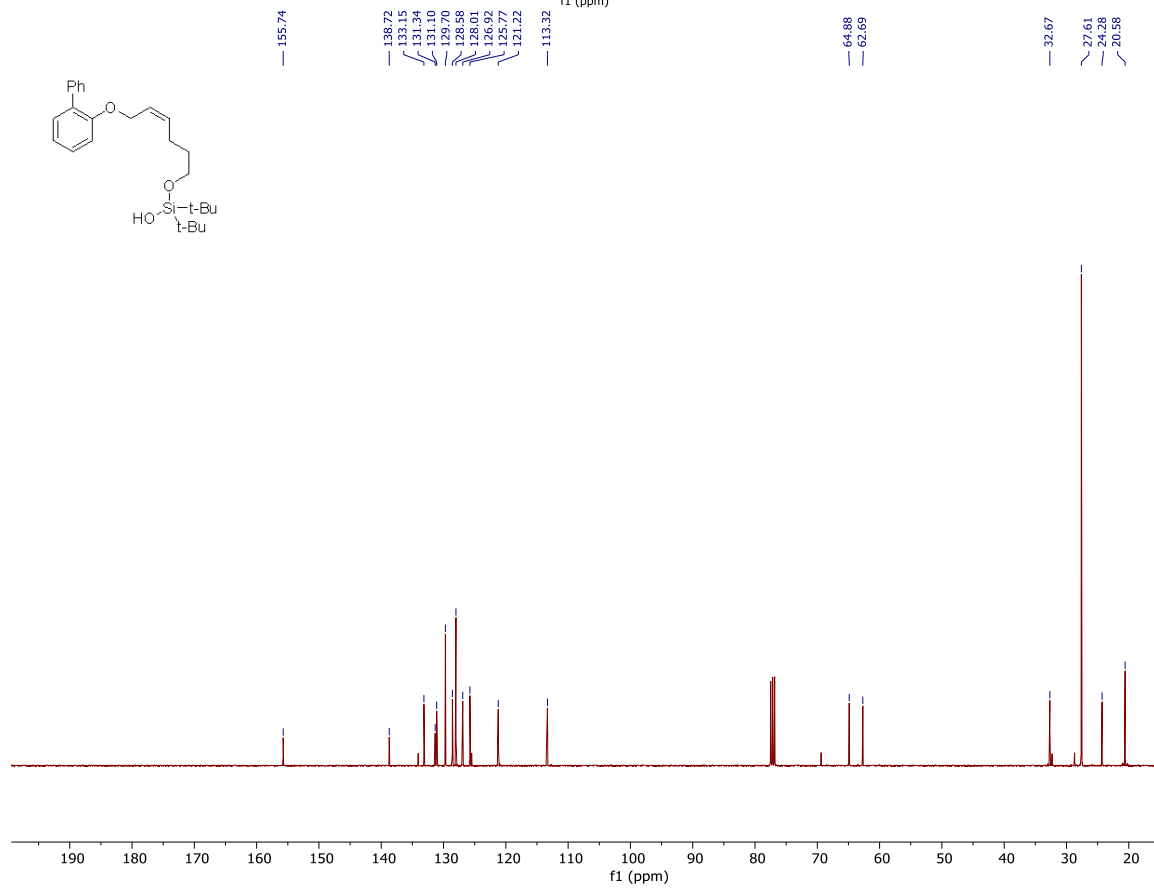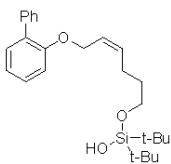

# Compound S63 (CDCl<sub>3</sub>, <sup>1</sup>H NMR: 400 MHz, <sup>13</sup>C{<sup>1</sup>H} NMR: 101 MHz)

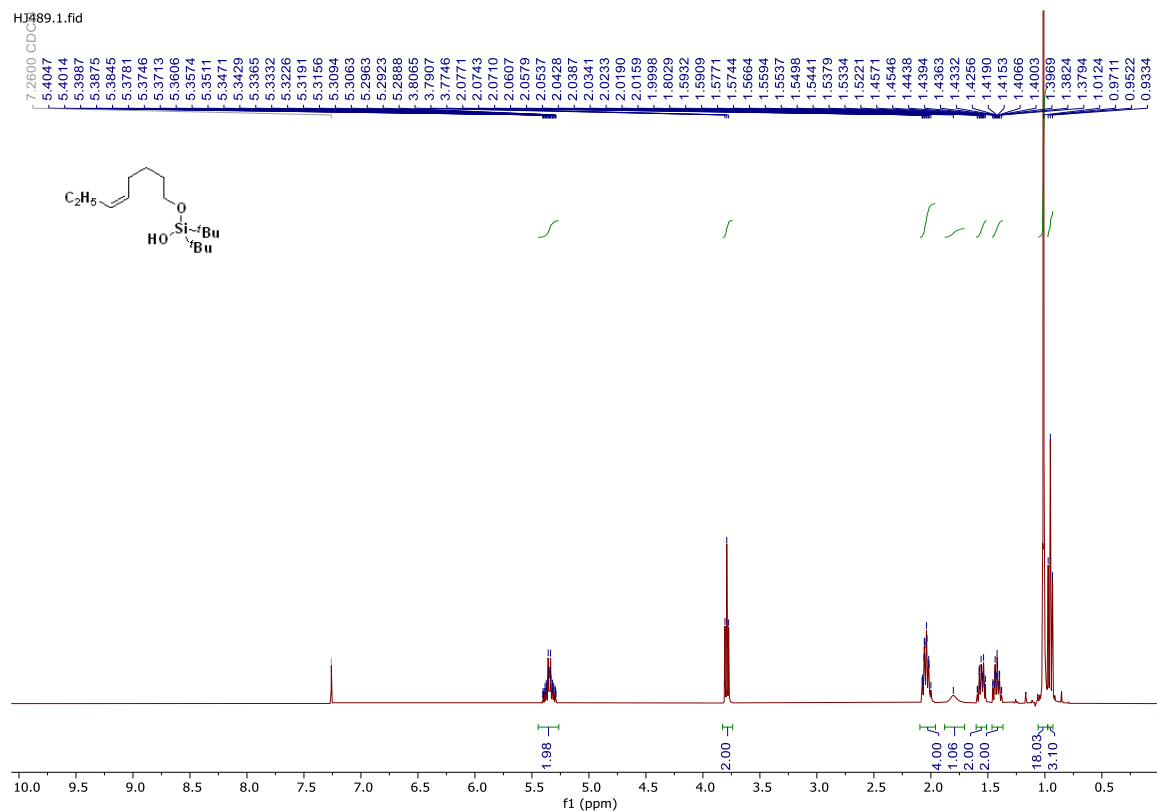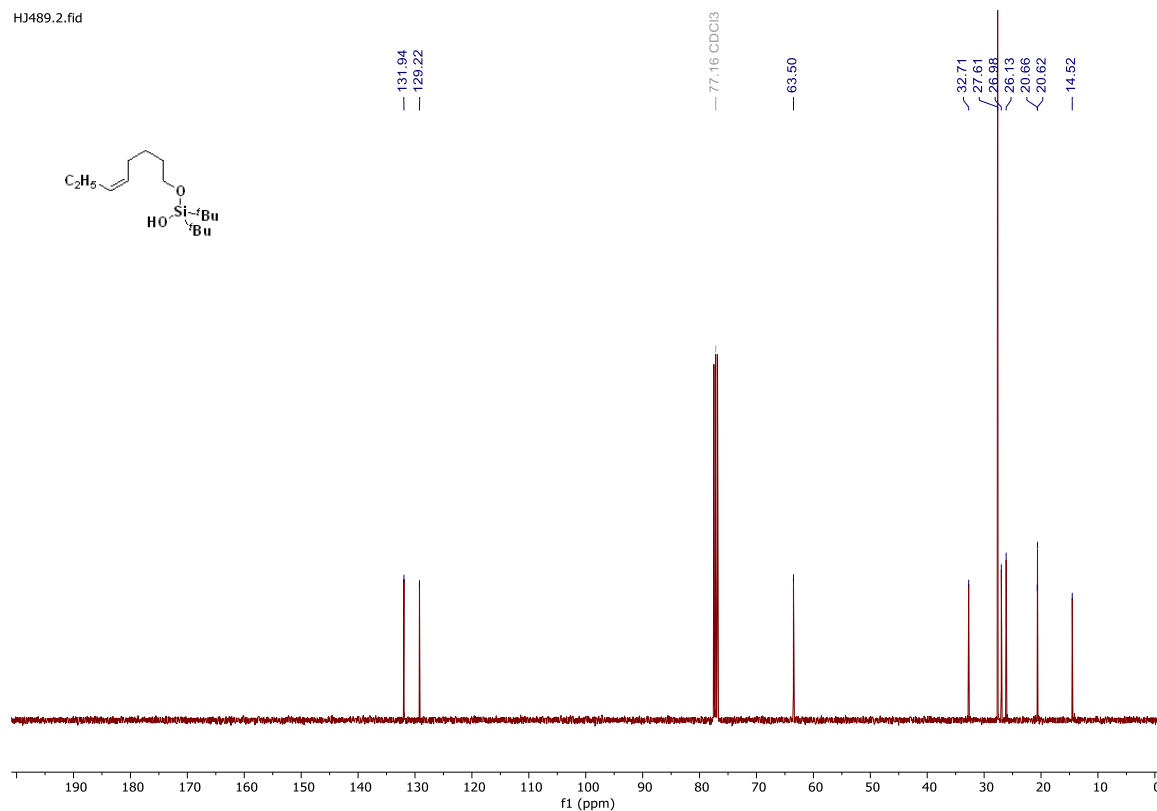

Compound S65 (CDCl<sub>3</sub>, <sup>1</sup>H NMR: 400 MHz, <sup>13</sup>C{<sup>1</sup>H} NMR: 101 MHz)

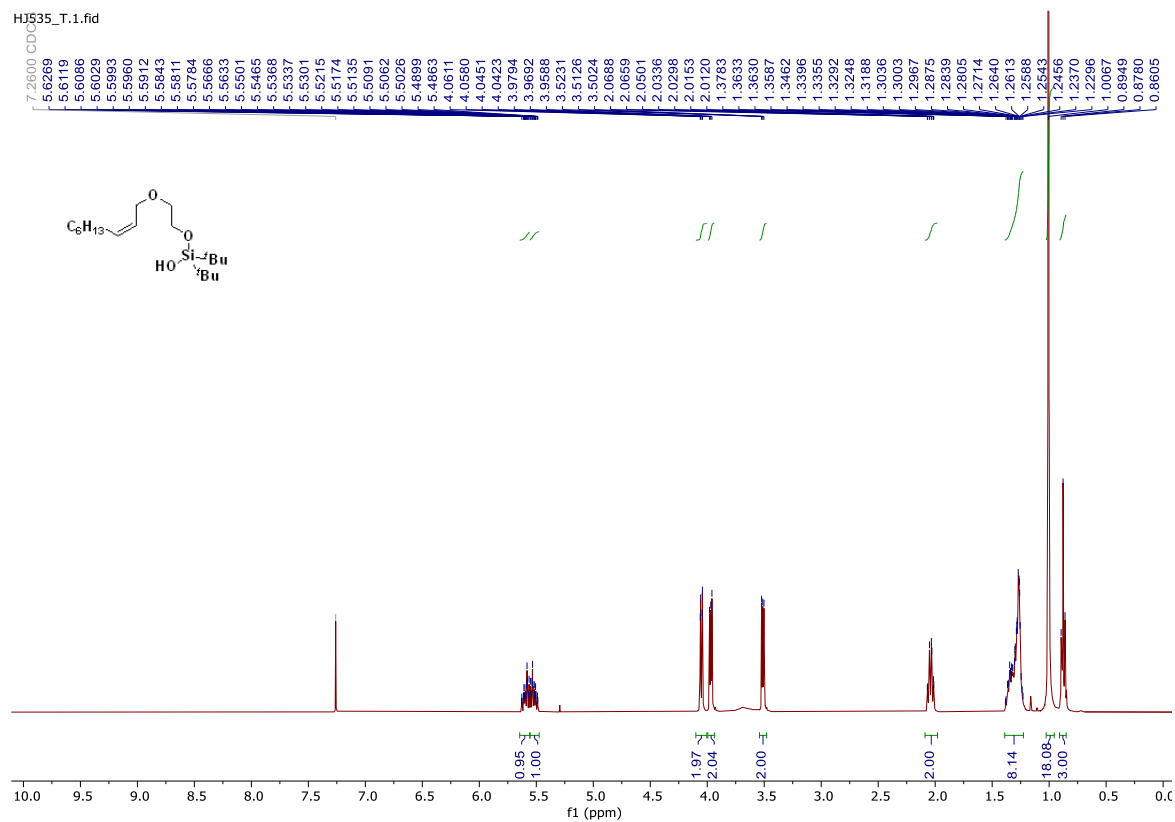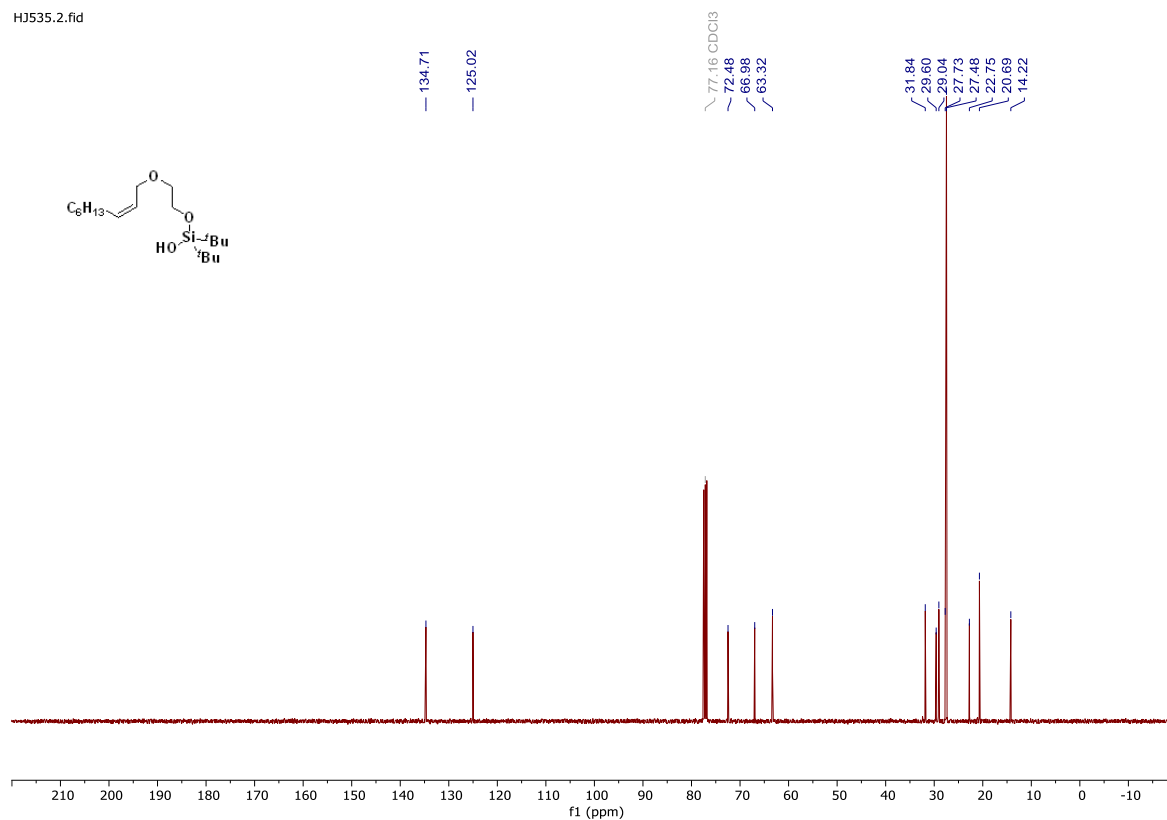

# Compound S67 (CDCl<sub>3</sub>, <sup>1</sup>H NMR: 400 MHz, <sup>13</sup>C{<sup>1</sup>H} NMR: 101 MHz)

HJ568\_T.1.fid

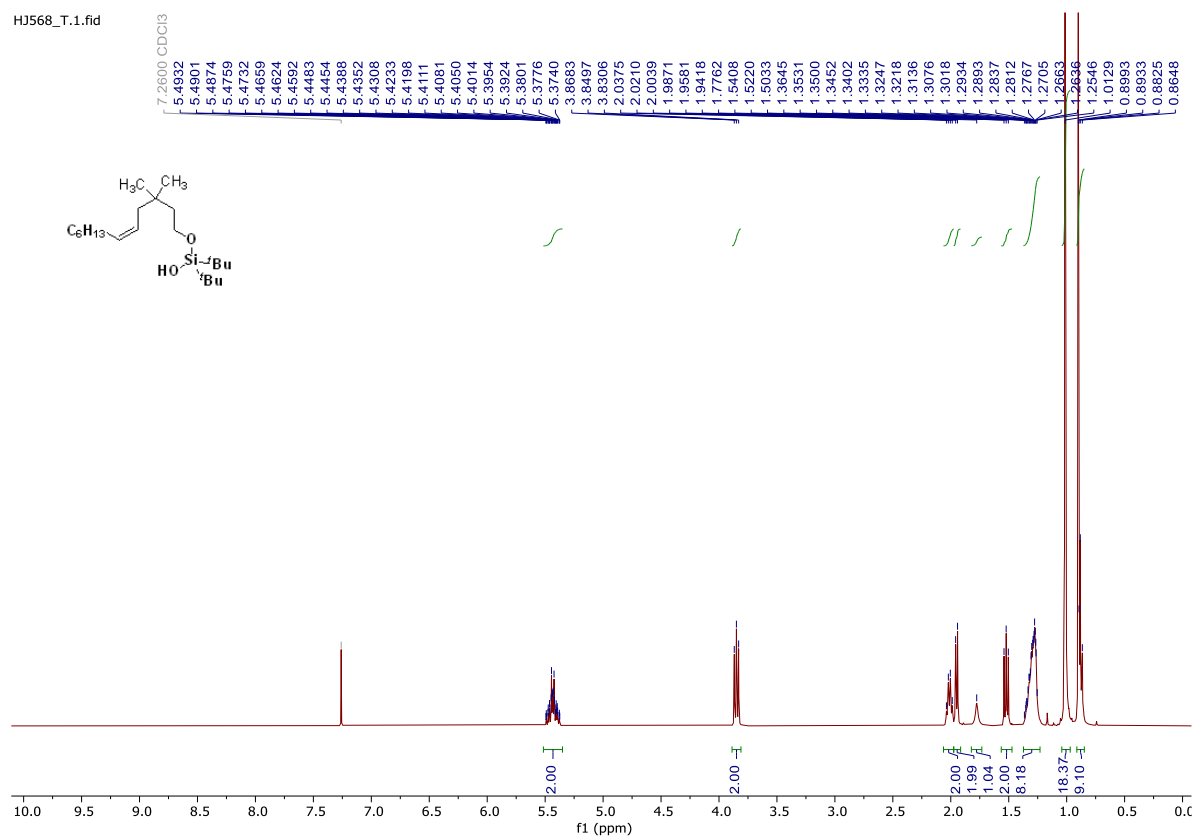

HJ568\_T.2.fid

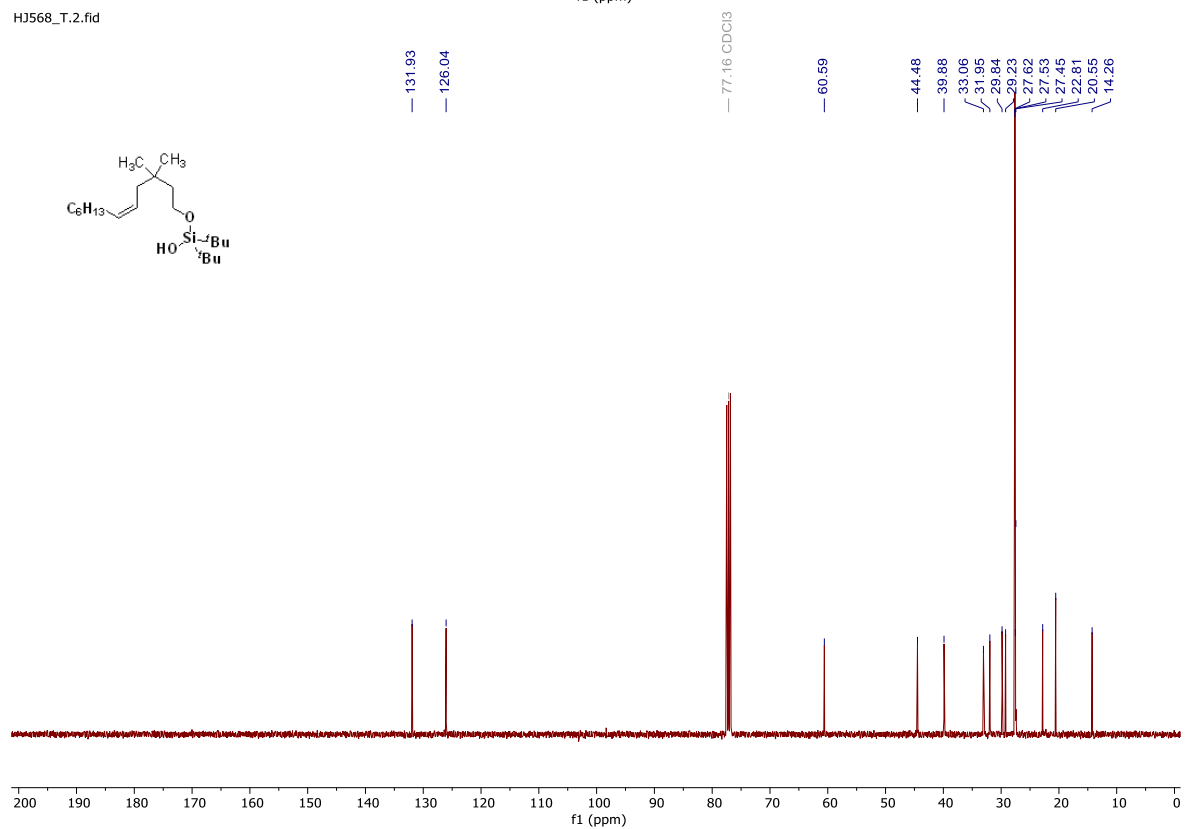

# Compound S69 (CDCl<sub>3</sub>, <sup>1</sup>H NMR: 400 MHz, <sup>13</sup>C{<sup>1</sup>H} NMR: 101 MHz)

HJ606.1.fid

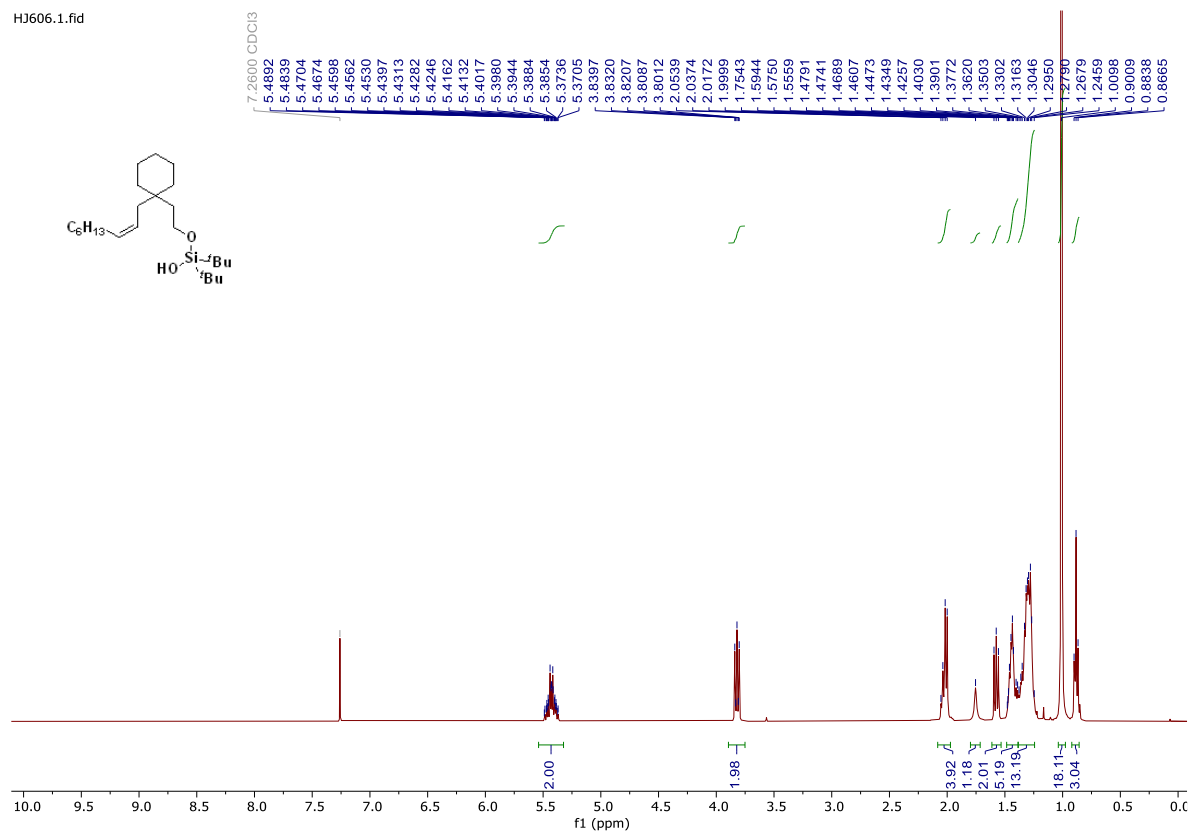

HJ606.2.fid

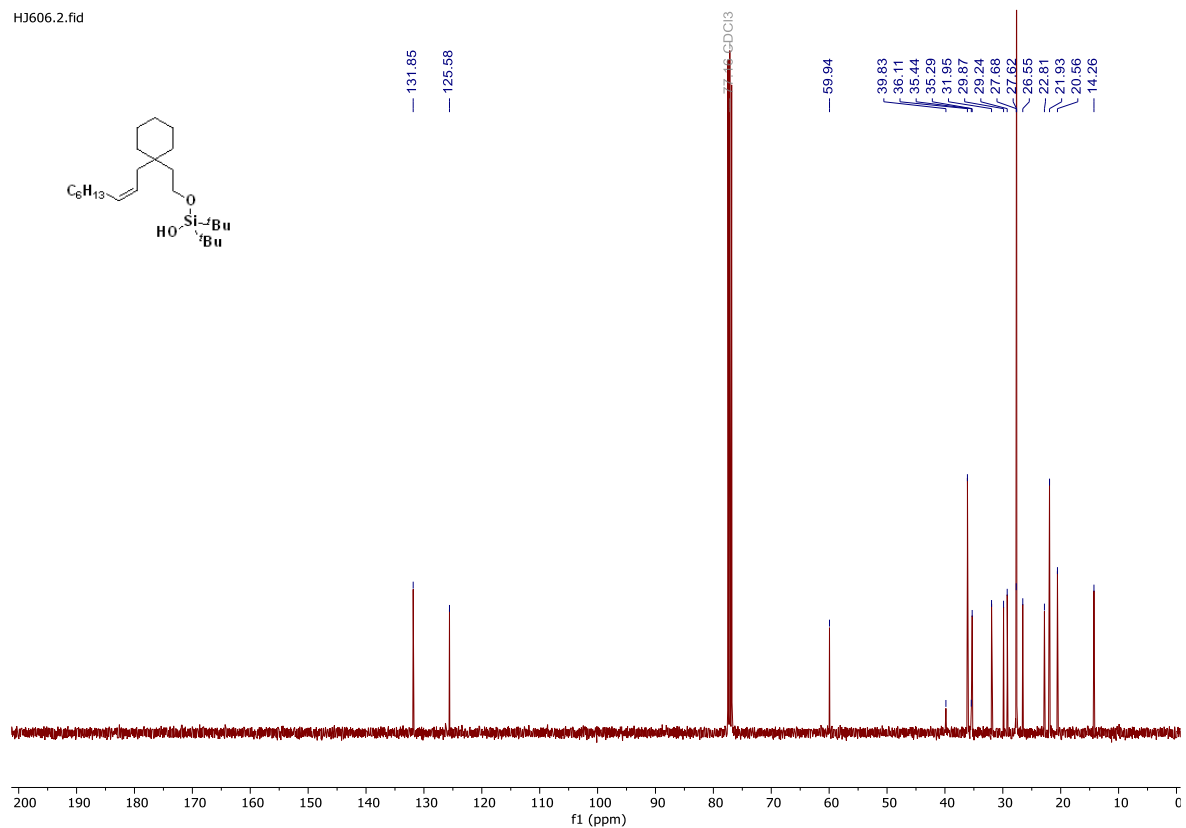

**Compound S71 (CDCl<sub>3</sub>, <sup>1</sup>H NMR: 400 MHz, <sup>13</sup>C{<sup>1</sup>H} NMR: 101 MHz)**

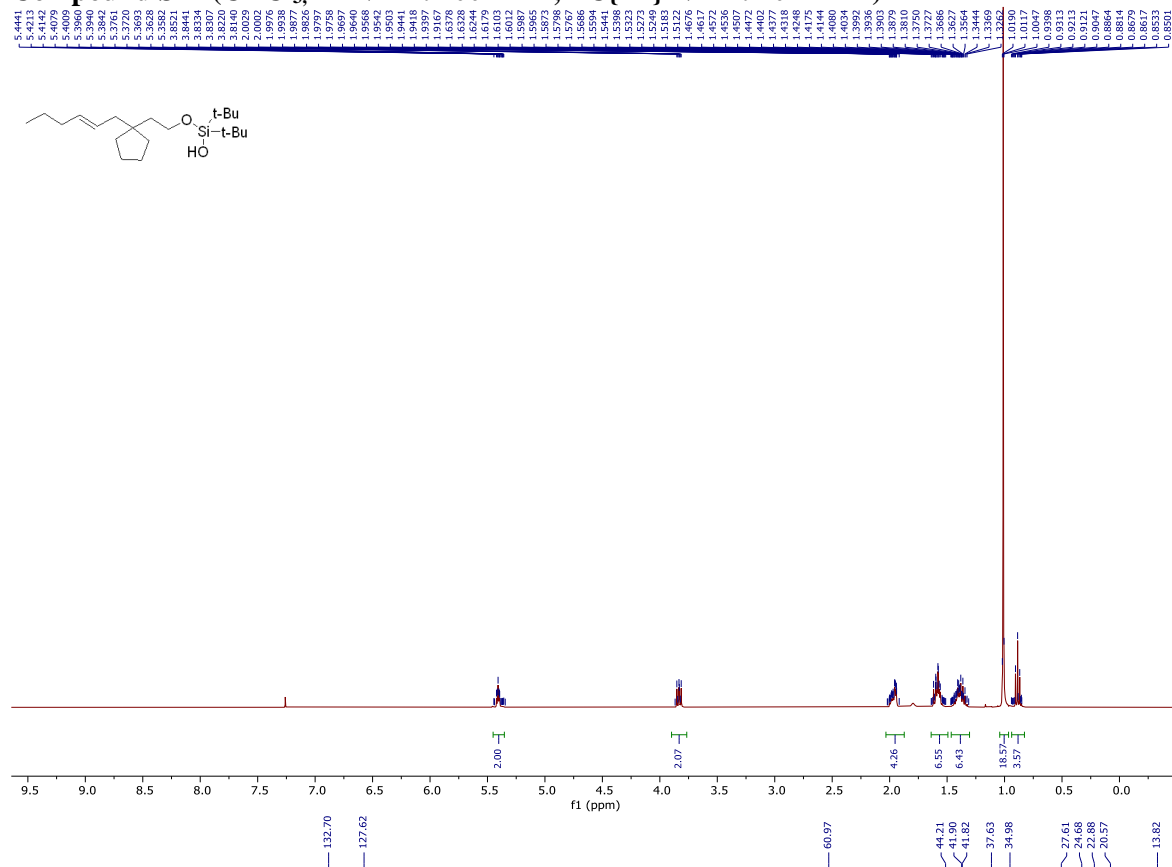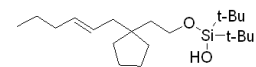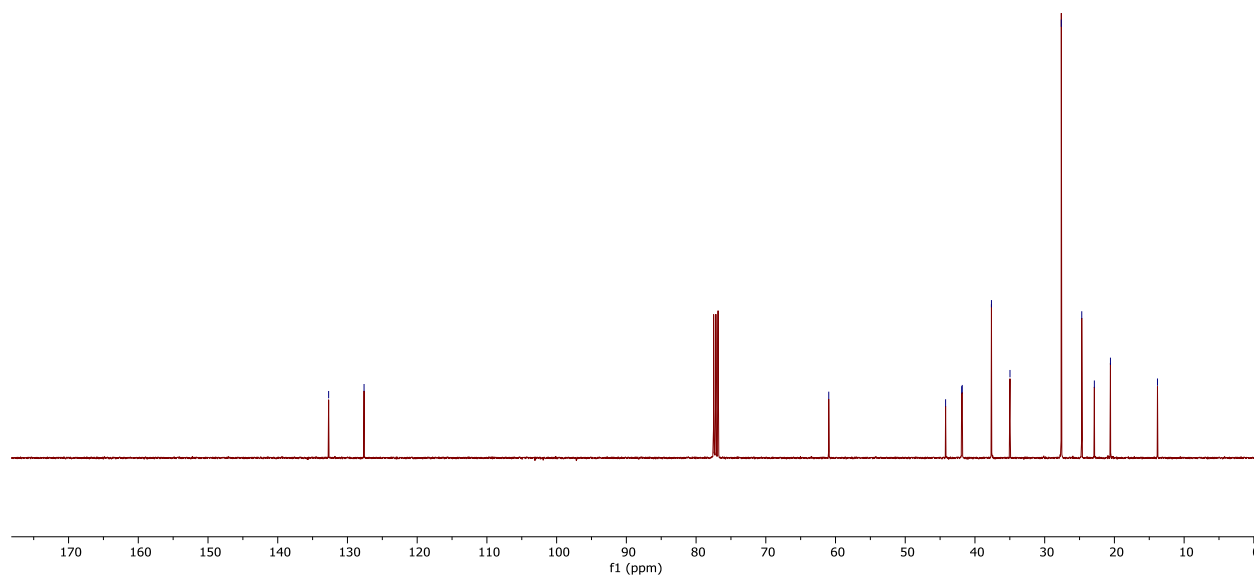

**Compound S73 (CDCl<sub>3</sub>, <sup>1</sup>H NMR: 400 MHz, <sup>13</sup>C{<sup>1</sup>H} NMR: 101 MHz)**

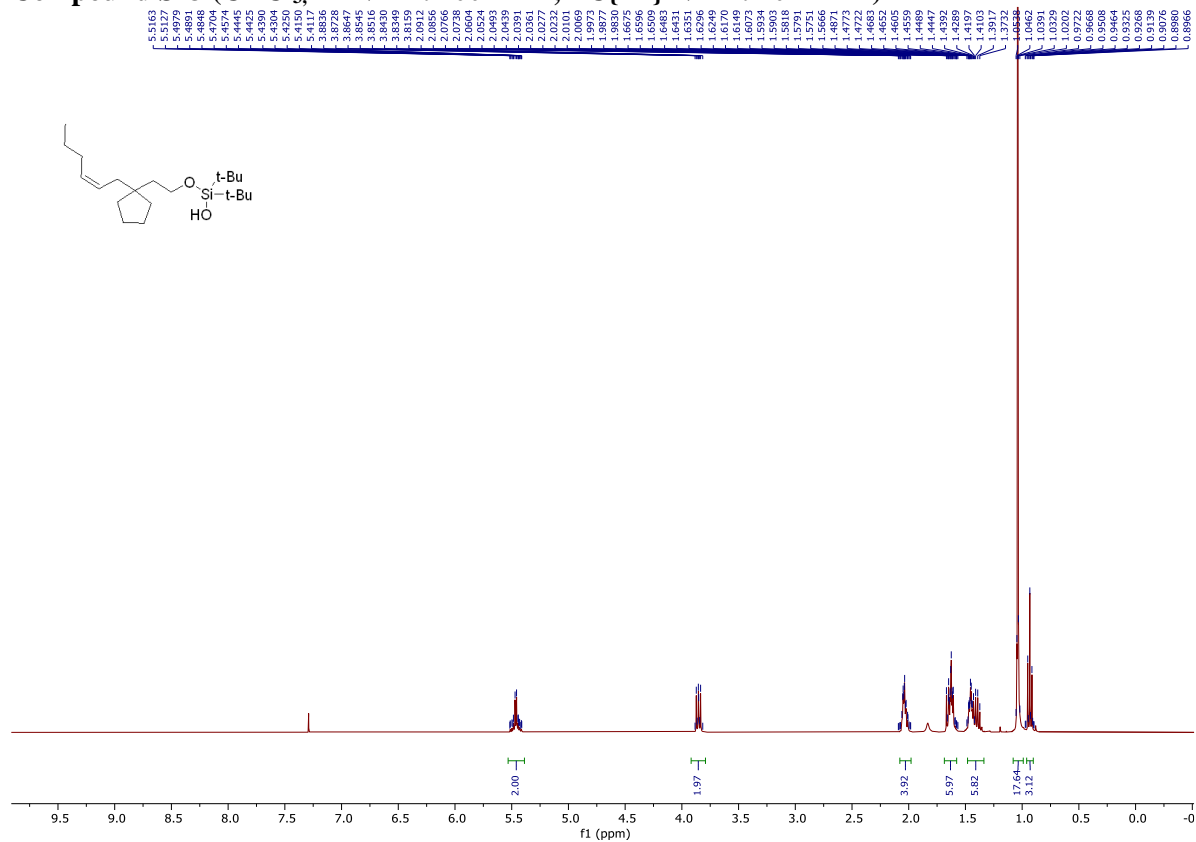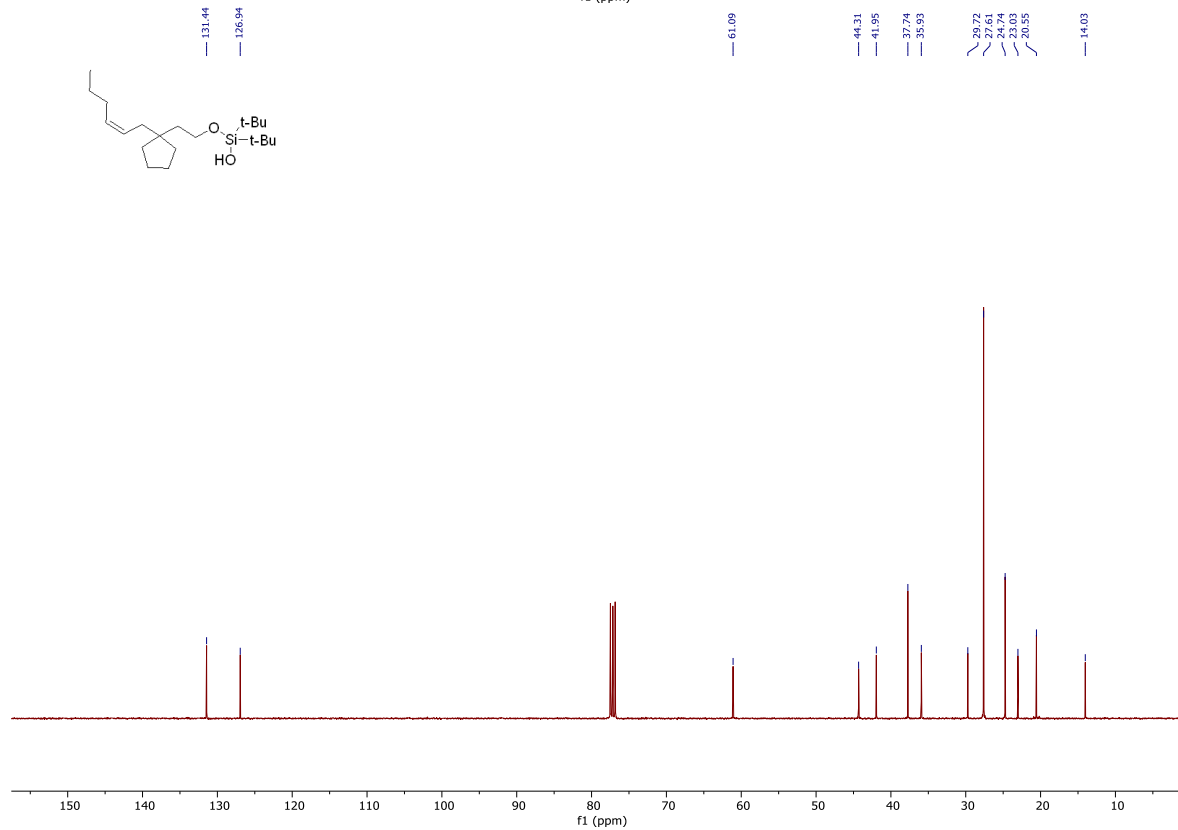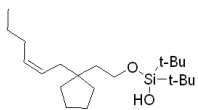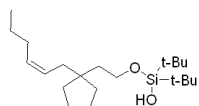



**Compound 1 (CDCl<sub>3</sub>, <sup>1</sup>H NMR: 400 MHz, <sup>13</sup>C{<sup>1</sup>H} NMR: 101 MHz)**

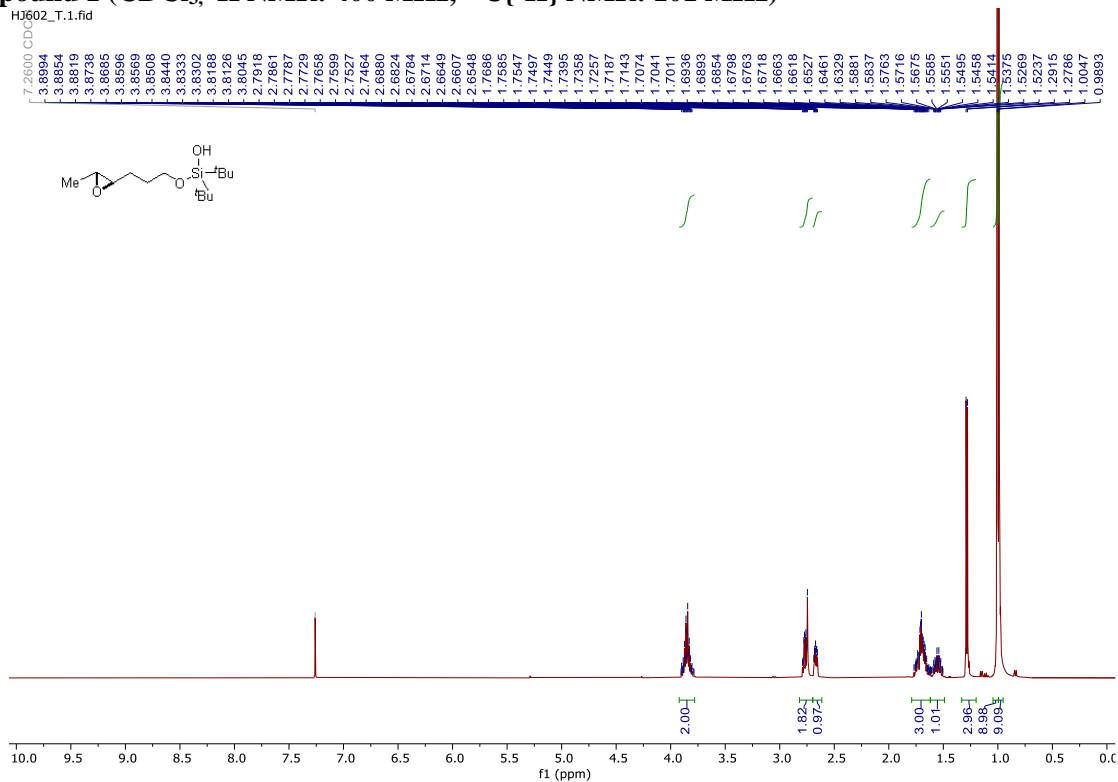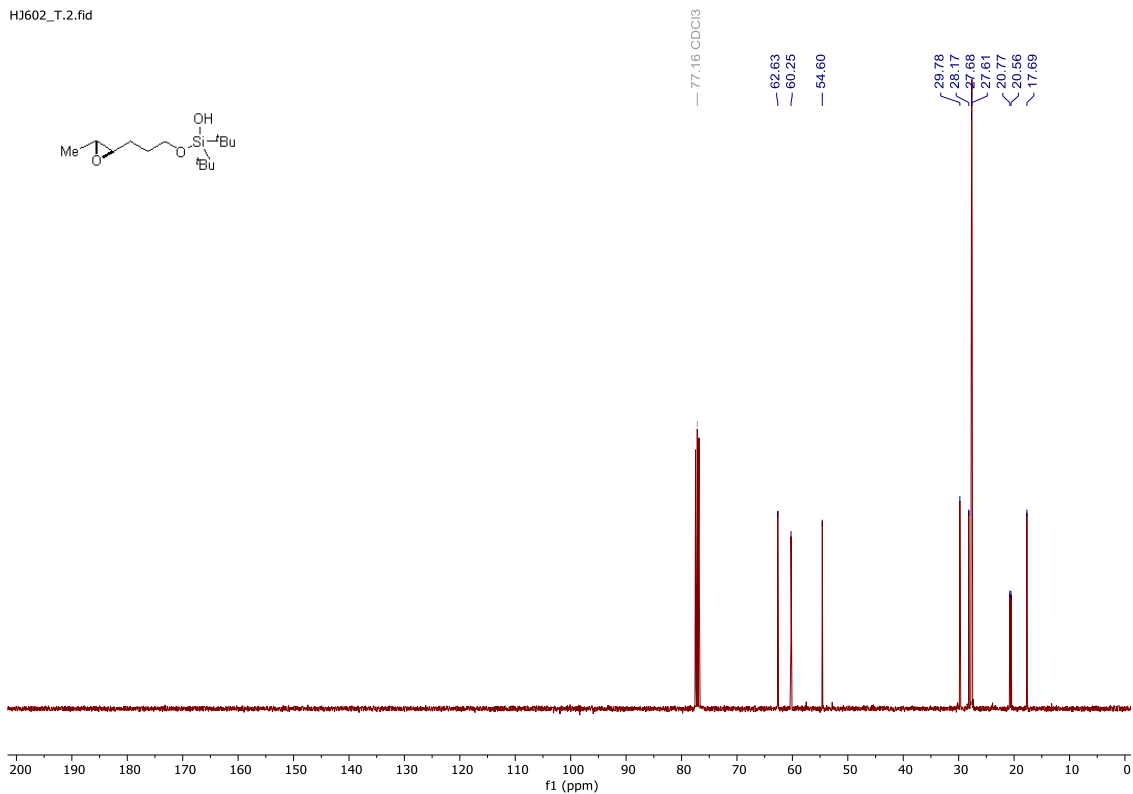

# Compound 2 (CDCl<sub>3</sub>, <sup>1</sup>H NMR: 400 MHz, <sup>13</sup>C{<sup>1</sup>H} NMR: 101 MHz)

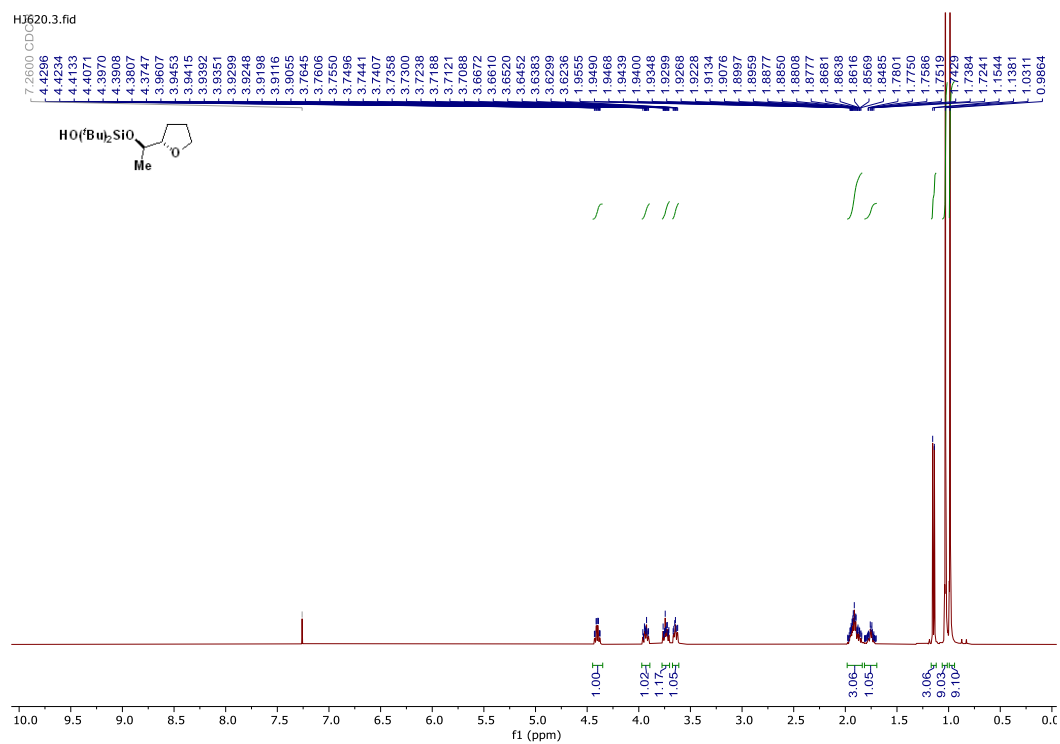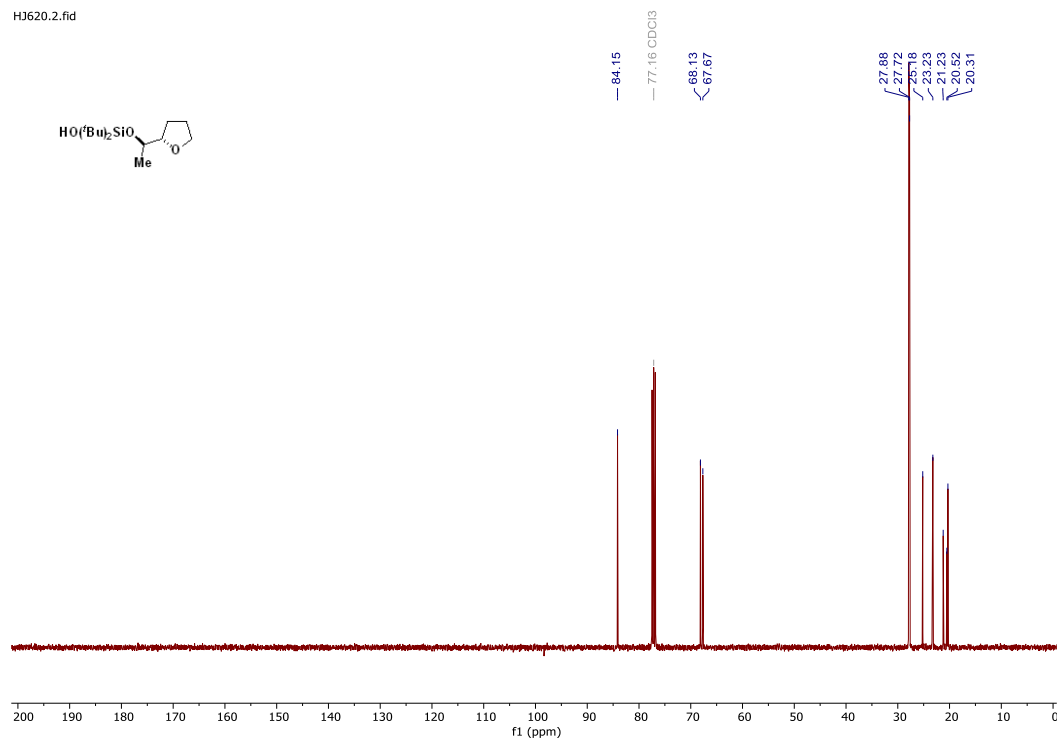

Compound 3 (CDCl<sub>3</sub>, <sup>1</sup>H NMR: 400 MHz, <sup>13</sup>C{<sup>1</sup>H} NMR: 101 MHz)

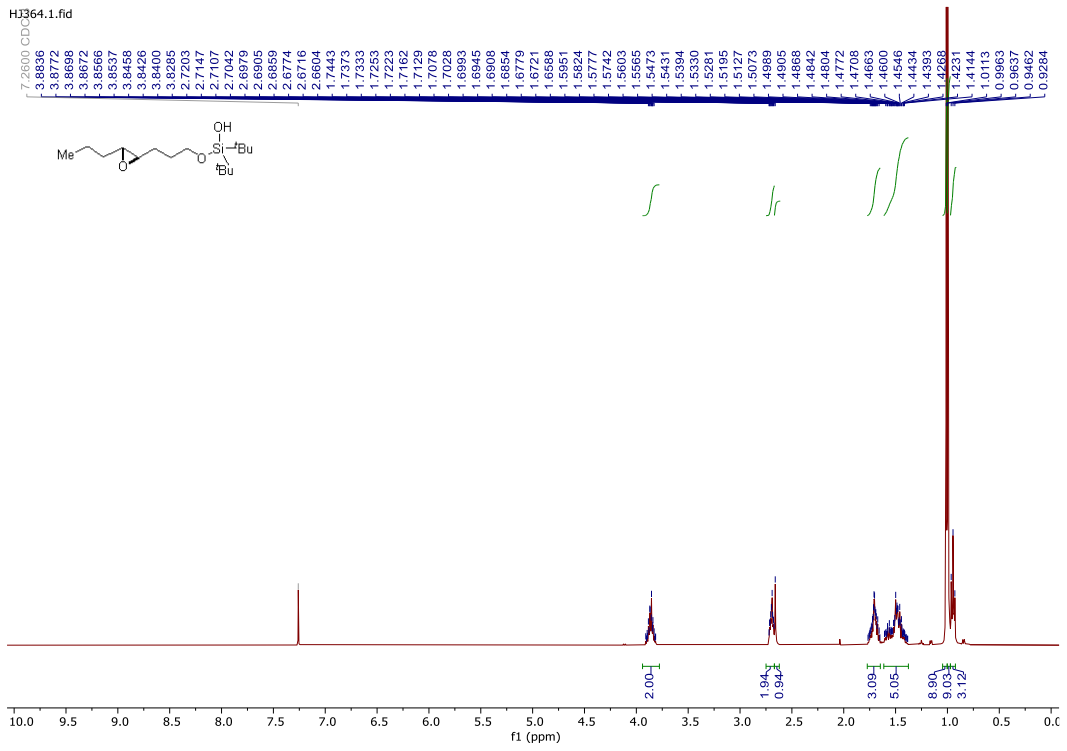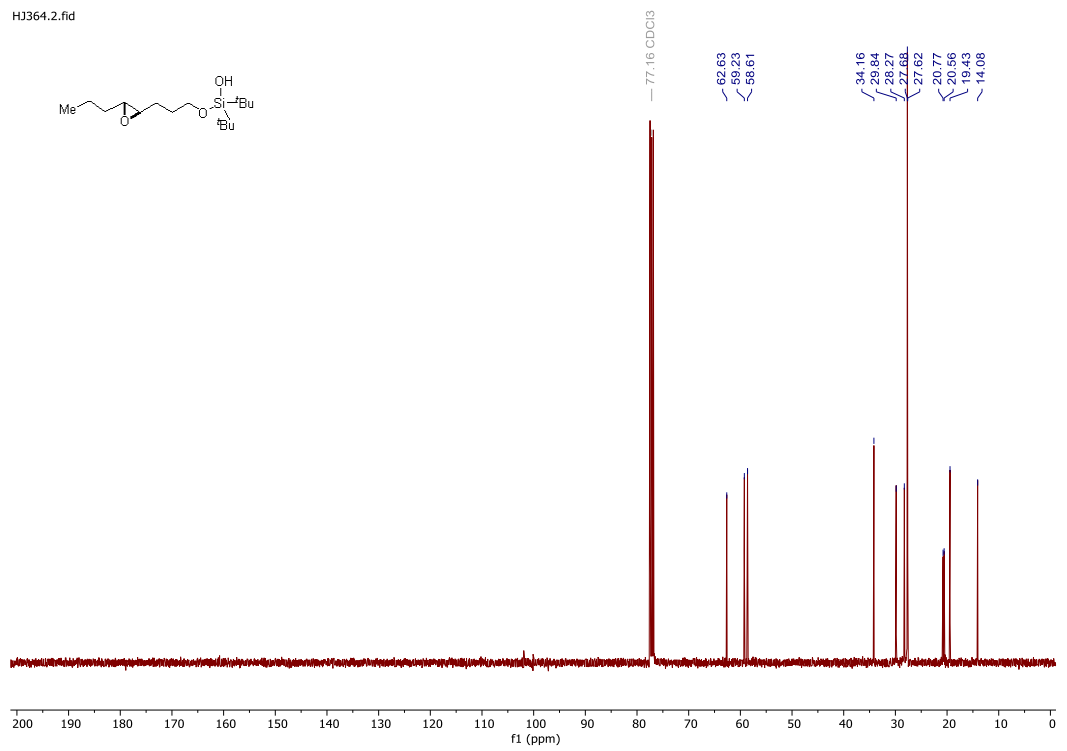

**Compound 4 (CDCl<sub>3</sub>, <sup>1</sup>H NMR: 400 MHz, <sup>13</sup>C{<sup>1</sup>H} NMR: 101 MHz)**

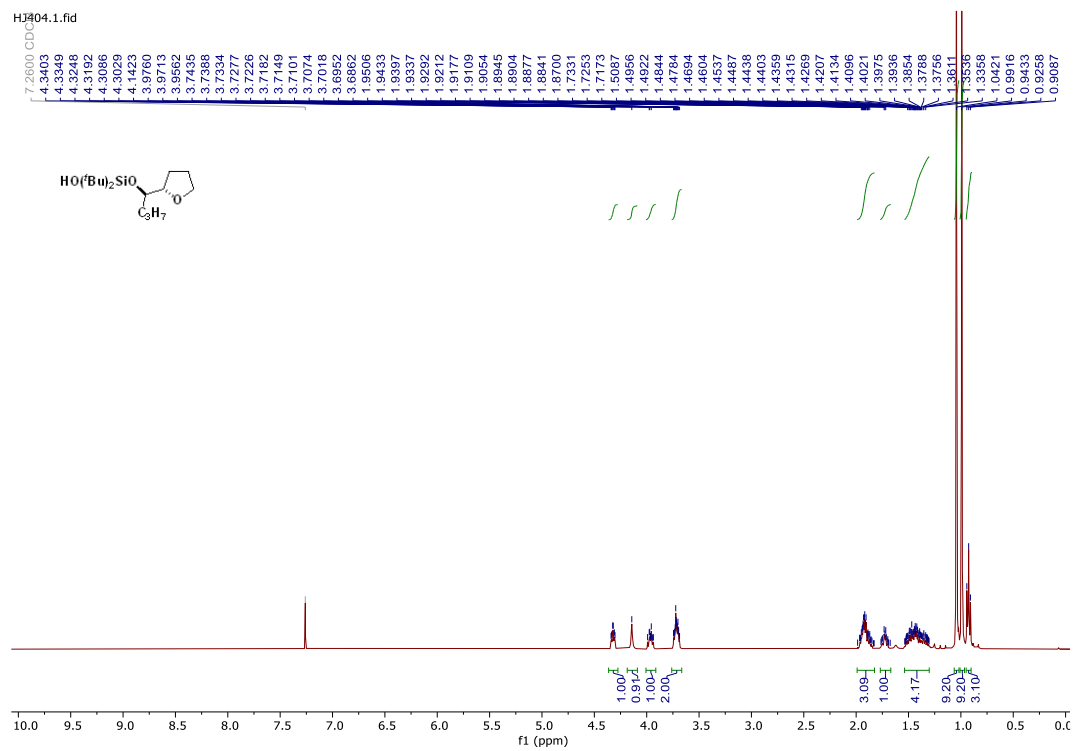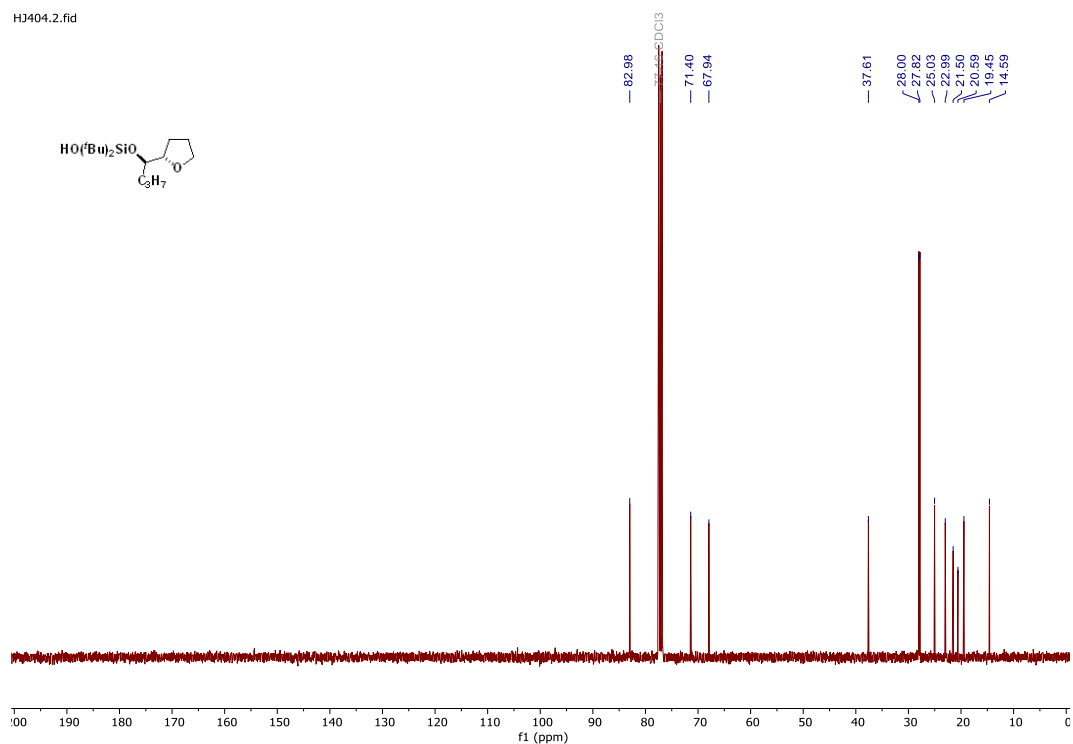

**Compound 5 (CDCl<sub>3</sub>, <sup>1</sup>H NMR: 400 MHz, <sup>13</sup>C{<sup>1</sup>H} NMR: 101 MHz)**

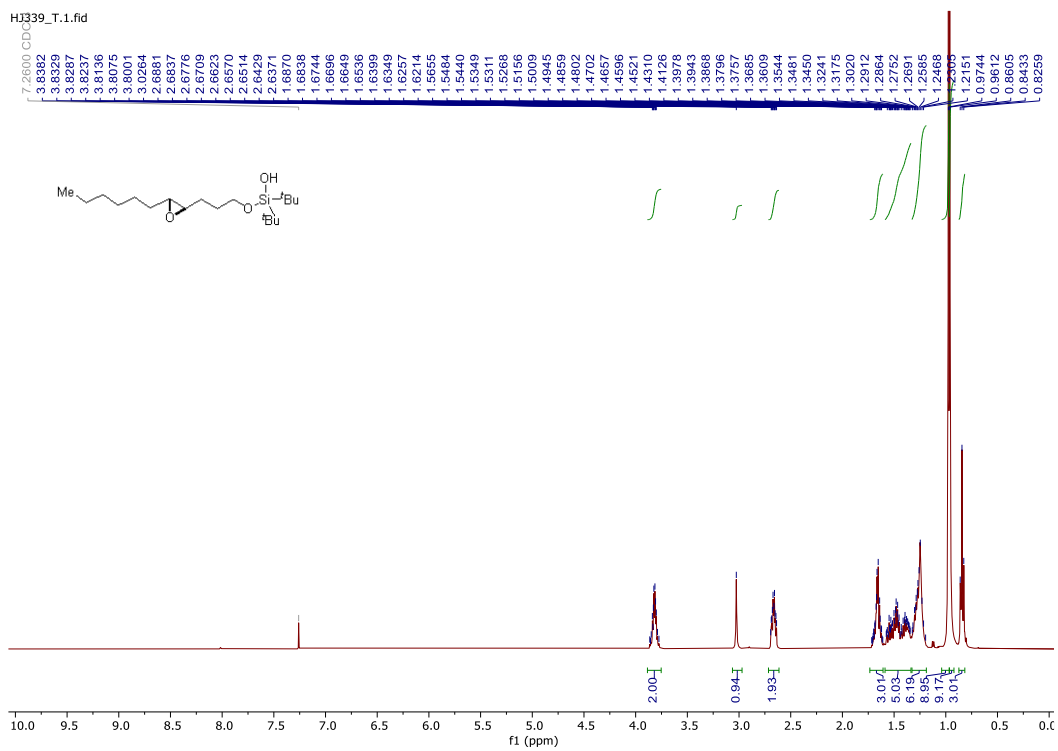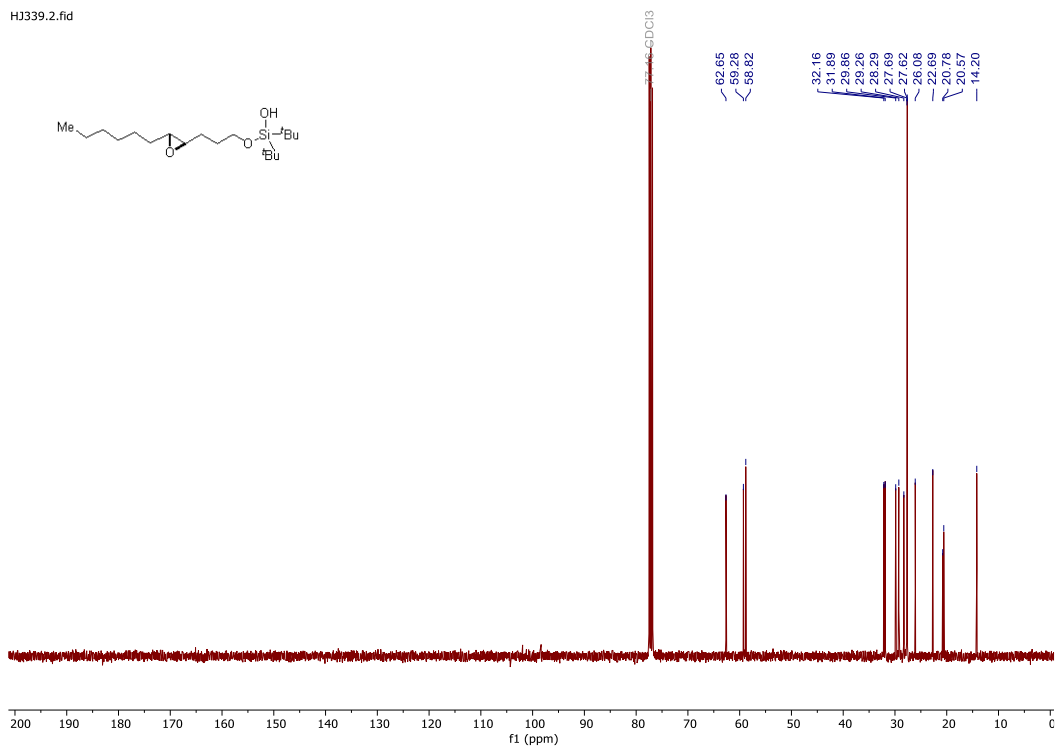

**Compound 6 (CDCl<sub>3</sub>, <sup>1</sup>H NMR: 400 MHz, <sup>13</sup>C{<sup>1</sup>H} NMR: 101 MHz)**

HJ346.1.fid

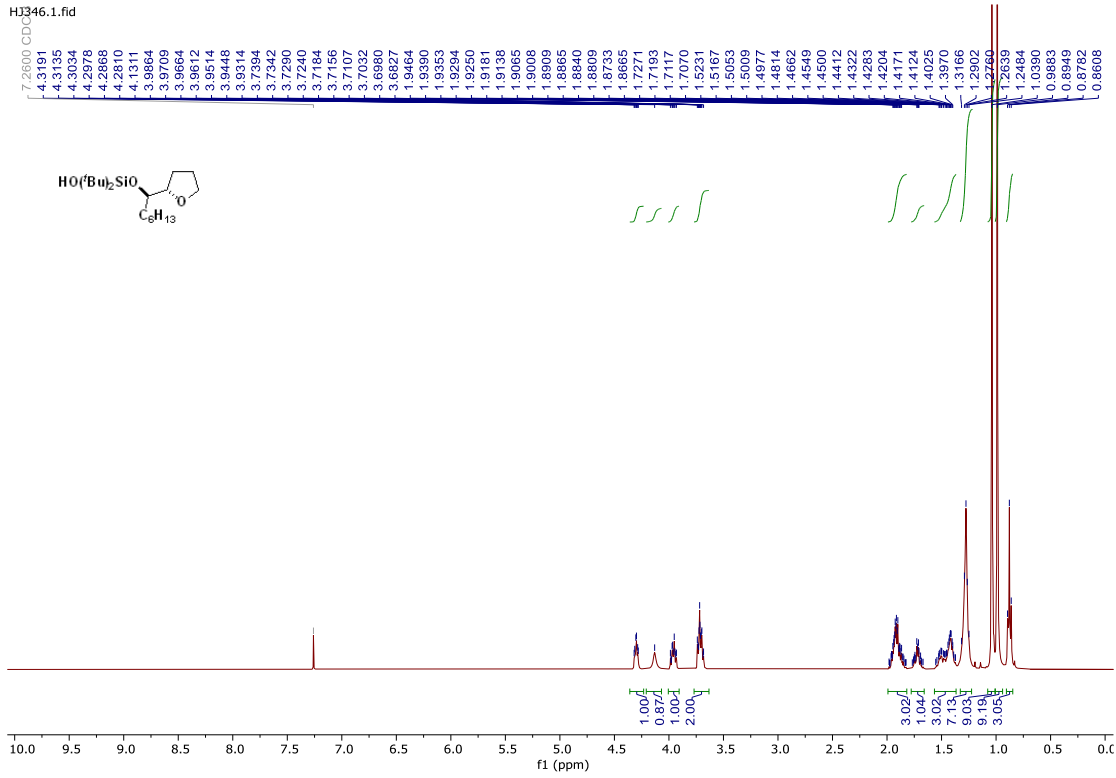

HJ346.2.fid

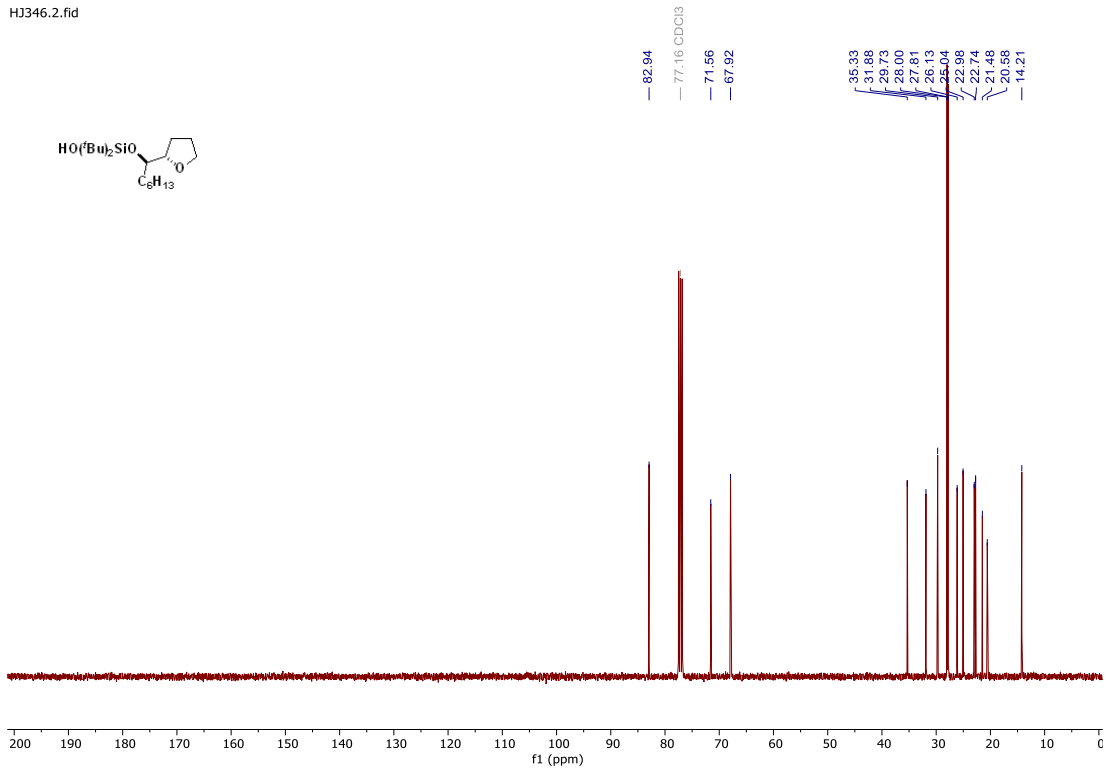

**Compound 7 (CDCl<sub>3</sub>, <sup>1</sup>H NMR: 400 MHz, <sup>13</sup>C{<sup>1</sup>H} NMR: 101 MHz)**

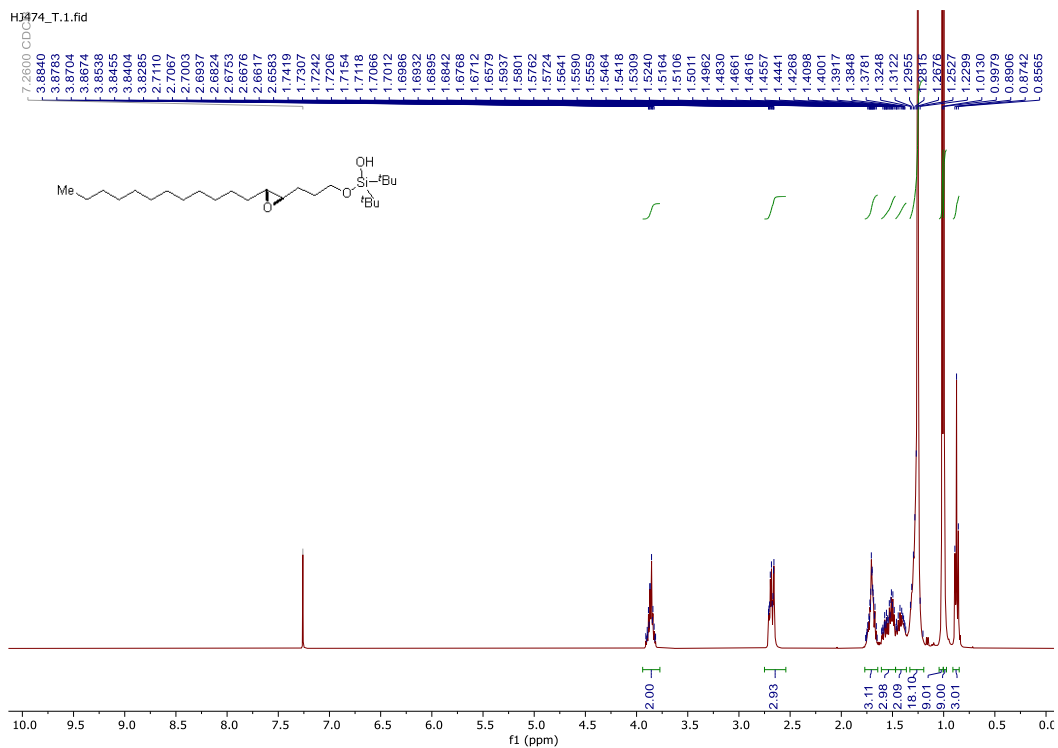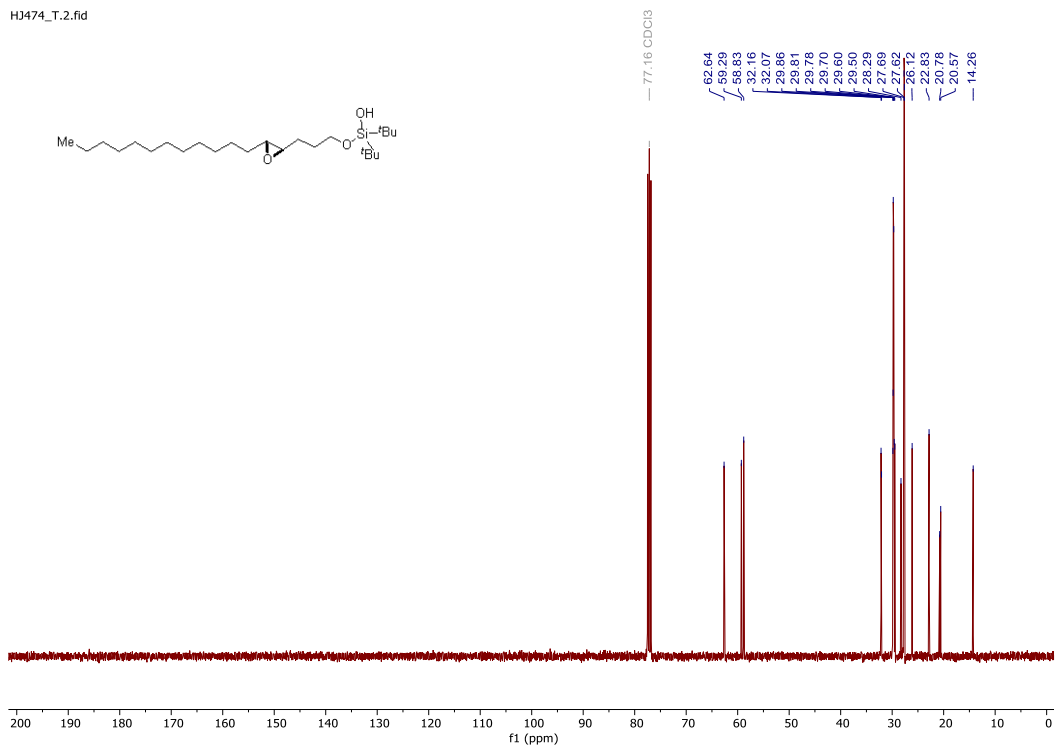

**Compound 8 (CDCl<sub>3</sub>, <sup>1</sup>H NMR: 400 MHz, <sup>13</sup>C{<sup>1</sup>H} NMR: 101 MHz)**

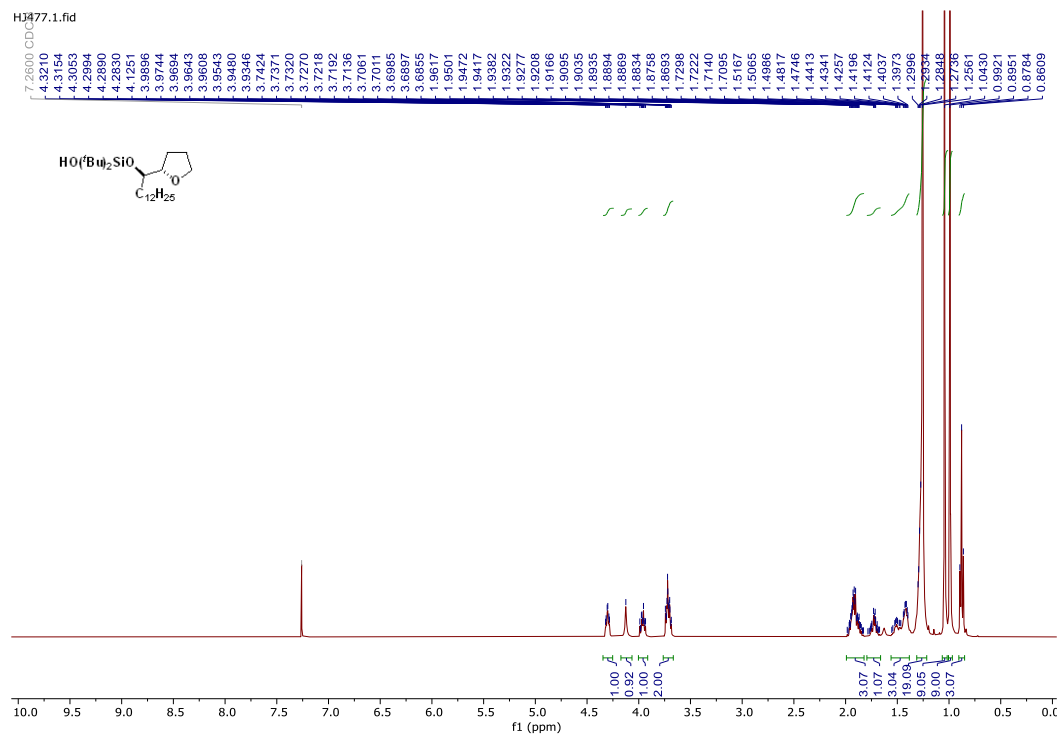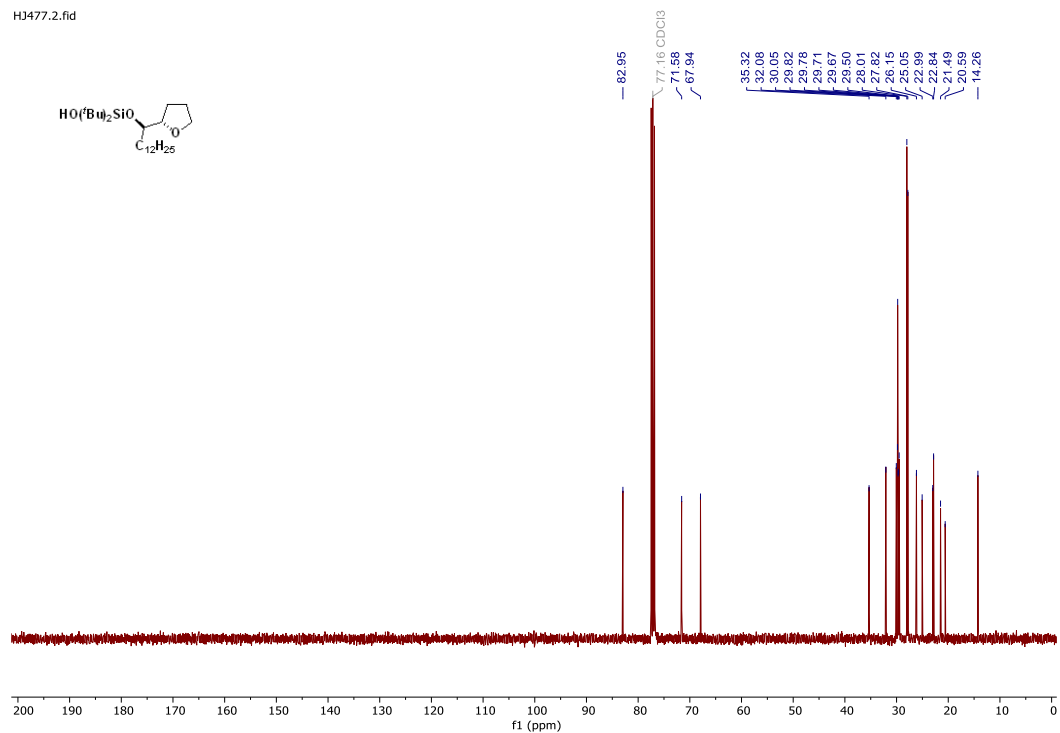



**Compound 9 (CDCl<sub>3</sub>, <sup>1</sup>H NMR: 400 MHz, <sup>13</sup>C{<sup>1</sup>H} NMR: 101 MHz)**

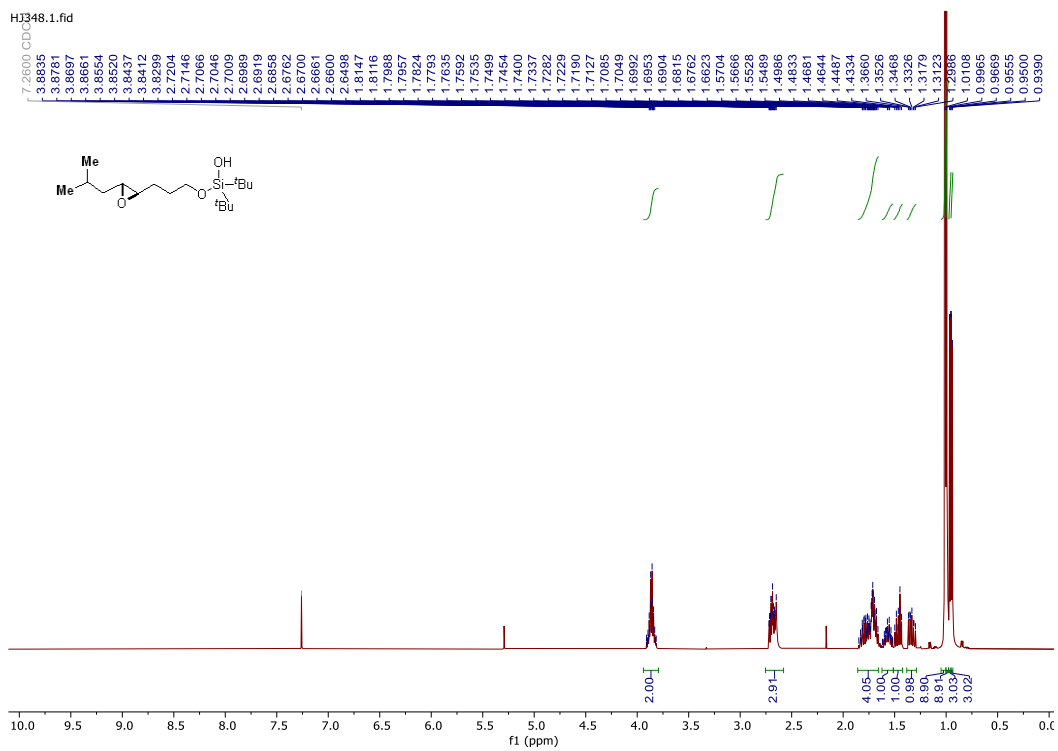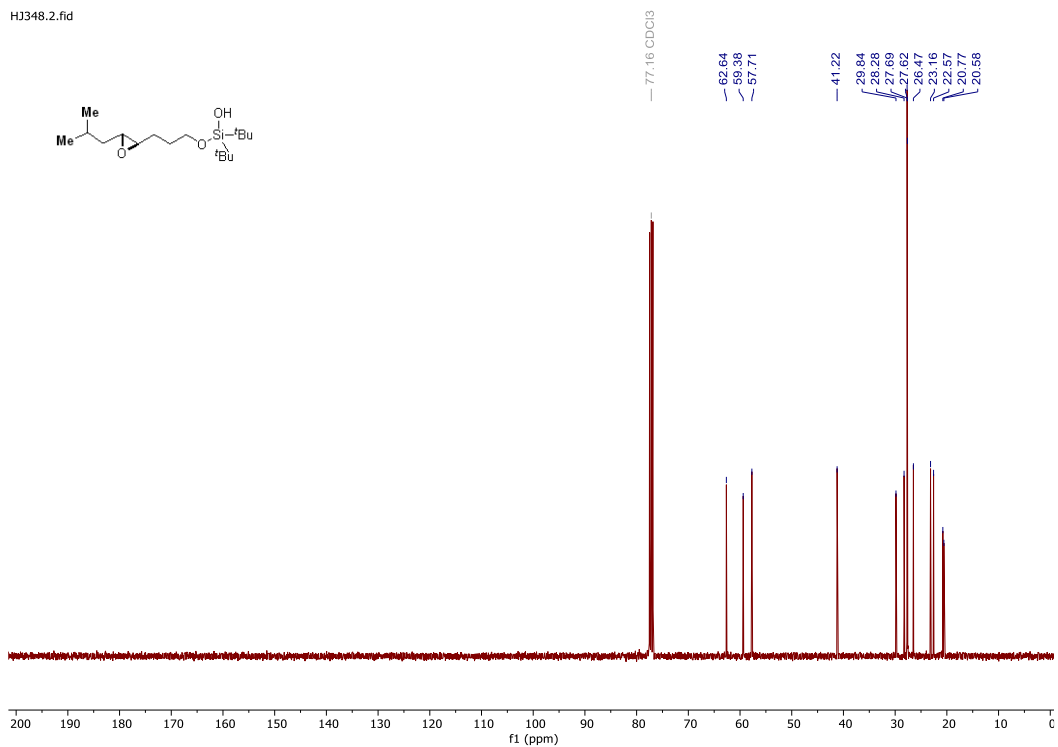

**Compound 10 (CDCl<sub>3</sub>, <sup>1</sup>H NMR: 400 MHz, <sup>13</sup>C{<sup>1</sup>H} NMR: 101 MHz)**

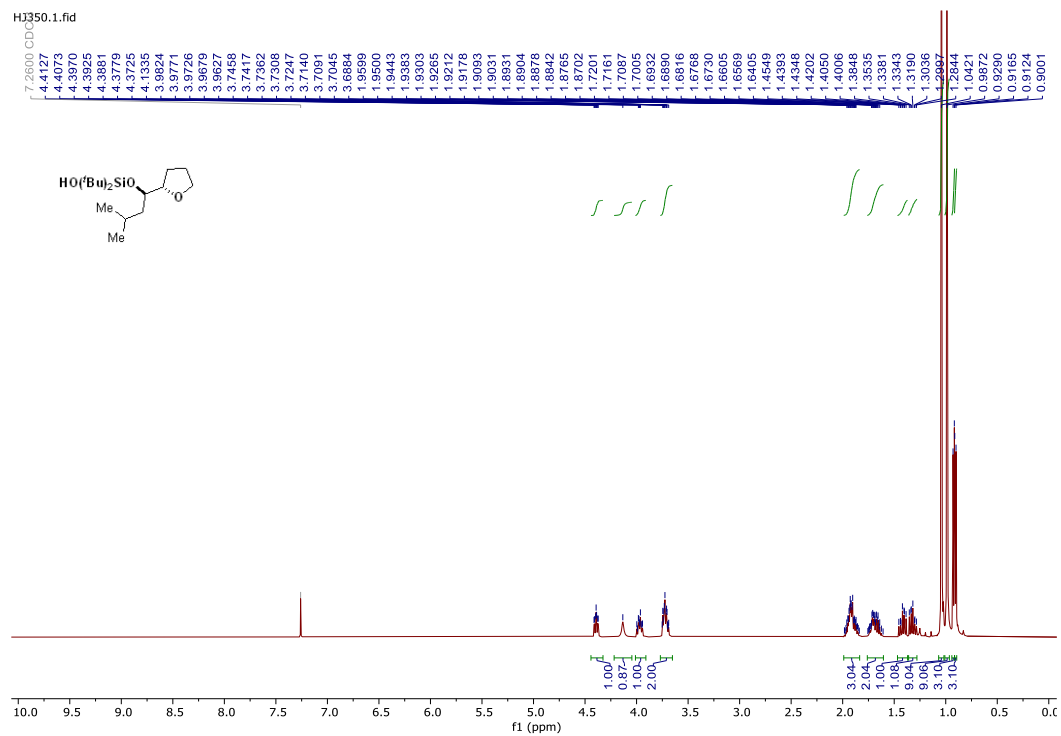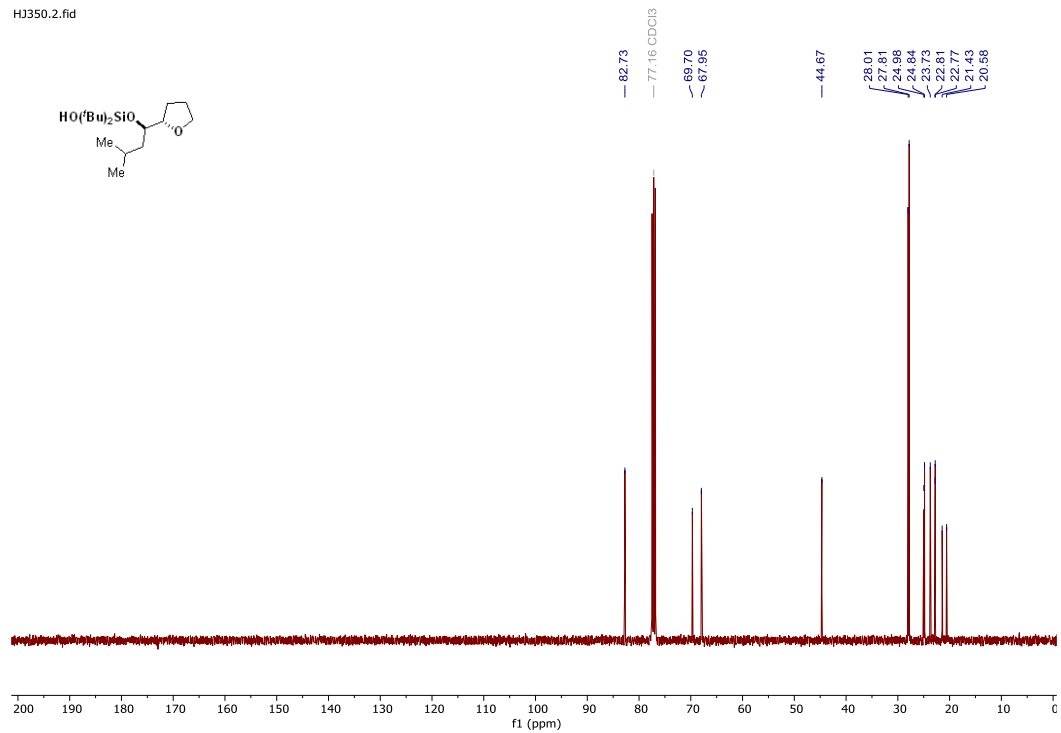

**Compound 11 (CDCl<sub>3</sub>, <sup>1</sup>H NMR: 400 MHz, <sup>13</sup>C{<sup>1</sup>H} NMR: 101 MHz)**

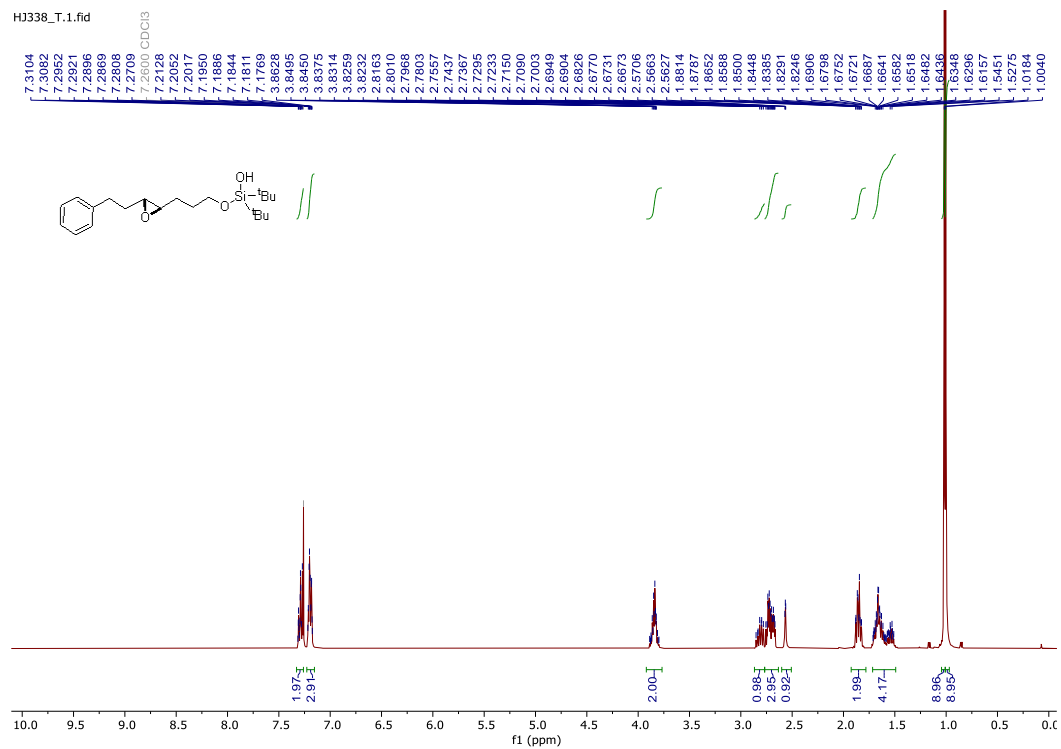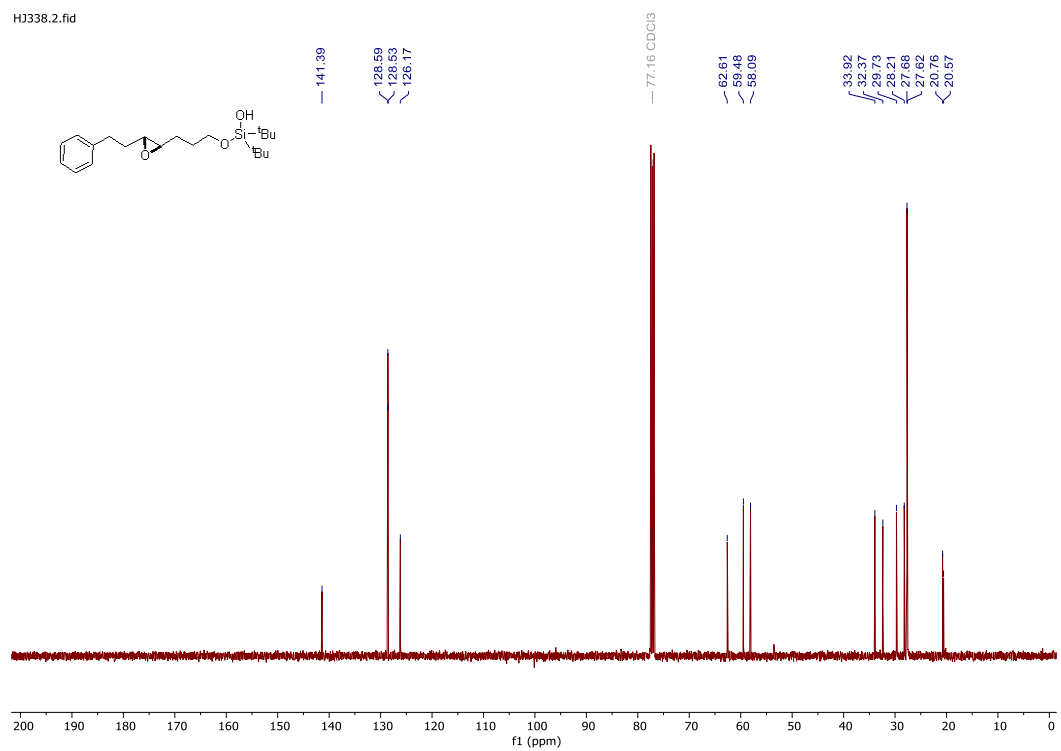

**Compound 12 (CDCl<sub>3</sub>, <sup>1</sup>H NMR: 400 MHz, <sup>13</sup>C{<sup>1</sup>H} NMR: 101 MHz)**

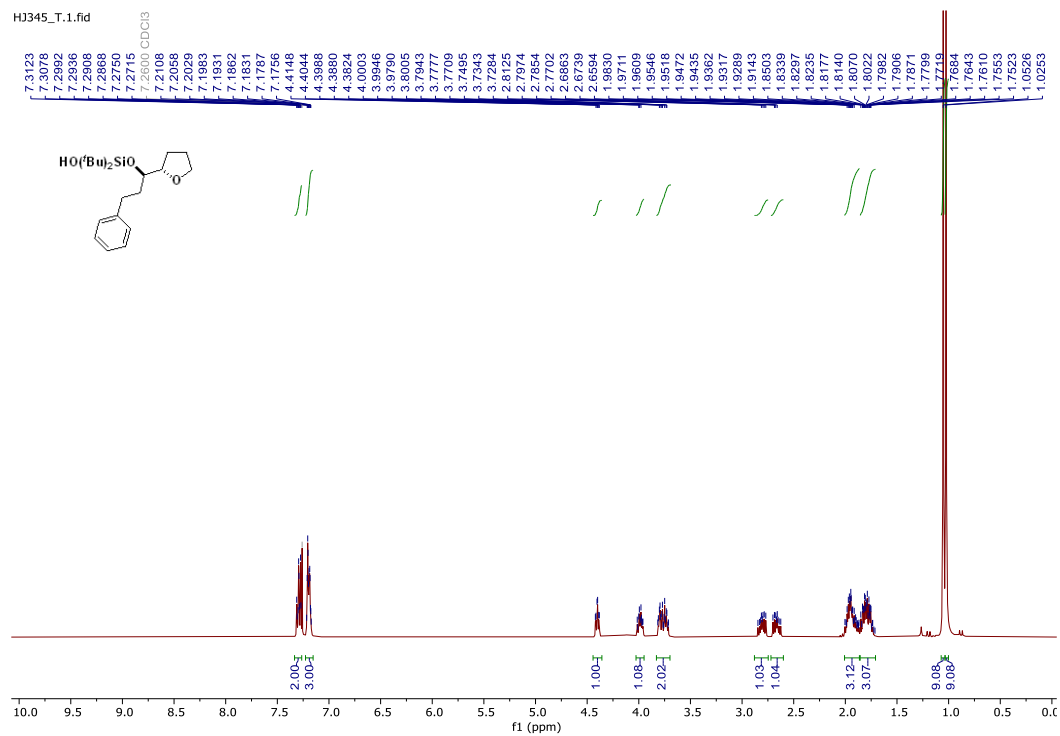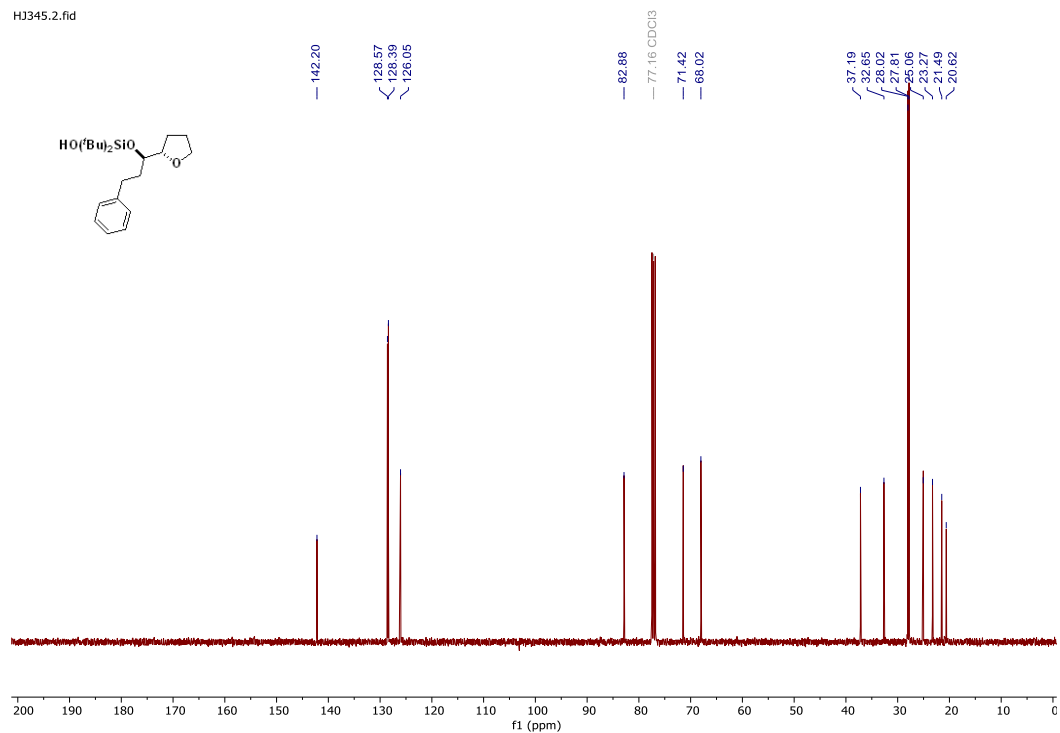

**Compound 13 (CDCl<sub>3</sub>, <sup>1</sup>H NMR: 400 MHz, <sup>13</sup>C{<sup>1</sup>H} NMR: 101 MHz)**

7.1703, 7.1631, 7.1495, 7.1411, 7.1336, 7.1159, 7.1120, 6.9935, 6.9894, 6.9701, 6.9640, 6.9581, 6.9474, 6.9344, 3.8824, 3.8655, 3.8648, 3.8571, 3.8433, 3.8397, 3.8344, 3.8262, 3.8087, 3.7977, 3.7940, 3.7928, 2.7937, 2.7786, 2.7655, 2.7249, 1.8814, 1.8766, 1.8619, 1.8467, 1.8407, 1.8265, 1.8196, 1.8140, 1.7977, 1.8035, 1.7942, 1.7883, 1.7743, 1.7531, 1.7531, 1.7366, 1.7205, 1.7058, 1.7023, 1.7015, 1.6986, 1.6948, 1.6913, 1.6781, 1.6710, 1.6649, 1.6511, 1.6489, 1.6435, 1.6353, 1.6297, 1.6265, 1.6164, 1.6094, 1.6020, 1.5968, 1.5927, 1.5877, 1.5769, 1.5673, 1.5595, 1.5520, 1.5420, 1.5375, 1.5249, 1.5111, 1.5111, 1.5082, 1.5082, 1.0196, 1.0123, 0.9983, 0.9910, 0.9771

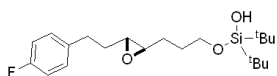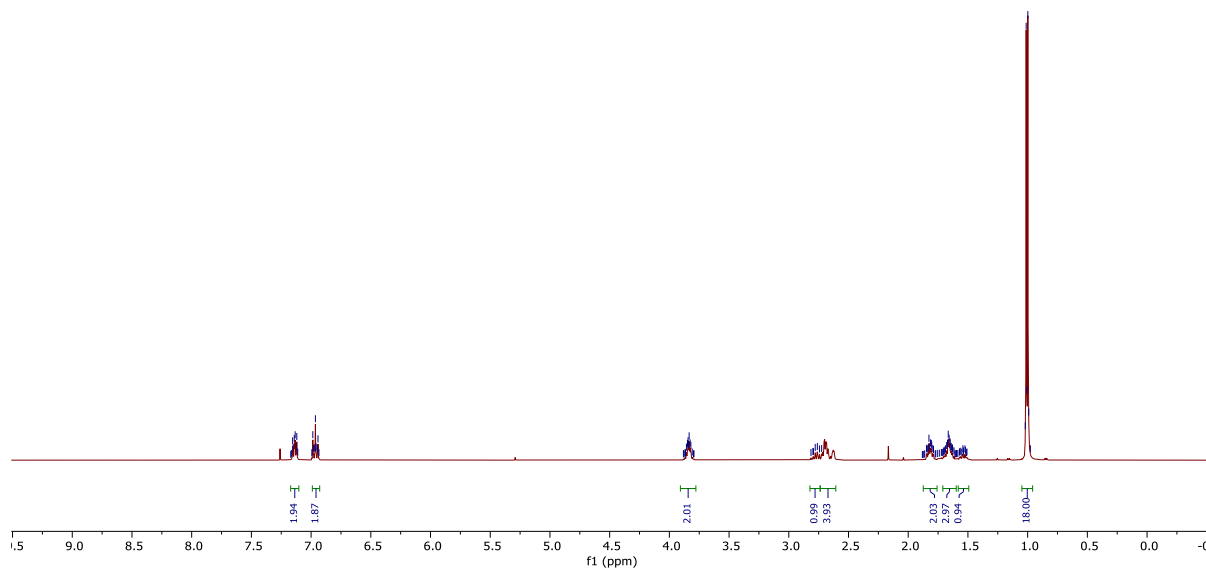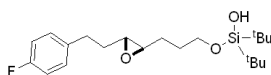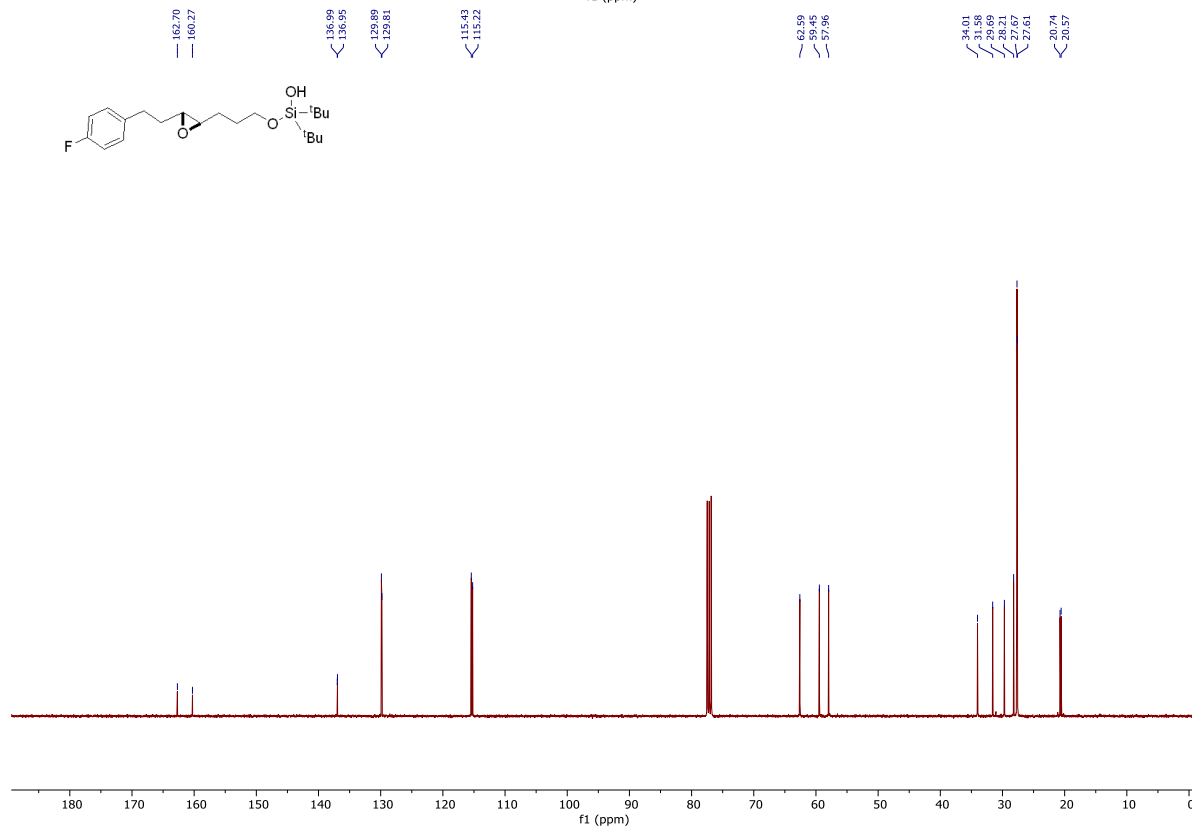

**Compound 14 (CDCl<sub>3</sub>, <sup>1</sup>H NMR: 400 MHz, <sup>13</sup>C{<sup>1</sup>H} NMR: 101 MHz)**

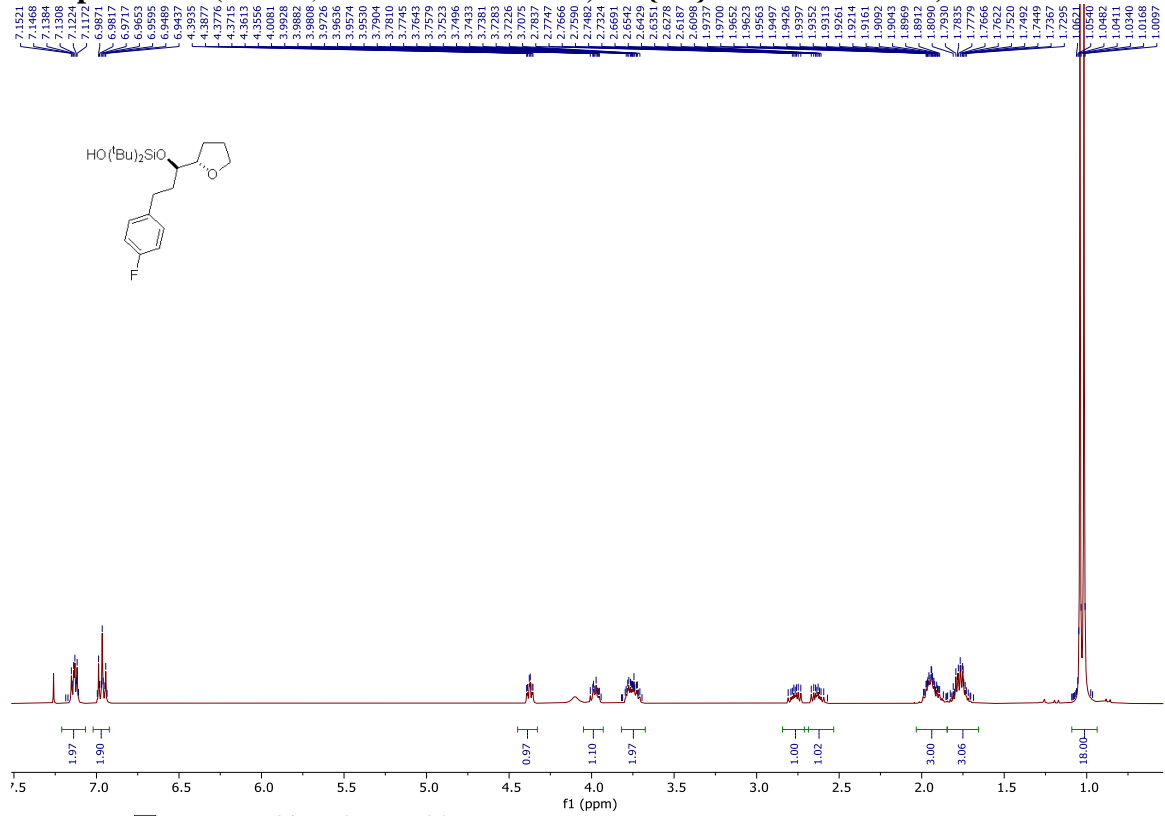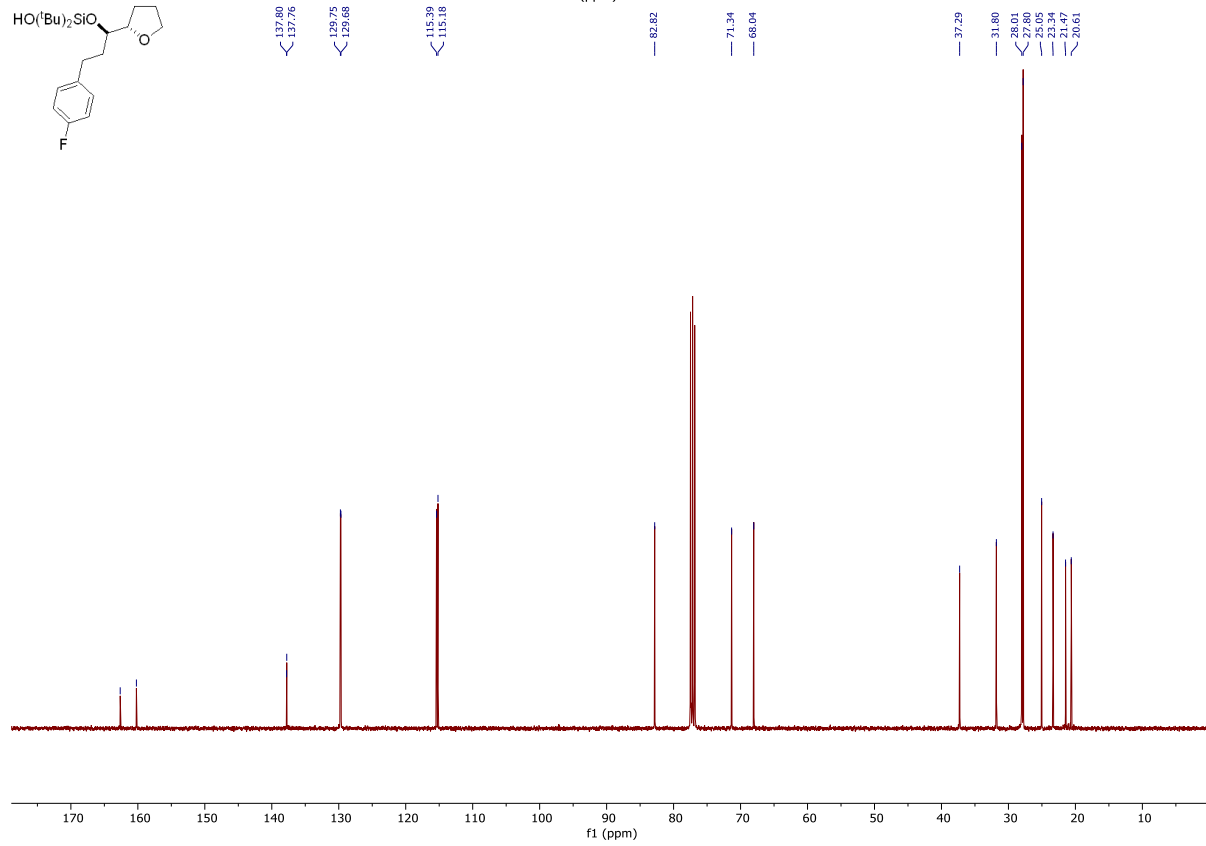

Compound 15 (CDCl<sub>3</sub>, <sup>1</sup>H NMR: 400 MHz, <sup>13</sup>C{<sup>1</sup>H} NMR: 101 MHz)

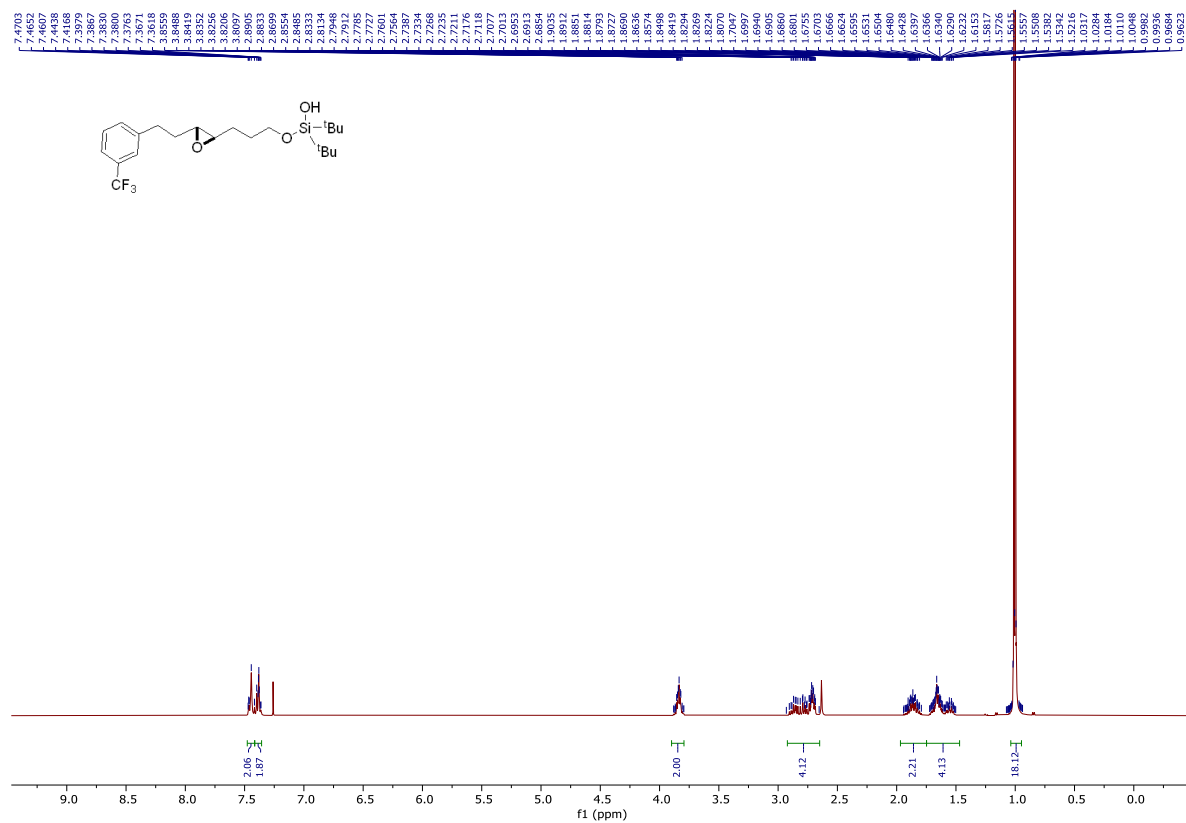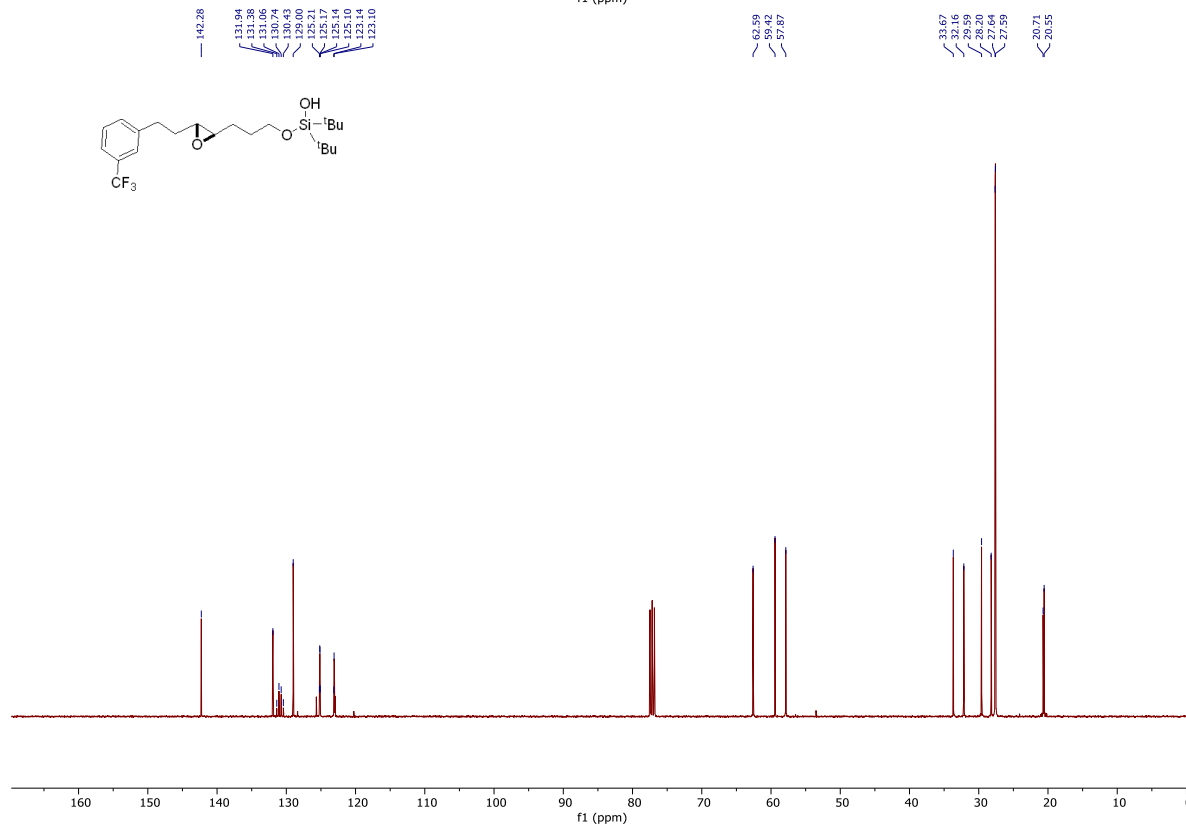

**Compound 16 (CDCl<sub>3</sub>, <sup>1</sup>H NMR: 400 MHz, <sup>13</sup>C{<sup>1</sup>H} NMR: 101 MHz)**

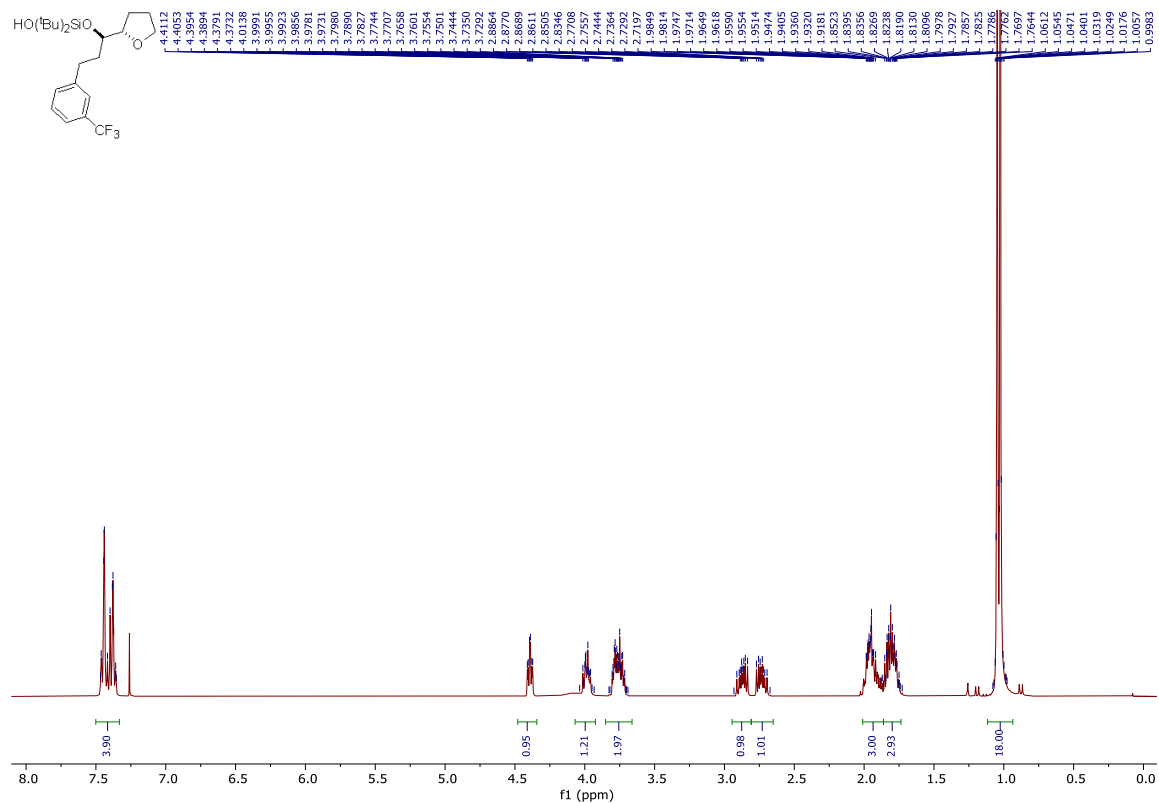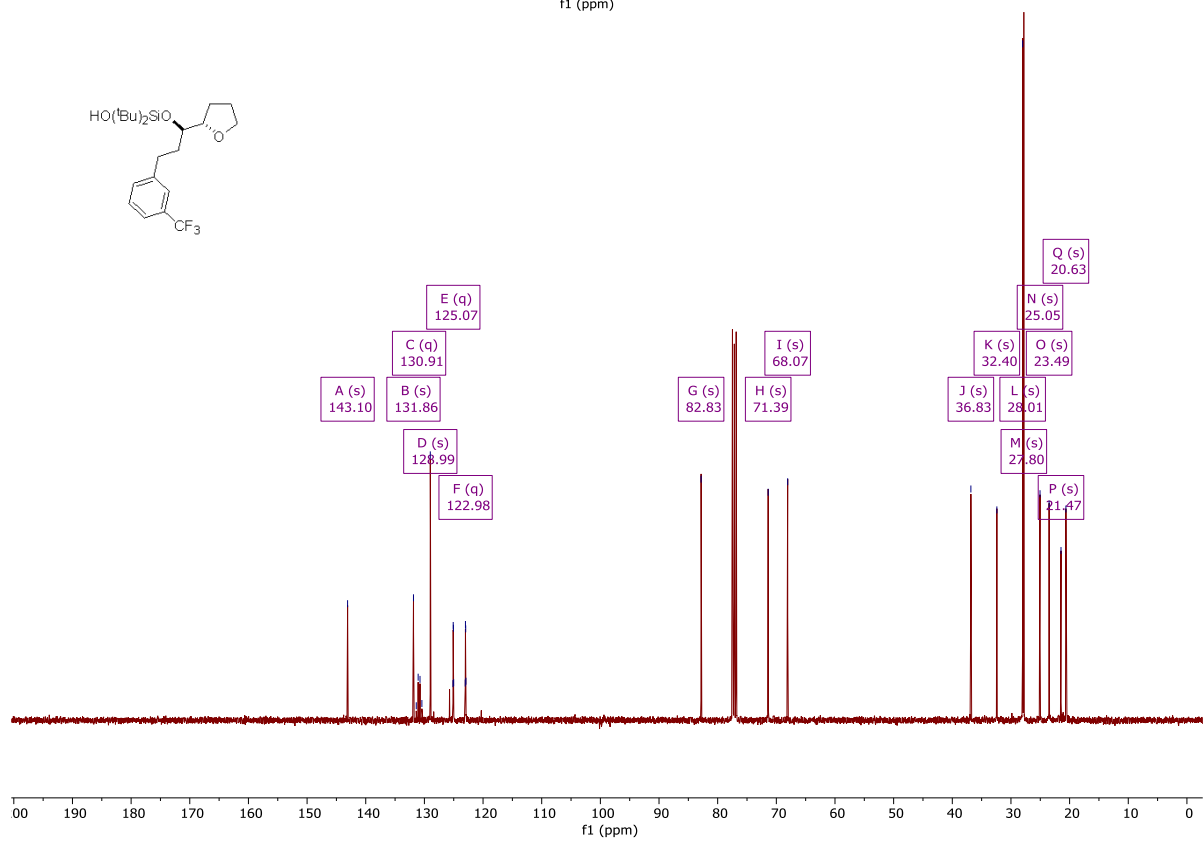



# Compound 17 (CDCl<sub>3</sub>, <sup>1</sup>H NMR: 400 MHz, <sup>13</sup>C{<sup>1</sup>H} NMR: 101 MHz)

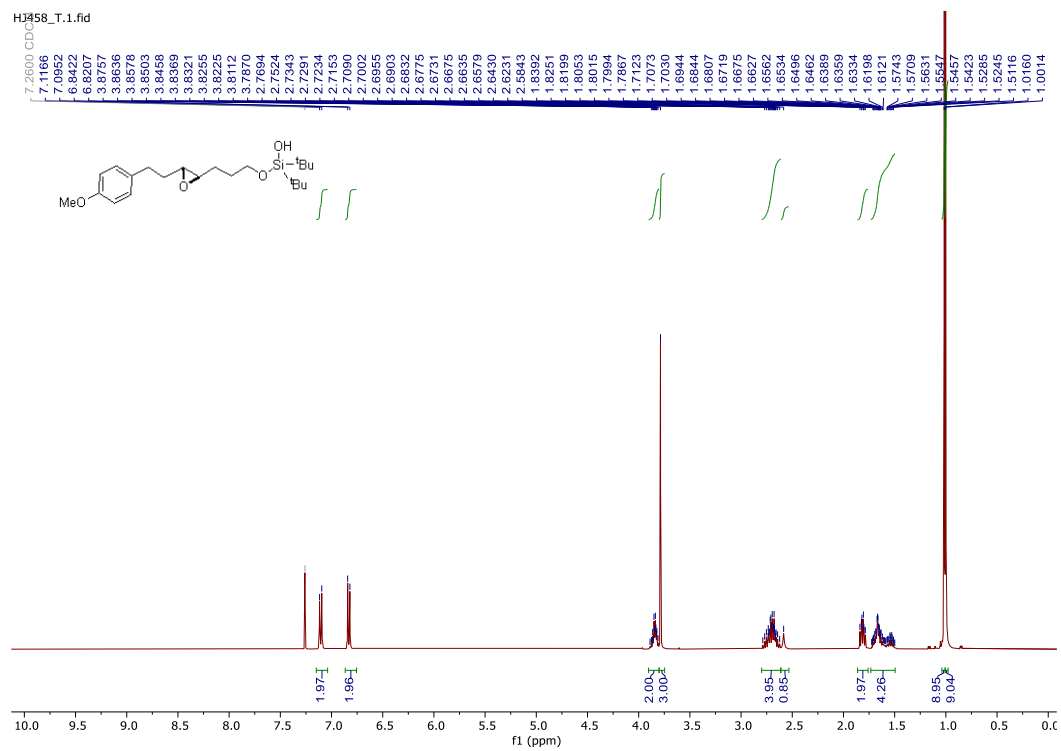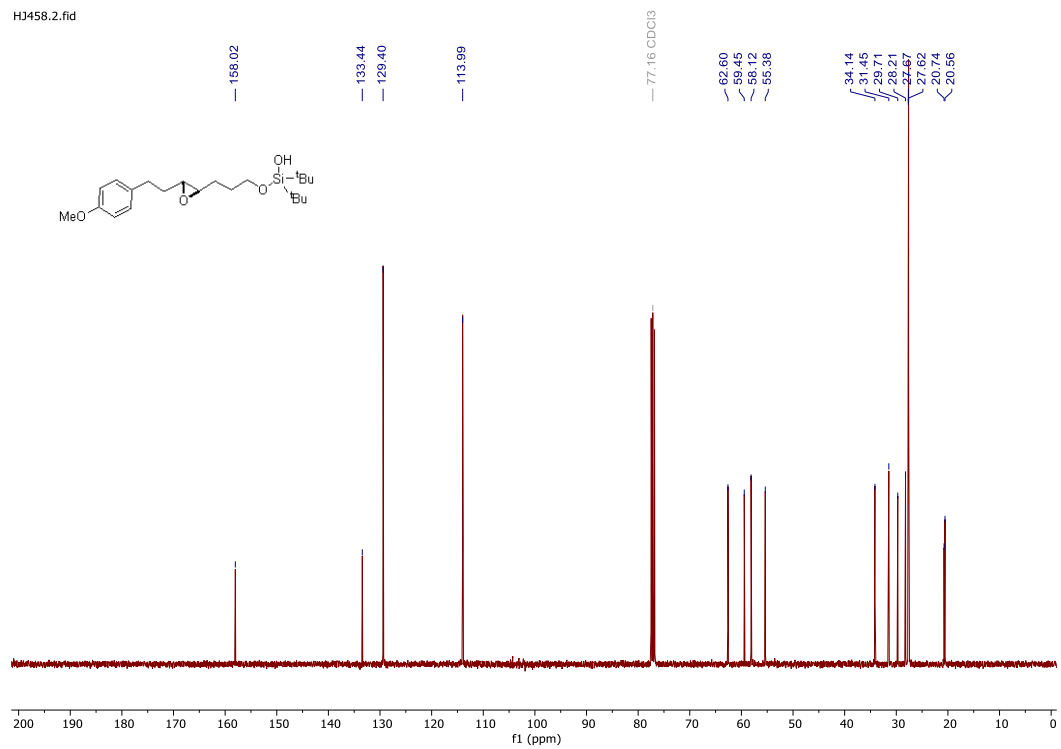

# Compound 18 (CDCl<sub>3</sub>, <sup>1</sup>H NMR: 400 MHz, <sup>13</sup>C{<sup>1</sup>H} NMR: 101 MHz)

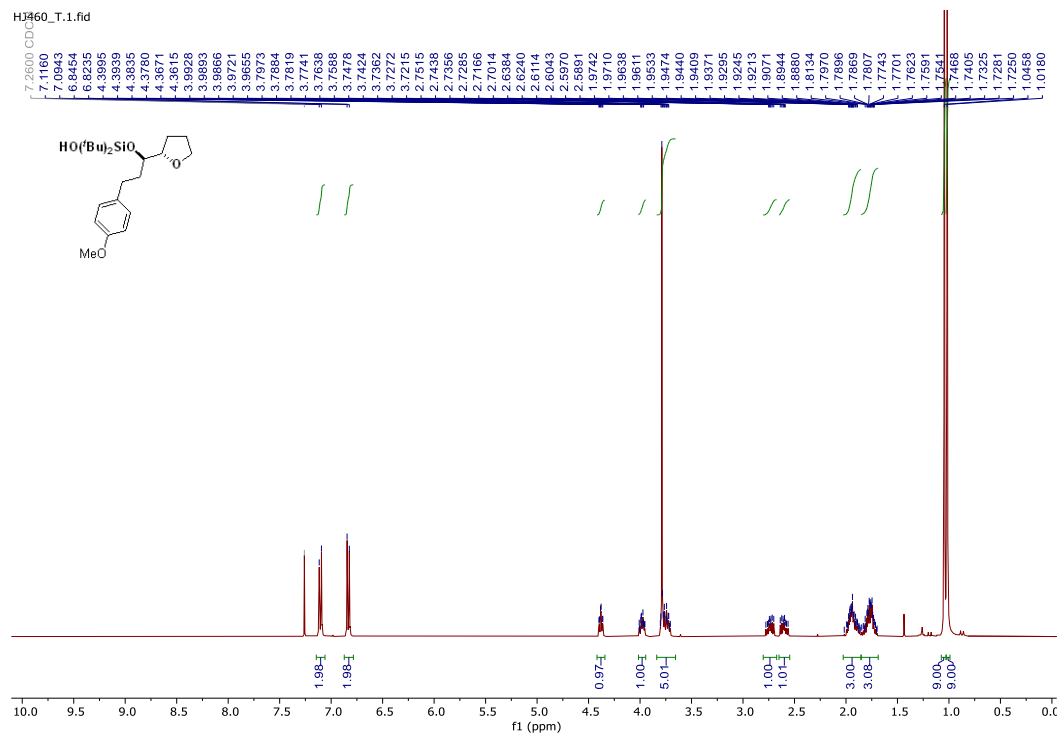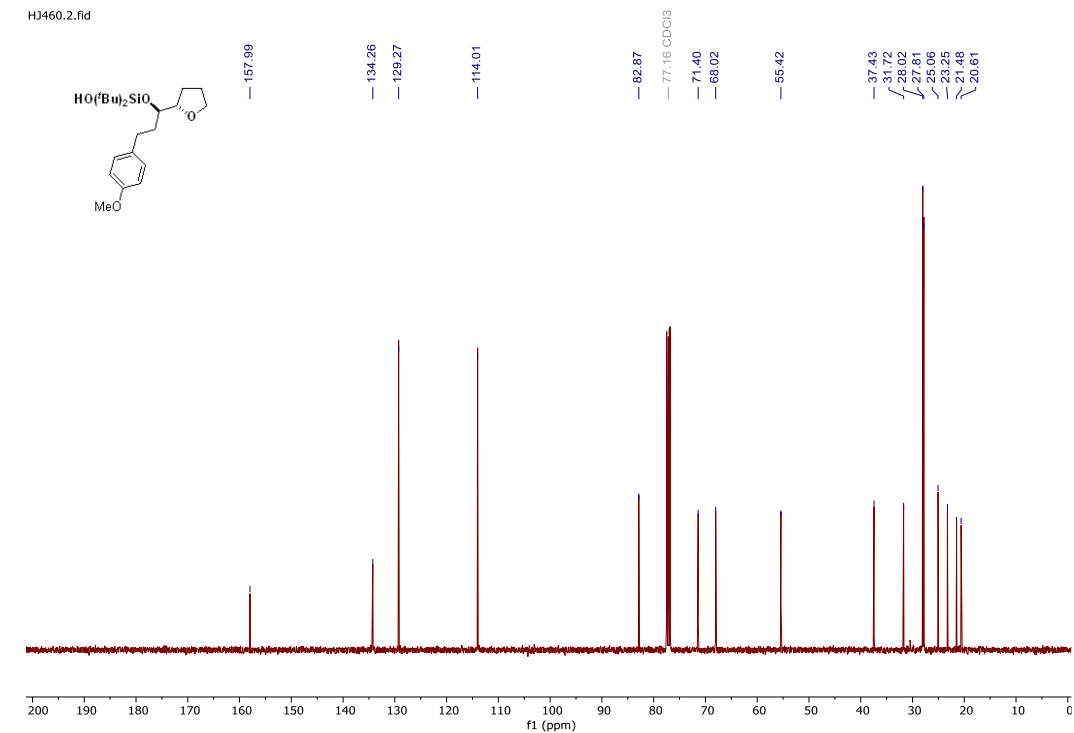

**Compound 19 (CDCl<sub>3</sub>, <sup>1</sup>H NMR: 400 MHz, <sup>13</sup>C{<sup>1</sup>H} NMR: 101 MHz)**

6.7287  
6.7090  
6.7052  
6.6795  
6.6579  
6.6490  
6.6205  
6.6161  
5.9074  
3.8622  
3.8396  
3.8331  
3.8173  
3.7917  
2.7526  
2.7347  
2.7193  
2.7144  
2.7002  
2.6936  
2.6849  
2.6776  
2.6718  
2.6660  
2.6315  
2.6133  
2.5914  
1.8167  
1.7977  
1.7842  
1.7646  
1.7072  
1.7037  
1.6940  
1.6871  
1.6770  
1.6744  
1.6707  
1.6592  
1.6564  
1.6506  
1.6437  
1.6308  
1.6261  
1.6311  
1.6260  
1.6107  
1.5761  
1.5672  
1.5665  
1.5553  
1.5484  
1.5275  
1.5270  
1.5150  
1.5111  
1.4959  
1.4939  
1.0337  
1.0250  
1.0173  
1.0100  
0.9971  
0.9911  
0.9643  
0.9613  
0.9489  
0.9351

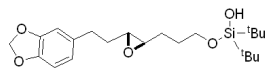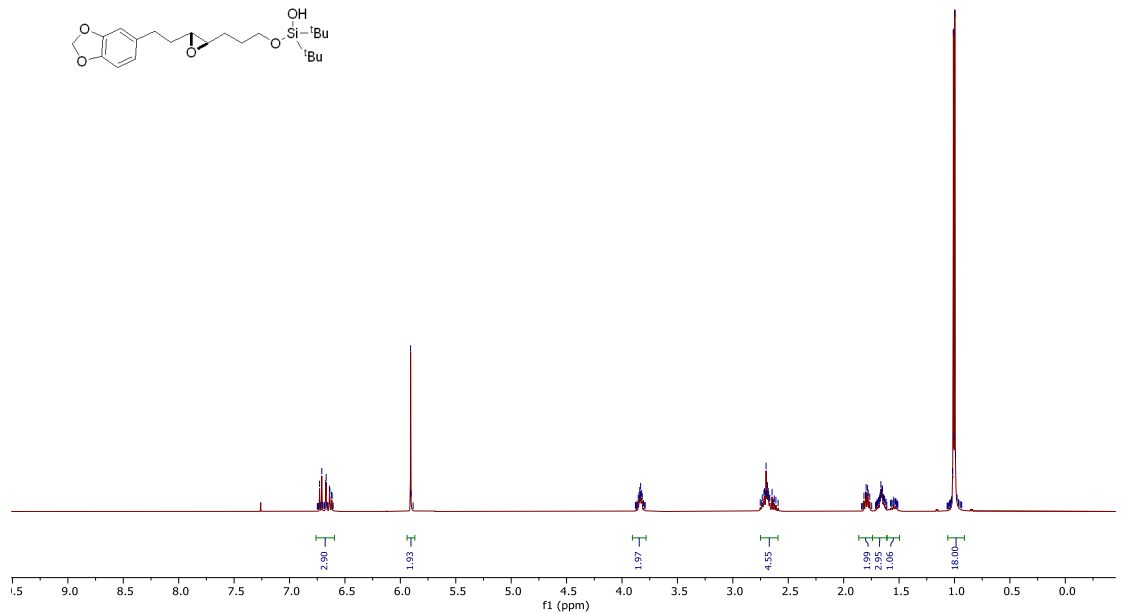

147.73  
145.87  
135.18  
121.25  
108.92  
108.32  
100.90  
62.61  
59.40  
58.03  
34.14  
29.67  
28.22  
27.65  
27.60  
20.72  
20.55

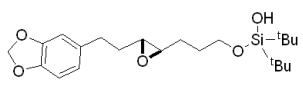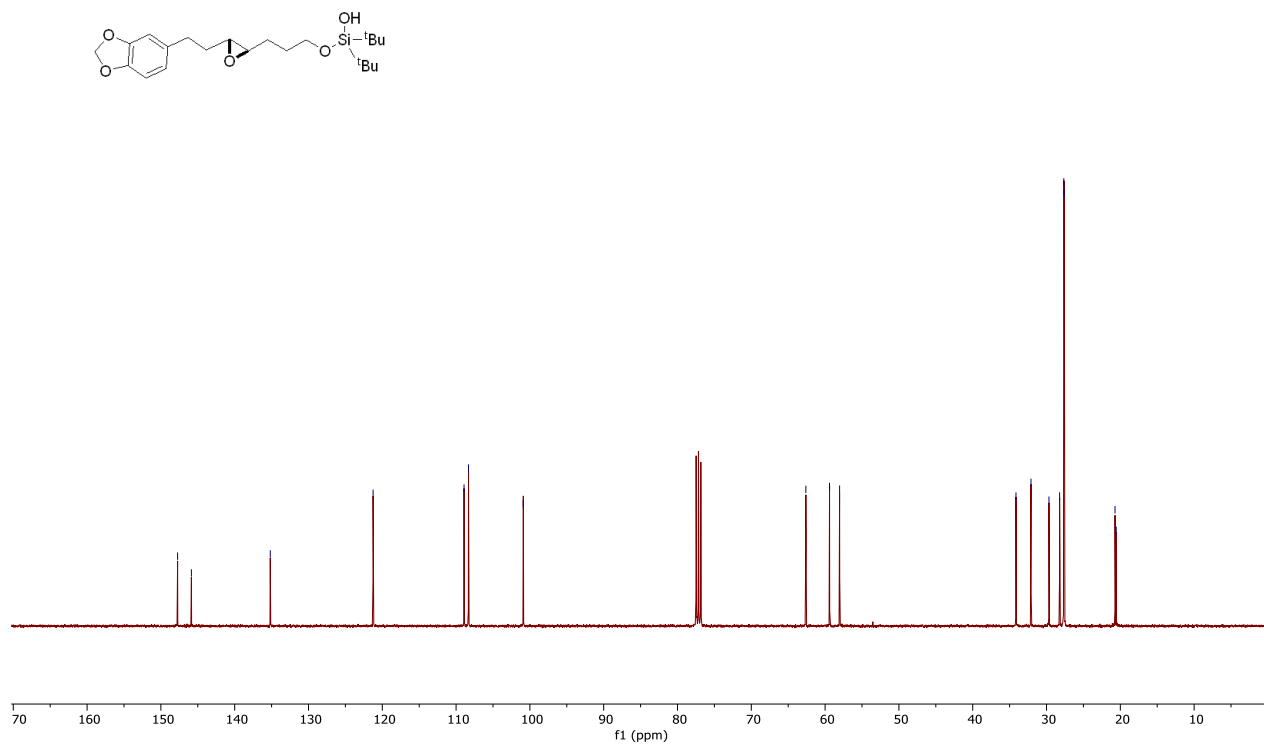

**Compound 20 (CDCl<sub>3</sub>, <sup>1</sup>H NMR: 400 MHz, <sup>13</sup>C{<sup>1</sup>H} NMR: 101 MHz)**

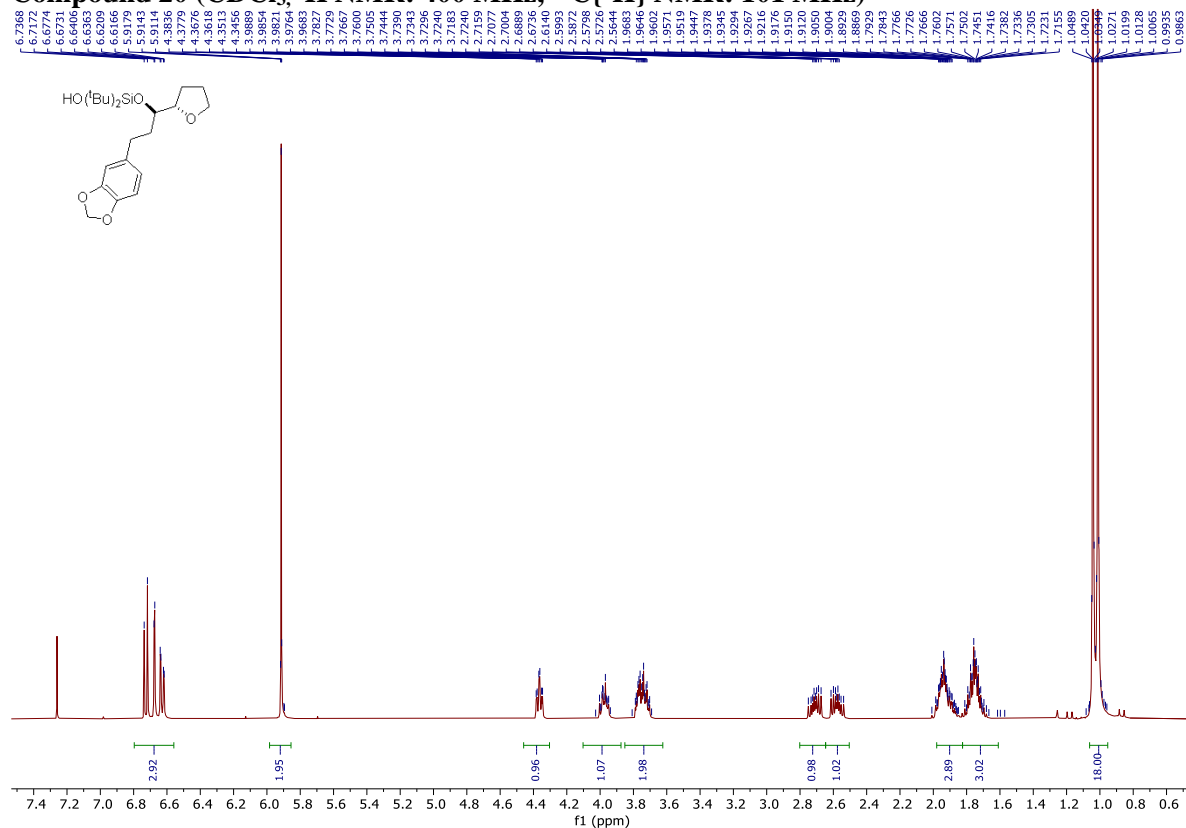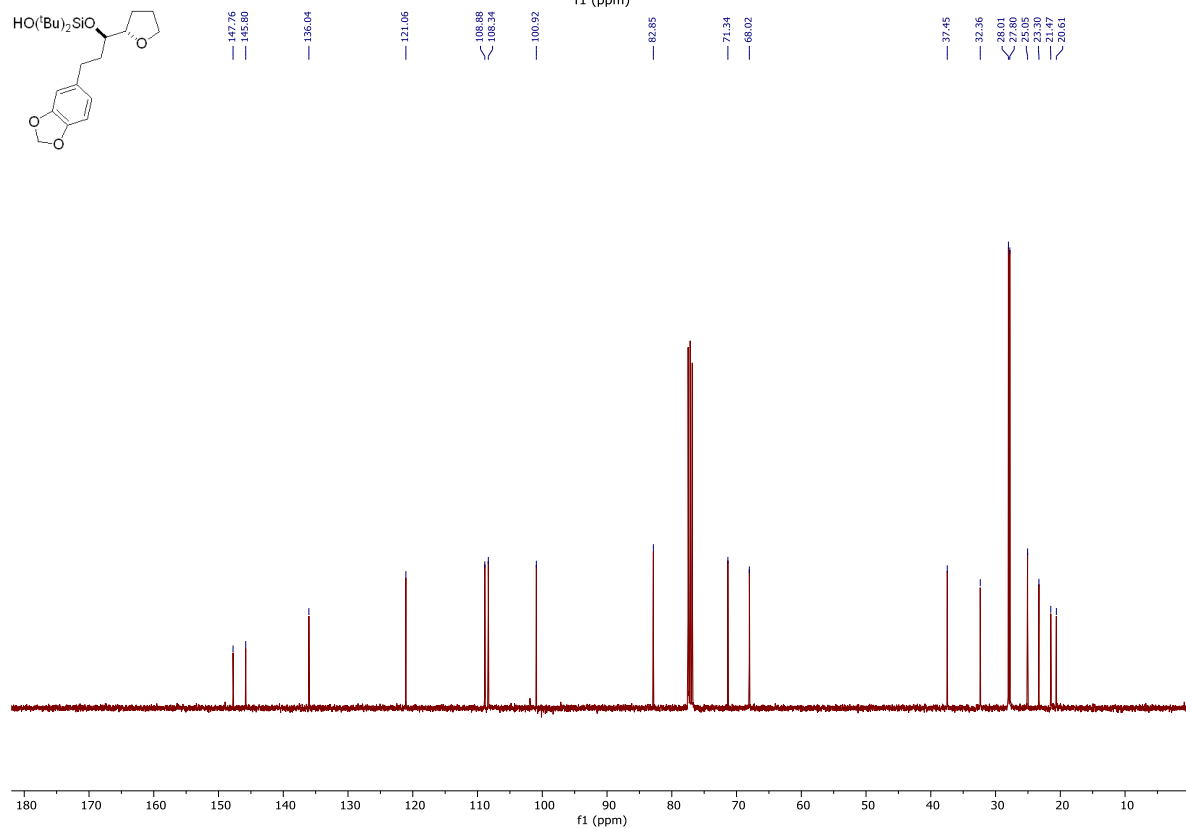

**Compound 21 (CDCl<sub>3</sub>, <sup>1</sup>H NMR: 400 MHz, <sup>13</sup>C{<sup>1</sup>H} NMR: 101 MHz)**

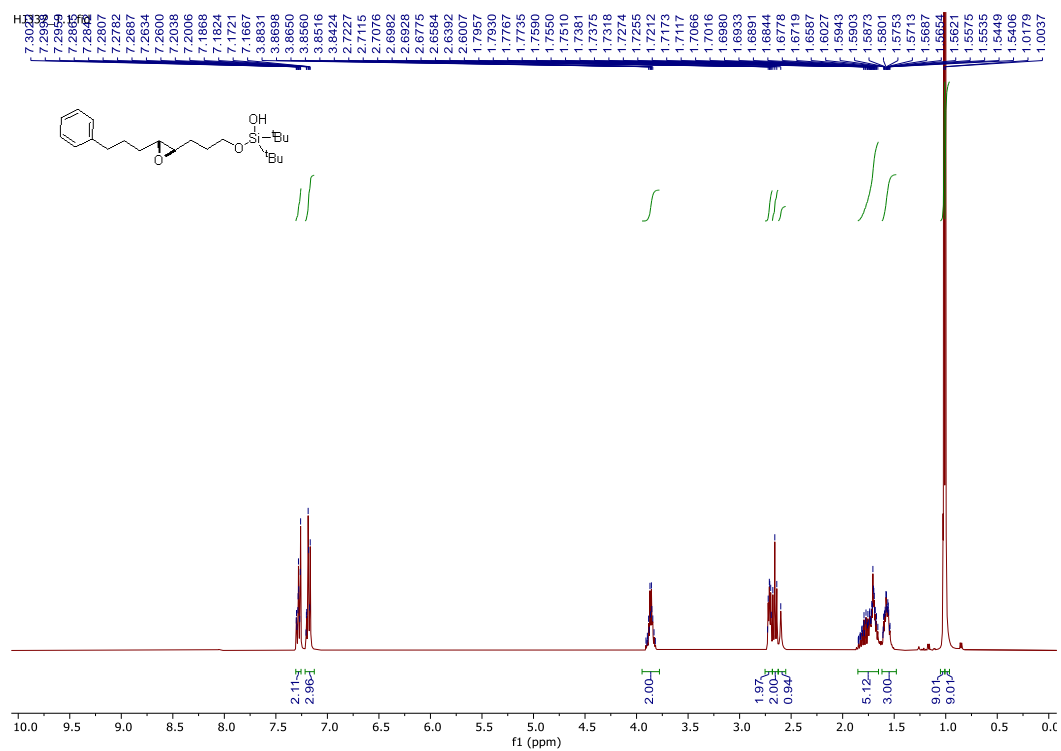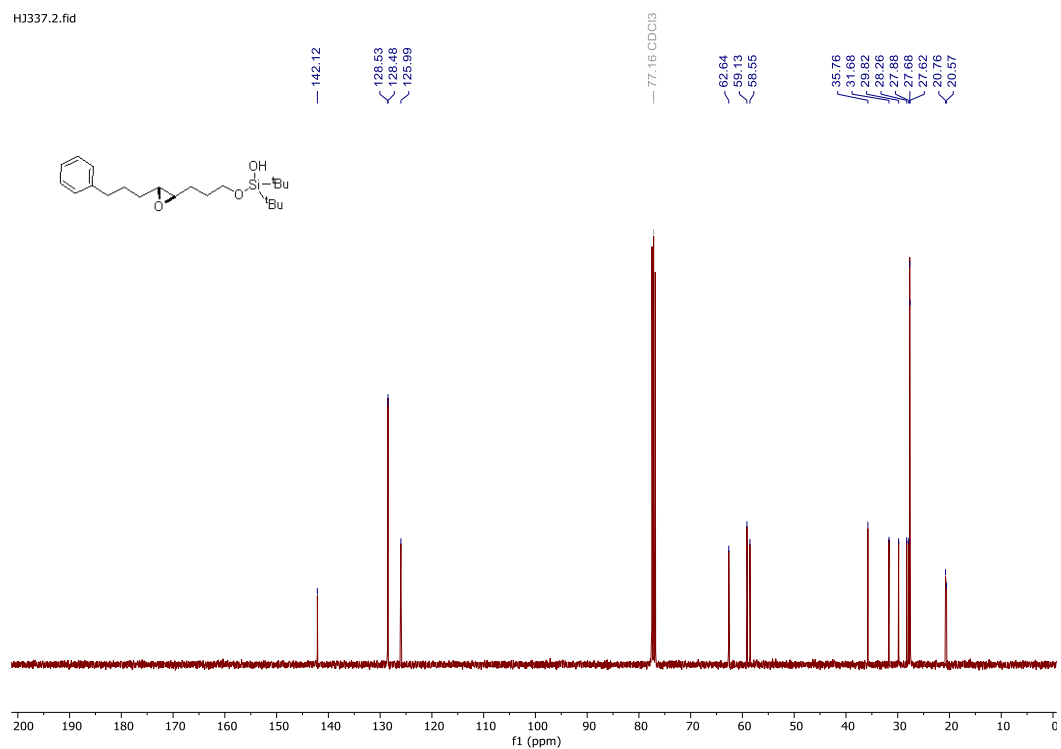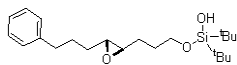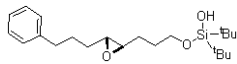

**Compound 22 (CDCl<sub>3</sub>, <sup>1</sup>H NMR: 400 MHz, <sup>13</sup>C{<sup>1</sup>H} NMR: 101 MHz)**

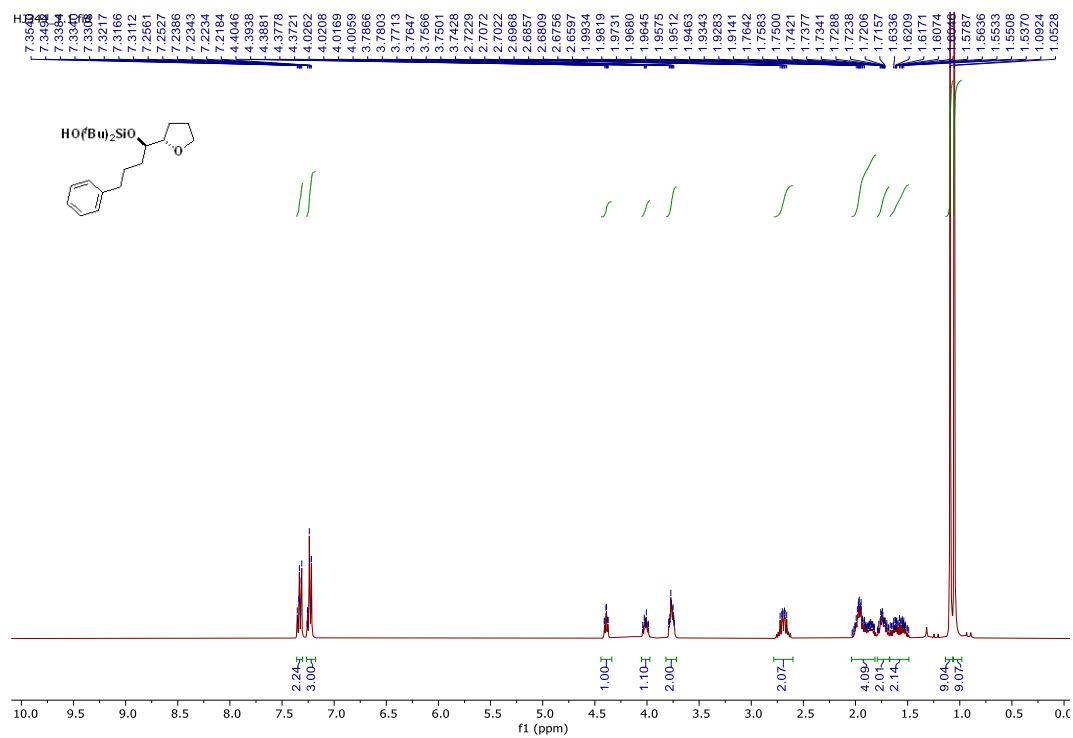

HJ344.2.fid

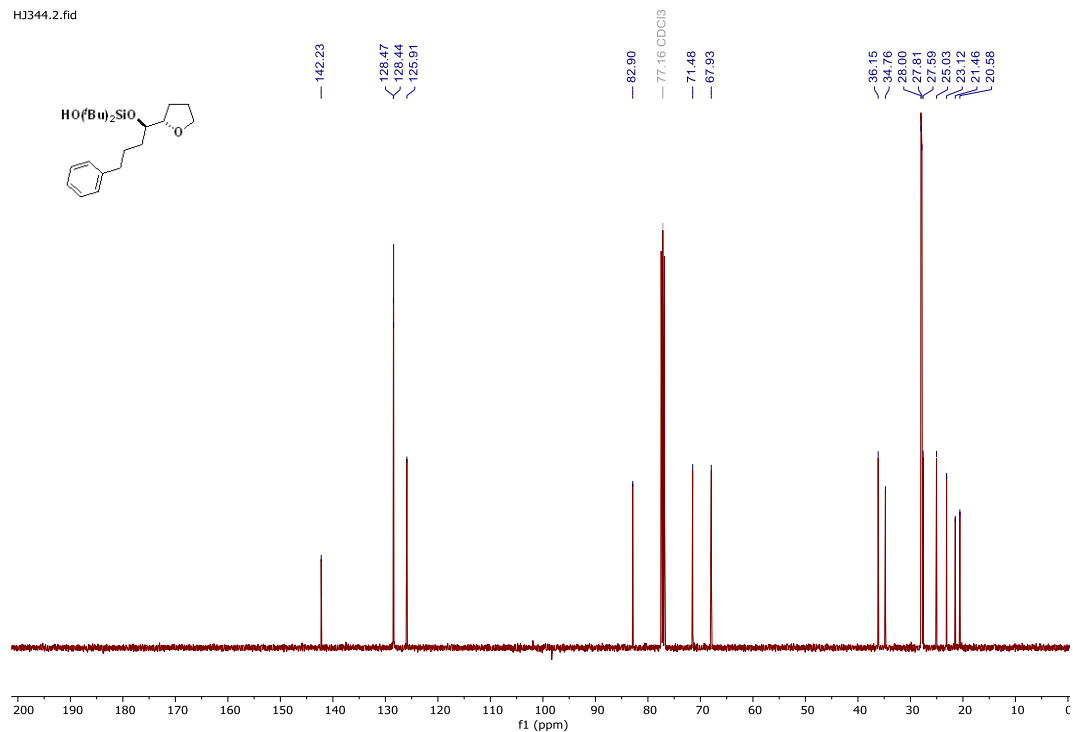

**Compound 23 (CDCl<sub>3</sub>, <sup>1</sup>H NMR: 400 MHz, <sup>13</sup>C{<sup>1</sup>H} NMR: 101 MHz)**

7.1054, 7.0975, 7.0816, 7.0761, 7.0687, 6.8347, 6.8295, 6.8185, 6.8056, 3.8904, 3.8796, 3.8663, 3.8613, 3.8580, 3.8475, 3.8378, 3.8265, 3.8152, 3.7758, 2.7195, 2.7138, 2.6995, 2.6898, 2.6862, 2.6139, 2.5948, 2.5757, 1.7898, 1.7866, 1.7825, 1.7684, 1.7647, 1.7529, 1.7416, 1.7318, 1.7177, 1.7137, 1.7097, 1.7015, 1.6933, 1.6888, 1.6832, 1.6742, 1.6678, 1.6654, 1.6595, 1.6547, 1.6473, 1.6410, 1.6219, 1.6219, 1.6161, 1.6012, 1.5975, 1.5917, 1.5890, 1.5815, 1.5695, 1.5695, 1.5663, 1.5593, 1.5480, 1.5436, 1.5362, 1.5318, 1.5260, 1.5210, 1.5172, 1.0347, 1.0215, 1.0145, 1.0093, 0.9936, 0.9762, 0.9649, 0.9499, 0.9387, 0.9323

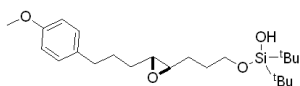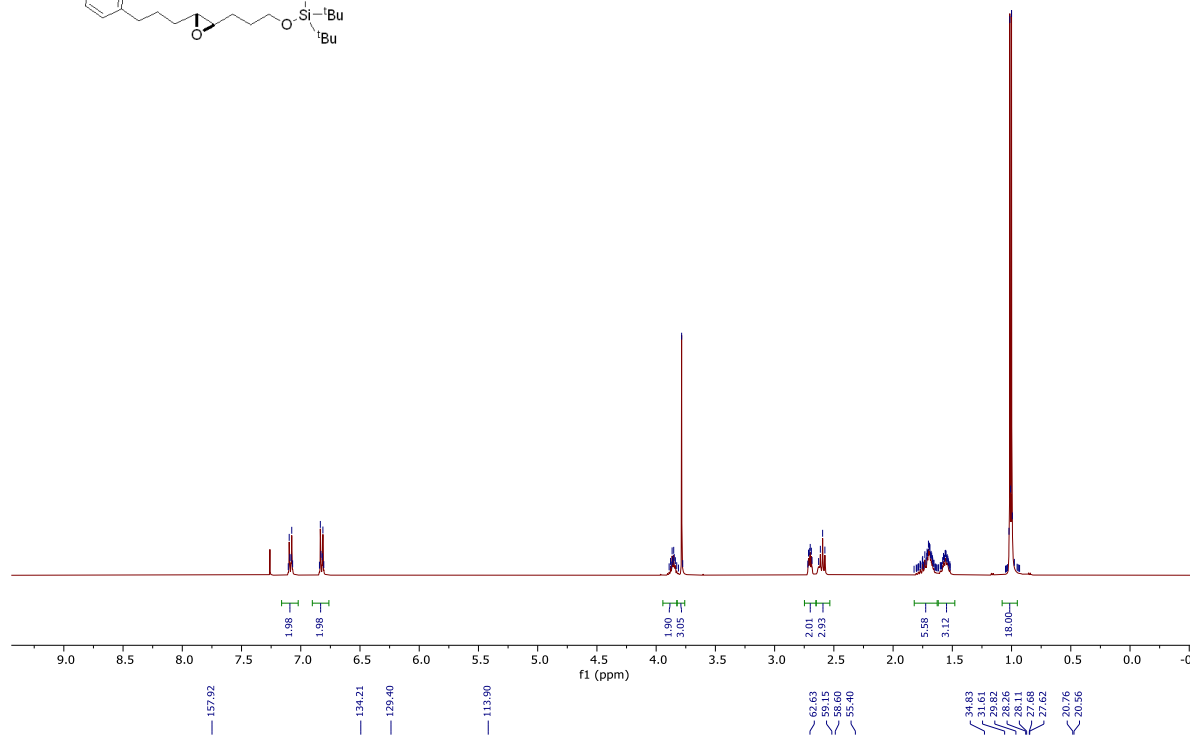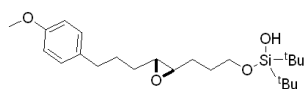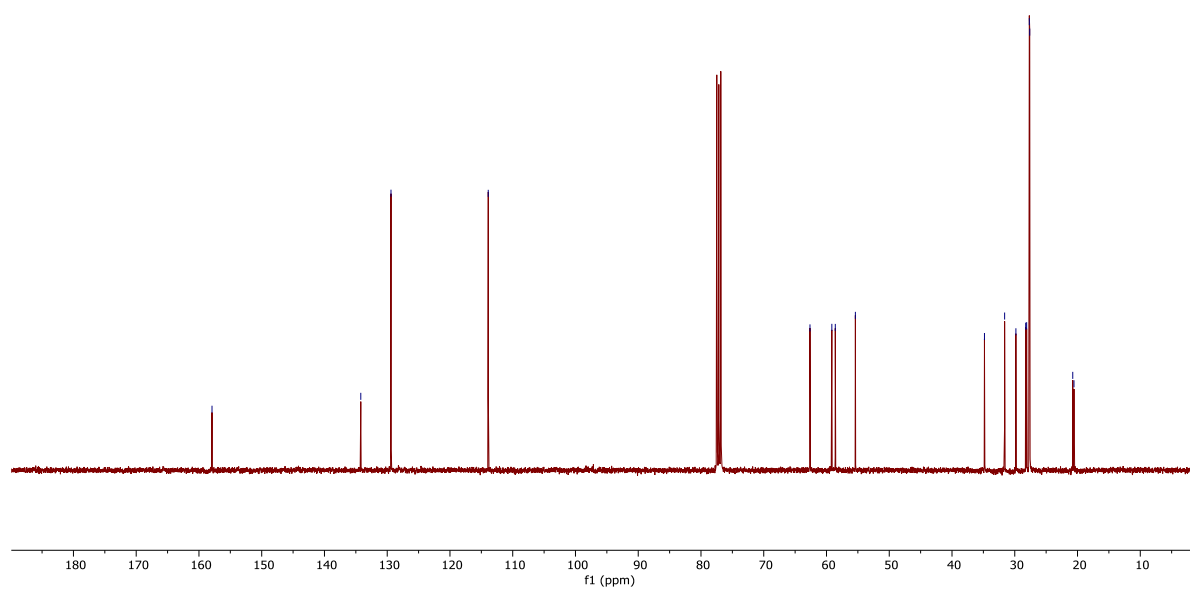

**Compound 24 (CDCl<sub>3</sub>, <sup>1</sup>H NMR: 400 MHz, <sup>13</sup>C{<sup>1</sup>H} NMR: 101 MHz)**

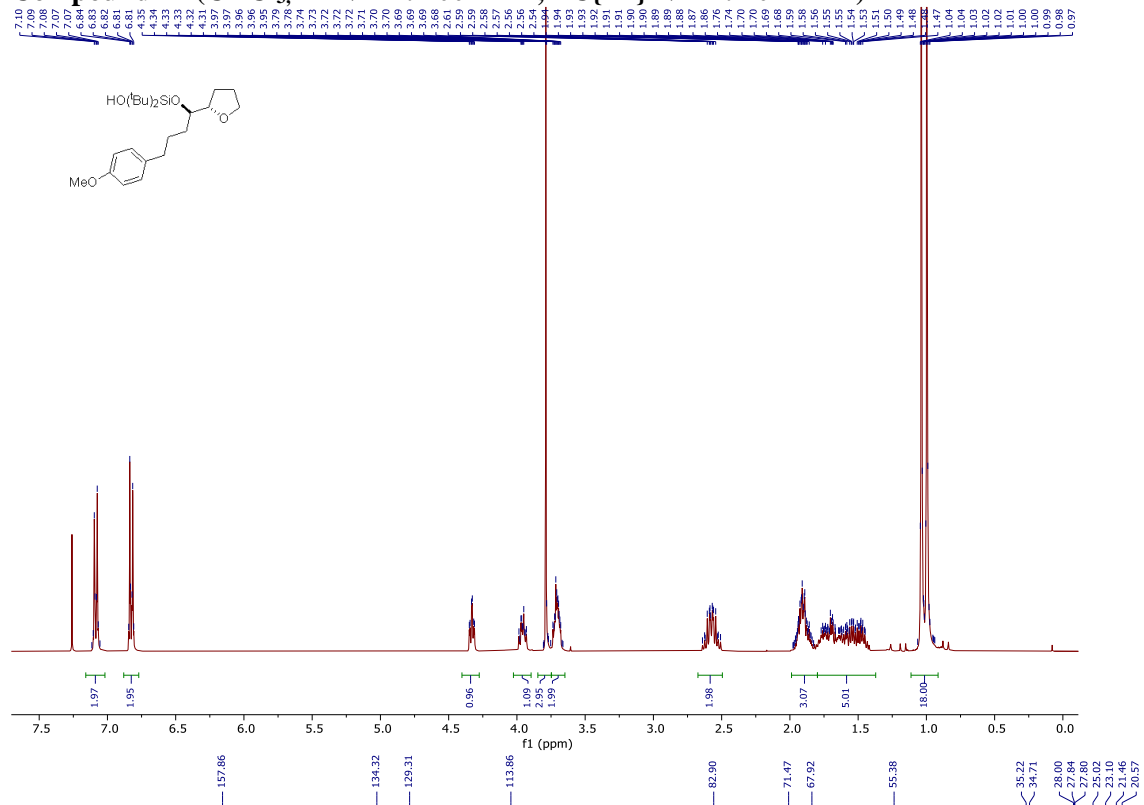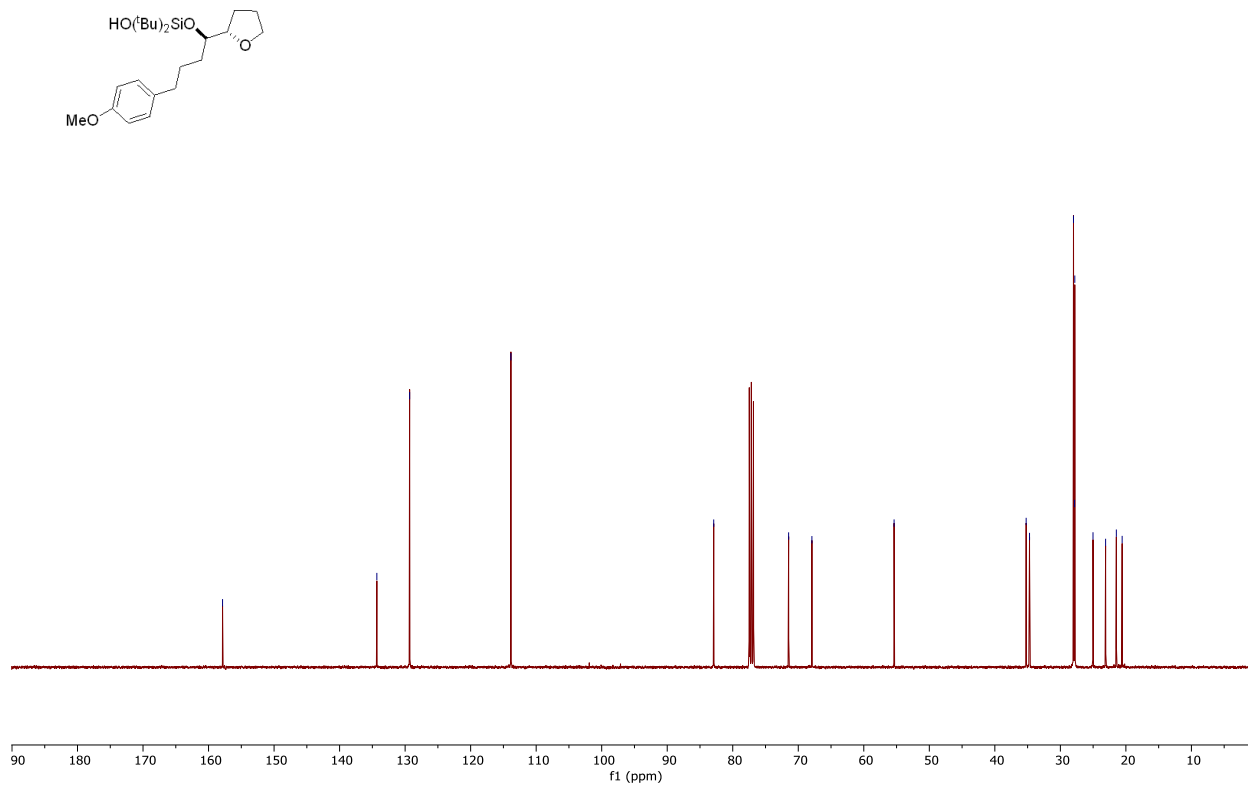



**Compound 25 (CDCl<sub>3</sub>, <sup>1</sup>H NMR: 400 MHz, <sup>13</sup>C{<sup>1</sup>H} NMR: 101 MHz)**

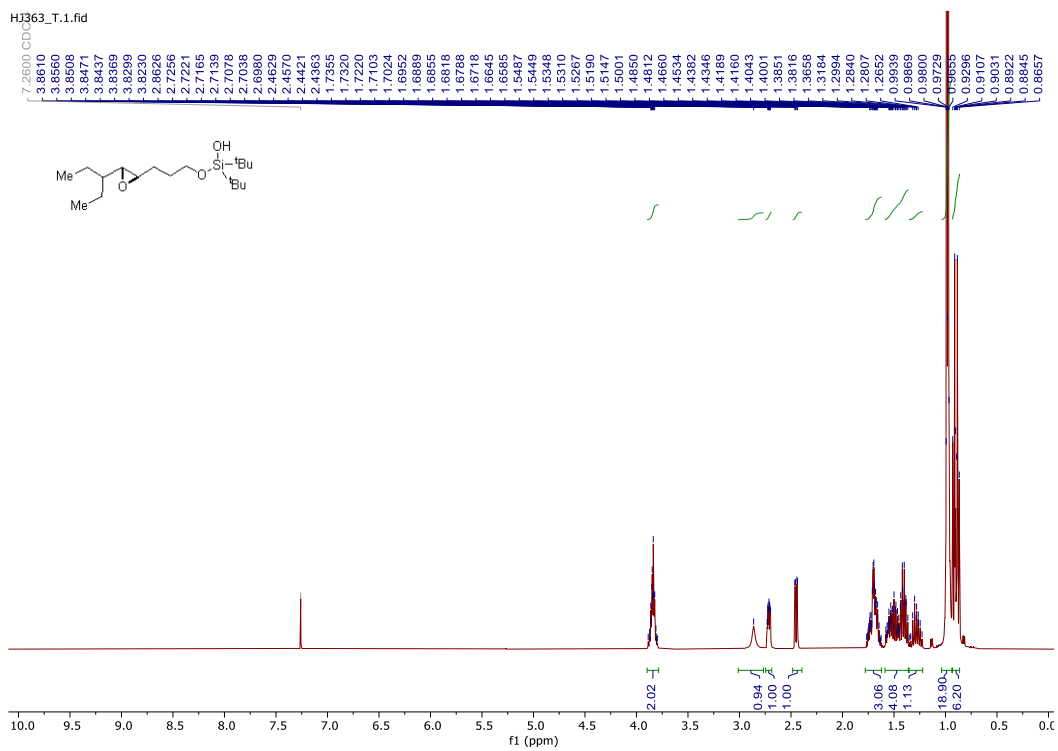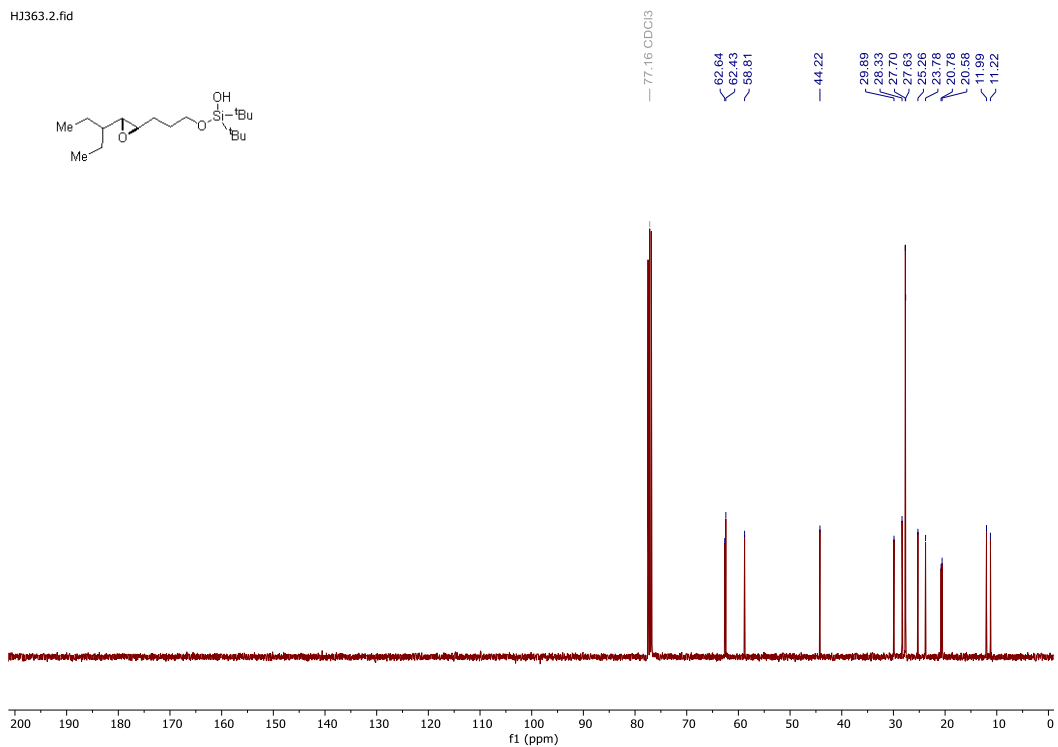

# Compound 26 (CDCl<sub>3</sub>, <sup>1</sup>H NMR: 400 MHz, <sup>13</sup>C{<sup>1</sup>H} NMR: 101 MHz)

HJ391\_Top.1.fid

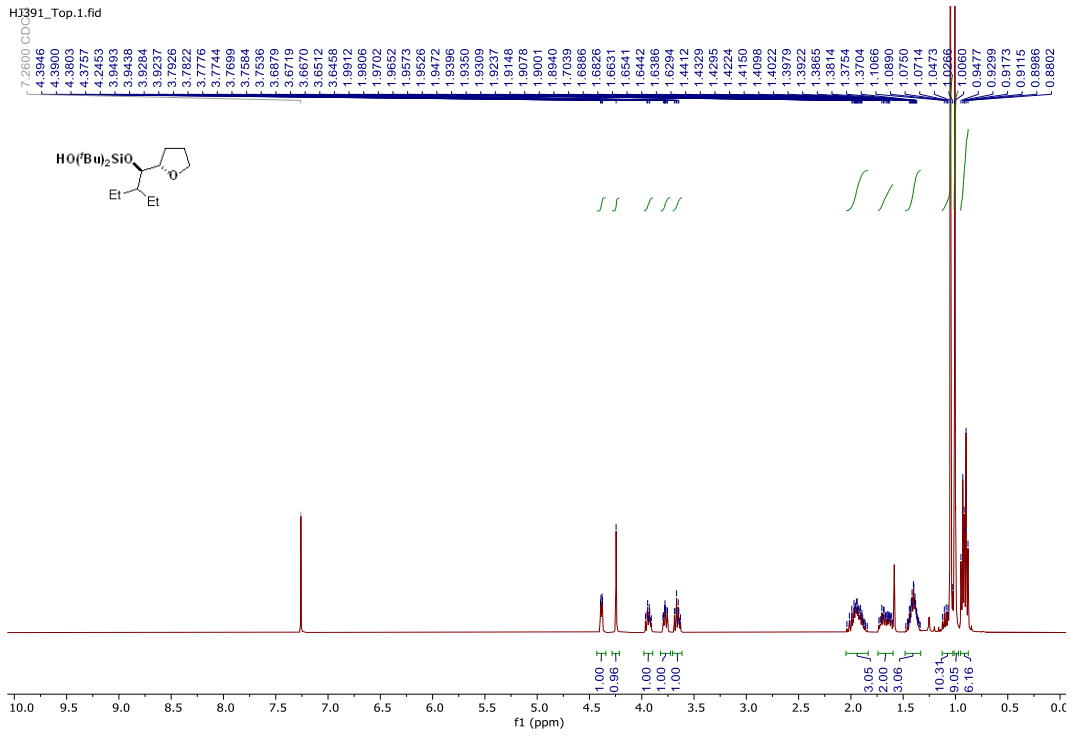

HJ367.2.fid

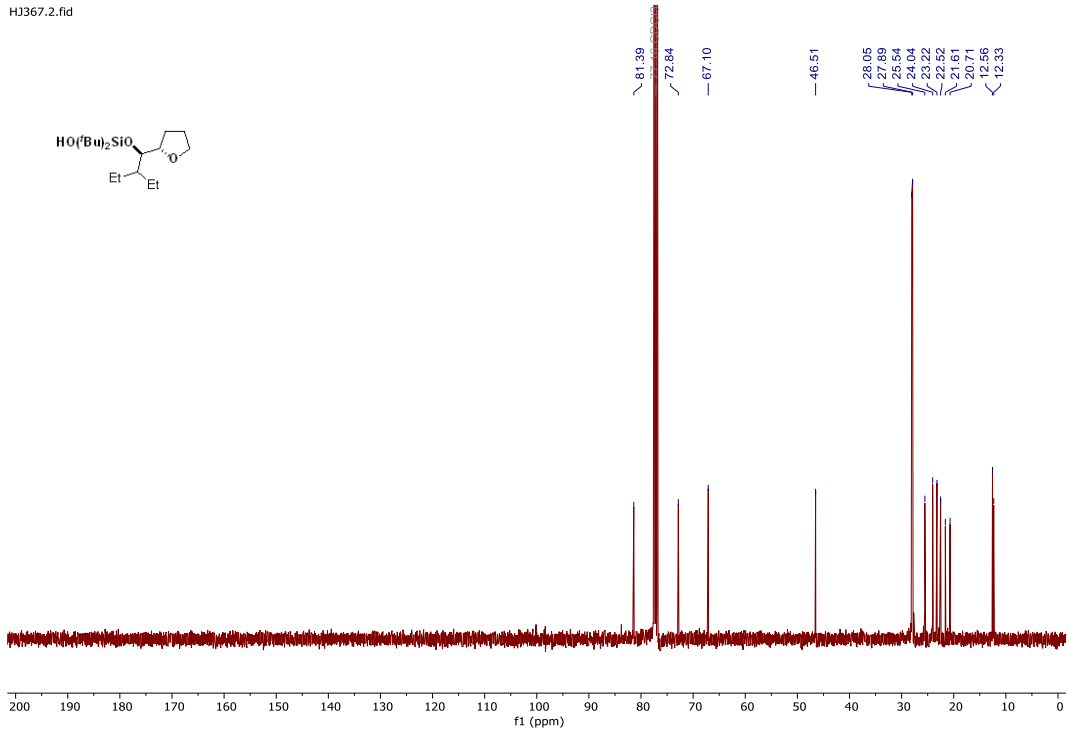

# Compound 27 (CDCl<sub>3</sub>, <sup>1</sup>H NMR: 400 MHz, <sup>13</sup>C{<sup>1</sup>H} NMR: 101 MHz)

HJ357\_T.1.fid

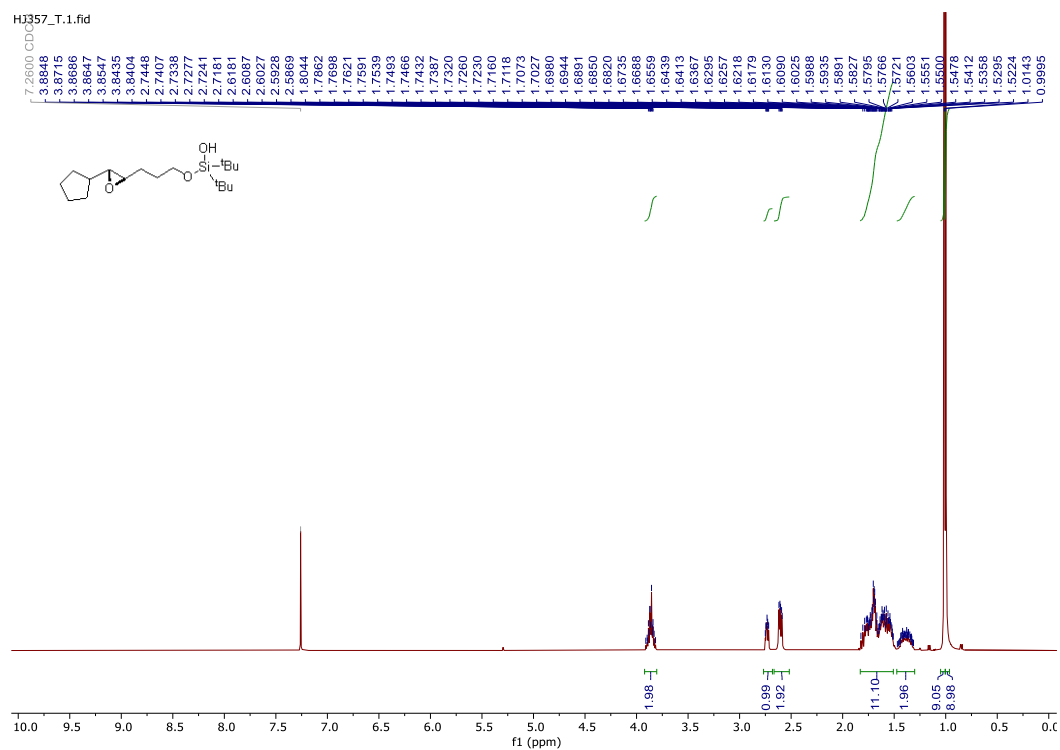

HJ357.2.fid

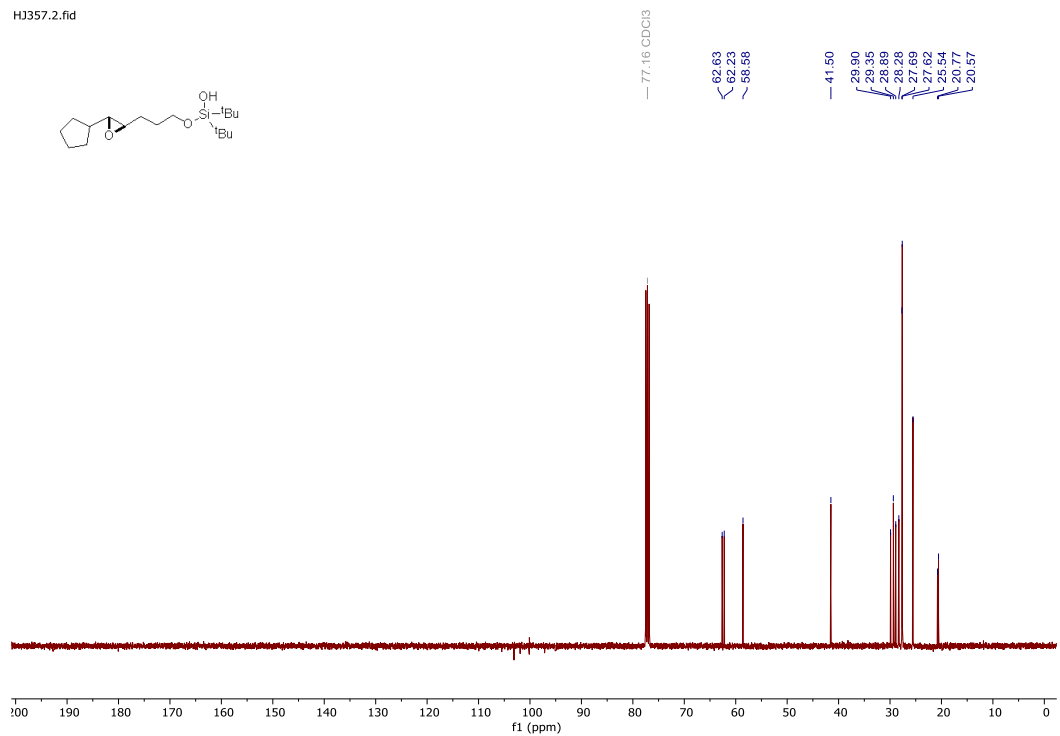

**Compound 28 (CDCl<sub>3</sub>, <sup>1</sup>H NMR: 400 MHz, <sup>13</sup>C{<sup>1</sup>H} NMR: 101 MHz)**

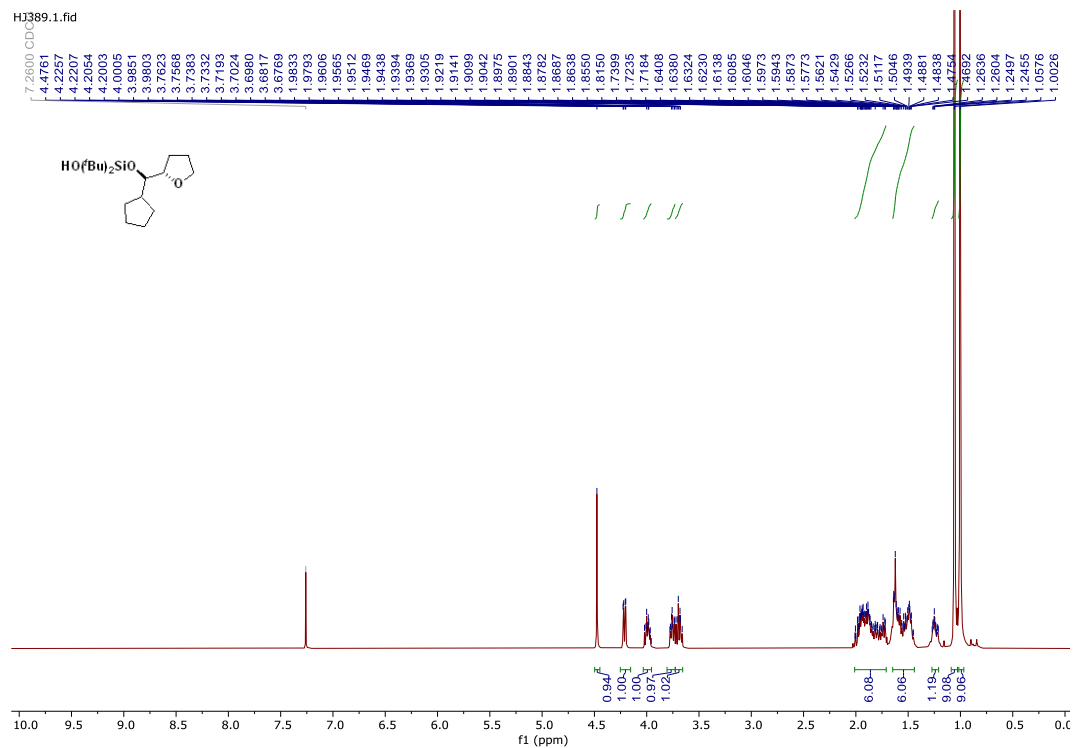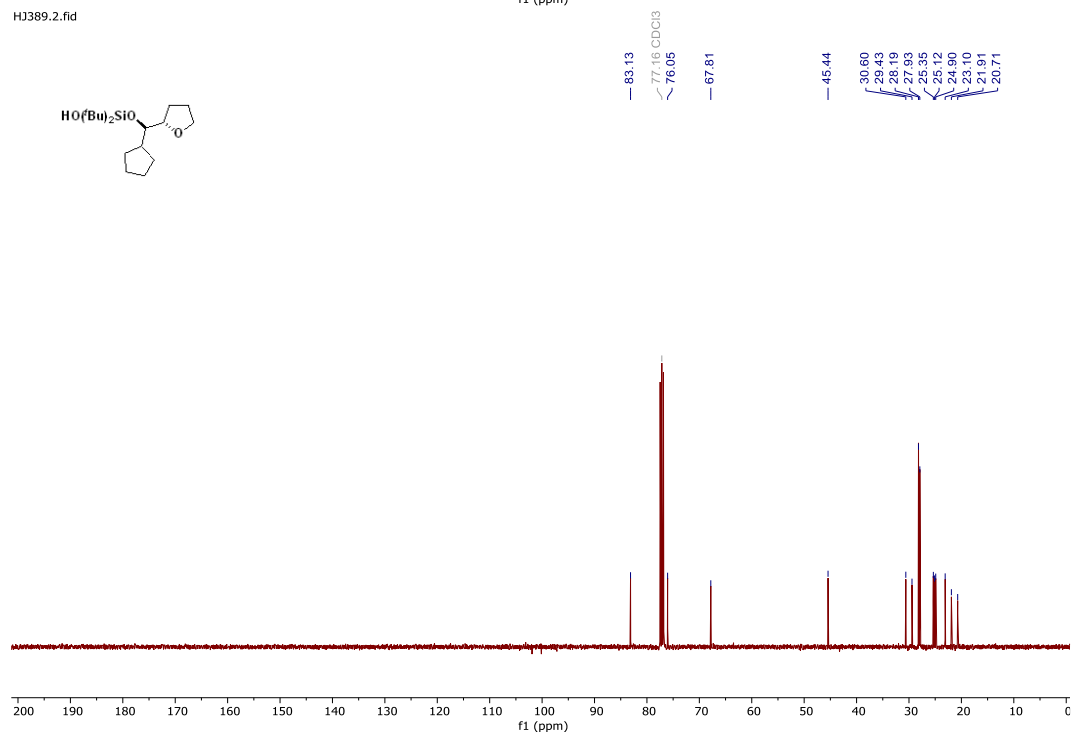

**Compound 29 (CDCl<sub>3</sub>, <sup>1</sup>H NMR: 400 MHz, <sup>13</sup>C{<sup>1</sup>H} NMR: 101 MHz)**

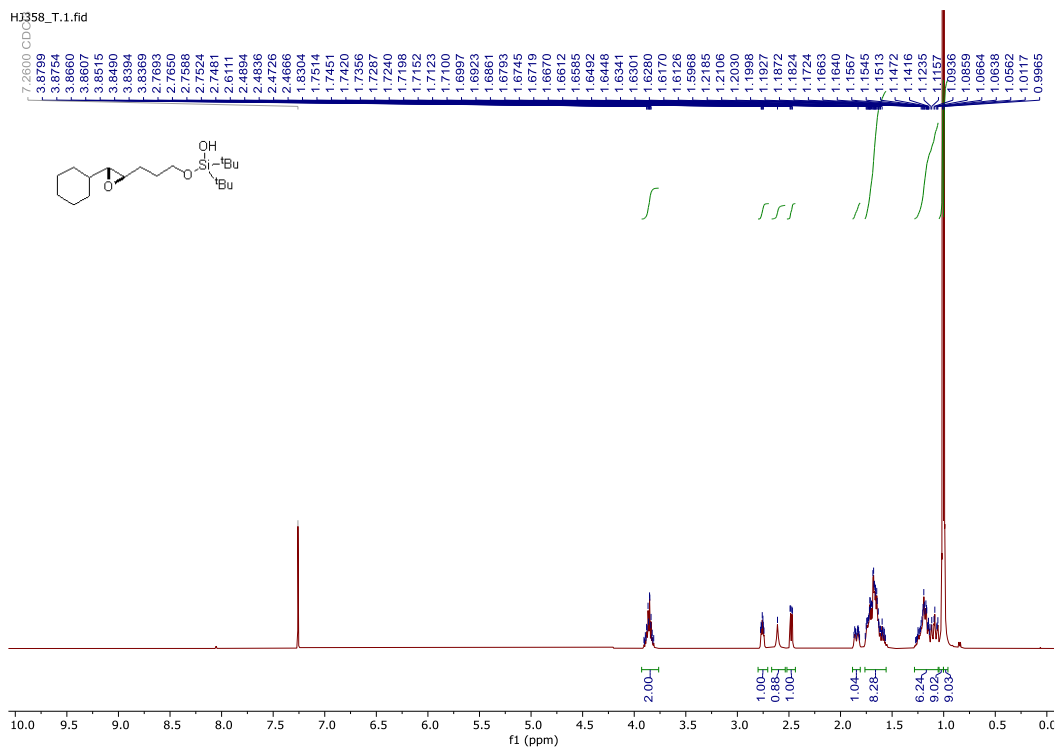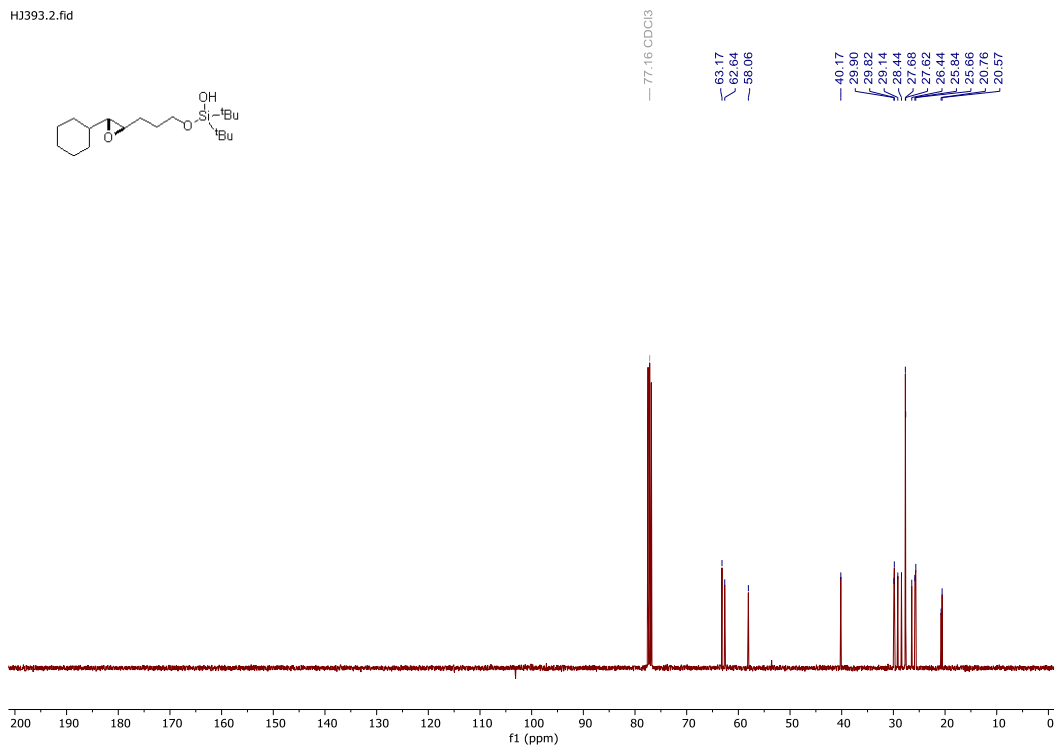

**Compound 30 (CDCl<sub>3</sub>, <sup>1</sup>H NMR: 400 MHz, <sup>13</sup>C{<sup>1</sup>H} NMR: 101 MHz)**

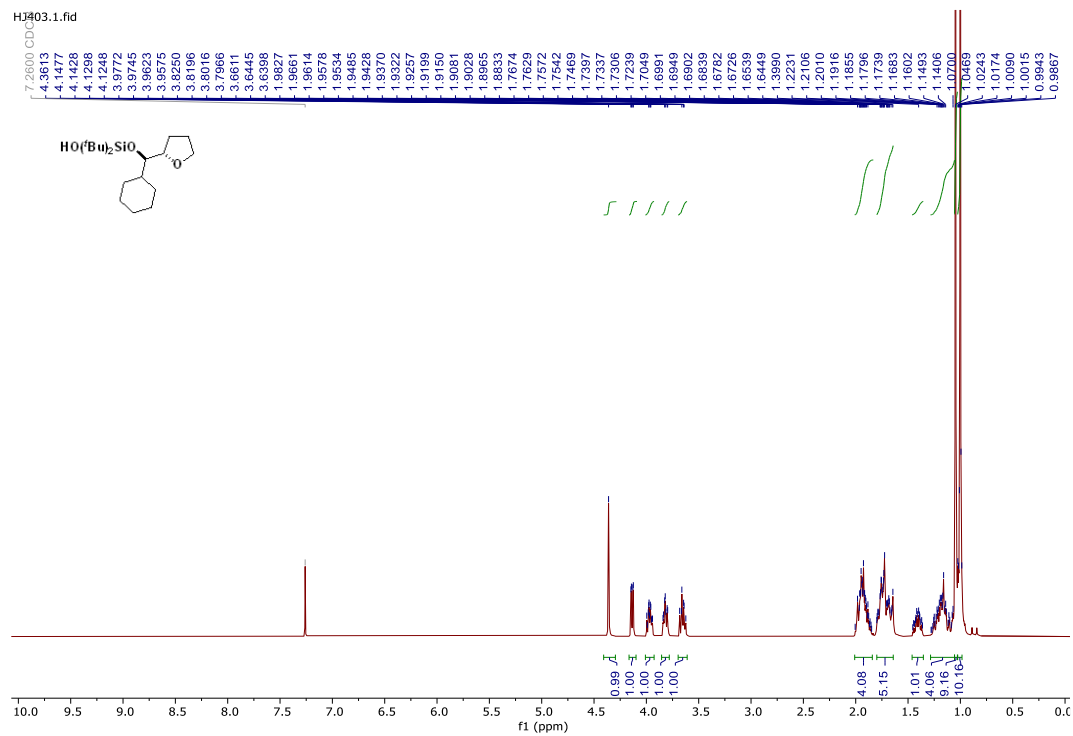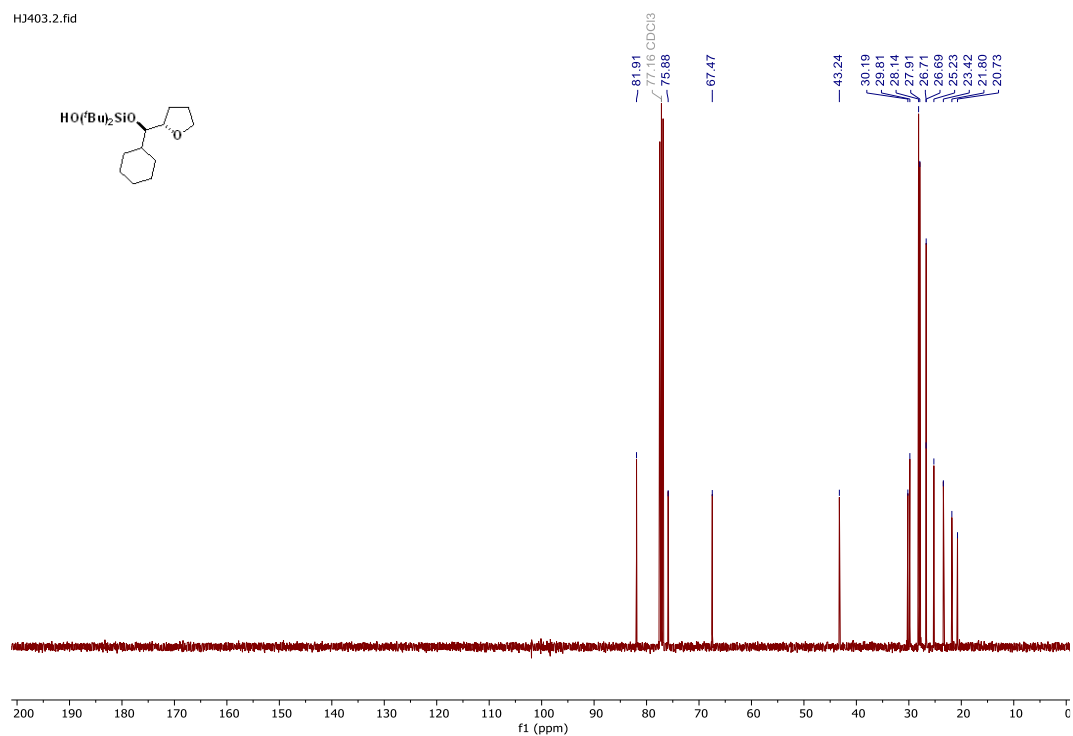

Compound 31 (CDCl<sub>3</sub>, <sup>1</sup>H NMR: 400 MHz, <sup>13</sup>C{<sup>1</sup>H} NMR: 101 MHz)

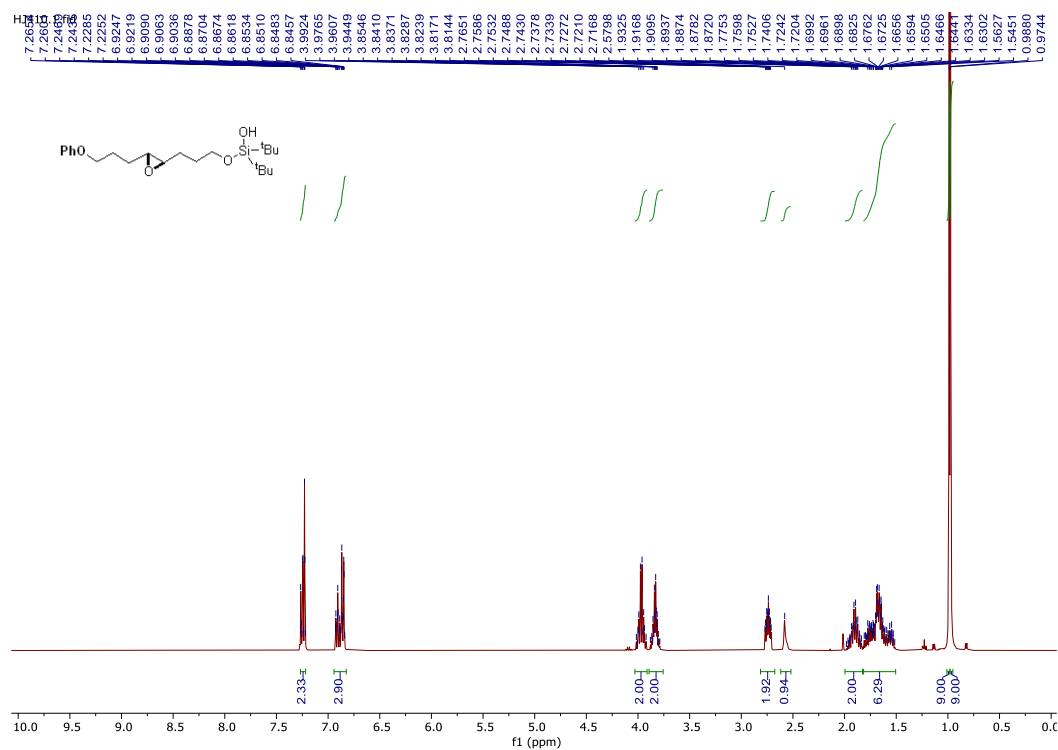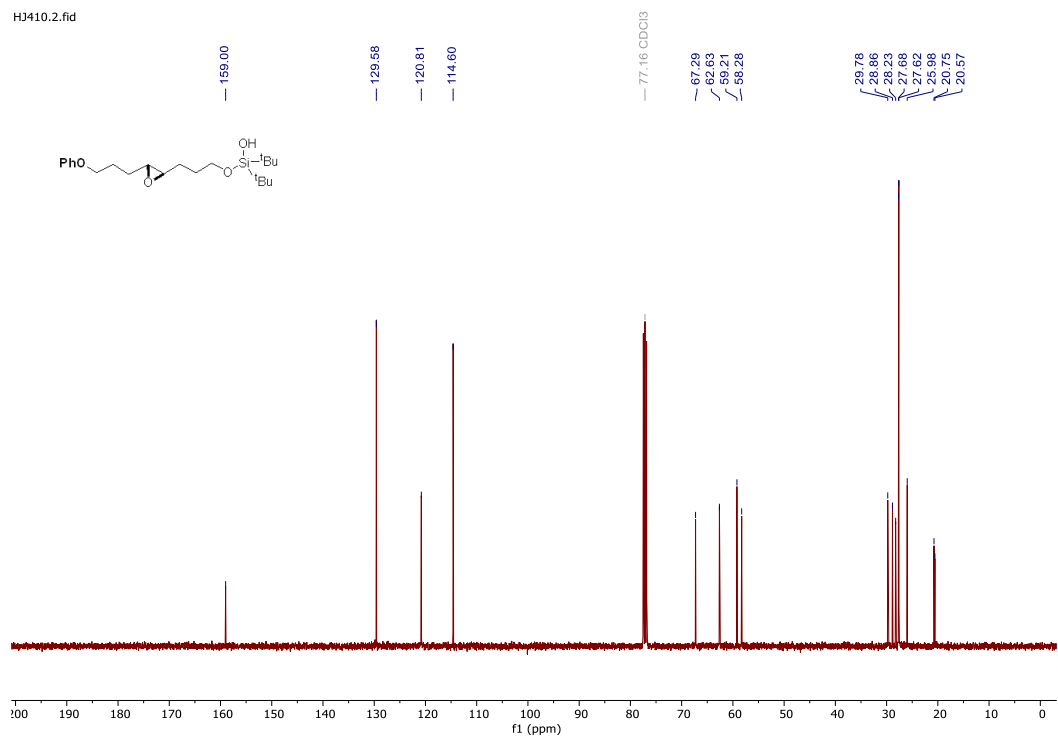

**Compound 32 (CDCl<sub>3</sub>, <sup>1</sup>H NMR: 400 MHz, <sup>13</sup>C{<sup>1</sup>H} NMR: 101 MHz)**

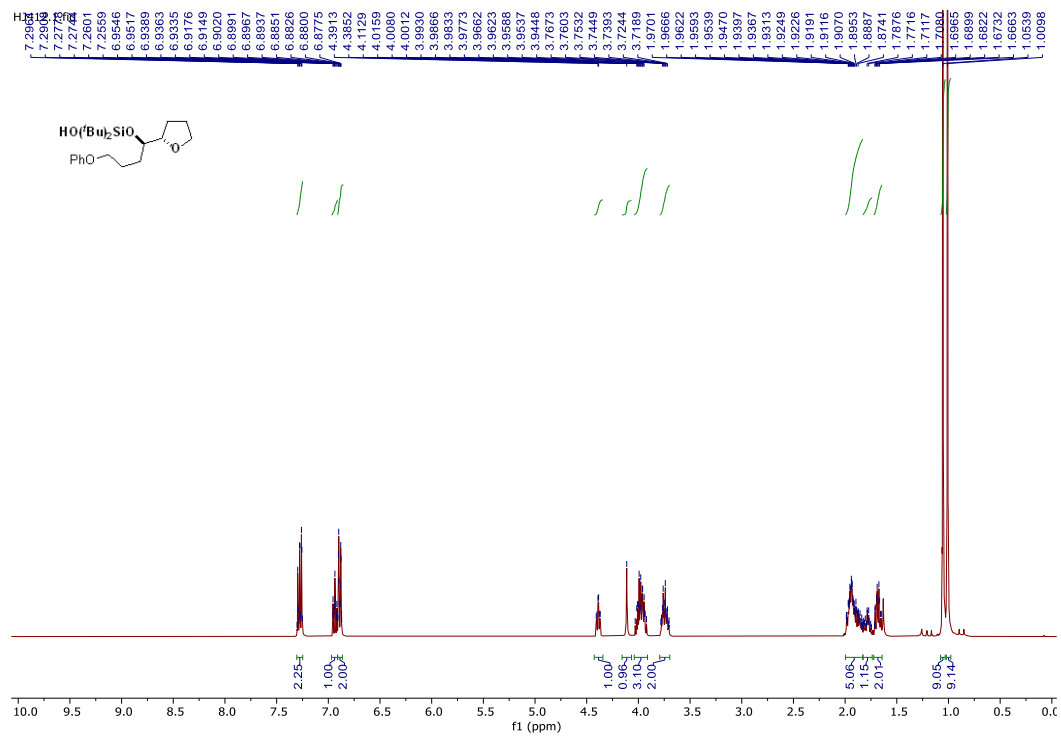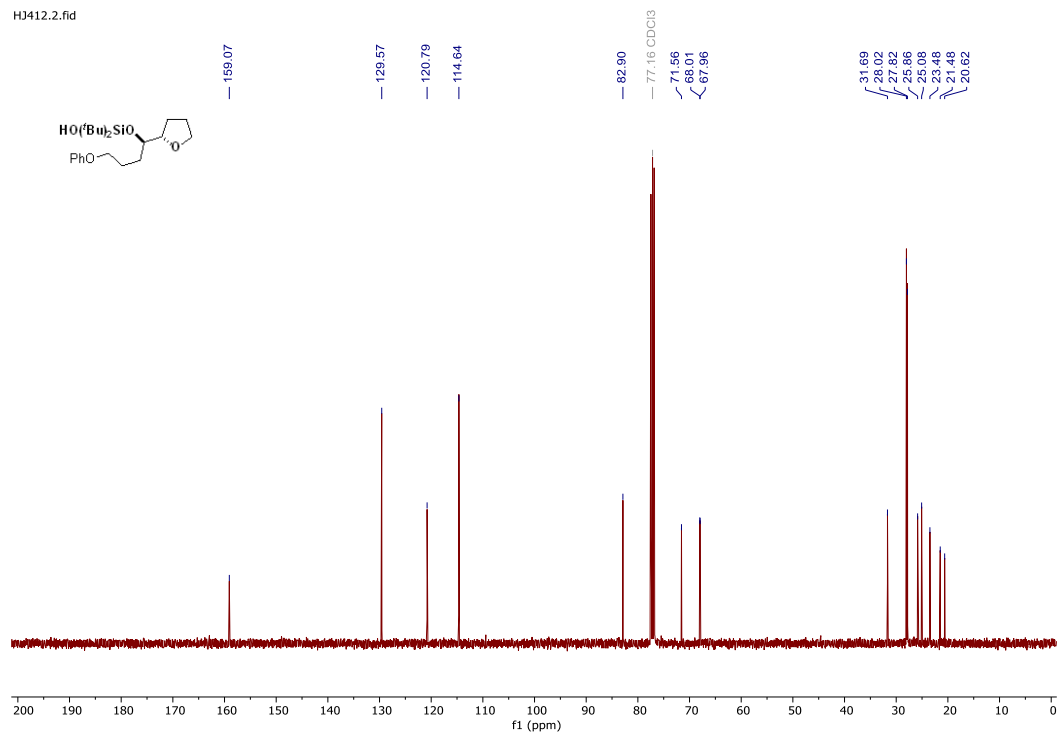



Compound 33 (CDCl<sub>3</sub>, <sup>1</sup>H NMR: 400 MHz, <sup>13</sup>C{<sup>1</sup>H} NMR: 101 MHz)

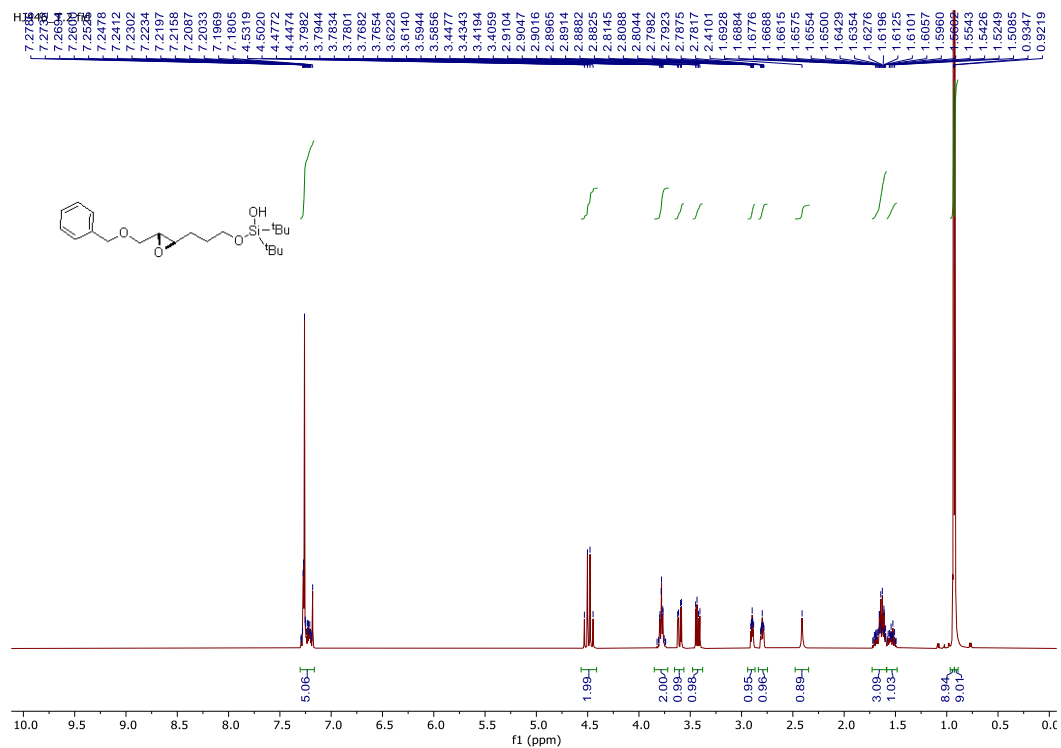

HJ446\_T.3.fid

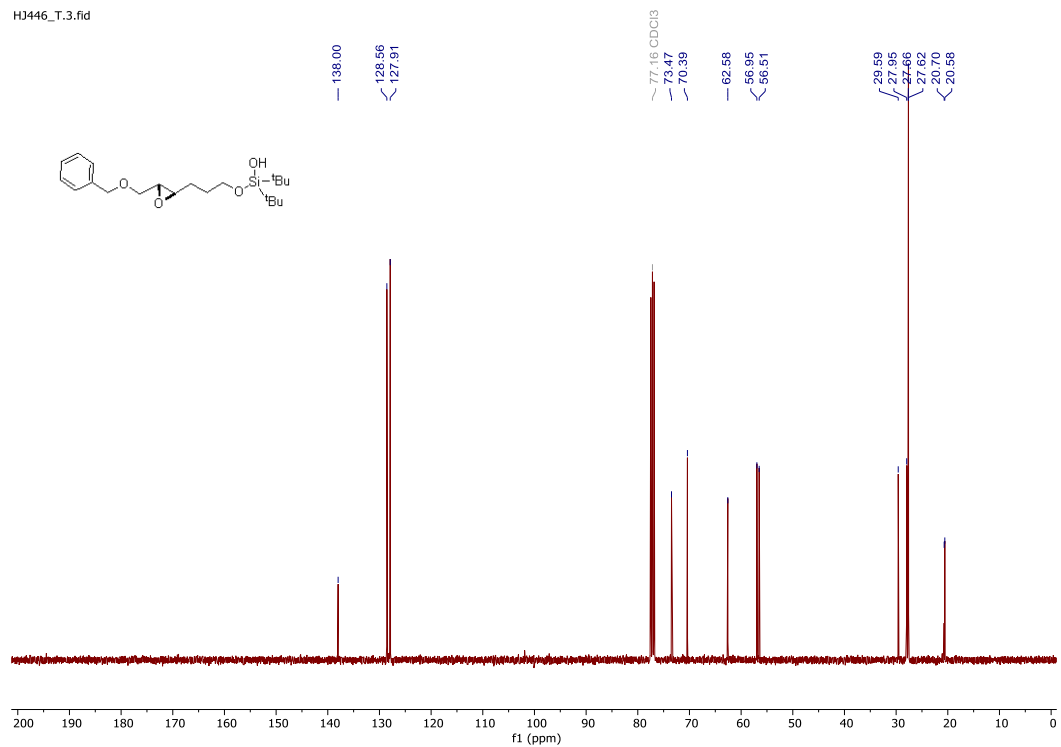

**Compound 34 (CDCl<sub>3</sub>, <sup>1</sup>H NMR: 400 MHz, <sup>13</sup>C{<sup>1</sup>H} NMR: 101 MHz)**

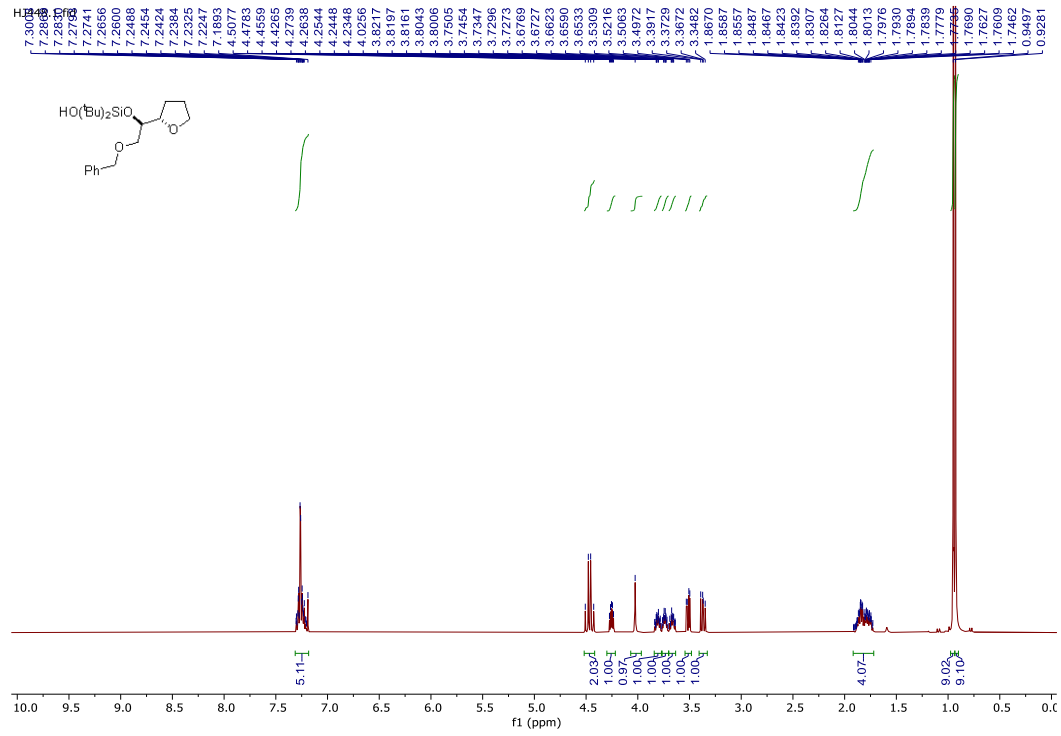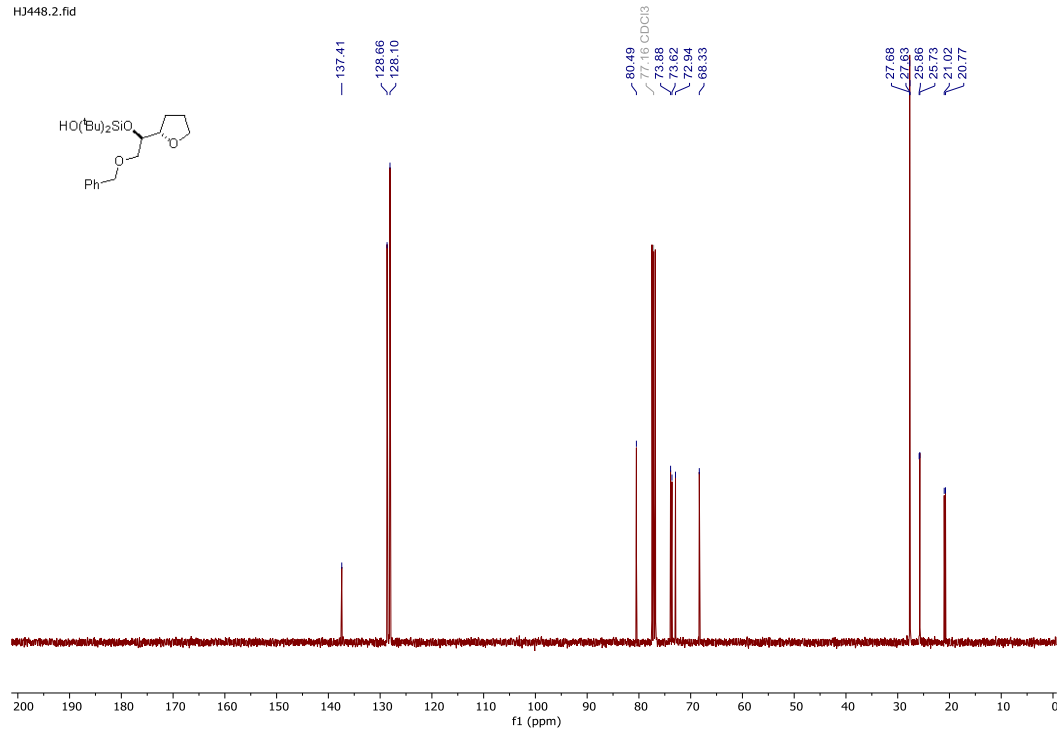

Compound 35 (CDCl<sub>3</sub>, <sup>1</sup>H NMR: 400 MHz, <sup>13</sup>C{<sup>1</sup>H} NMR: 101 MHz)

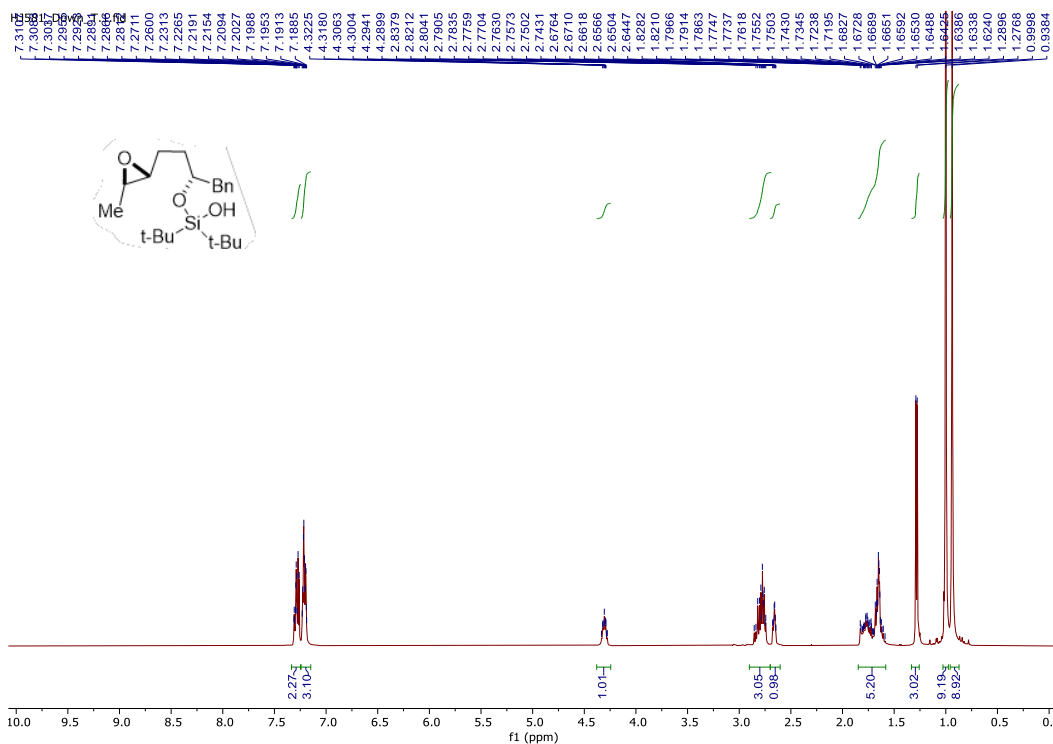

HJ581\_Down\_T.2.fid

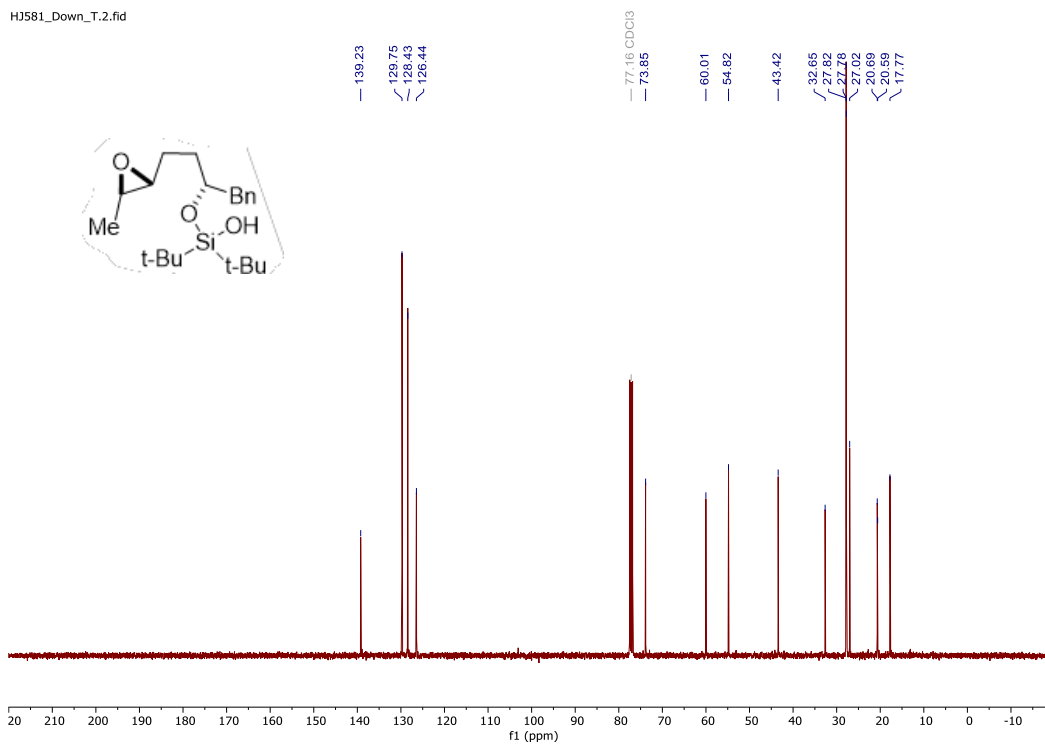

# Compound 36 (CDCl<sub>3</sub>, <sup>1</sup>H NMR: 500 MHz, <sup>13</sup>C{<sup>1</sup>H} NMR: 126 MHz)

HJ592\_Down.1.1.1r  
PROTON\_SPIN CDCl3 /opt/topspin harsh 50

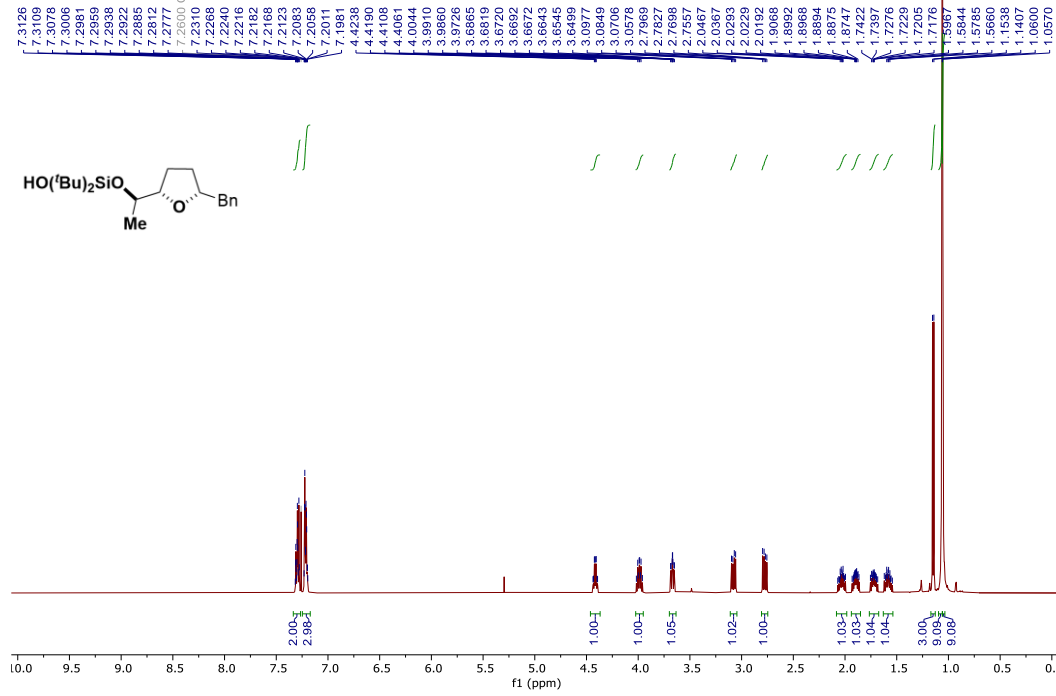

HJ592\_Down.2.1.1r  
C13CPD\_SIENA CDCl3 /opt/topspin harsh 50

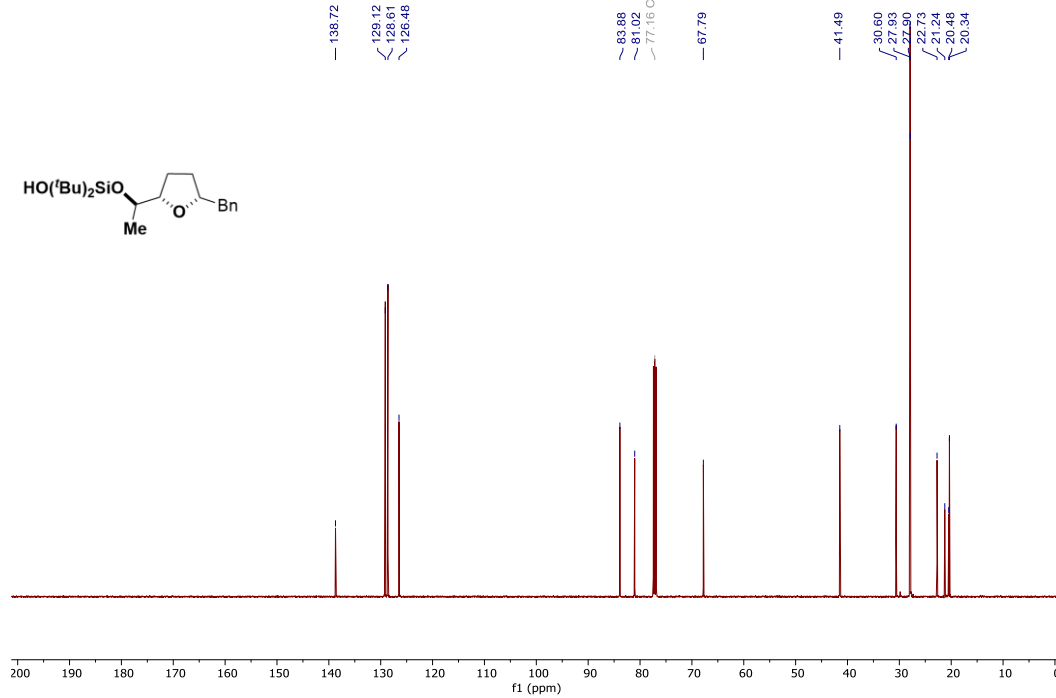

# Compound 39 (CDCl<sub>3</sub>, <sup>1</sup>H NMR: 400 MHz, <sup>13</sup>C{<sup>1</sup>H} NMR: 101 MHz)

HJ291\_Re.1.1.1r

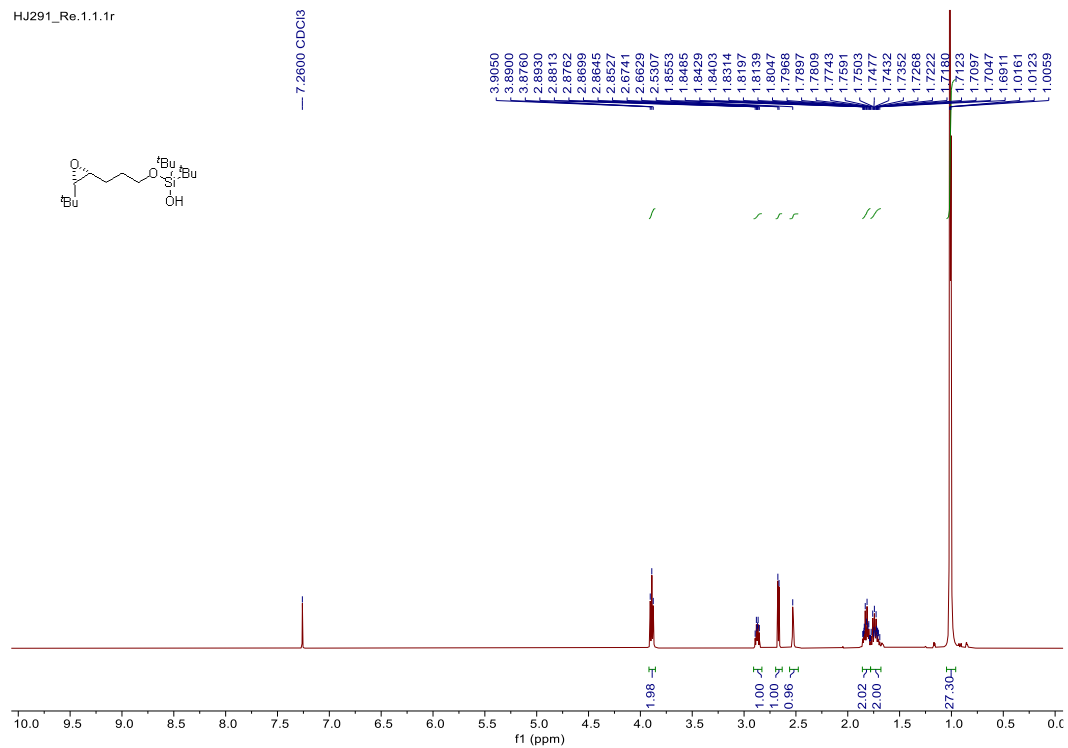

HJ291\_Re.2.1.1r

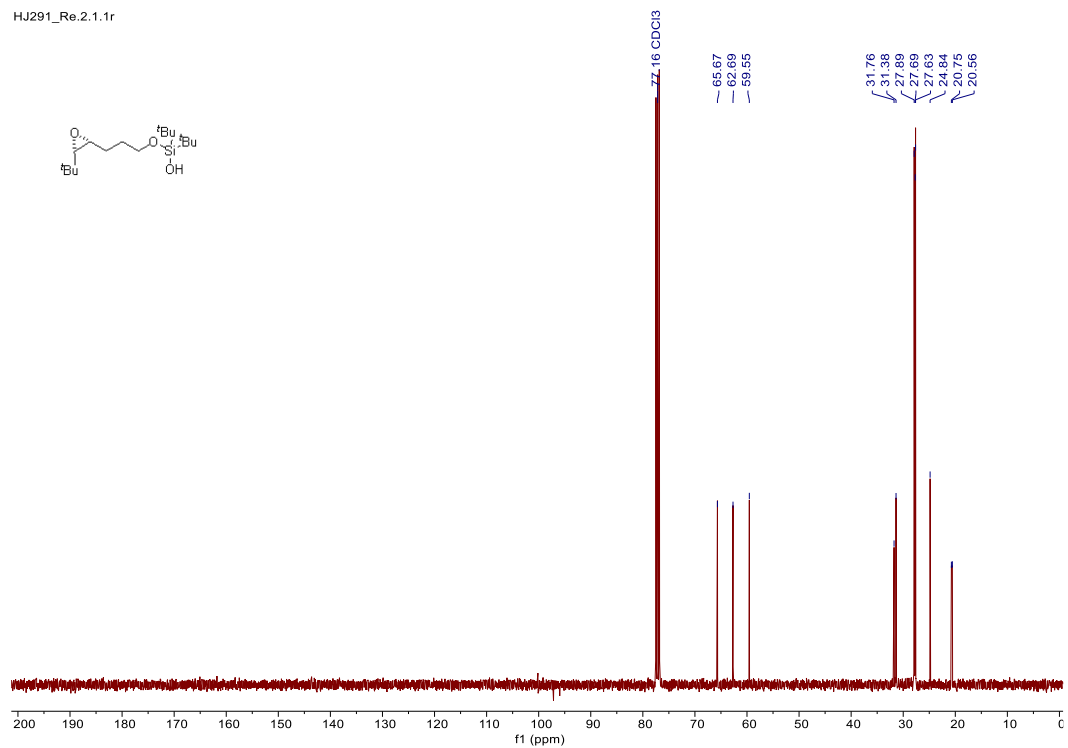

**Compound 40 (CDCl<sub>3</sub>, <sup>1</sup>H NMR: 400 MHz, <sup>13</sup>C{<sup>1</sup>H} NMR: 101 MHz)**

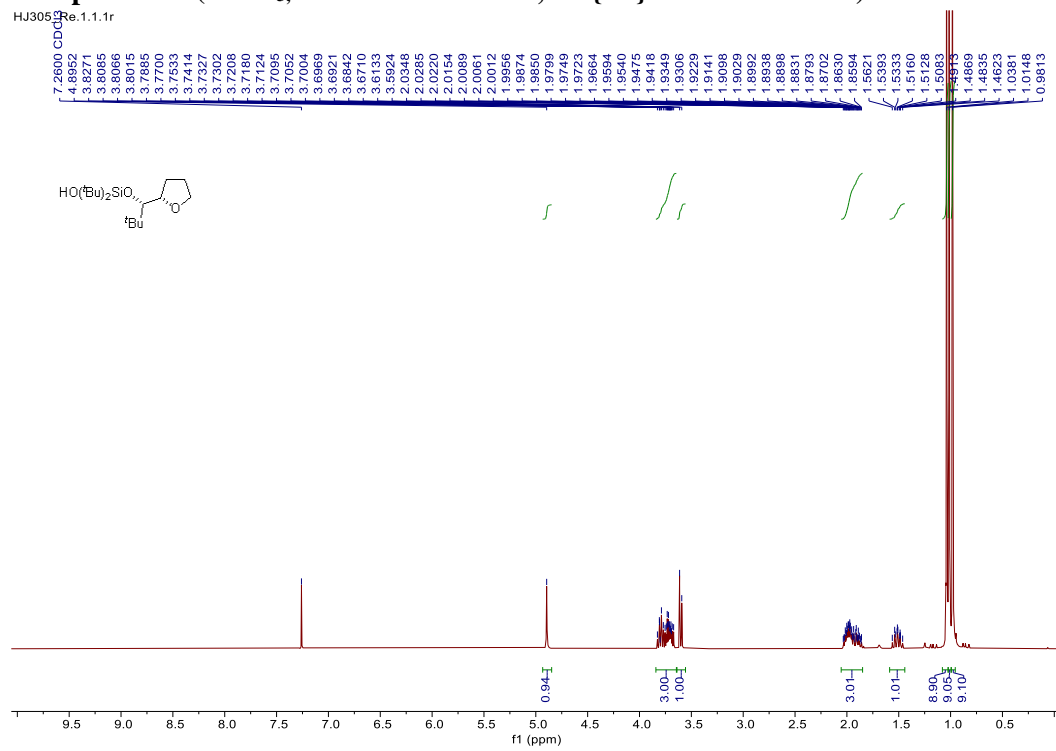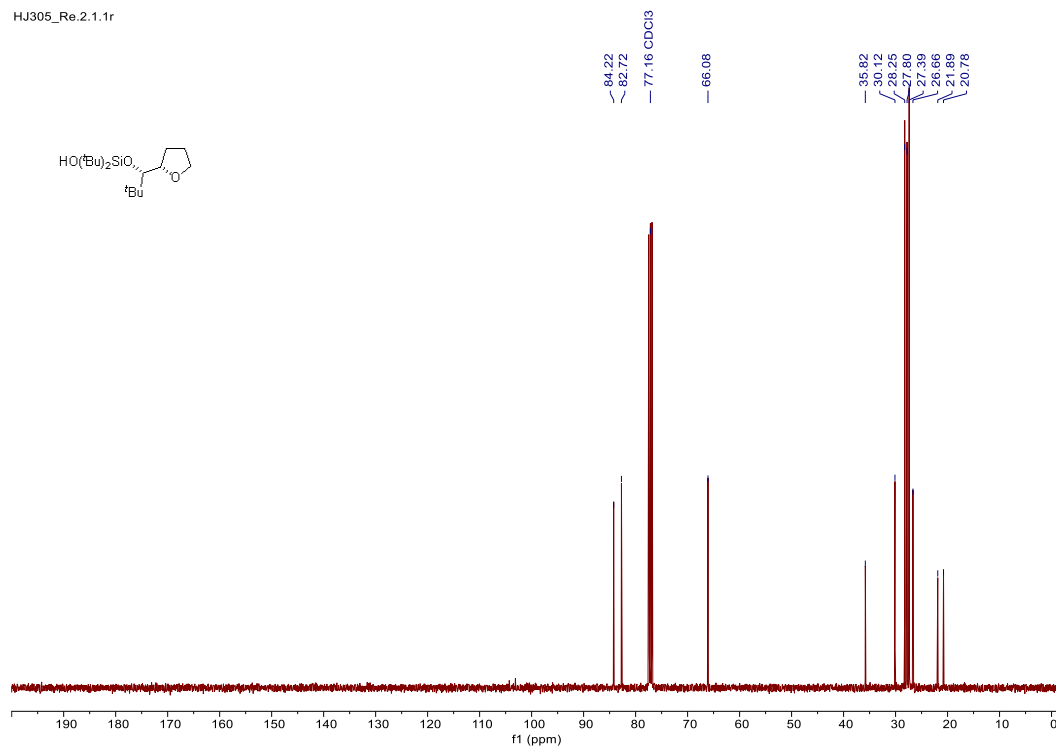

Compound 41 (CDCl<sub>3</sub>, <sup>1</sup>H NMR: 400 MHz, <sup>13</sup>C{<sup>1</sup>H} NMR: 101 MHz)

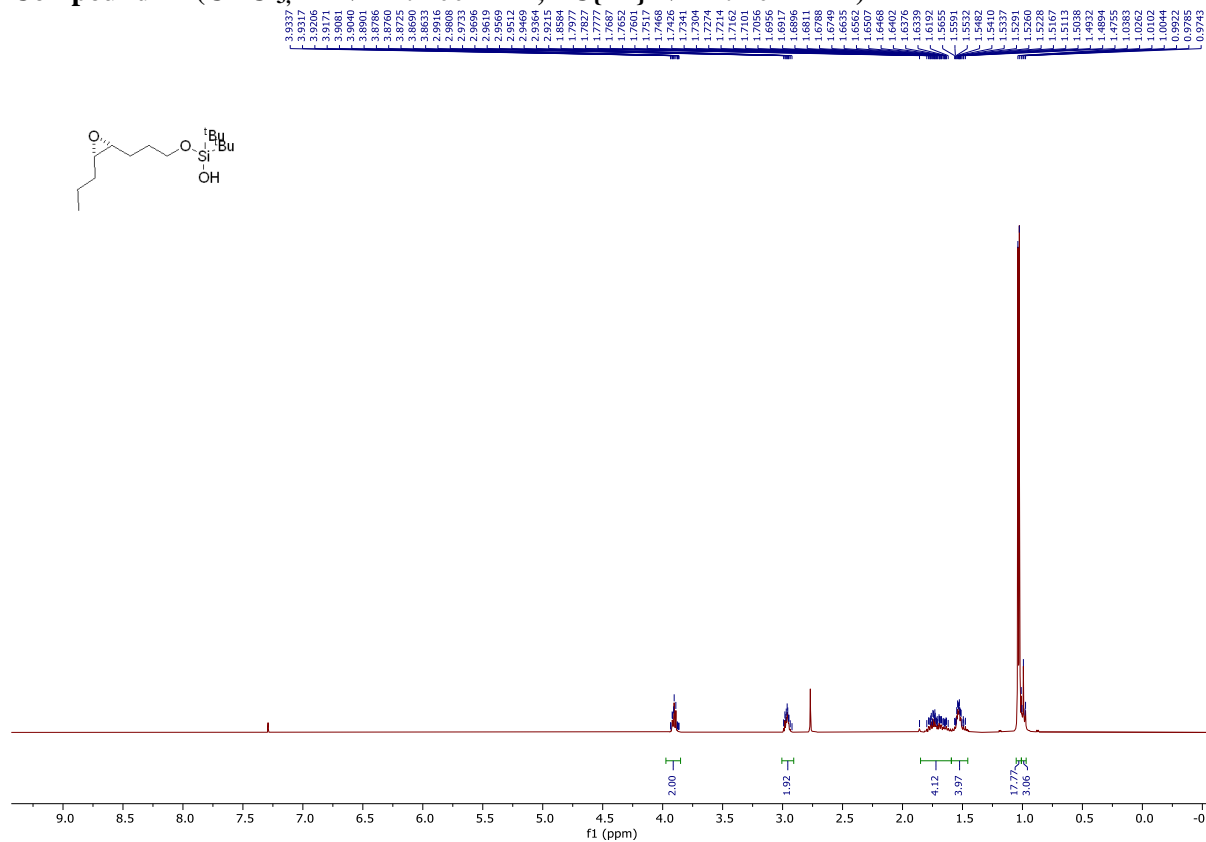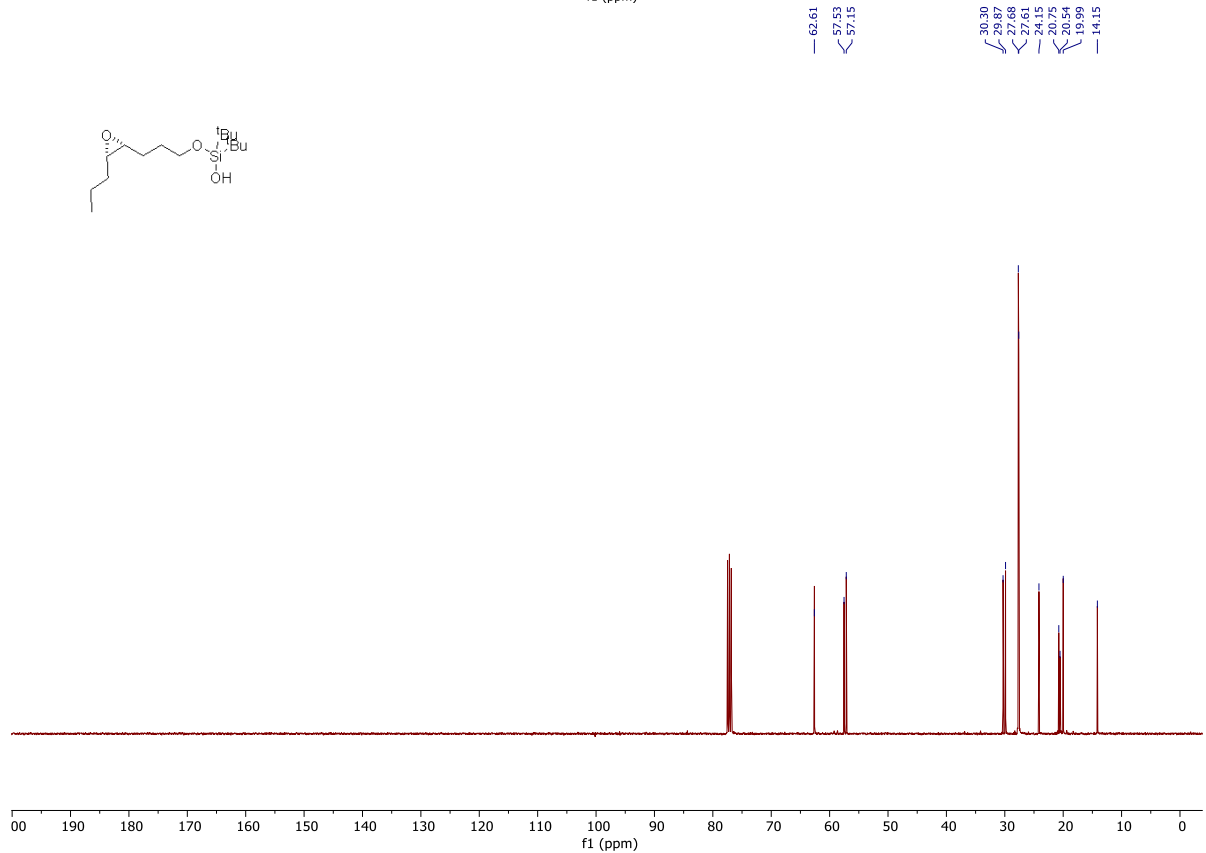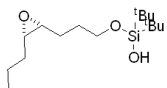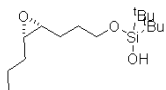

**Compound 42 (CDCl<sub>3</sub>, <sup>1</sup>H NMR: 400 MHz, <sup>13</sup>C{<sup>1</sup>H} NMR: 101 MHz)**

3.8633  
3.8455  
3.8395  
3.8336  
3.8277  
3.8217  
3.8153  
3.8132  
3.8073  
3.8002  
3.7968  
3.7869  
3.7765  
3.7657  
3.7547  
3.6551  
3.6408  
1.9358  
1.9287  
1.9186  
1.9125  
1.9105  
1.8963  
1.8928  
1.8877  
1.8816  
1.8781  
1.8731  
1.8649  
1.8531  
1.8465  
1.8356  
1.8227  
1.8111  
1.7996  
1.7896  
1.7822  
1.7524  
1.7452  
1.7169  
1.5149  
1.5094  
1.5021  
1.4966  
1.4908  
1.4856  
1.4752  
1.4725  
1.4669  
1.4621  
1.4521  
1.4483  
1.4418  
1.4399  
1.4272  
1.4244  
1.4152  
1.4085  
1.4037  
1.3942  
1.3842  
1.3916  
1.3857  
1.3711  
1.3664  
1.3624  
1.3491  
1.3455  
1.3414  
1.3361  
1.0161  
1.0091  
0.9996  
0.9757  
0.9312  
0.9136  
0.8954  
0.8895  
0.8580

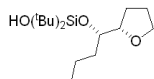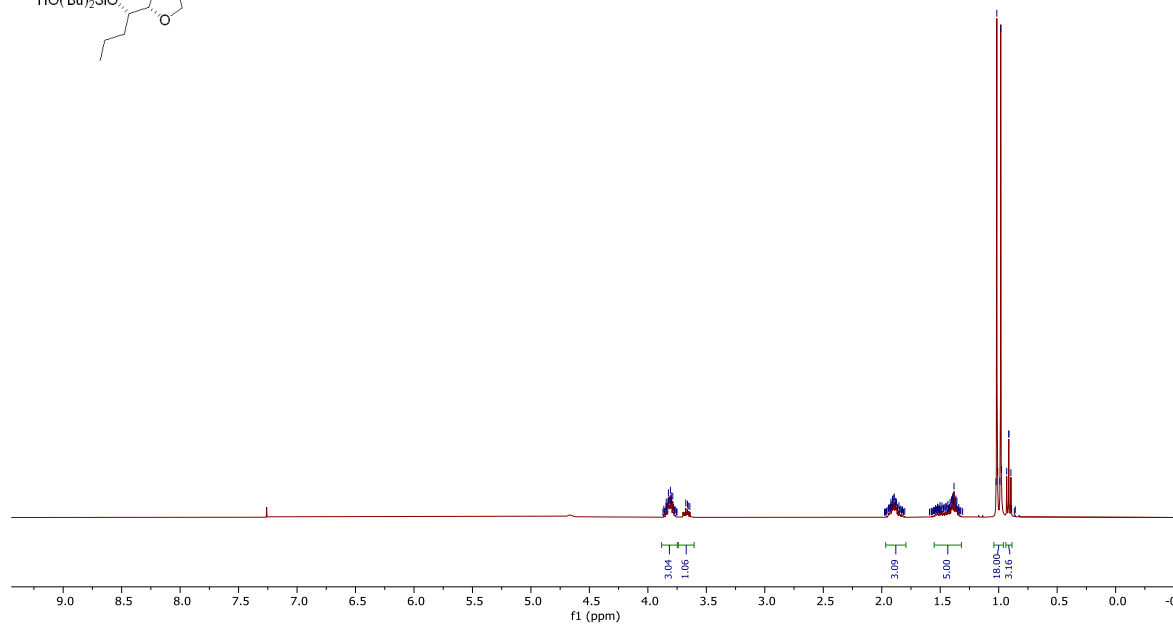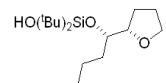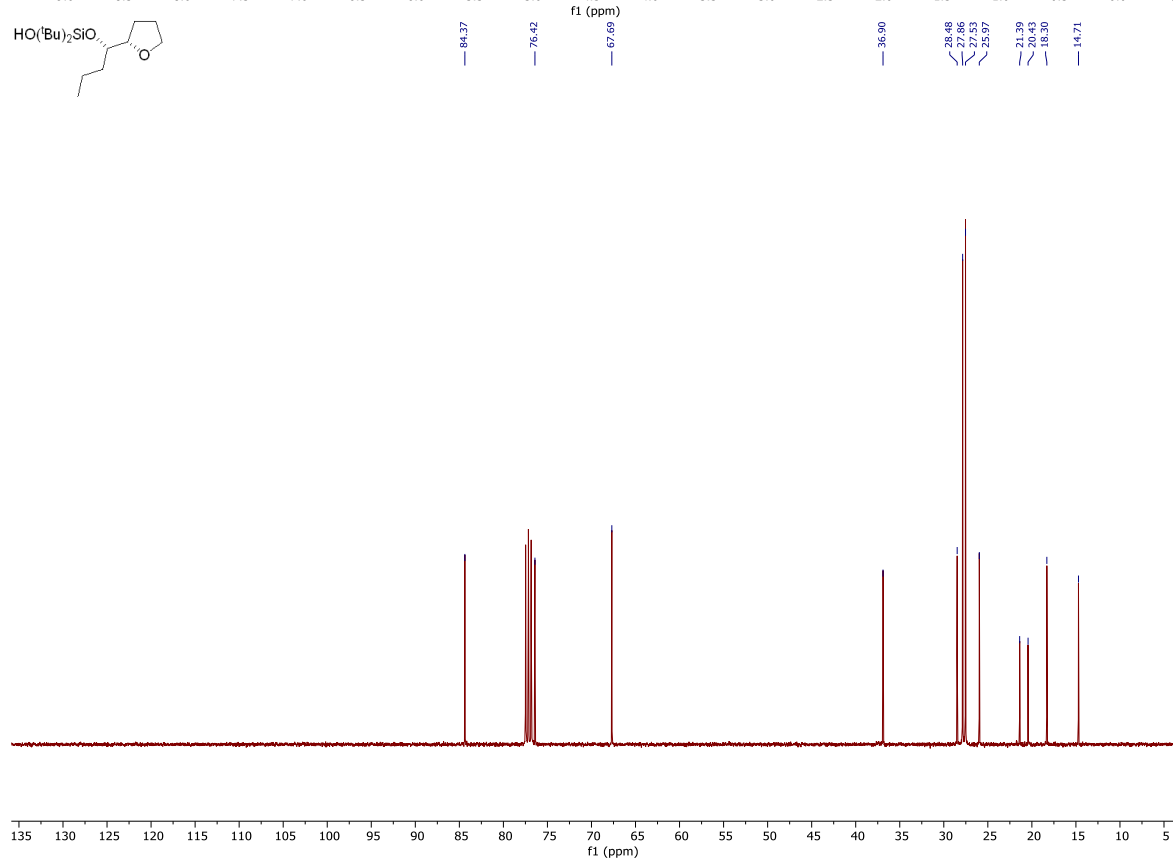



# Compound 43 (CDCl<sub>3</sub>, <sup>1</sup>H NMR: 400 MHz, <sup>13</sup>C{<sup>1</sup>H} NMR: 101 MHz)

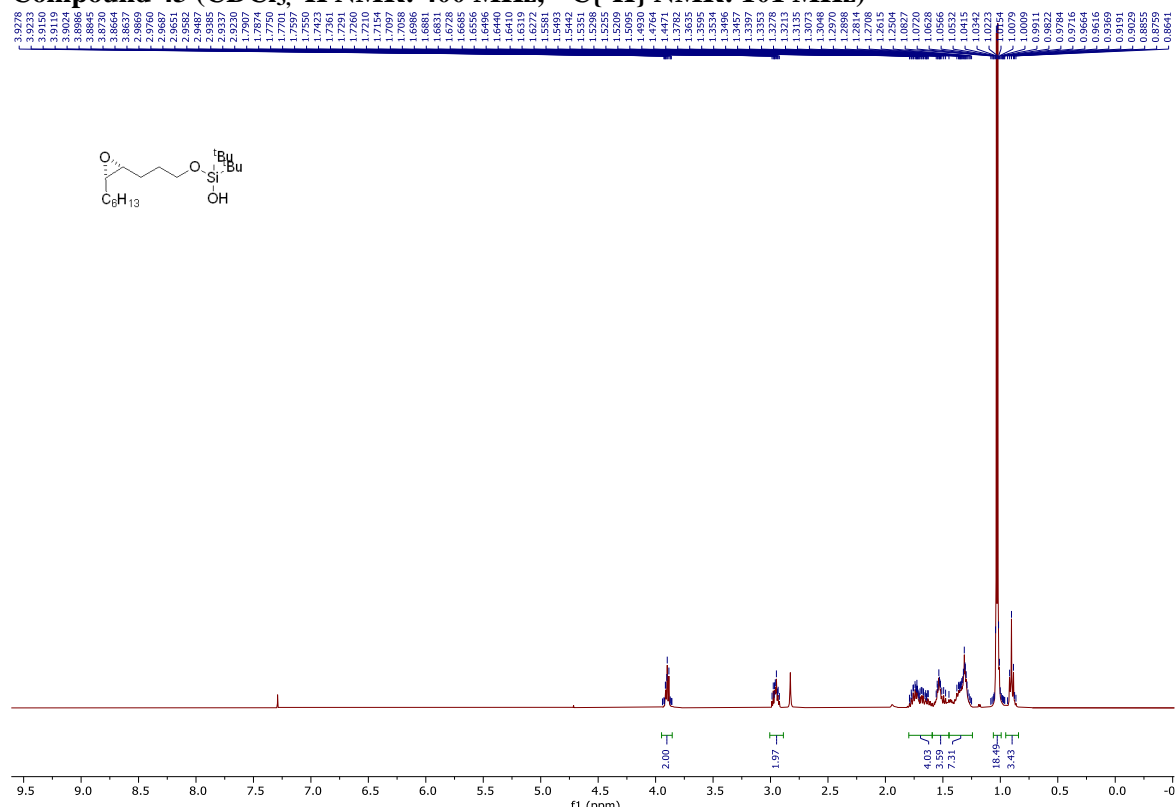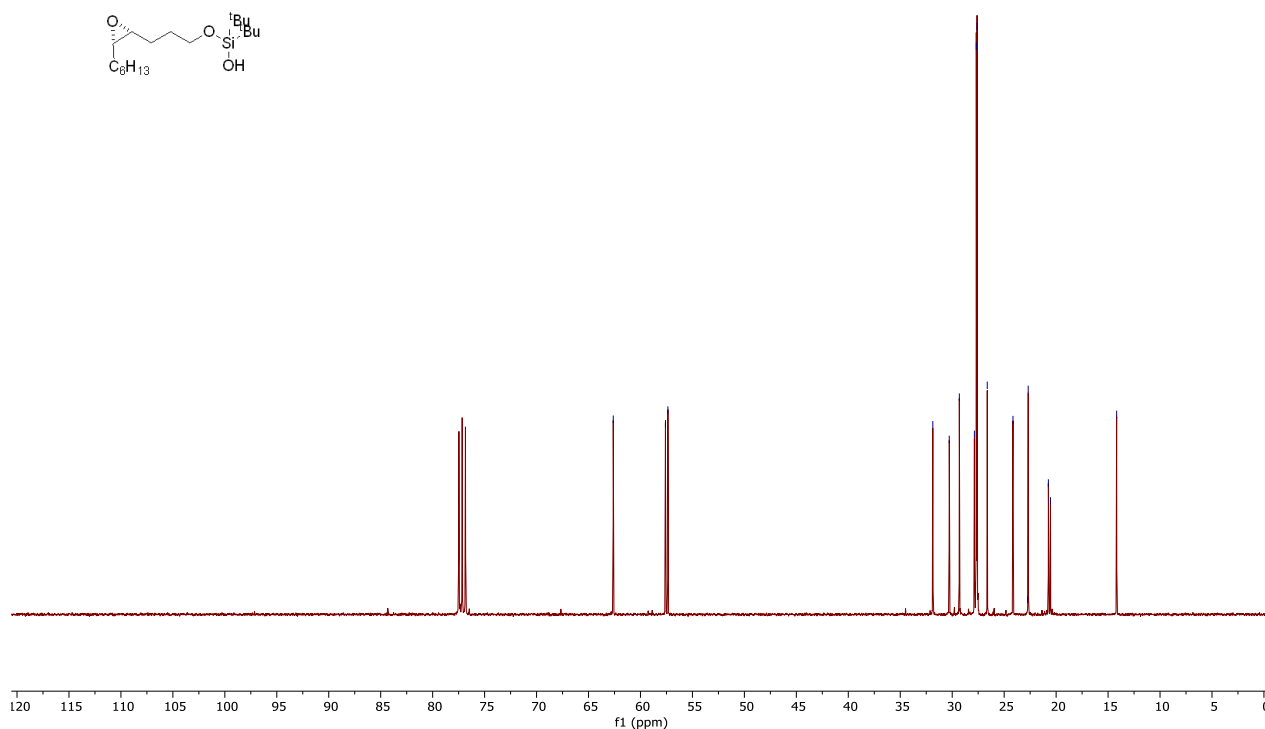

**Compound 44 (CDCl<sub>3</sub>, <sup>1</sup>H NMR: 400 MHz, <sup>13</sup>C{<sup>1</sup>H} NMR: 101 MHz)**

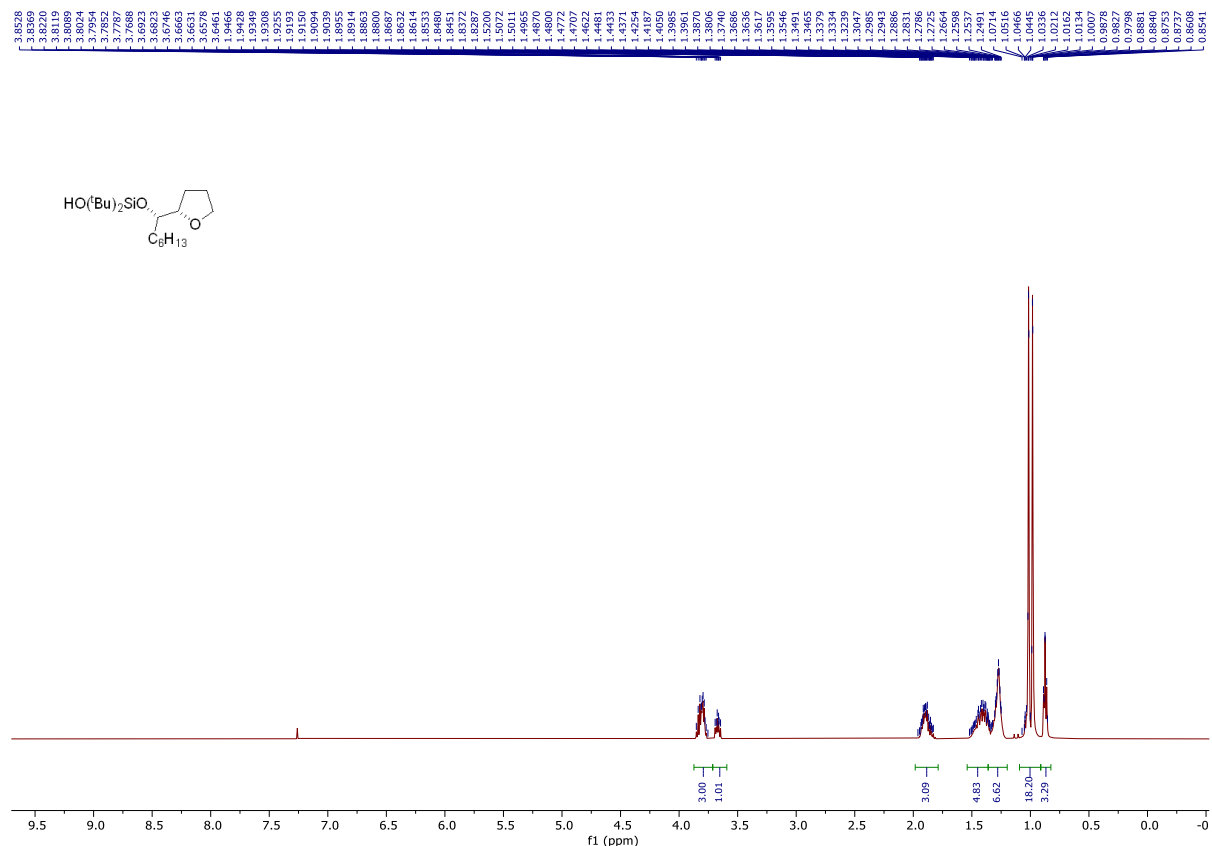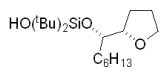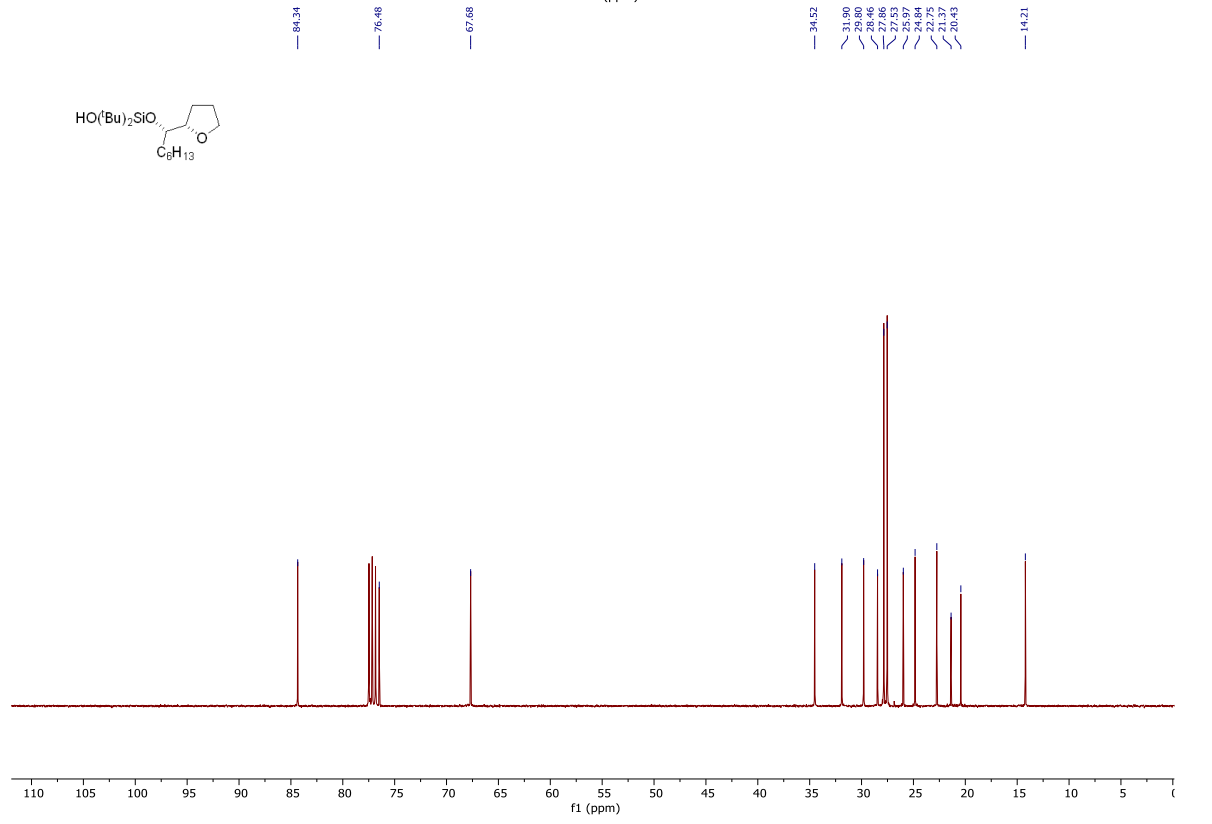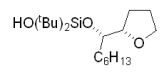

Compound 45 (CDCl<sub>3</sub>, <sup>1</sup>H NMR: 400 MHz, <sup>13</sup>C{<sup>1</sup>H} NMR: 101 MHz)

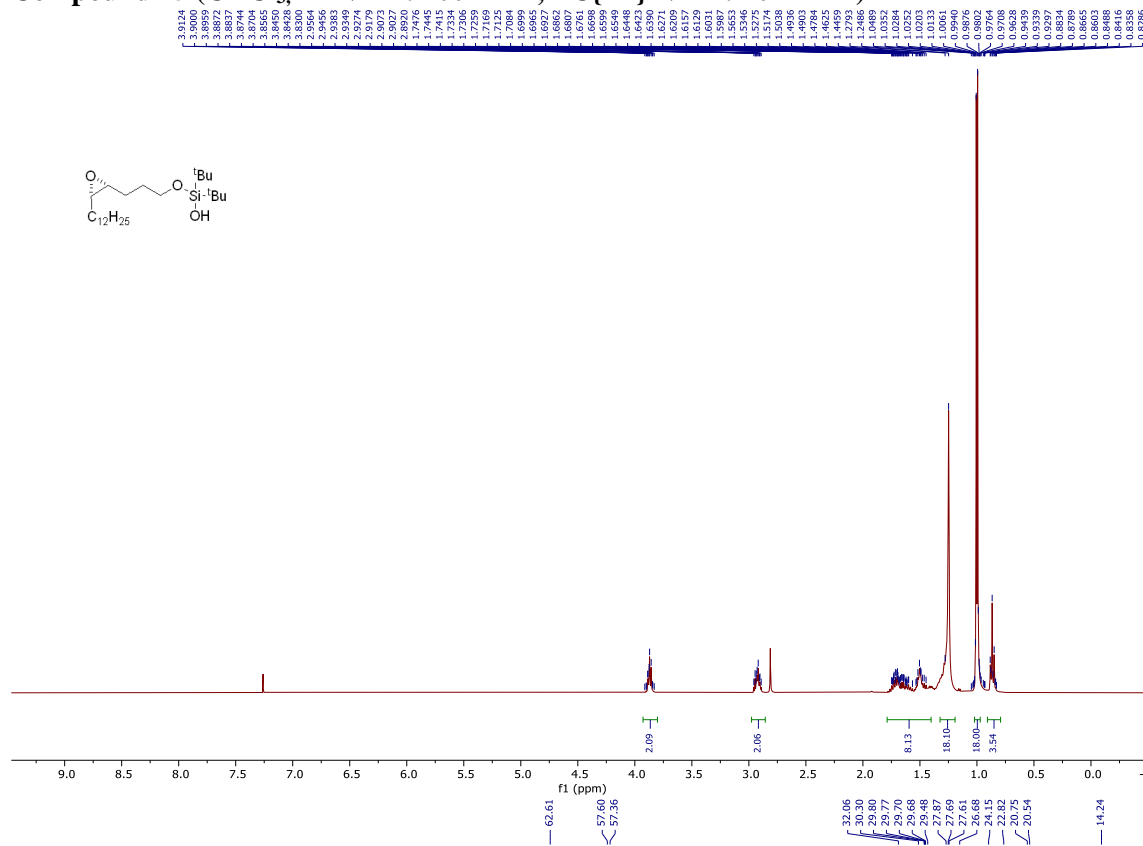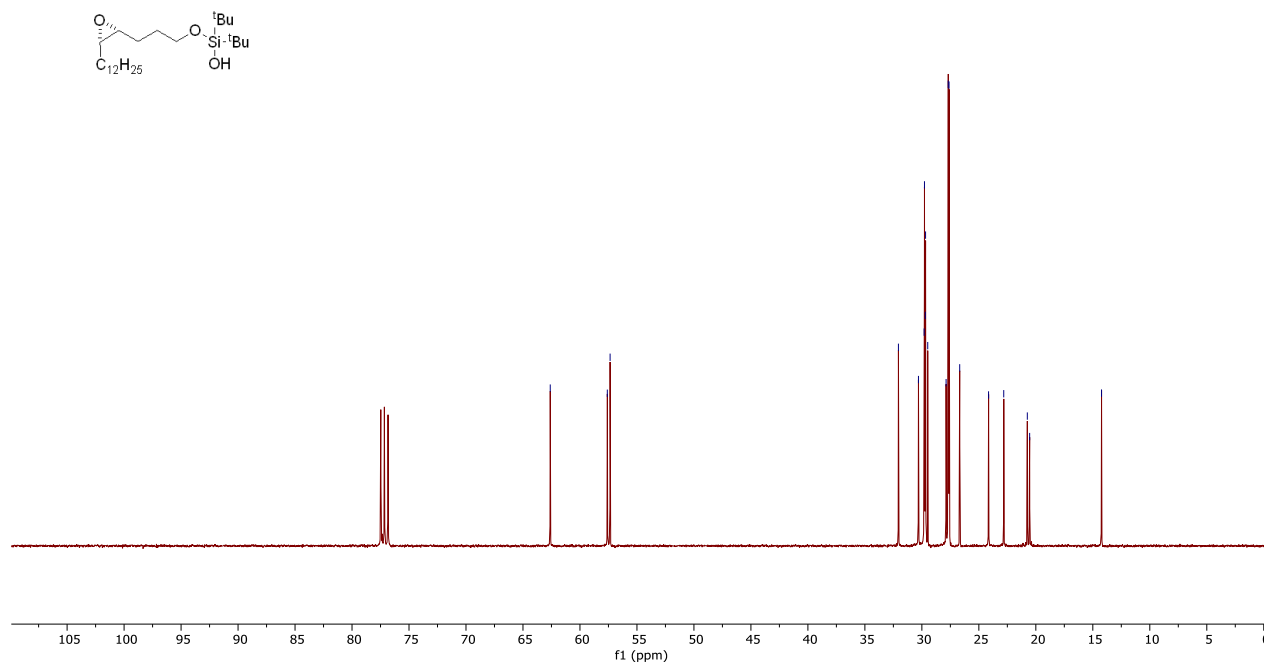

**Compound 46 (CDCl<sub>3</sub>, <sup>1</sup>H NMR: 400 MHz, <sup>13</sup>C{<sup>1</sup>H} NMR: 101 MHz)**

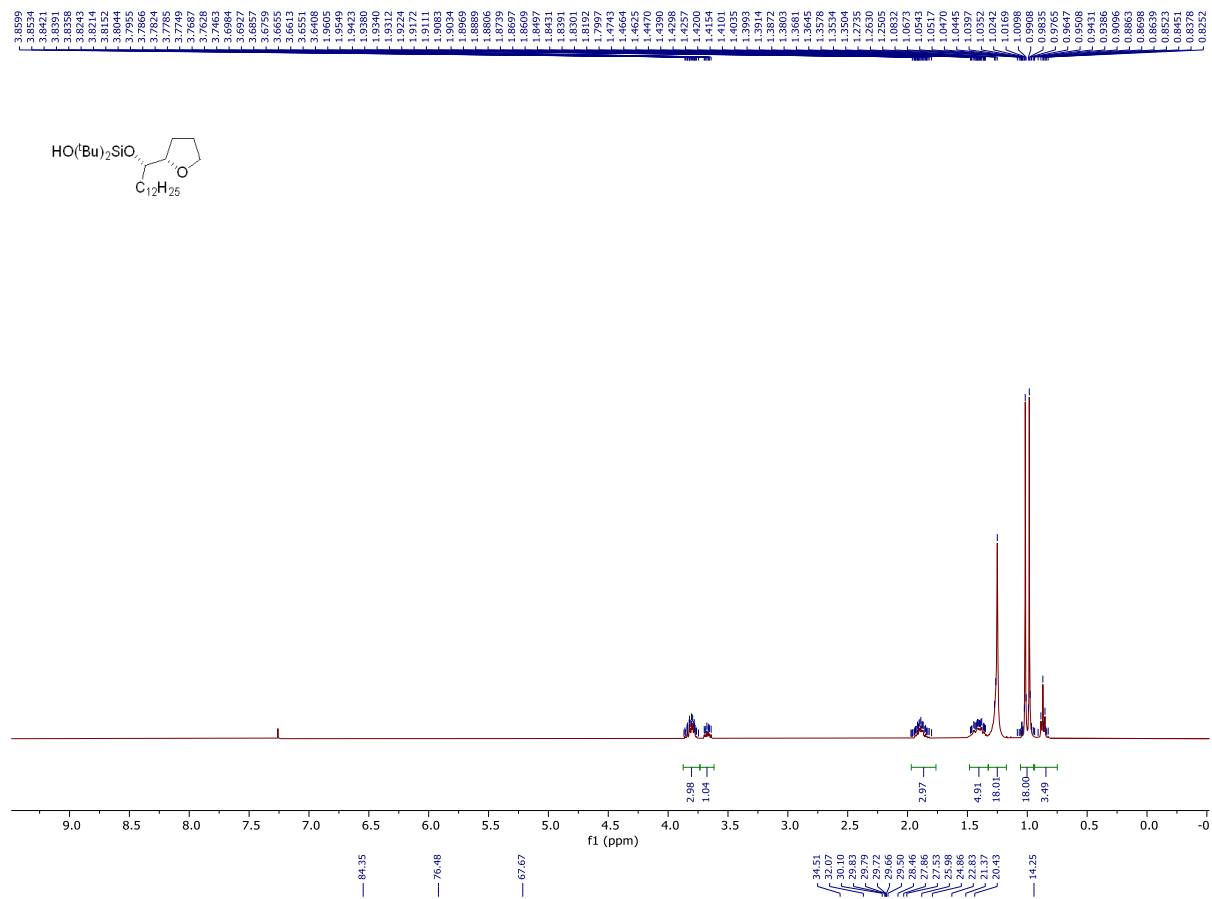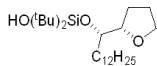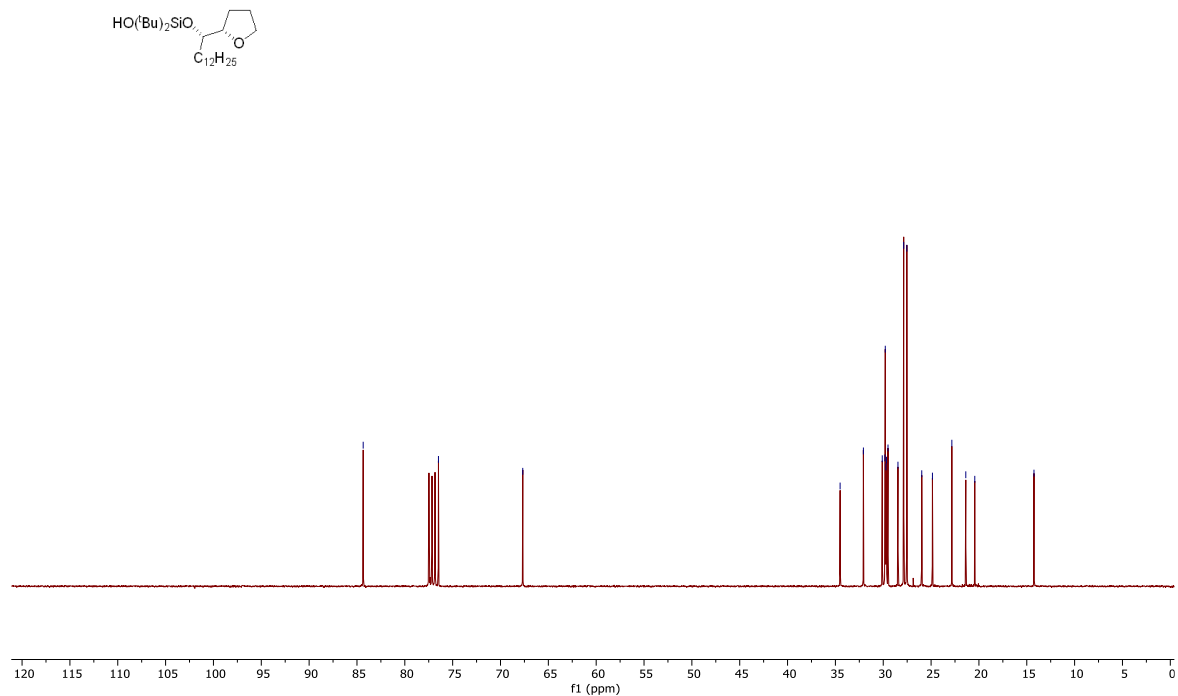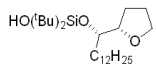

**Compound 47 (CDCl<sub>3</sub>, <sup>1</sup>H NMR: 400 MHz, <sup>13</sup>C{<sup>1</sup>H} NMR: 101 MHz)**

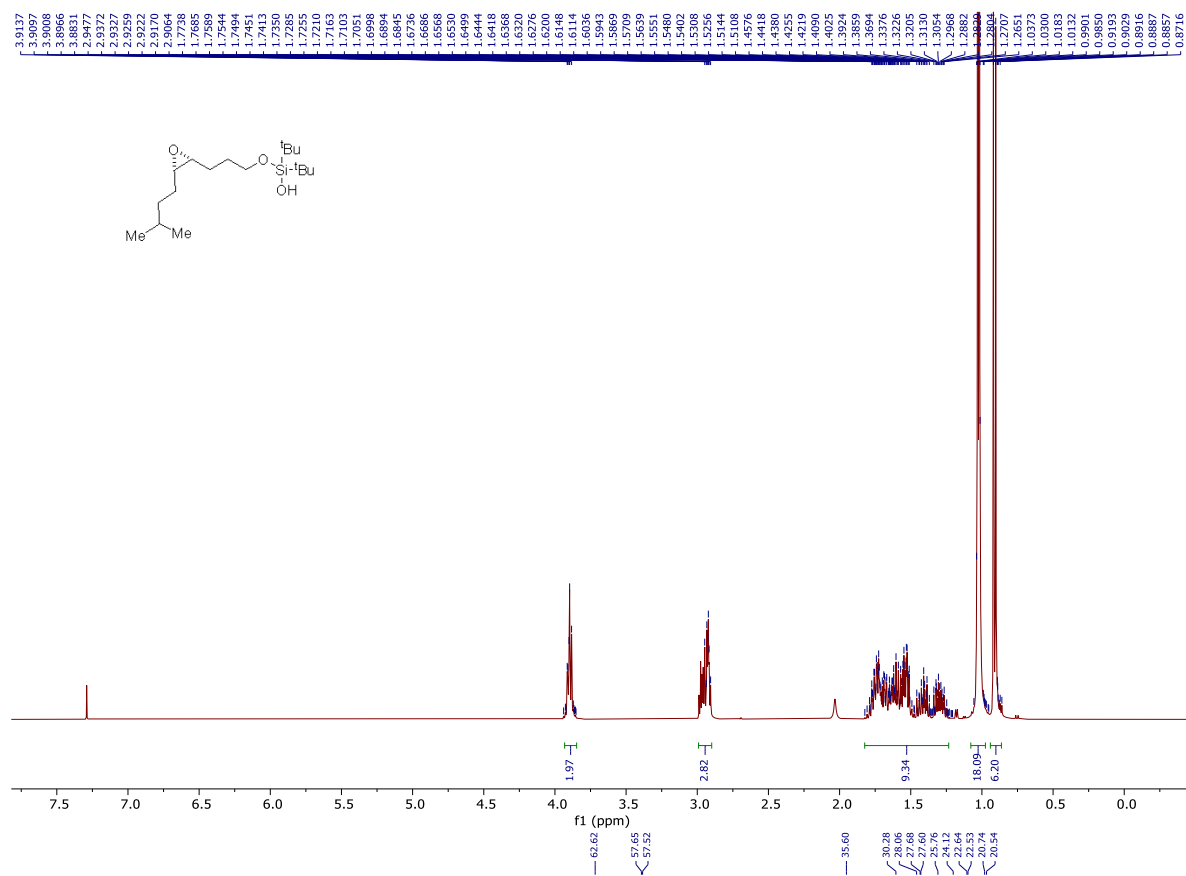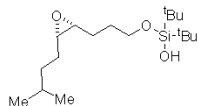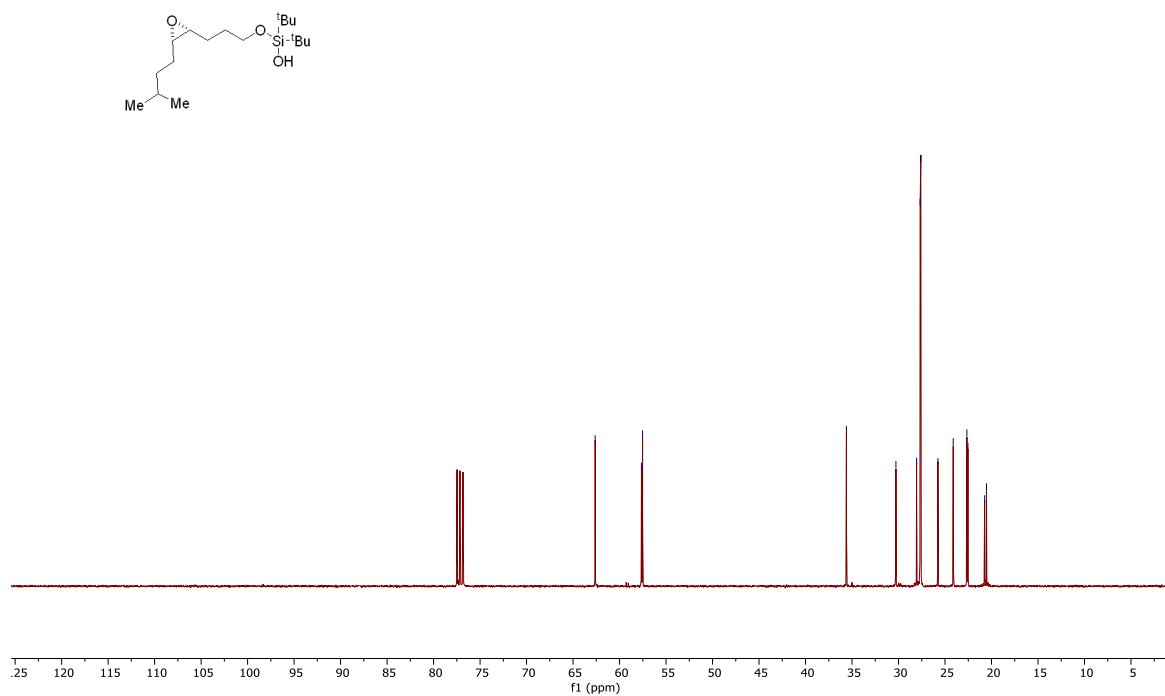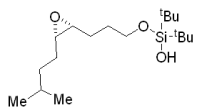

**Compound 48 (CDCl<sub>3</sub>, <sup>1</sup>H NMR: 400 MHz, <sup>13</sup>C{<sup>1</sup>H} NMR: 101 MHz)**

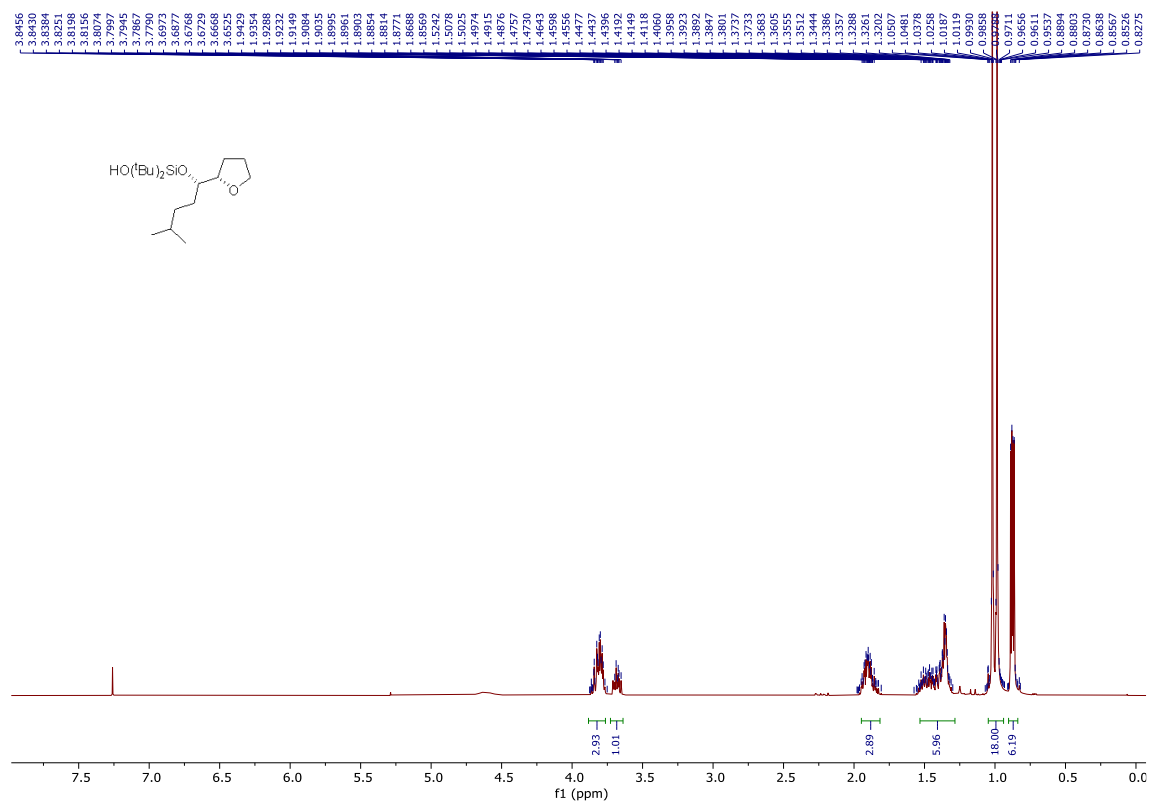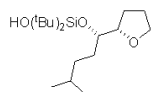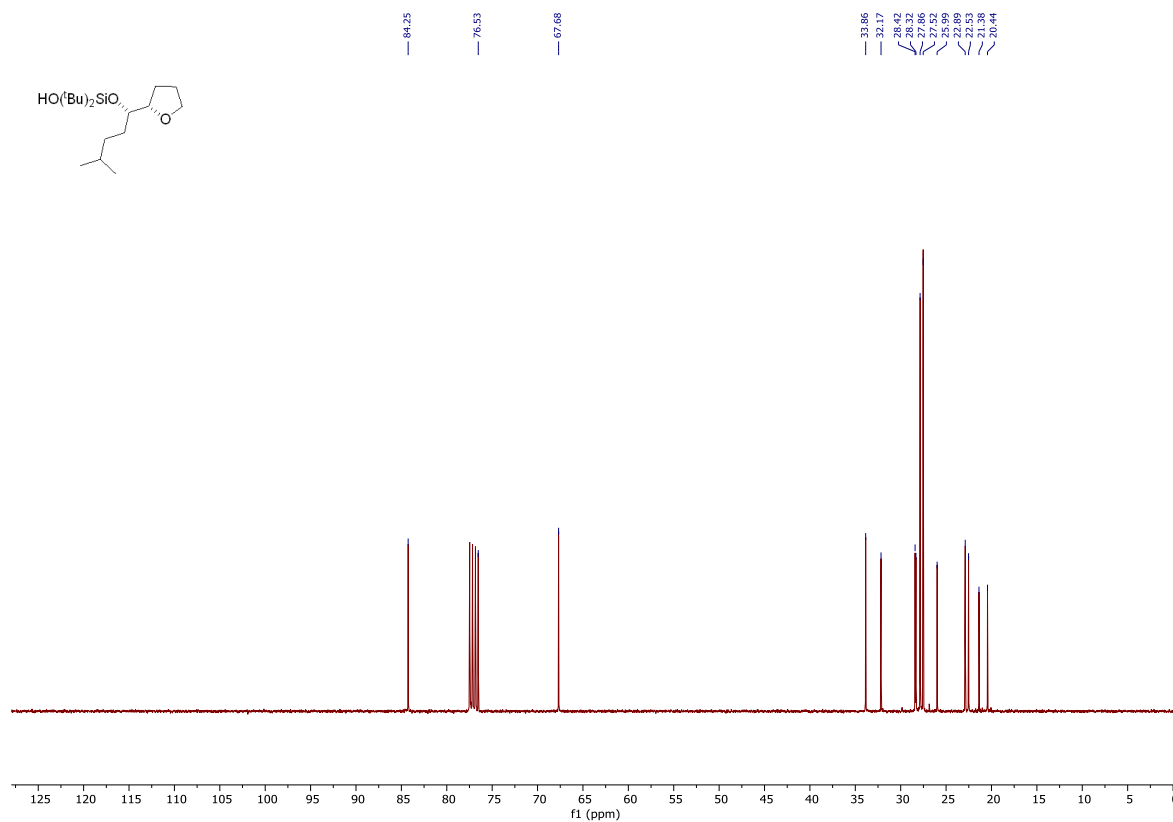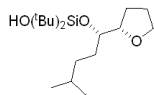

**Compound 49 (CDCl<sub>3</sub>, <sup>1</sup>H NMR: 400 MHz, <sup>13</sup>C{<sup>1</sup>H} NMR: 101 MHz)**

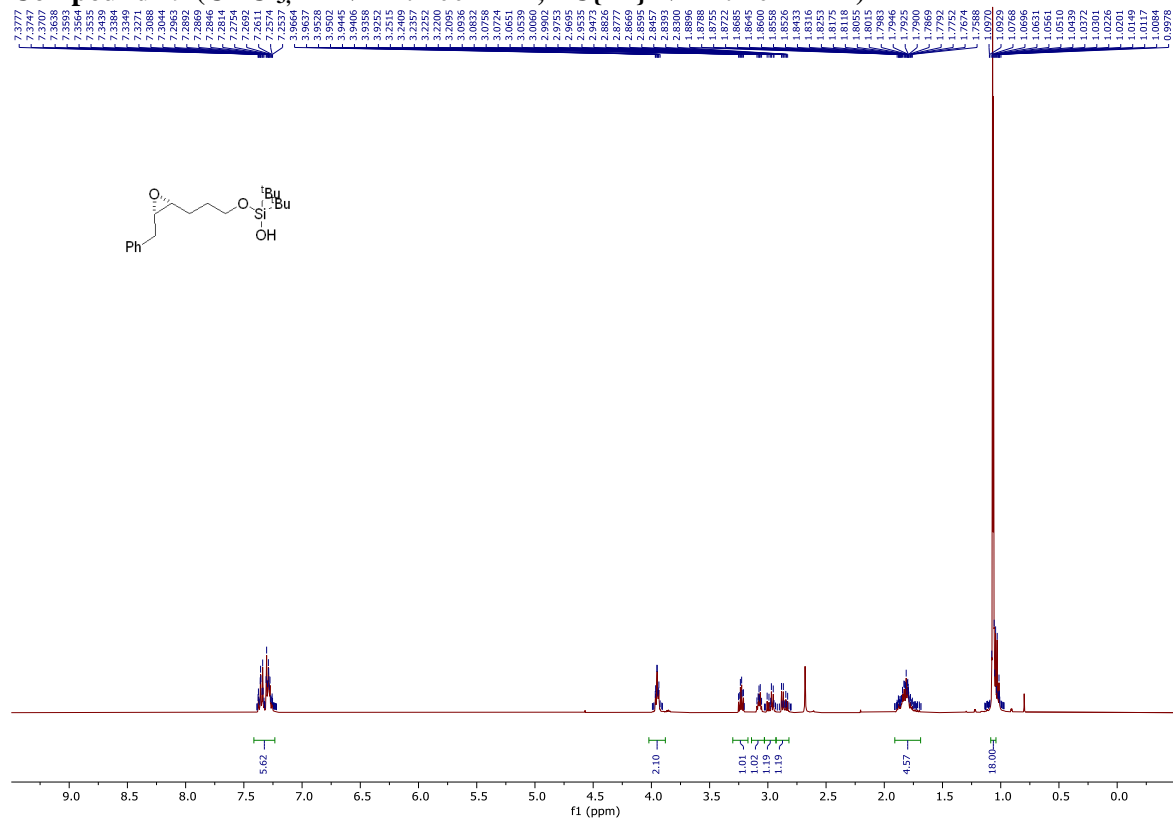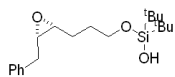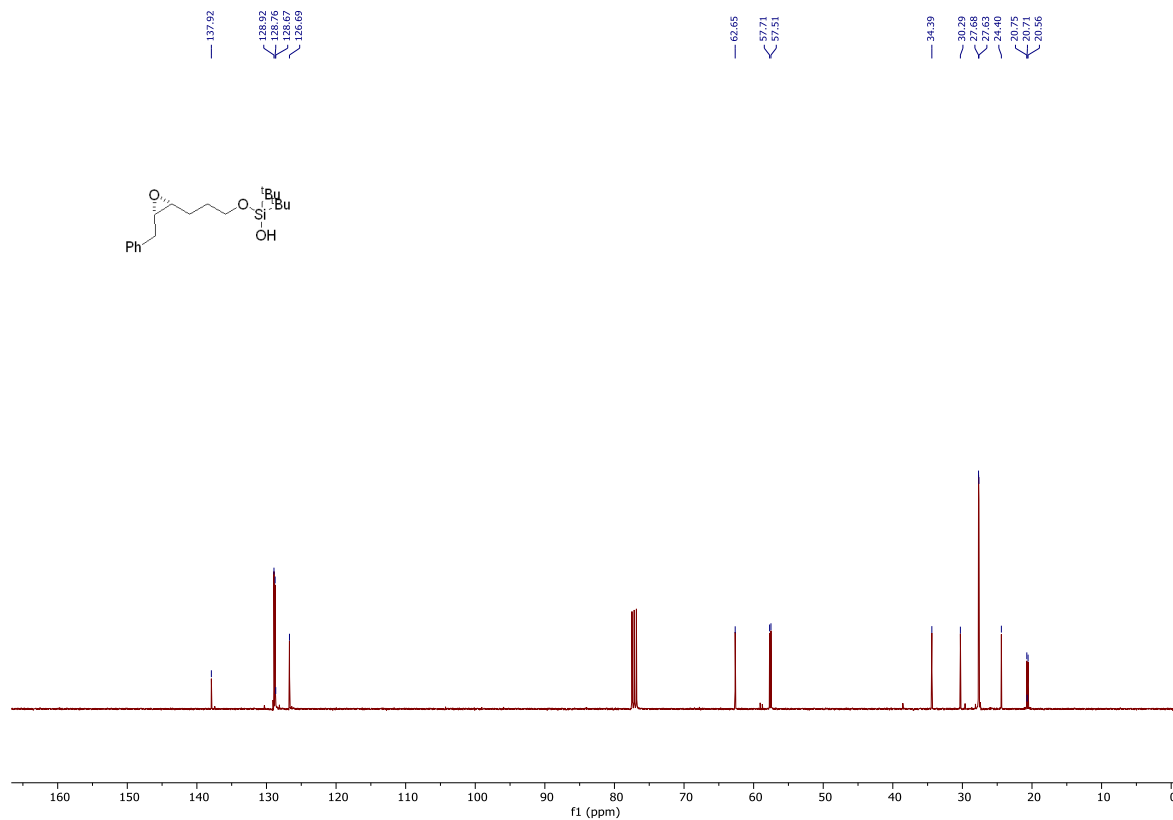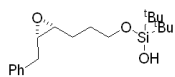

**Compound 50 (CDCl<sub>3</sub>, <sup>1</sup>H NMR: 400 MHz, <sup>13</sup>C{<sup>1</sup>H} NMR: 101 MHz)**

7.2474, 7.2452, 7.2260, 7.2215, 7.2188, 7.2091, 7.2045, 7.2017, 7.1888, 4.0622, 4.0537, 4.0335, 4.0220, 4.0136, 3.8880, 3.8851, 3.8674, 3.8356, 3.8231, 3.8156, 3.8052, 3.7923, 3.7837, 3.7169, 3.6952, 3.6926, 3.6934, 3.6817, 3.6771, 3.6731, 3.6580, 2.8845, 2.8698, 2.8423, 2.6416, 2.6252, 2.5878, 2.0443, 2.0413, 2.0283, 2.0214, 2.0161, 2.0034, 1.9989, 1.9915, 1.9790, 1.9742, 1.9702, 1.9658, 1.9618, 1.9568, 1.9525, 1.9444, 1.9395, 1.9365, 1.9168, 1.9138, 1.9061, 1.8997, 1.8933, 1.8638, 1.8572, 1.5577, 1.5419, 1.5385, 1.5192, 1.5122, 0.9988, 0.9843, 0.9779, 0.9647, 0.9510, 0.7744, 0.7672, 0.7547, 0.7482, 0.7432, 0.7246

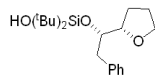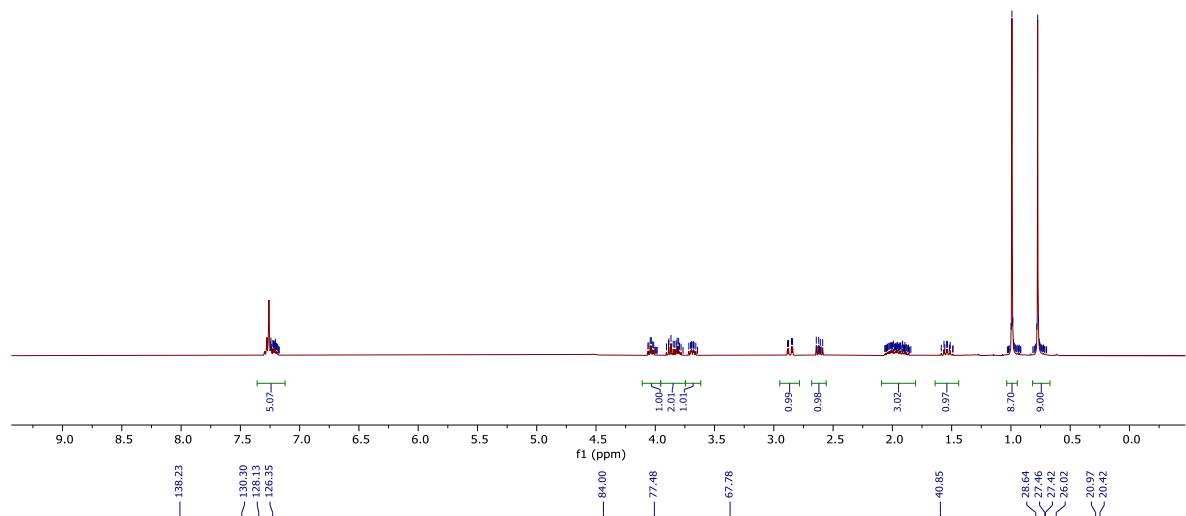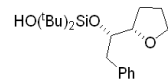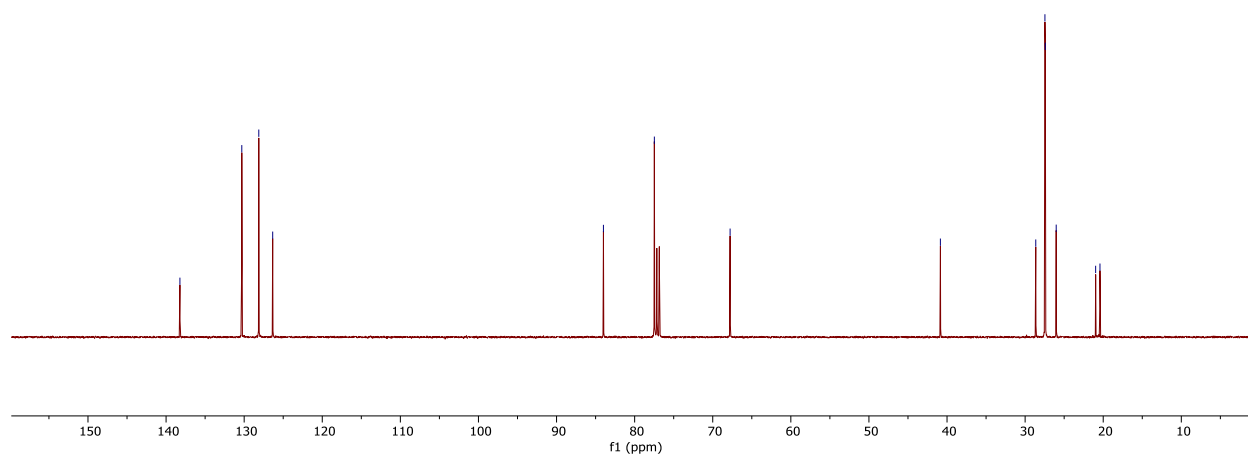



**Compound 51 (CDCl<sub>3</sub>, <sup>1</sup>H NMR: 400 MHz, <sup>13</sup>C{<sup>1</sup>H} NMR: 101 MHz)**

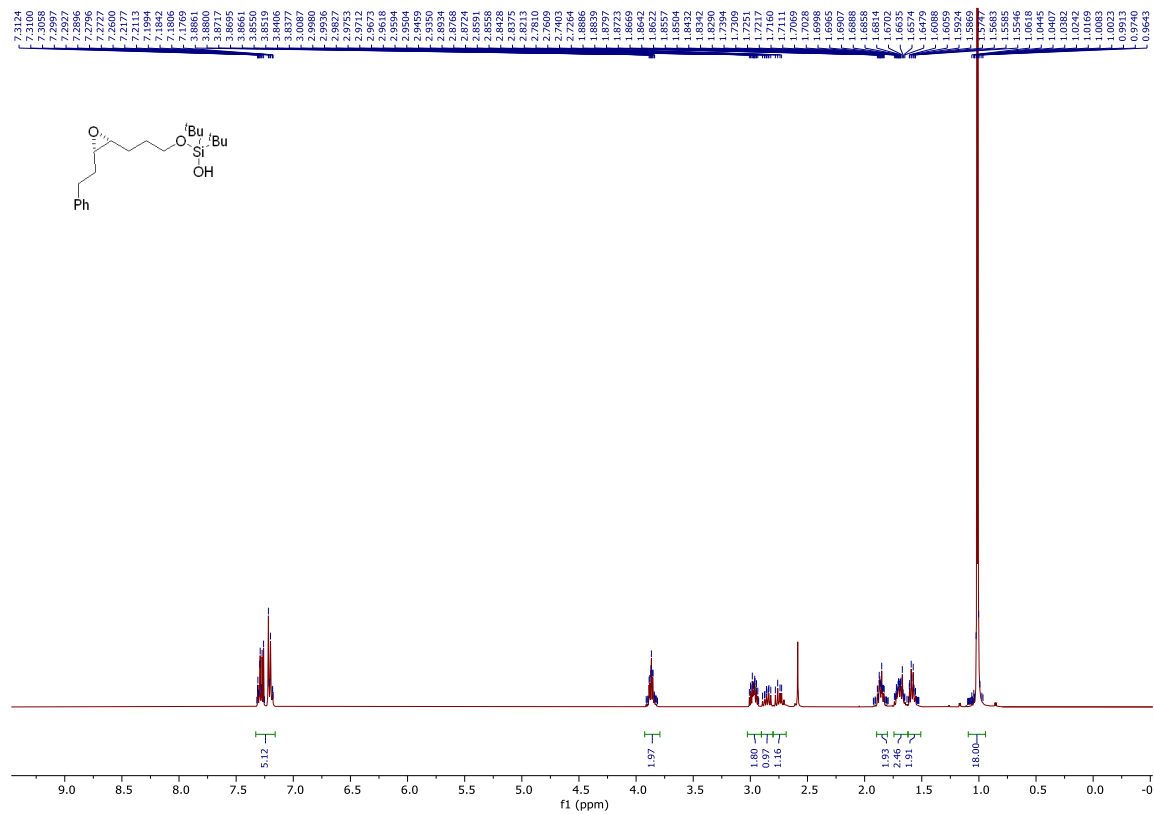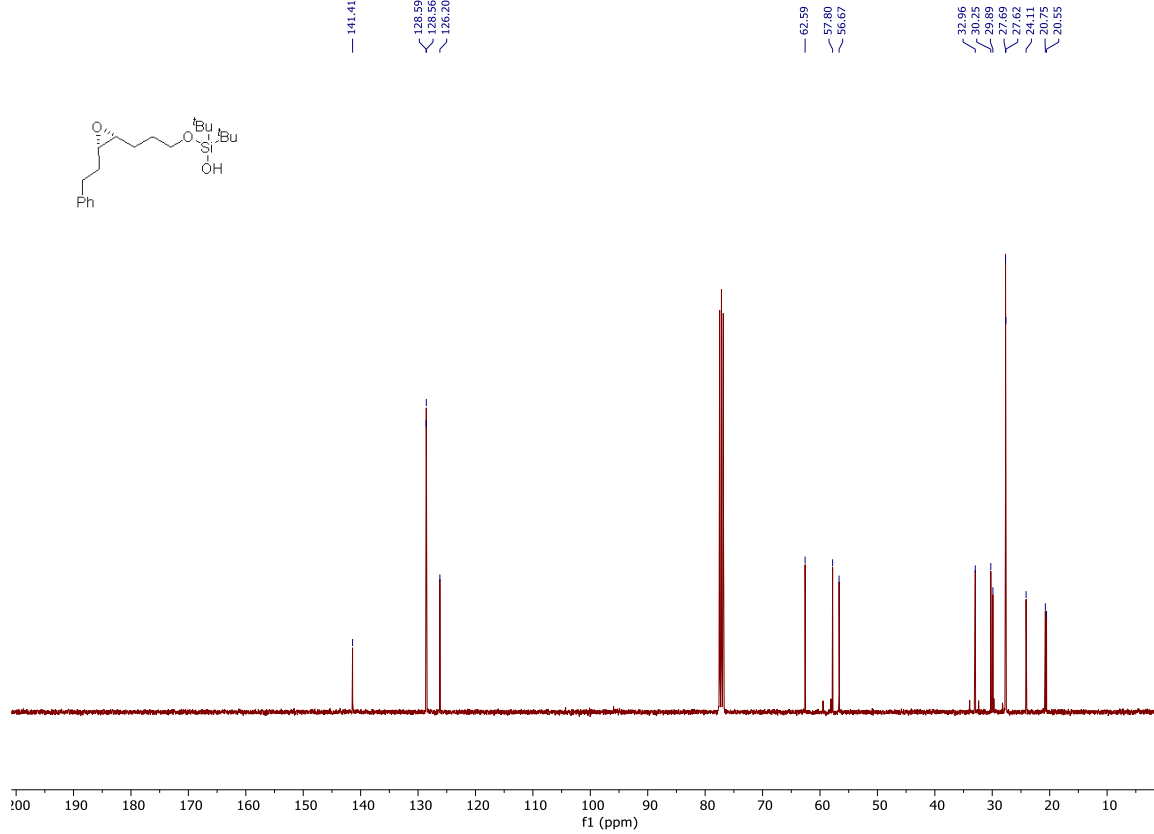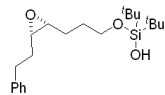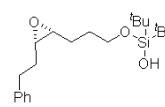

**Compound 52 (CDCl<sub>3</sub>, <sup>1</sup>H NMR: 400 MHz, <sup>13</sup>C{<sup>1</sup>H} NMR: 101 MHz)**

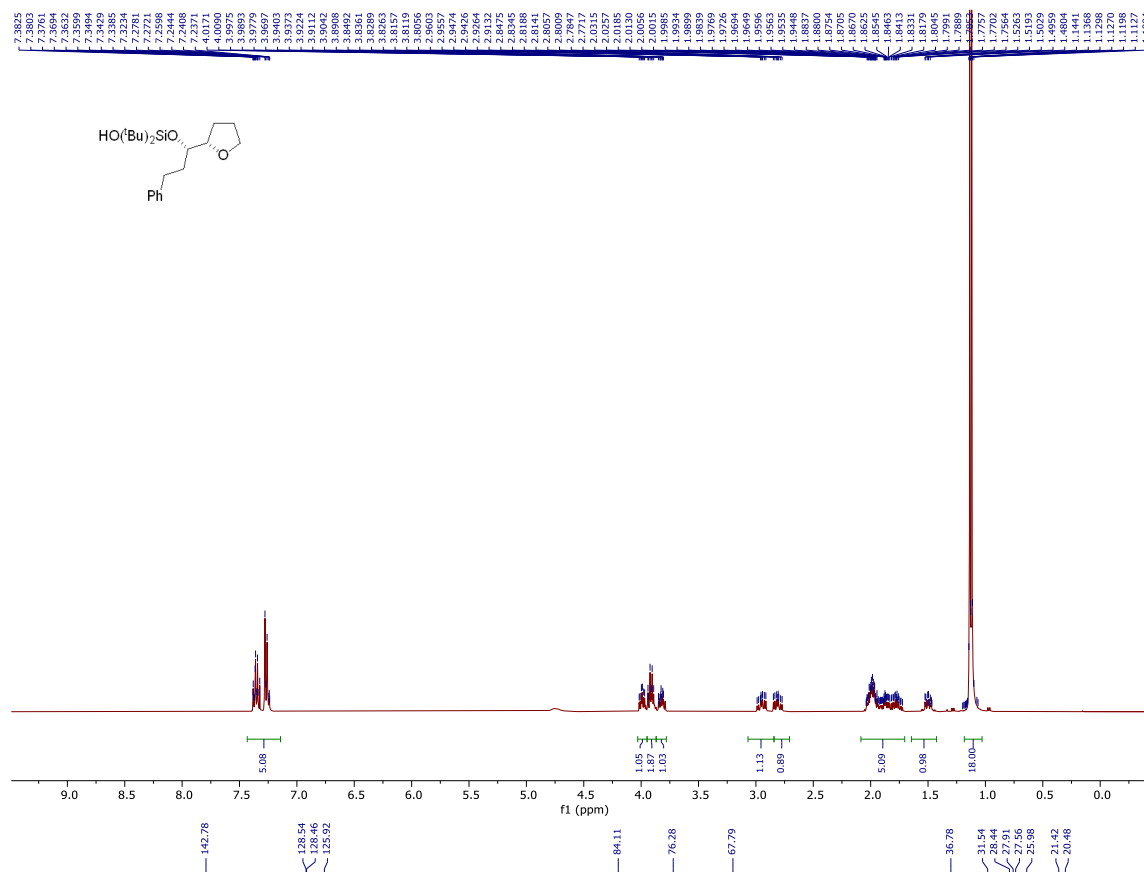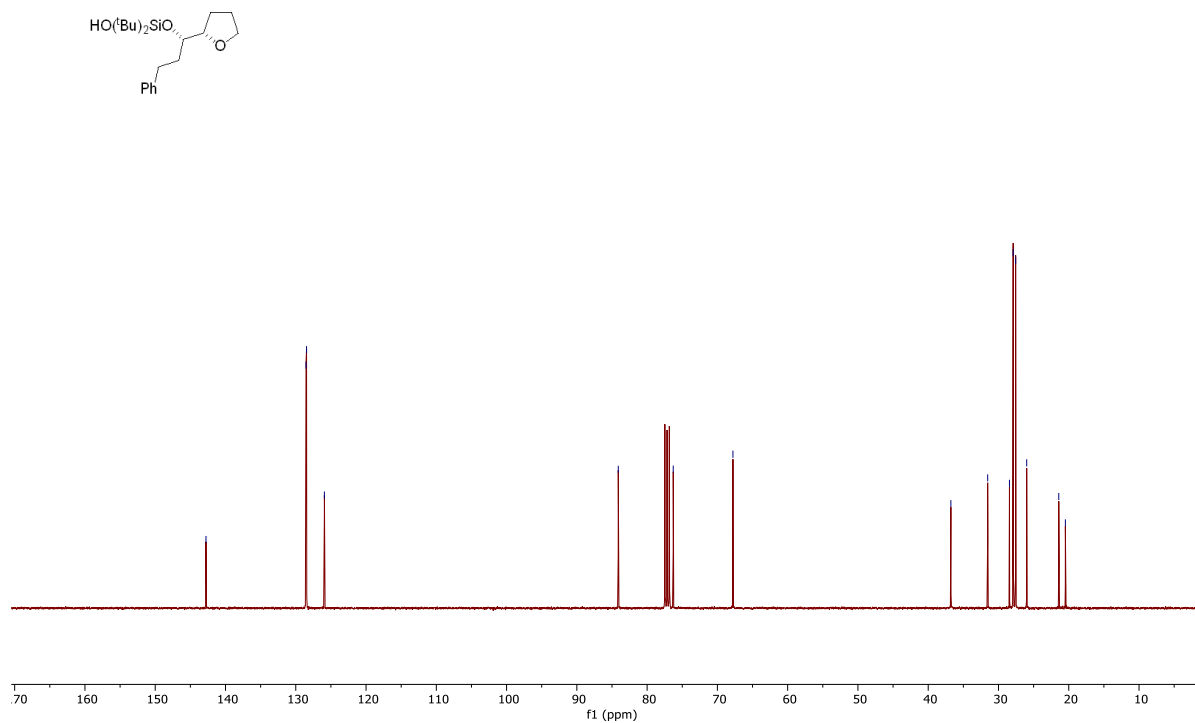

**Compound 53 (CDCl<sub>3</sub>, <sup>1</sup>H NMR: 400 MHz, <sup>13</sup>C{<sup>1</sup>H} NMR: 101 MHz)**

3.8818 3.8701 3.8563 3.8425 3.8277 3.8199 3.5302 3.5163 3.5044 3.4905 3.4827 3.4554 3.4419 3.4296 3.4160 3.4117 3.4084 3.0954 3.0847 3.0817 3.0710 3.0574 3.0168 3.0038 2.9999 2.9929 2.9817 1.7778 1.7558 1.7520 1.7457 1.7407 1.7370 1.7343 1.7200 1.7202 1.7156 1.7089 1.7061 1.6956 1.6959 1.6889 1.6889 1.6835 1.6719 1.6675 1.6579 1.6509 1.6457 1.6424 1.6390 1.6288 1.6288 1.6171 1.6166 1.6111 1.6069 1.6045 1.6045 1.5928 1.5894 1.5832 1.5797 1.5738 1.5623 1.5551 1.5551 1.2095 1.2095 1.1804 1.1804 1.1460 1.1438 1.0438 1.0355 1.0284 1.0284 1.0074 1.0074 1.0010 0.9939 0.9854 0.9854 0.9784 0.9784 0.9681 0.9681 0.9511 0.9511 0.9434 0.9434 0.9353 0.9263 0.9263 0.9018 0.9018 0.8949 0.8949

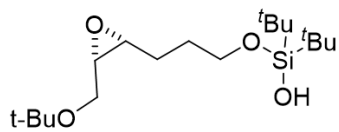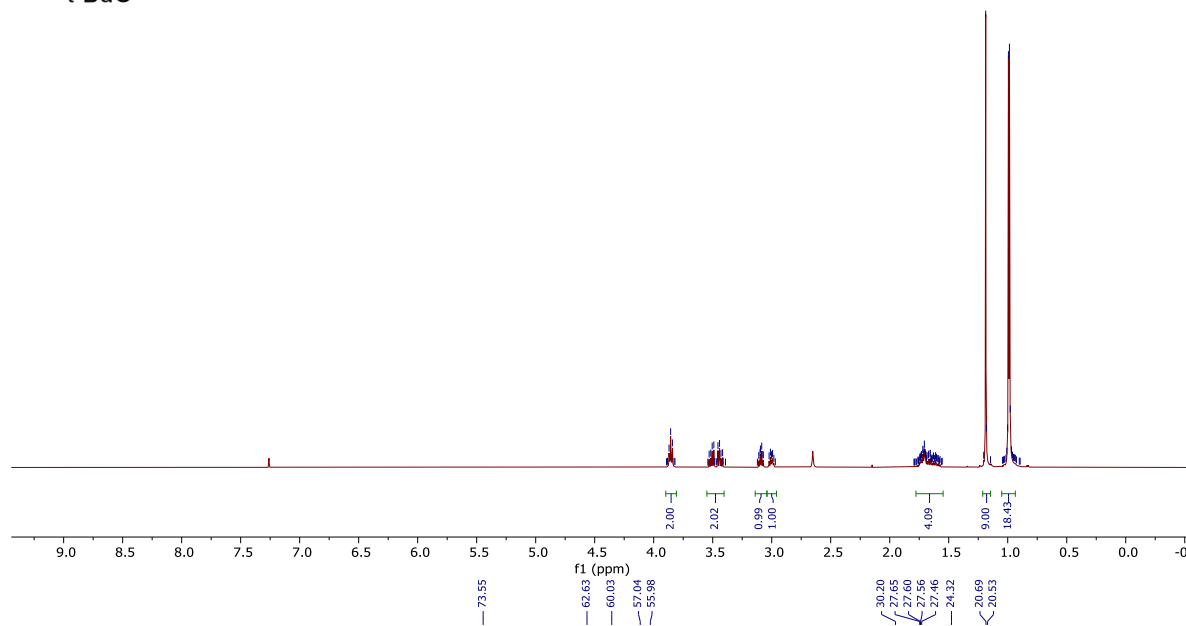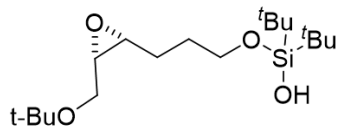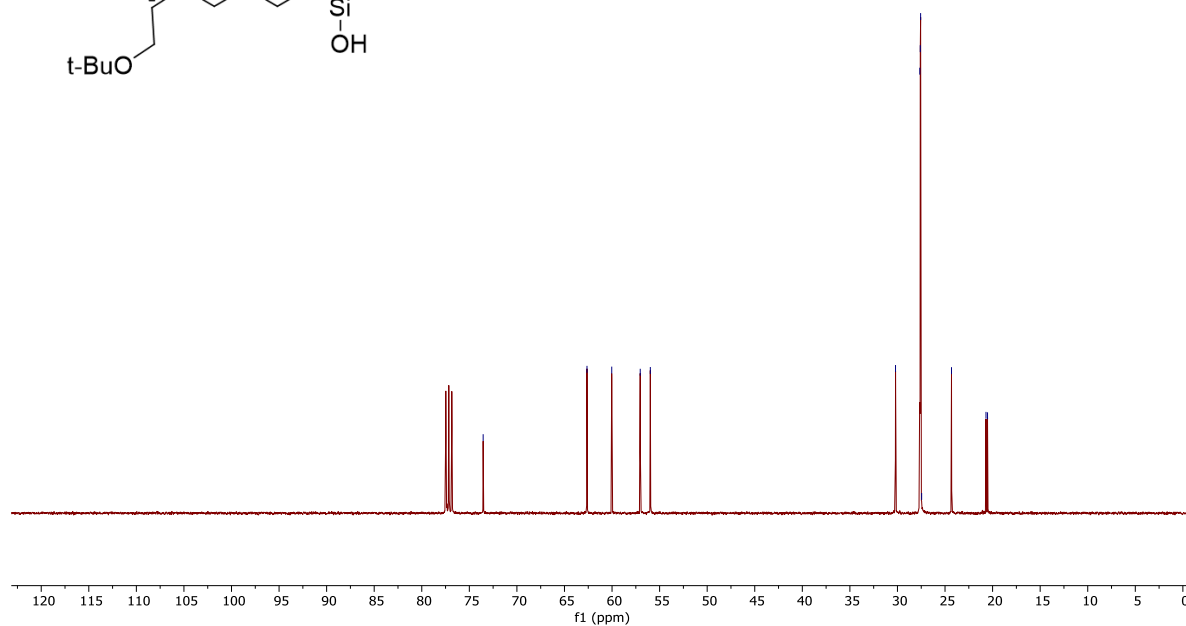

**Compound 54 (CDCl<sub>3</sub>, <sup>1</sup>H NMR: 400 MHz, <sup>13</sup>C{<sup>1</sup>H} NMR: 101 MHz)**

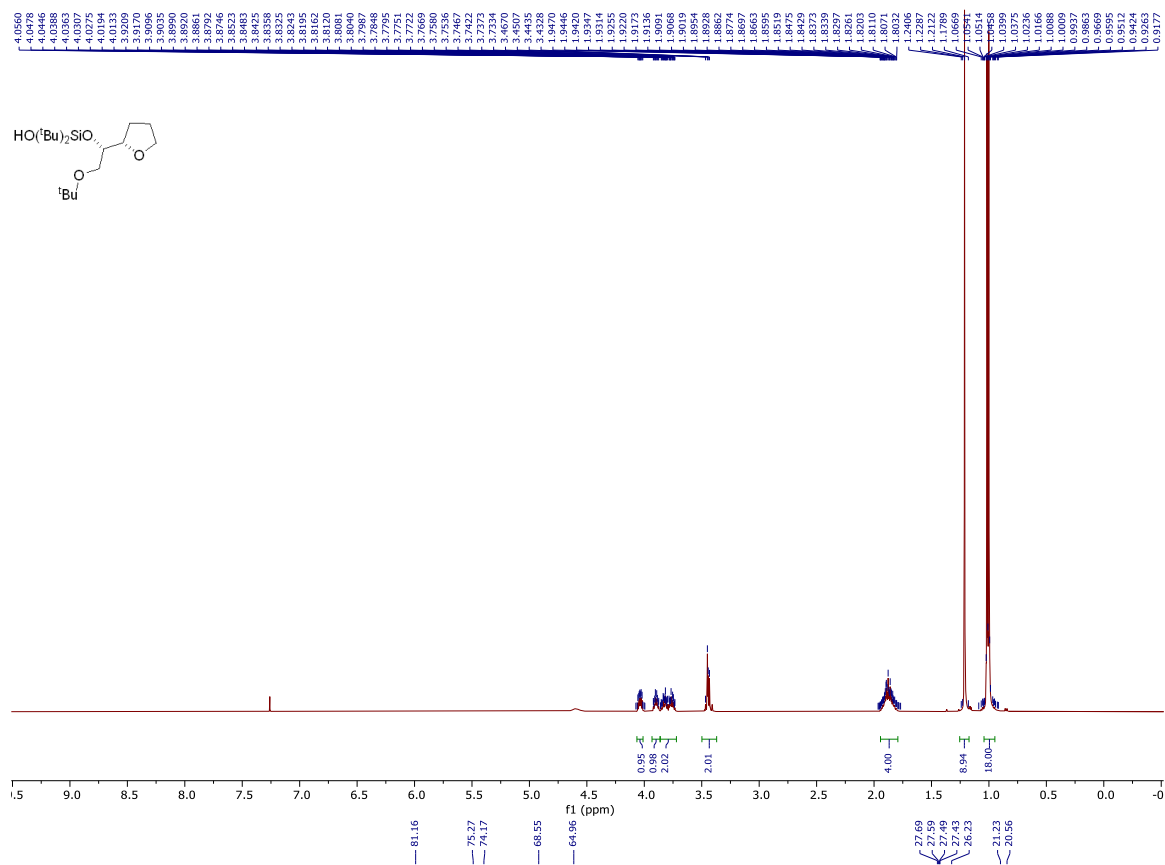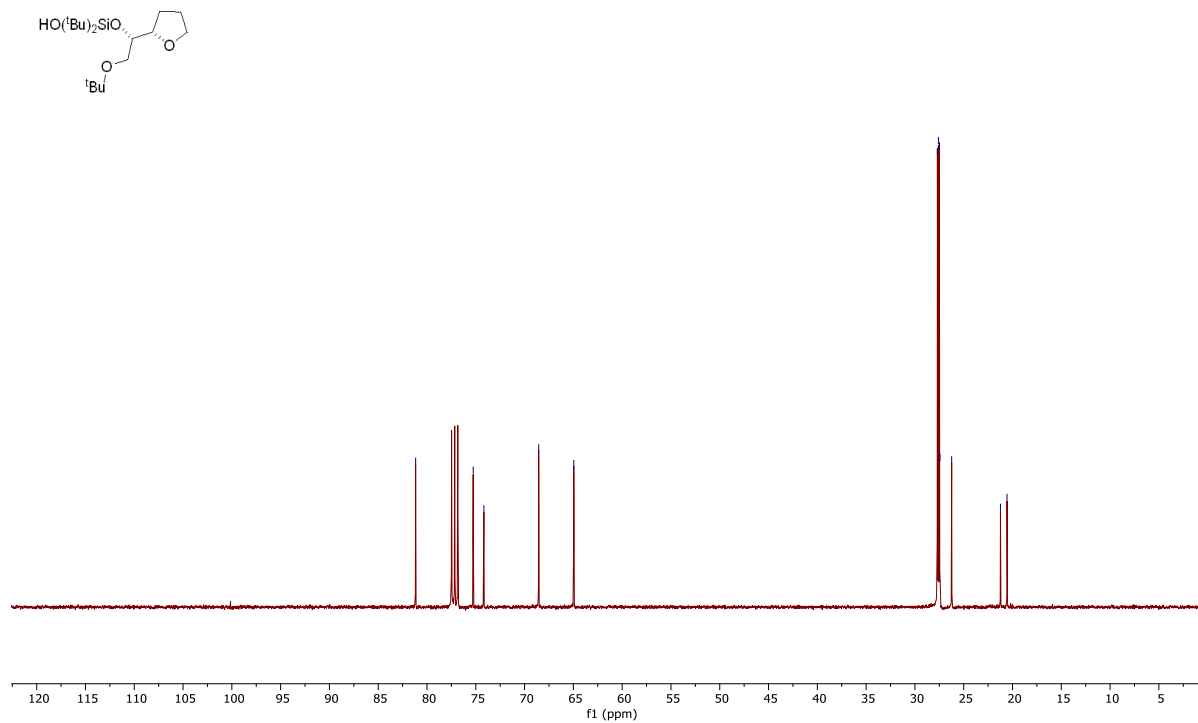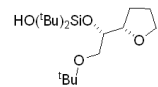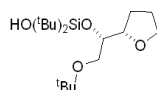

**Compound 55 (CDCl<sub>3</sub>, <sup>1</sup>H NMR: 400 MHz, <sup>13</sup>C{<sup>1</sup>H} NMR: 101 MHz)**

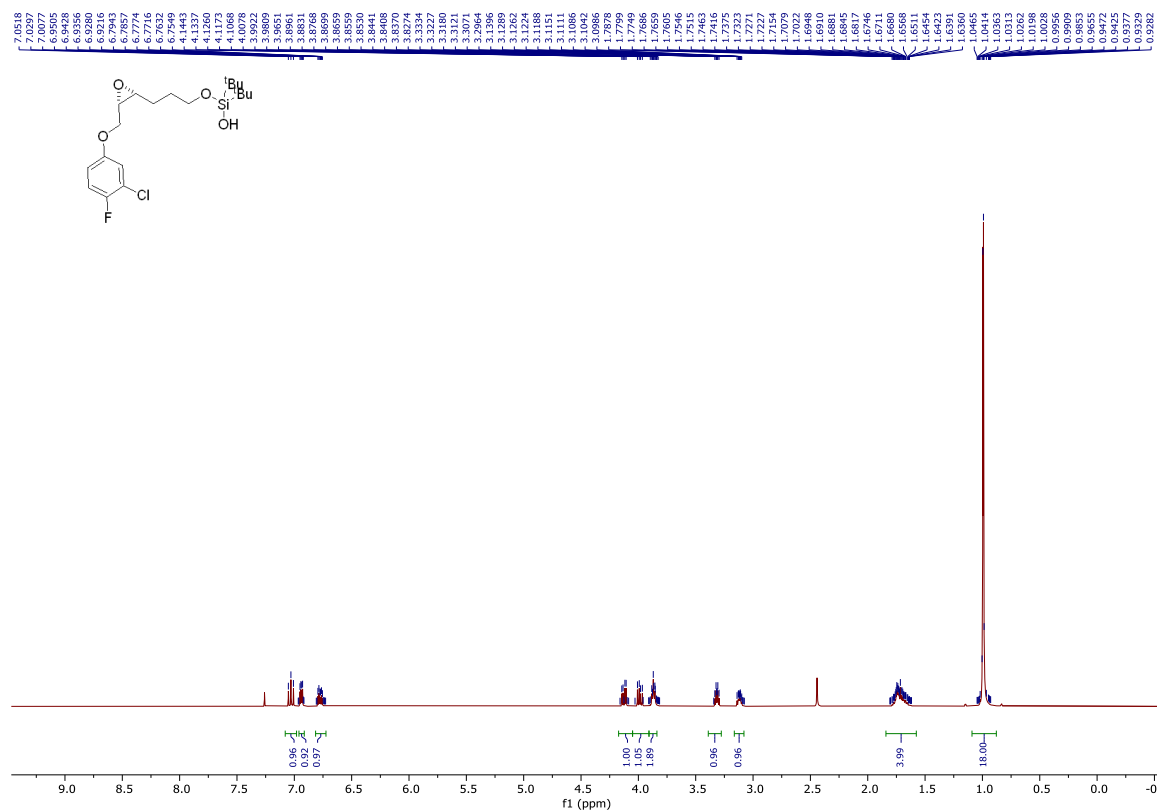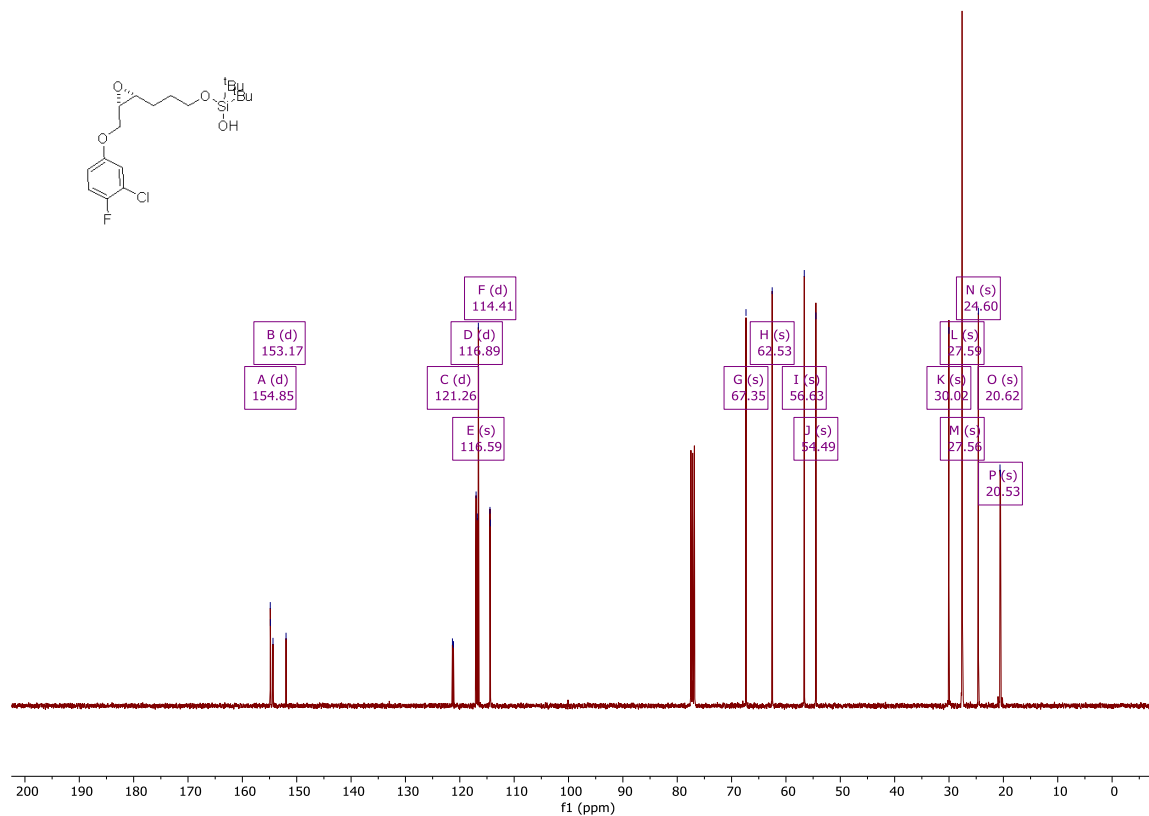

**Compound 56 (CDCl<sub>3</sub>, <sup>1</sup>H NMR: 400 MHz, <sup>13</sup>C{<sup>1</sup>H} NMR: 101 MHz)**

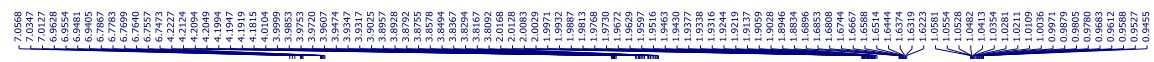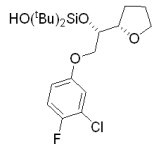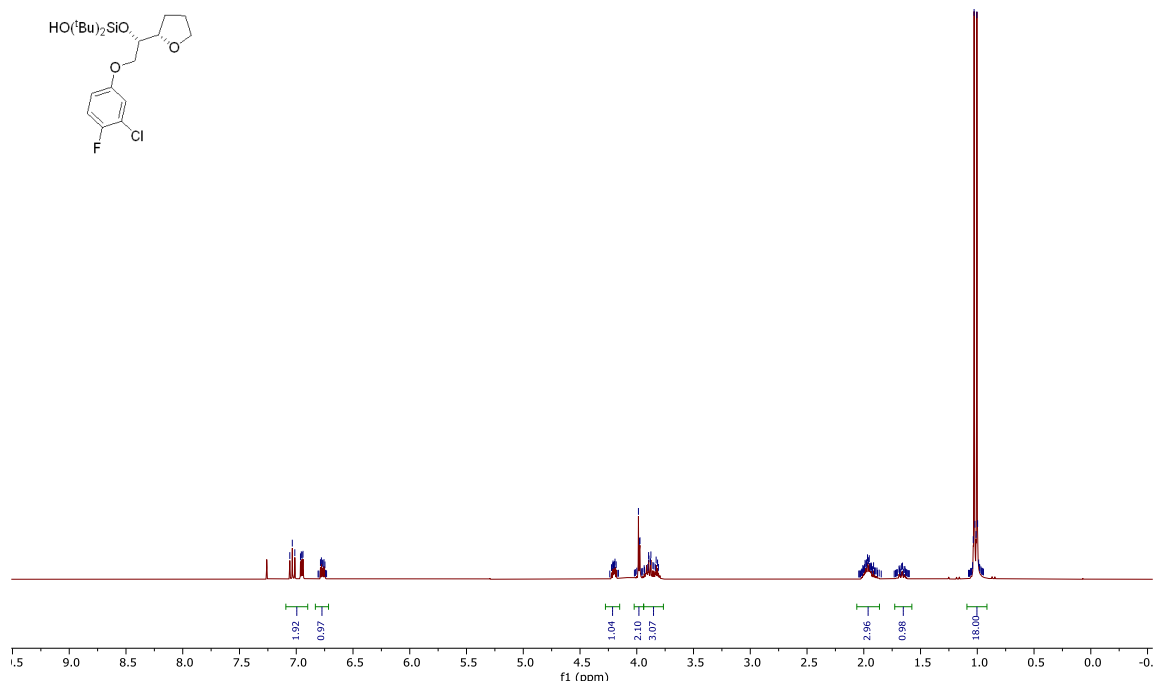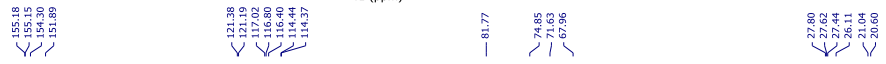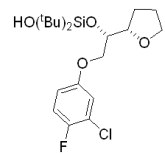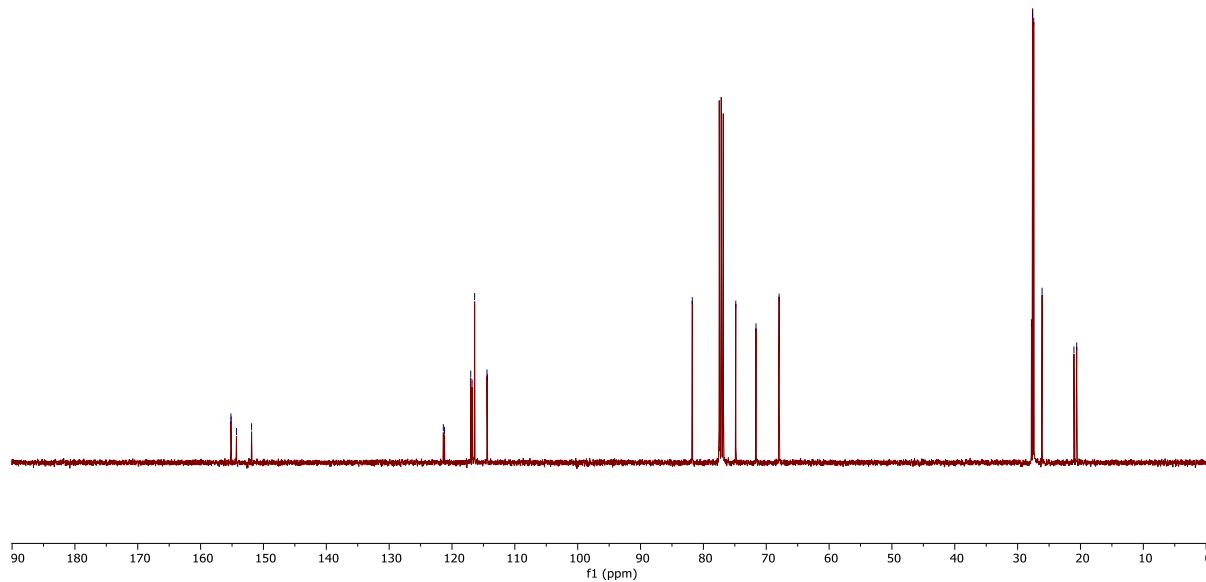



**Compound 58 (CDCl<sub>3</sub>, <sup>1</sup>H NMR: 400 MHz, <sup>13</sup>C{<sup>1</sup>H} NMR: 101 MHz)**

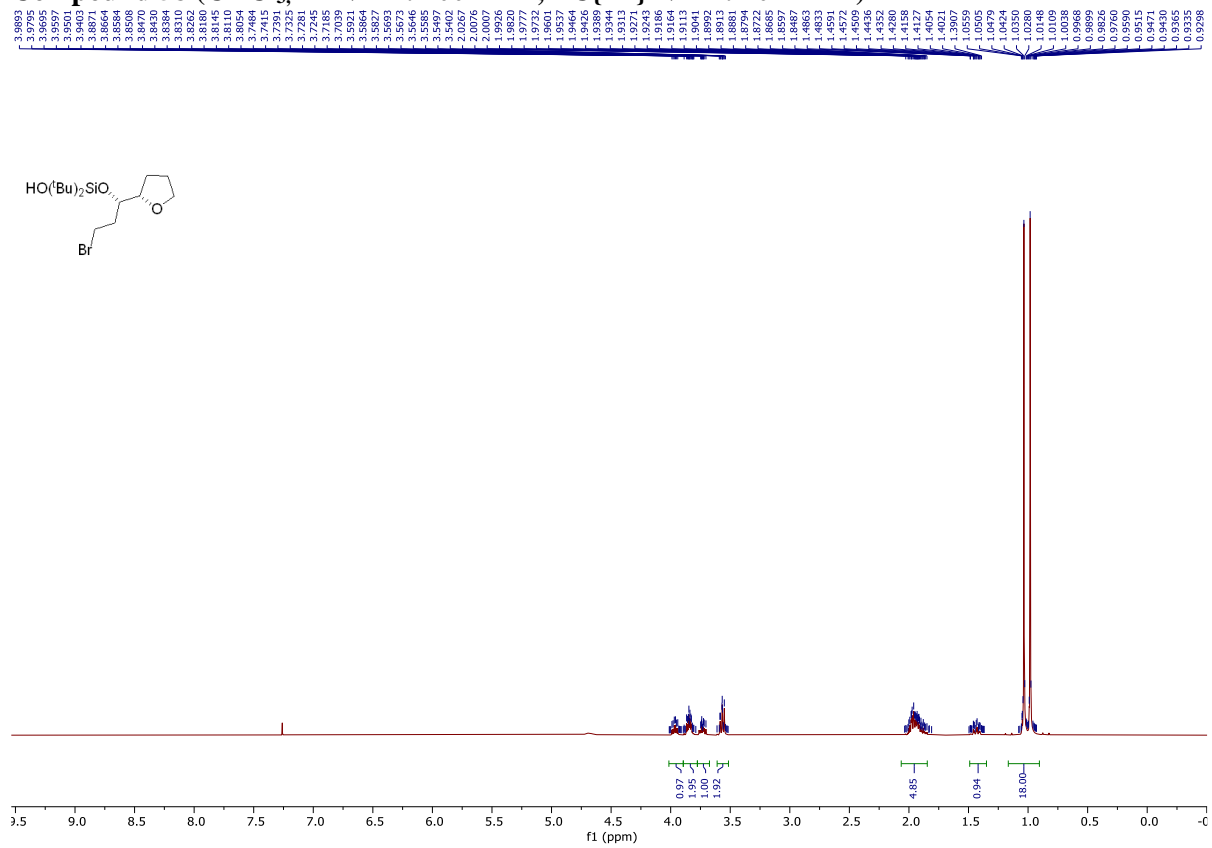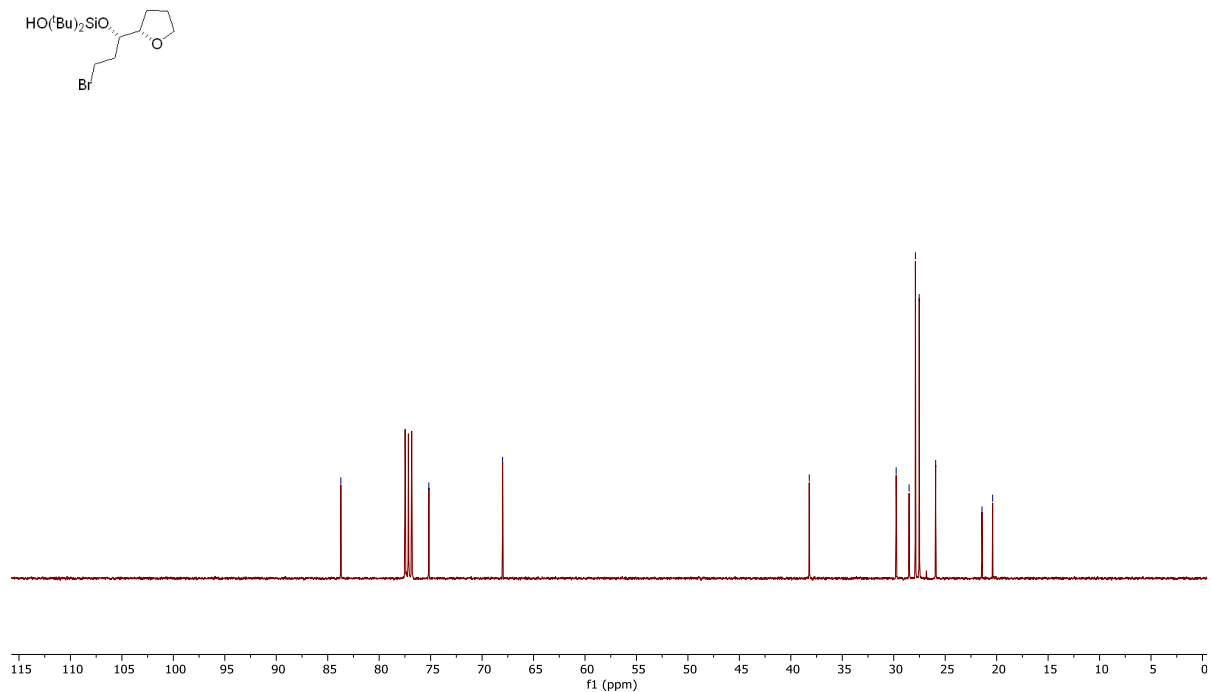



Compound 59 (CDCl<sub>3</sub>, <sup>1</sup>H NMR: 400 MHz, <sup>13</sup>C{<sup>1</sup>H} NMR: 101 MHz)

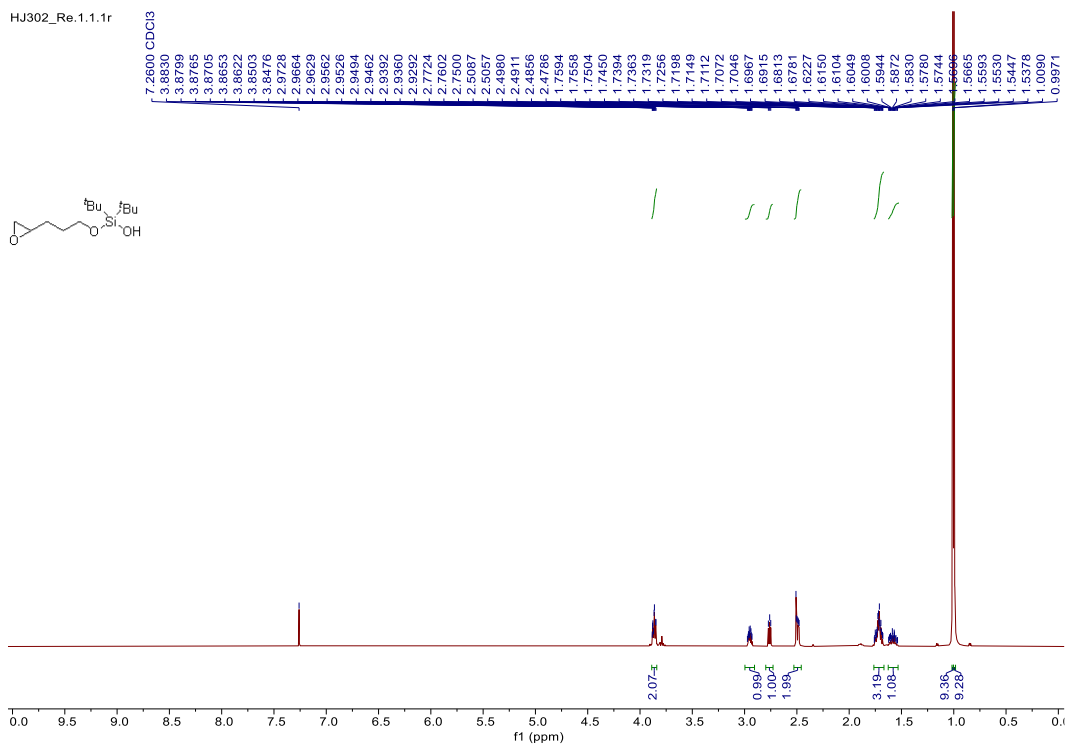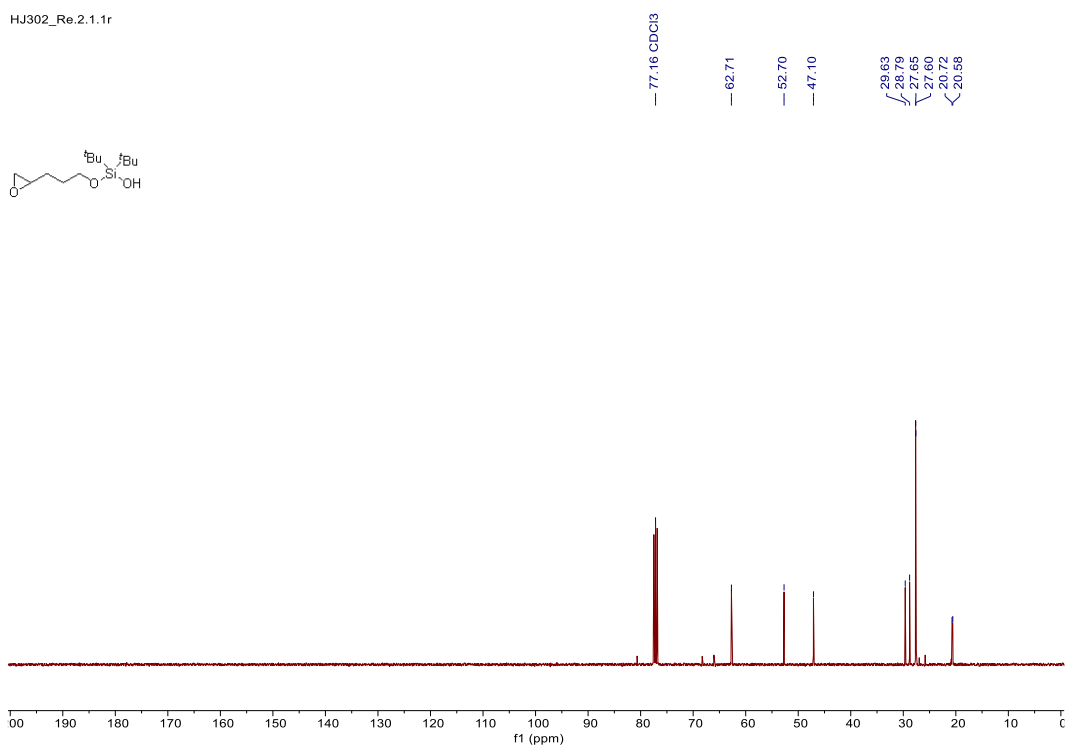

**Compound 60 (CDCl<sub>3</sub>, <sup>1</sup>H NMR: 400 MHz, <sup>13</sup>C{<sup>1</sup>H} NMR: 101 MHz)**

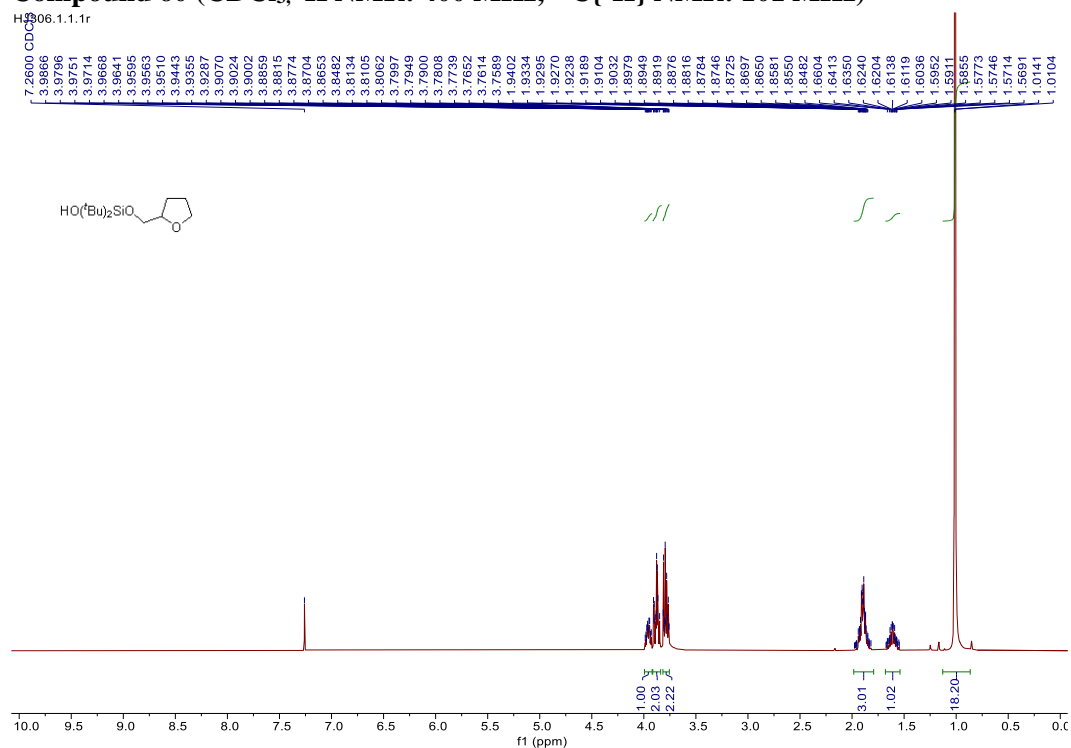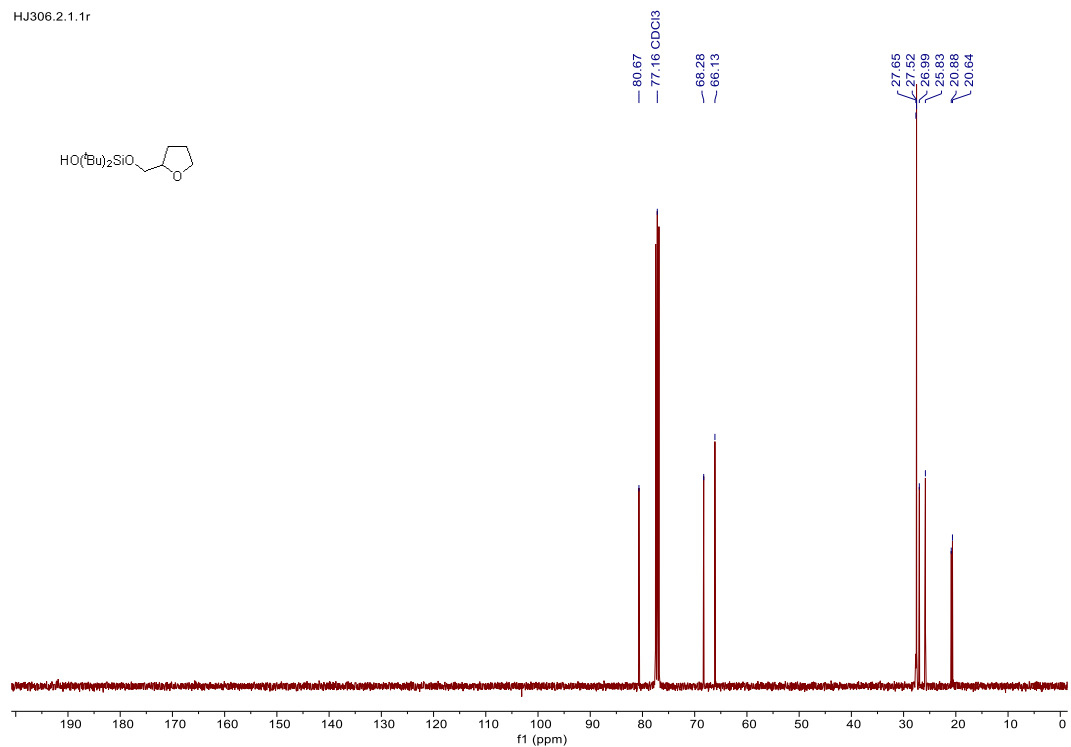

**Compound 61 (CDCl<sub>3</sub>, <sup>1</sup>H NMR: 400 MHz, <sup>13</sup>C{<sup>1</sup>H} NMR: 101 MHz)**

7.5292, 7.5285, 7.5280, 7.5115, 7.5079, 7.5071, 7.5021, 7.4995, 7.3884, 7.3835, 7.3791, 7.3619, 7.3462, 7.3411, 7.3411, 7.3012, 7.2969, 7.2876, 7.2836, 7.2690, 7.2635, 7.2564, 7.2487, 7.0452, 7.0293, 7.0188, 6.9919, 6.9792, 6.9616, 6.9512, 4.0701, 4.0652, 3.0058, 3.0057, 3.8657, 3.8657, 3.7919, 3.2363, 3.2256, 3.2123, 3.2101, 3.0090, 3.0111, 2.9984, 2.9984, 2.9811, 1.6809, 1.6777, 1.6681, 1.6612, 1.6585, 1.6470, 1.6421, 1.6278, 1.6254, 1.6097, 1.5988, 1.5820, 1.5789, 0.9904, 0.9762, 0.9706, 0.9648, 0.9447, 0.9381

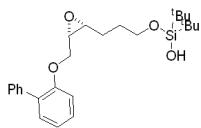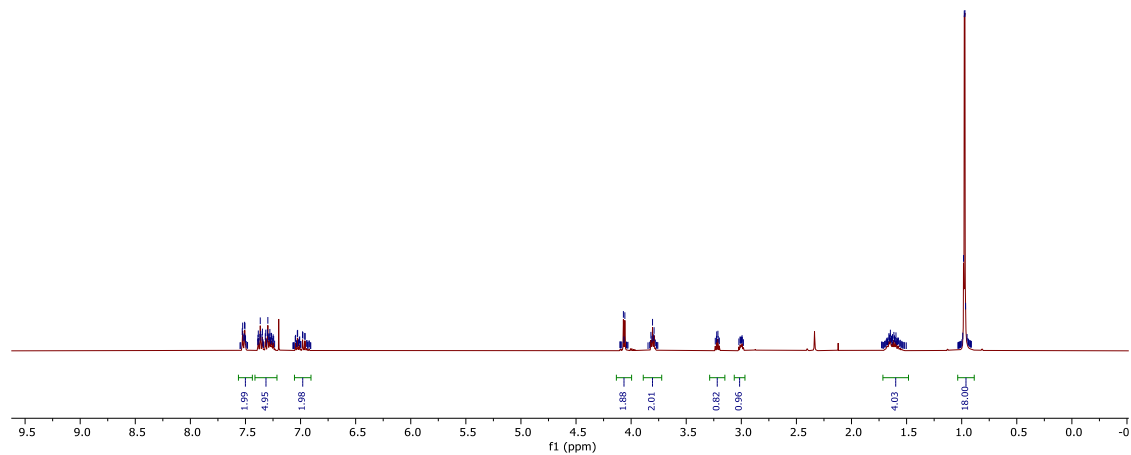

155.54, 138.45, 137.48, 131.48, 131.16, 131.09, 129.66, 128.71, 128.06, 128.04, 127.03, 121.78, 113.38, 67.17, 62.58, 62.55, 56.75, 56.67, 54.70, 30.03, 27.63, 27.59, 24.50, 20.67, 20.64

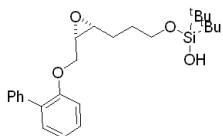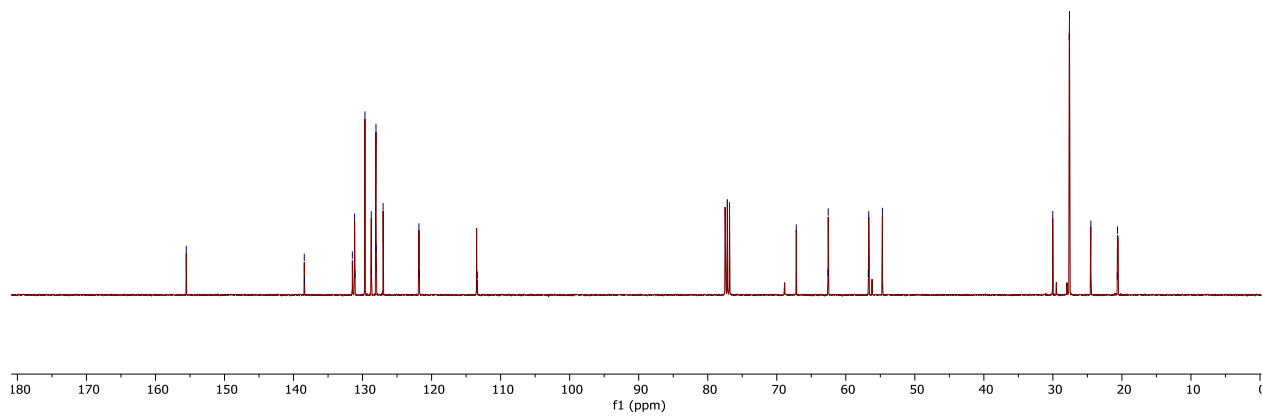

Compound 62 (CDCl<sub>3</sub>, <sup>1</sup>H NMR: 400 MHz, <sup>13</sup>C{<sup>1</sup>H} NMR: 101 MHz)

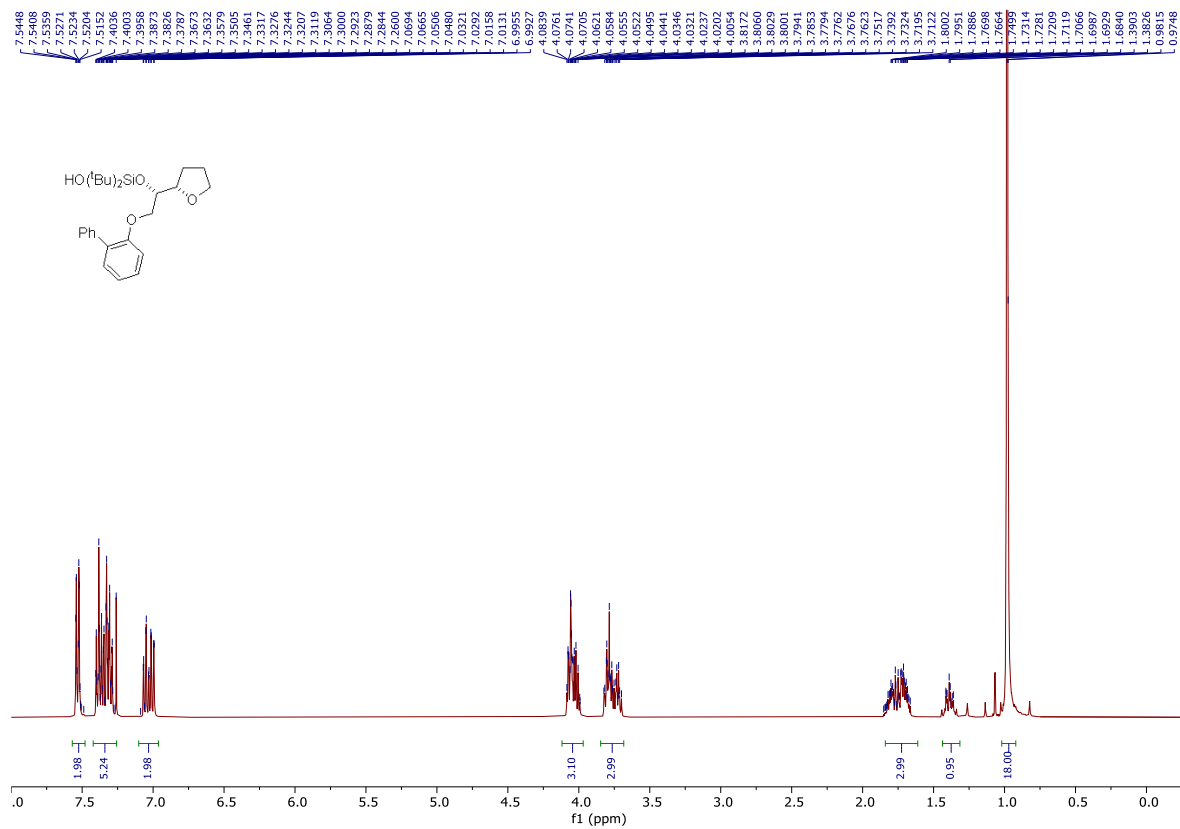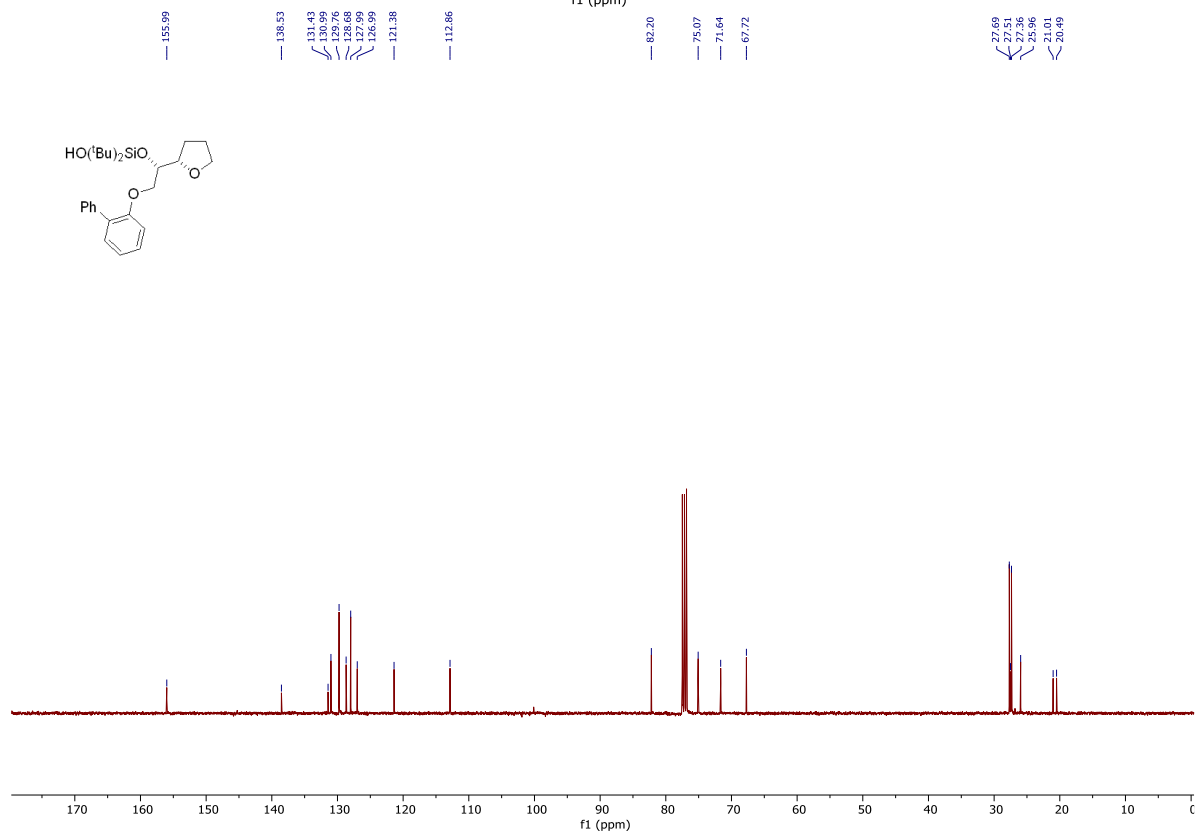

# Compound 63 (CDCl<sub>3</sub>, <sup>1</sup>H NMR: 400 MHz, <sup>13</sup>C{<sup>1</sup>H} NMR: 101 MHz)

HJ504.1.fid

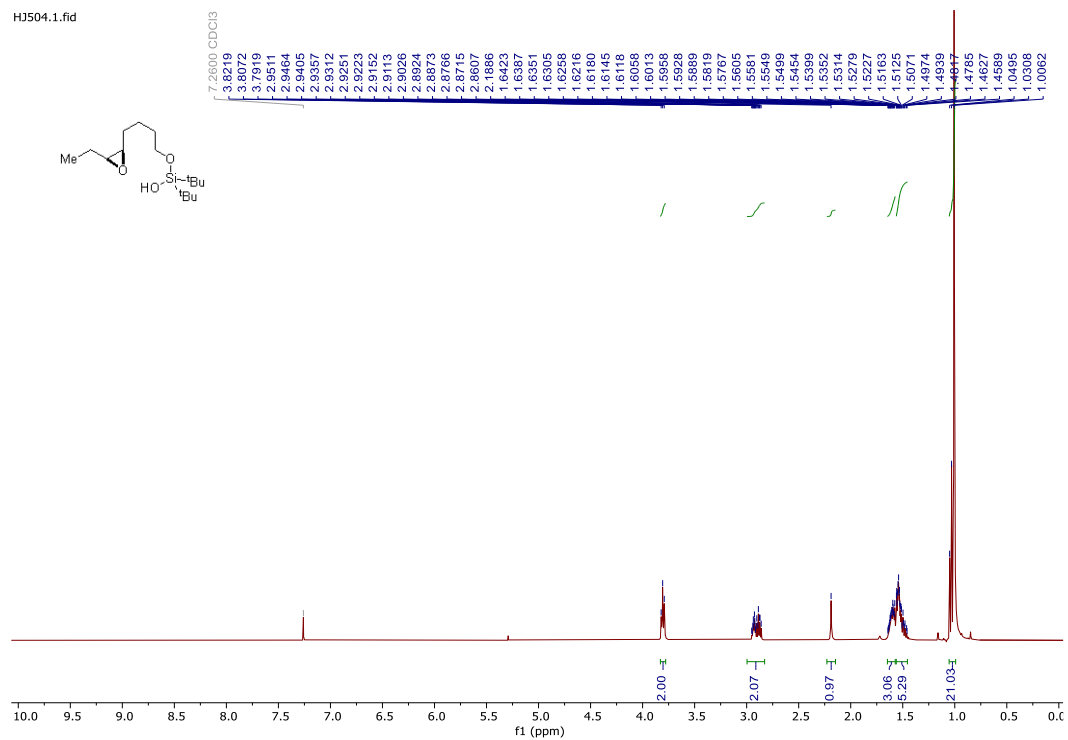

HJ504.2.fid

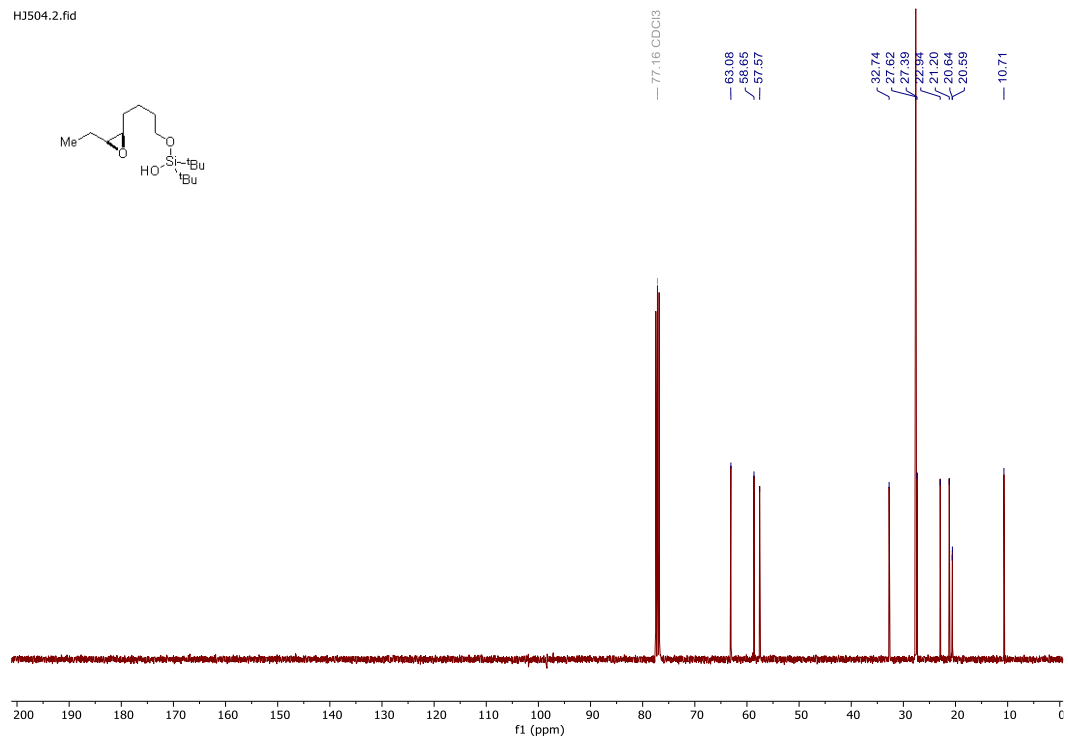

# Compound 64 (CDCl<sub>3</sub>, <sup>1</sup>H NMR: 500 MHz, <sup>13</sup>C{<sup>1</sup>H} NMR: 126 MHz)

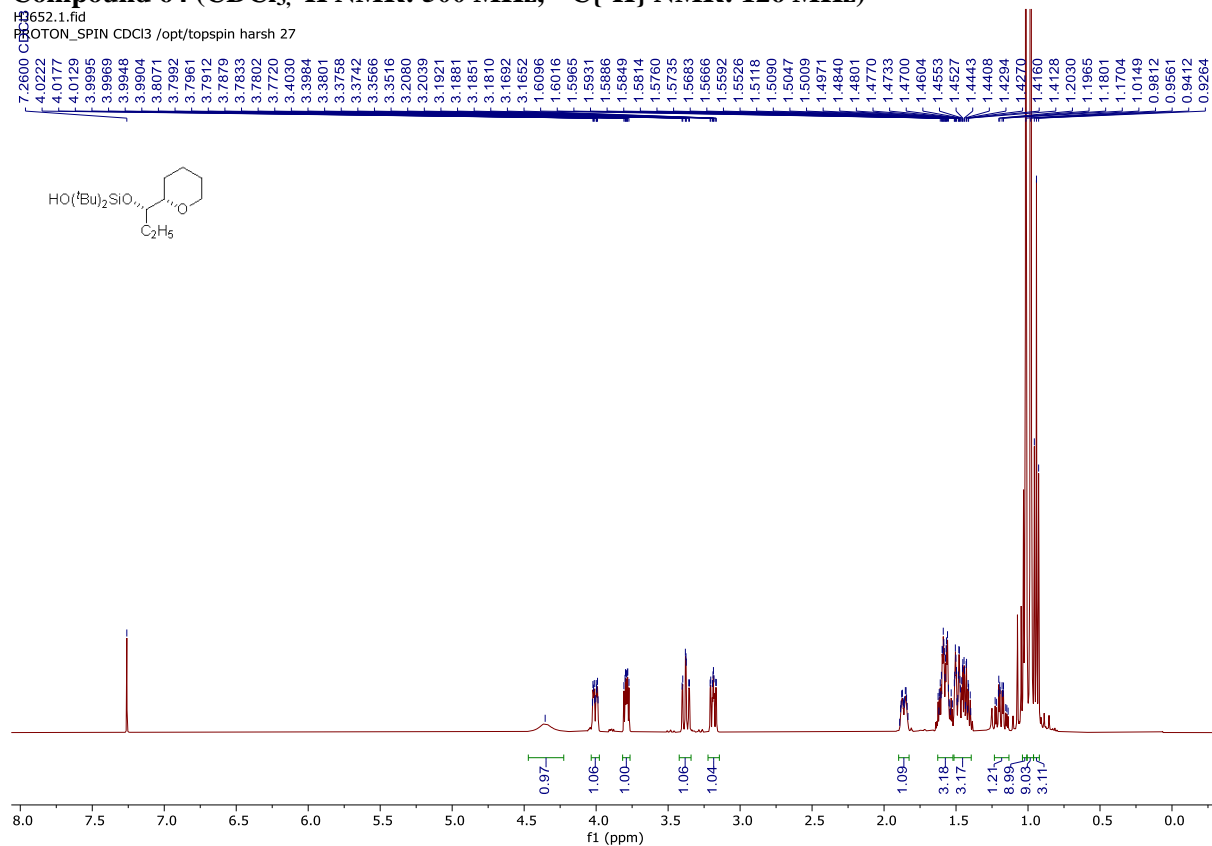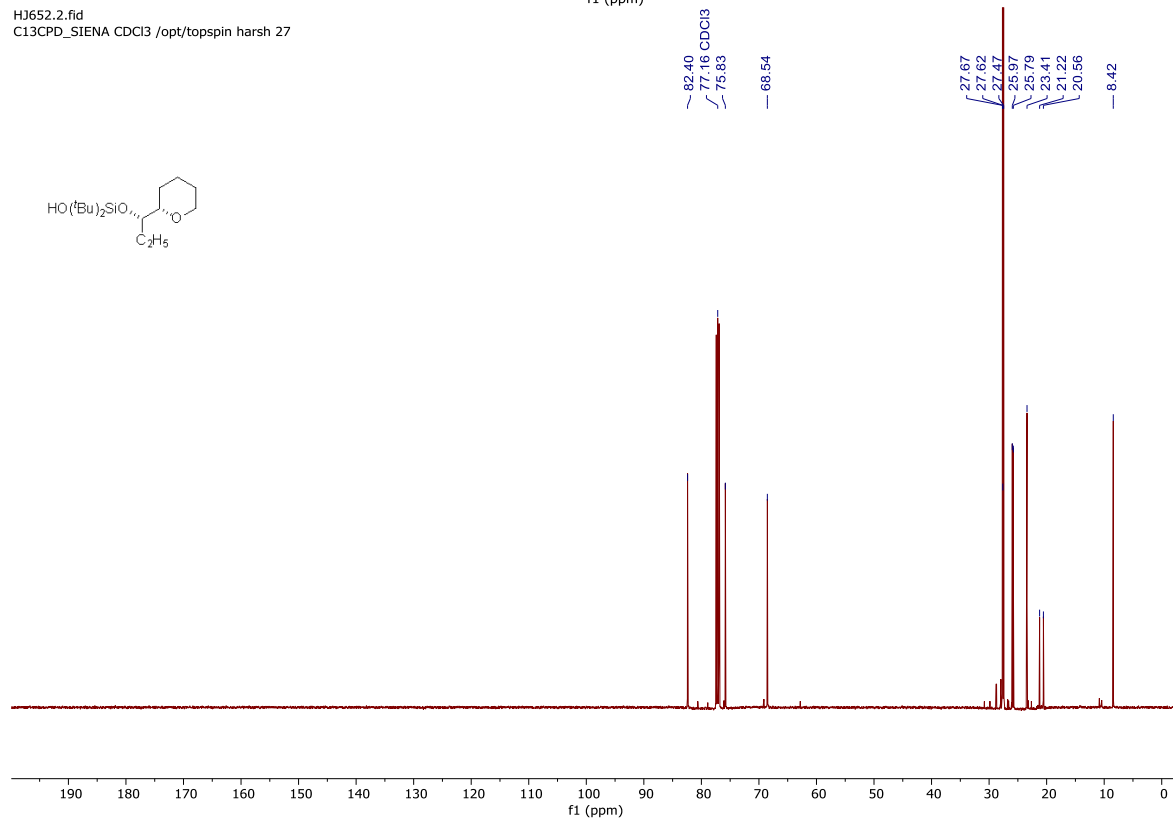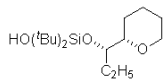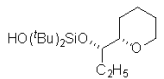

# Compound 65 (CDCl<sub>3</sub>, <sup>1</sup>H NMR: 400 MHz, <sup>13</sup>C{<sup>1</sup>H} NMR: 101 MHz)

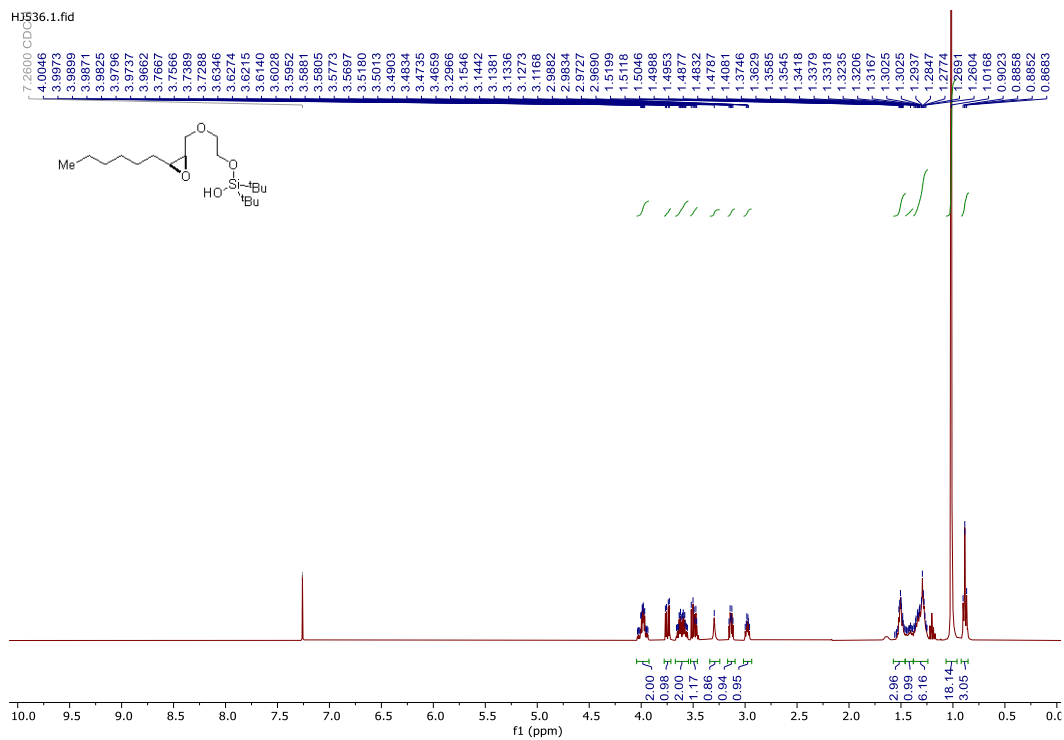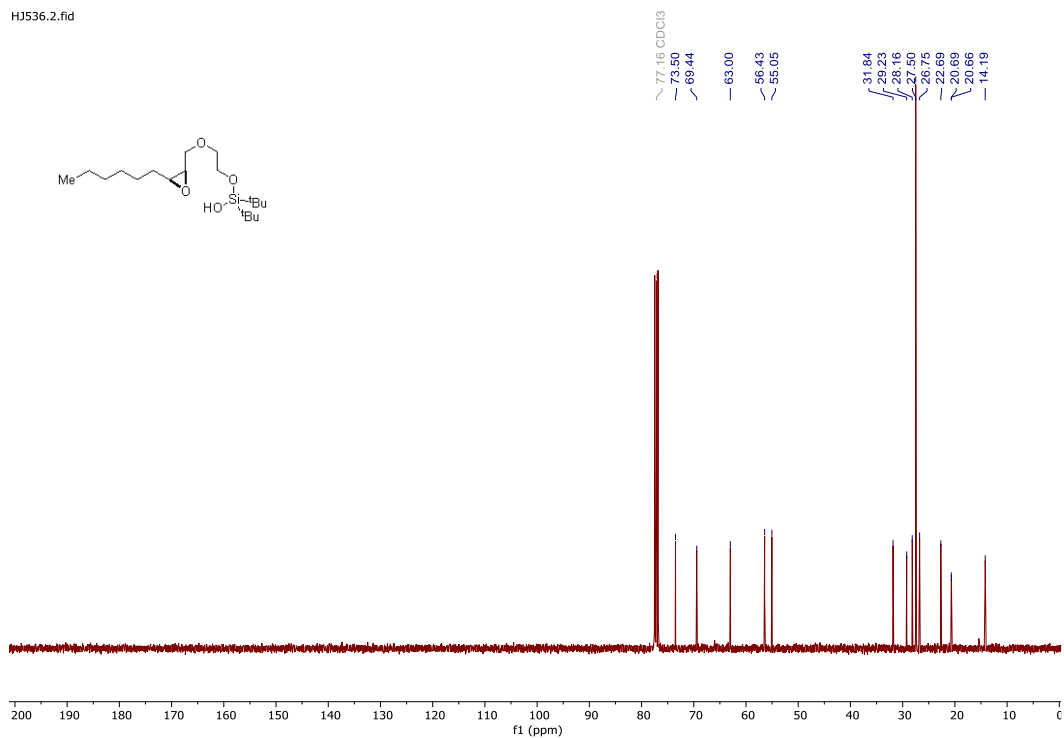

# Compound 66 (CDCl<sub>3</sub>, <sup>1</sup>H NMR: 400 MHz, <sup>13</sup>C{<sup>1</sup>H} NMR: 101 MHz)

HJ538\_539.1.fid

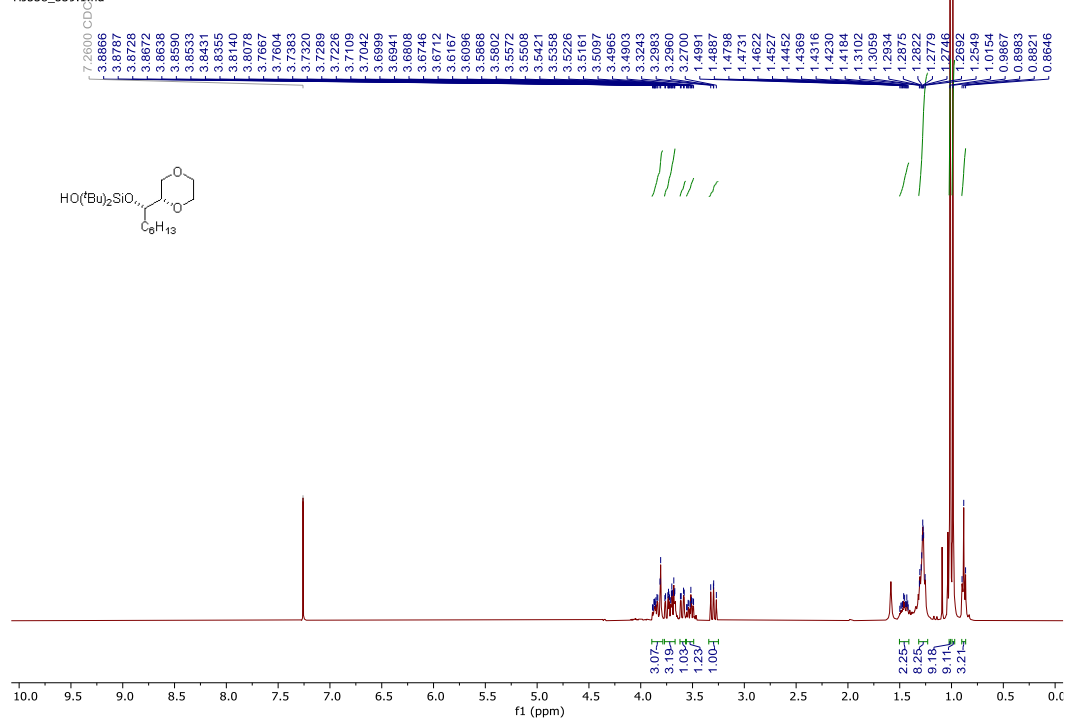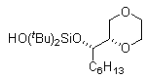

HJ538\_539.2.fid

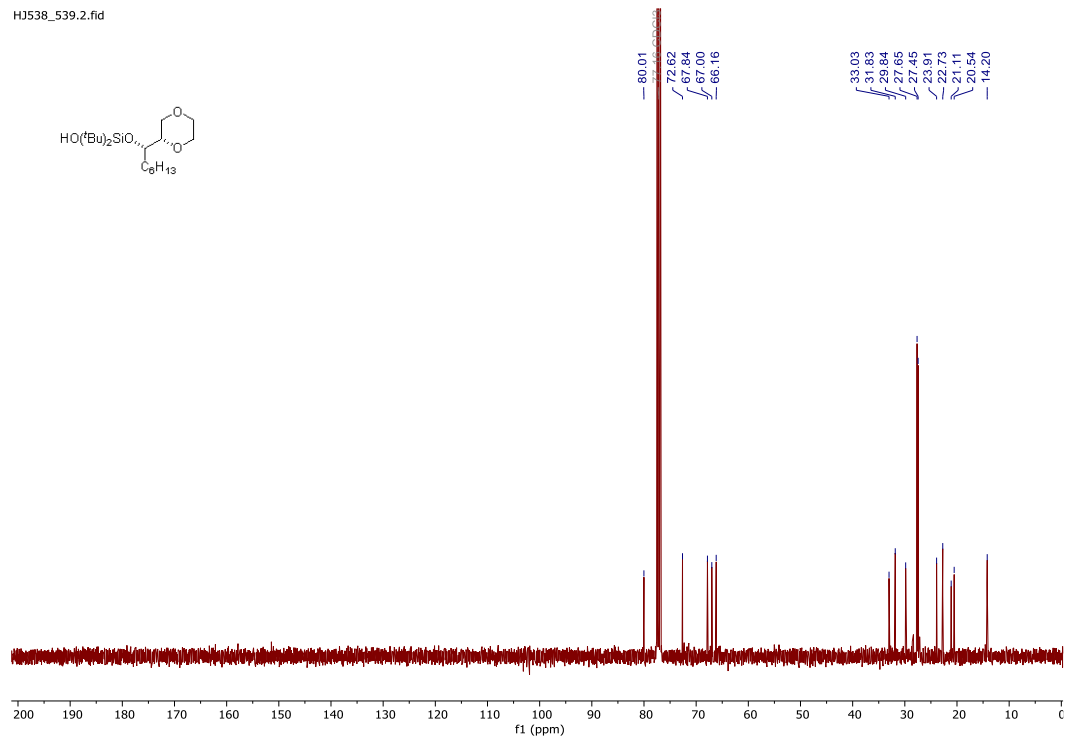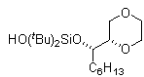



# Compound 67 (CDCl<sub>3</sub>, <sup>1</sup>H NMR: 400 MHz, <sup>13</sup>C{<sup>1</sup>H} NMR: 101 MHz)

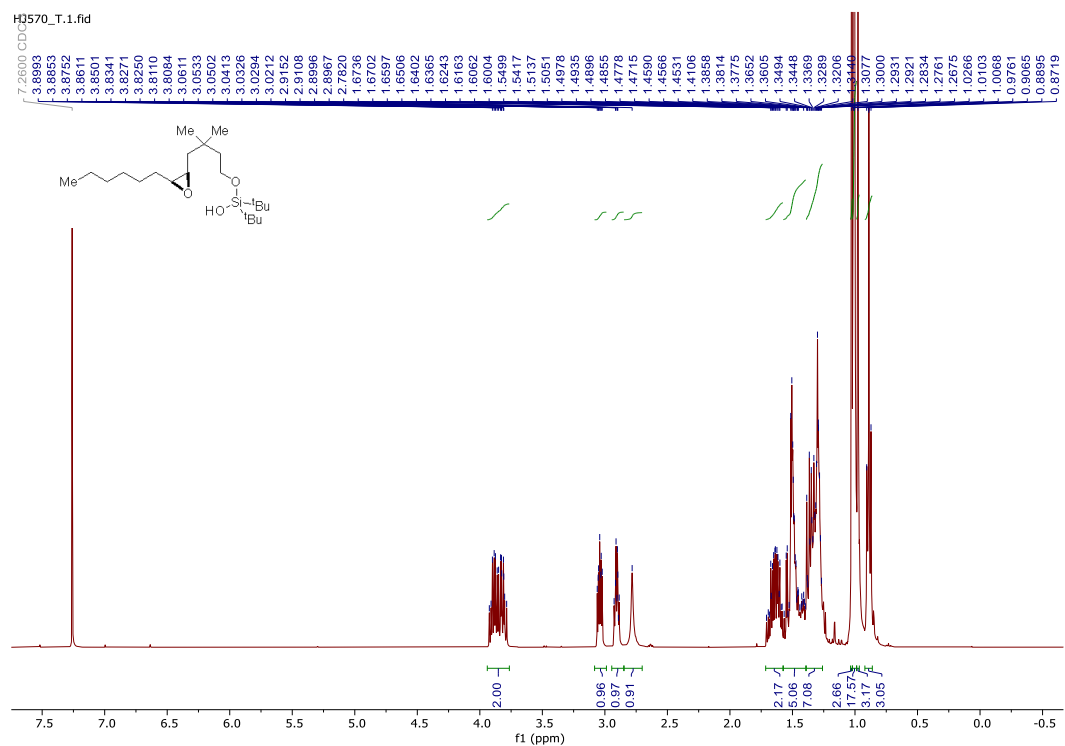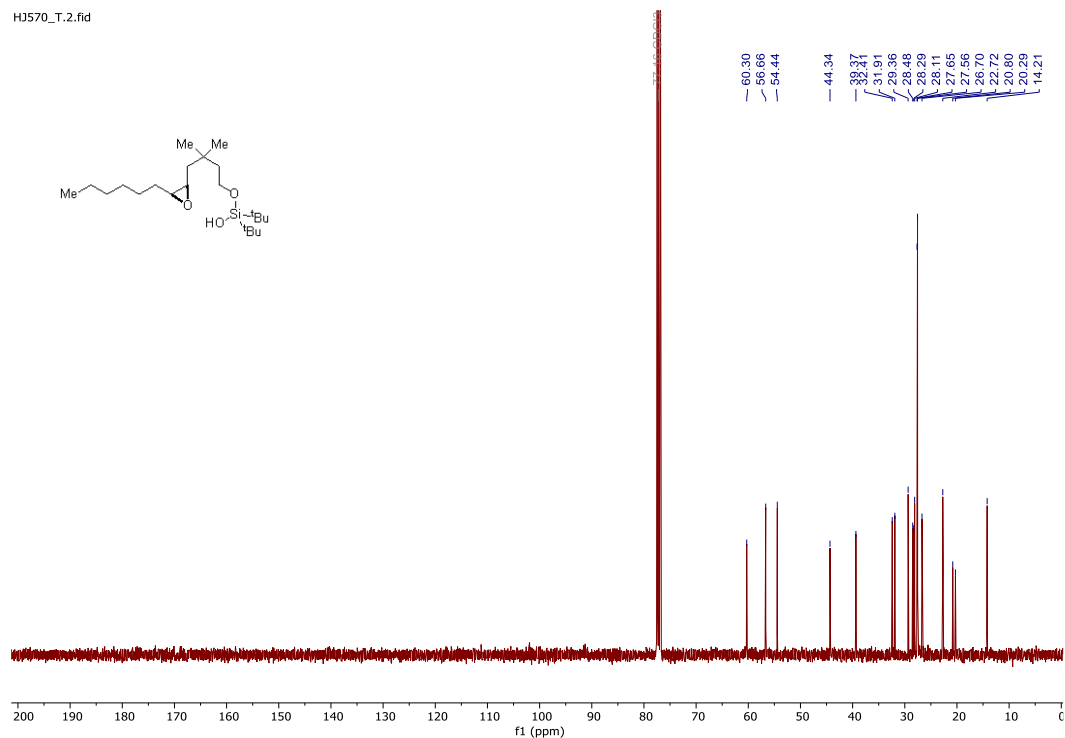

# Compound 68 (CDCl<sub>3</sub>, <sup>1</sup>H NMR: 500 MHz, <sup>13</sup>C{<sup>1</sup>H} NMR: 126 MHz)

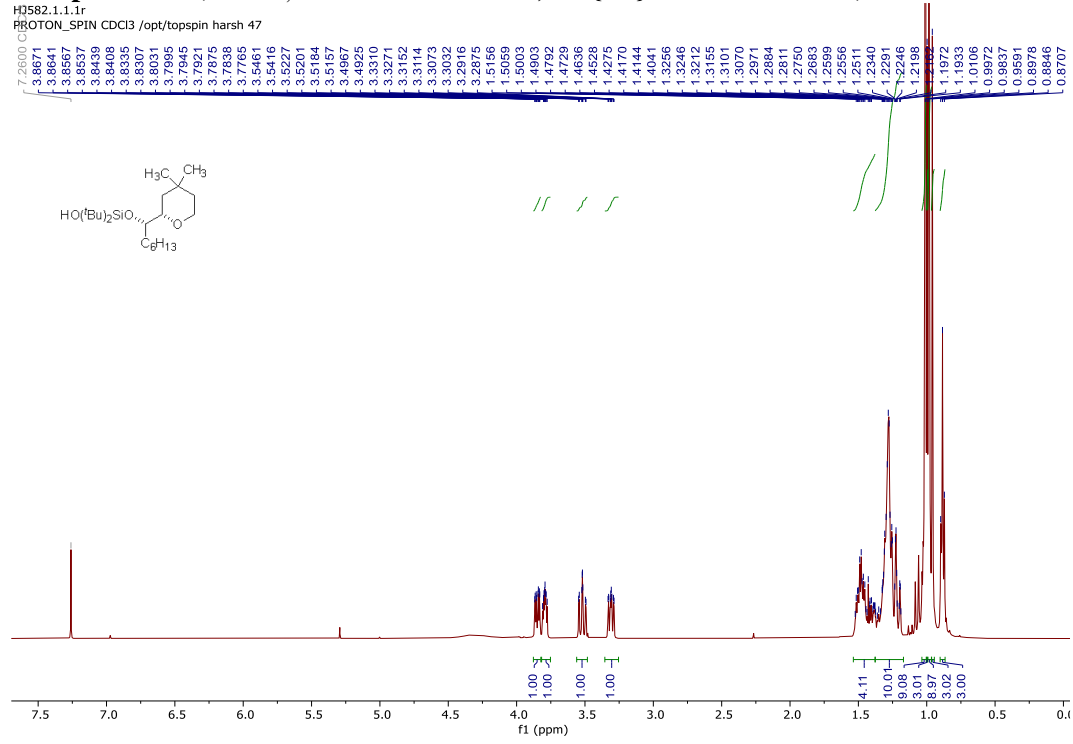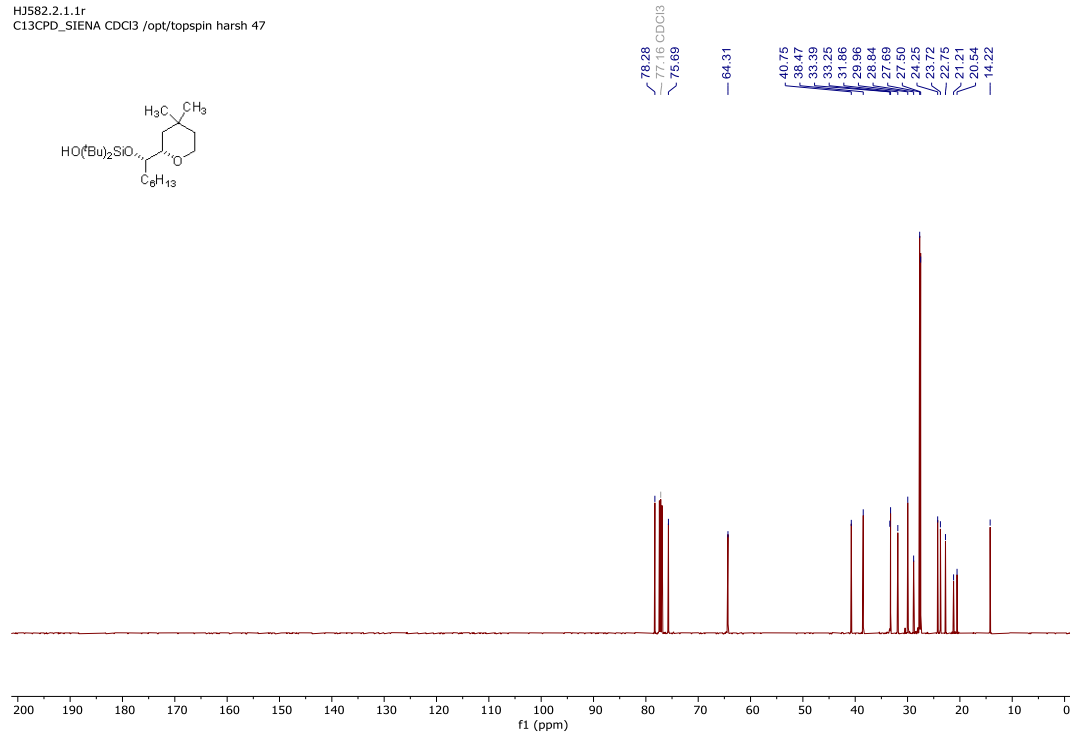

**Compound 69 (CDCl<sub>3</sub>, <sup>1</sup>H NMR: 400 MHz, <sup>13</sup>C{<sup>1</sup>H} NMR: 101 MHz)**

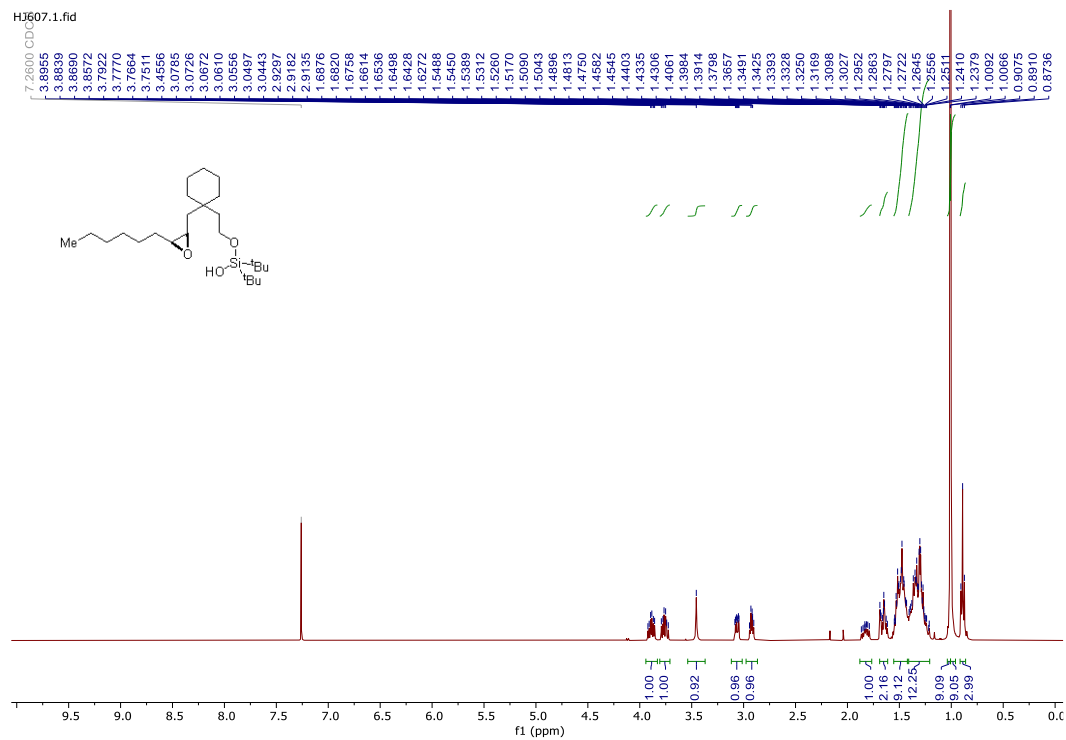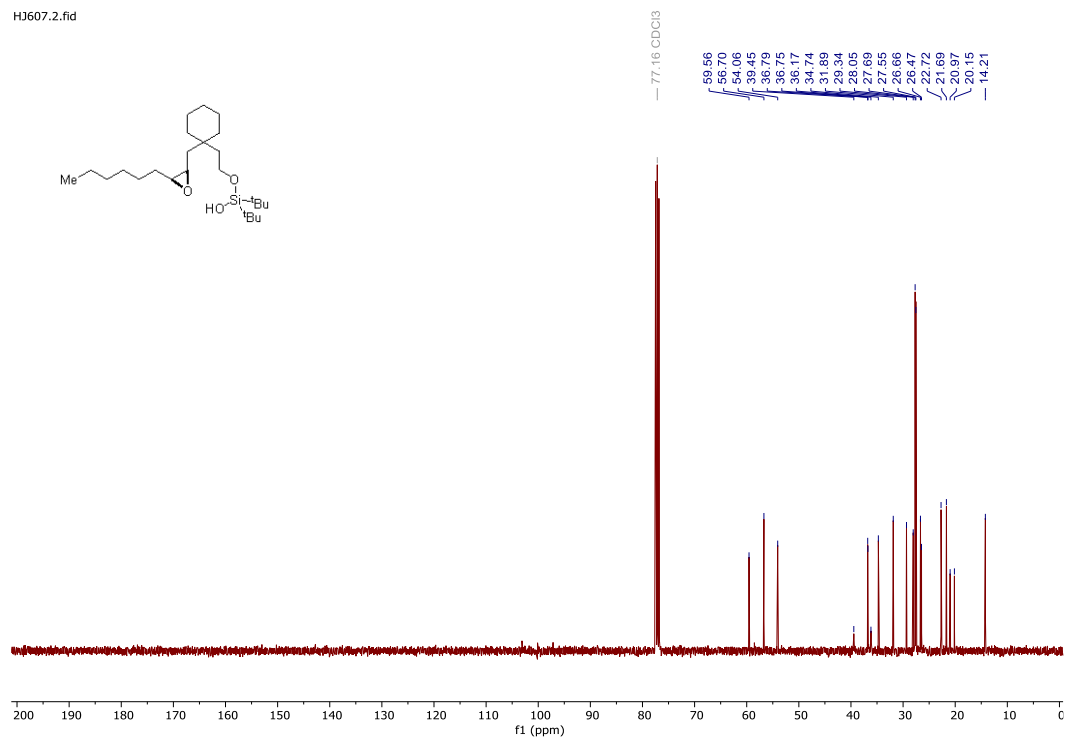

# Compound 70 (CDCl<sub>3</sub>, <sup>1</sup>H NMR: 500 MHz, <sup>13</sup>C{<sup>1</sup>H} NMR: 126 MHz)

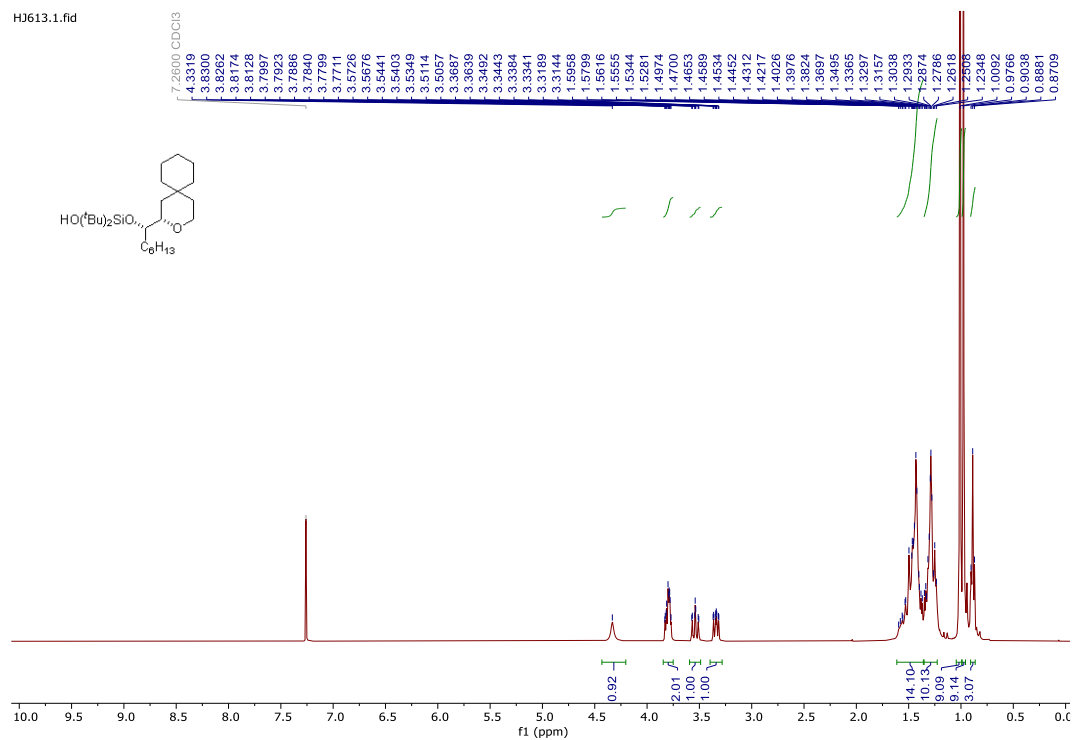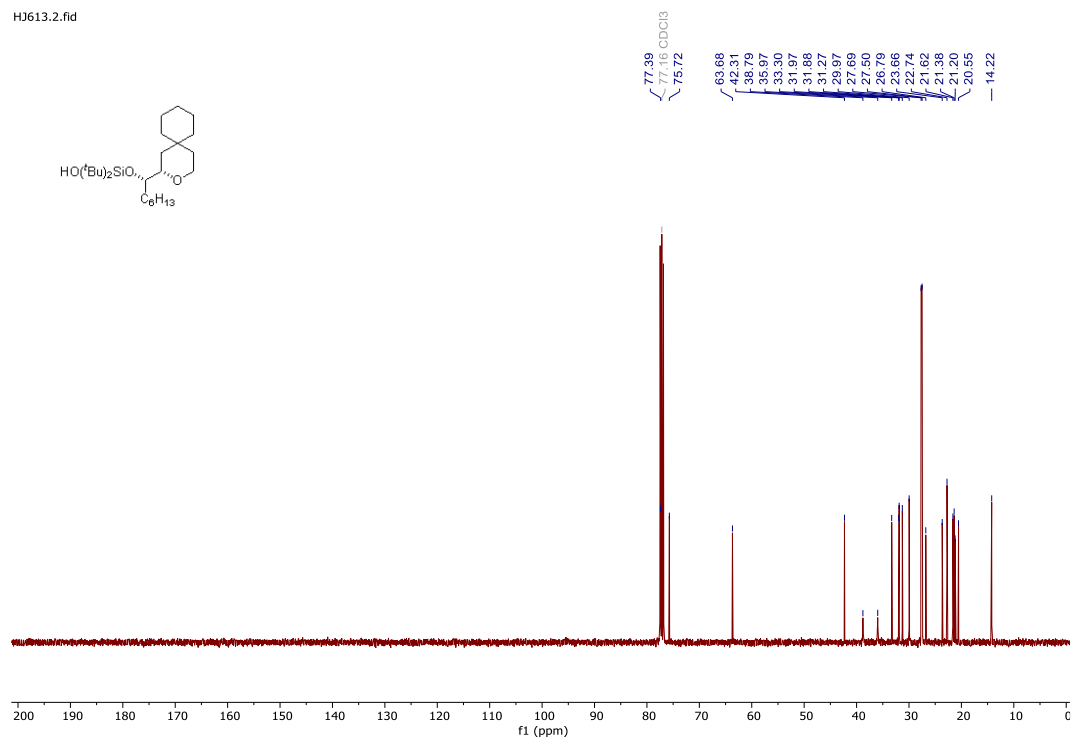

Compound 71 (CDCl<sub>3</sub>, <sup>1</sup>H NMR: 400 MHz, <sup>13</sup>C{<sup>1</sup>H} NMR: 101 MHz)

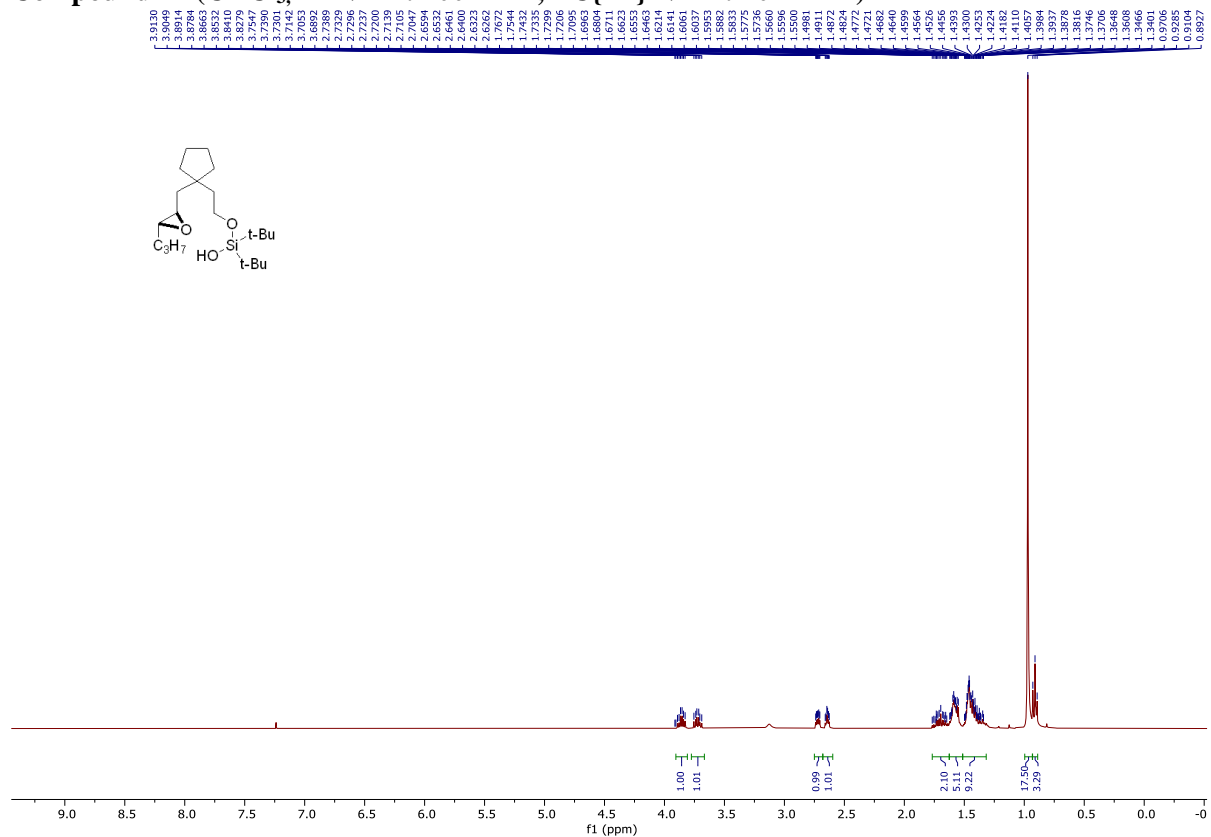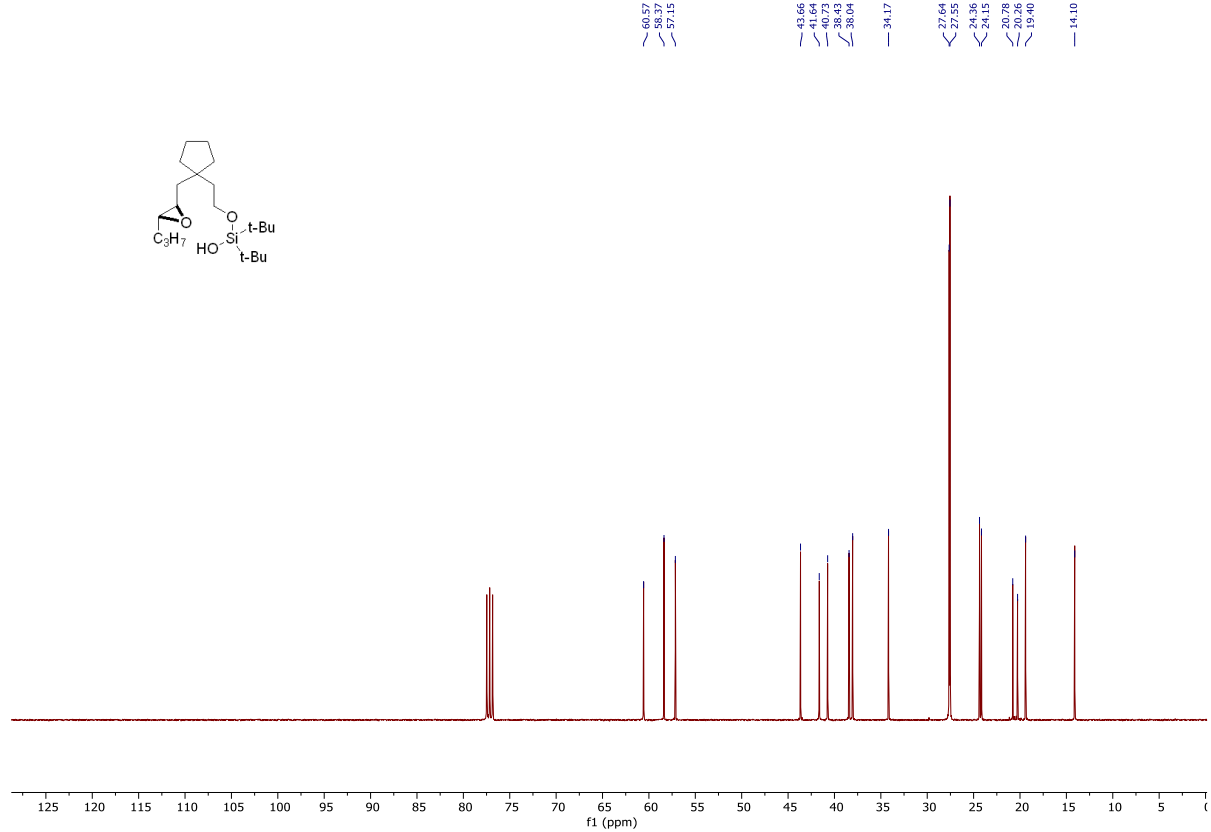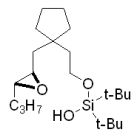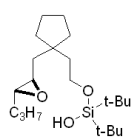

**Compound 72 (CDCl<sub>3</sub>, <sup>1</sup>H NMR: 400 MHz, <sup>13</sup>C{<sup>1</sup>H} NMR: 101 MHz)**

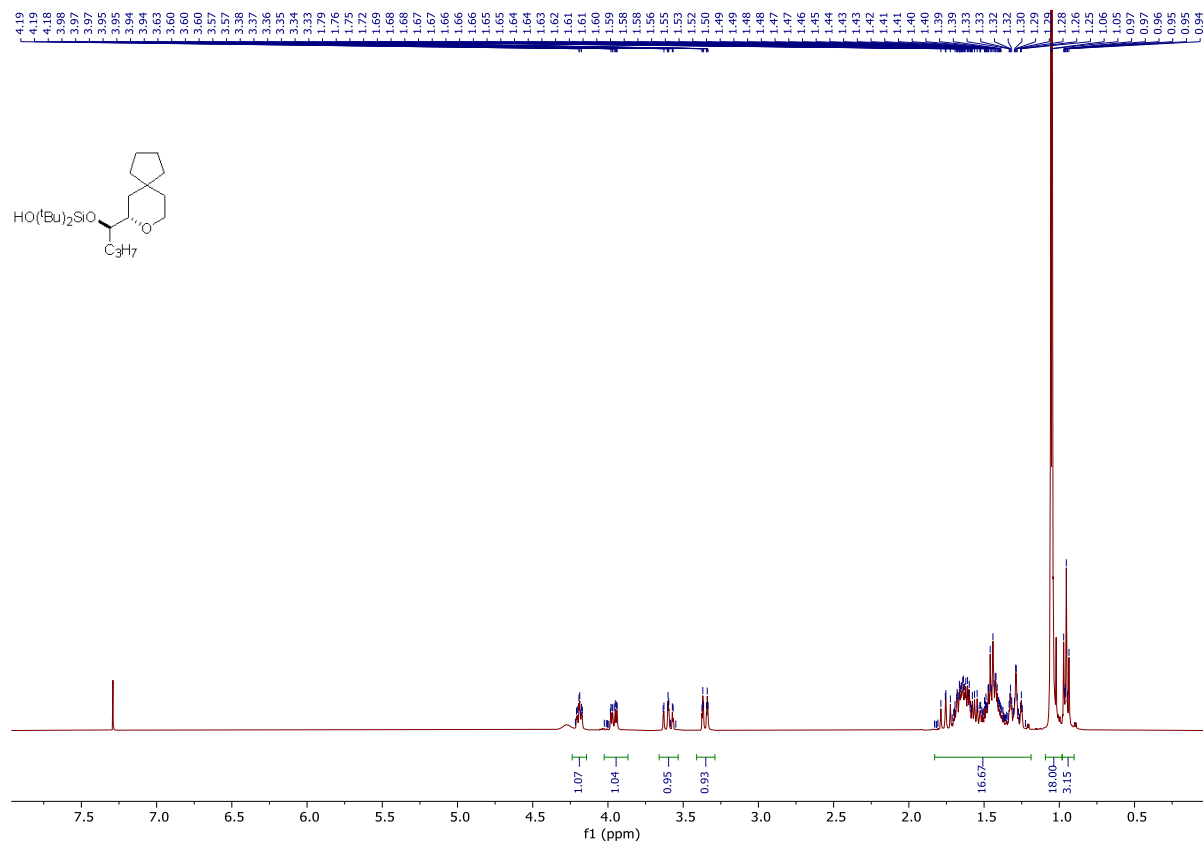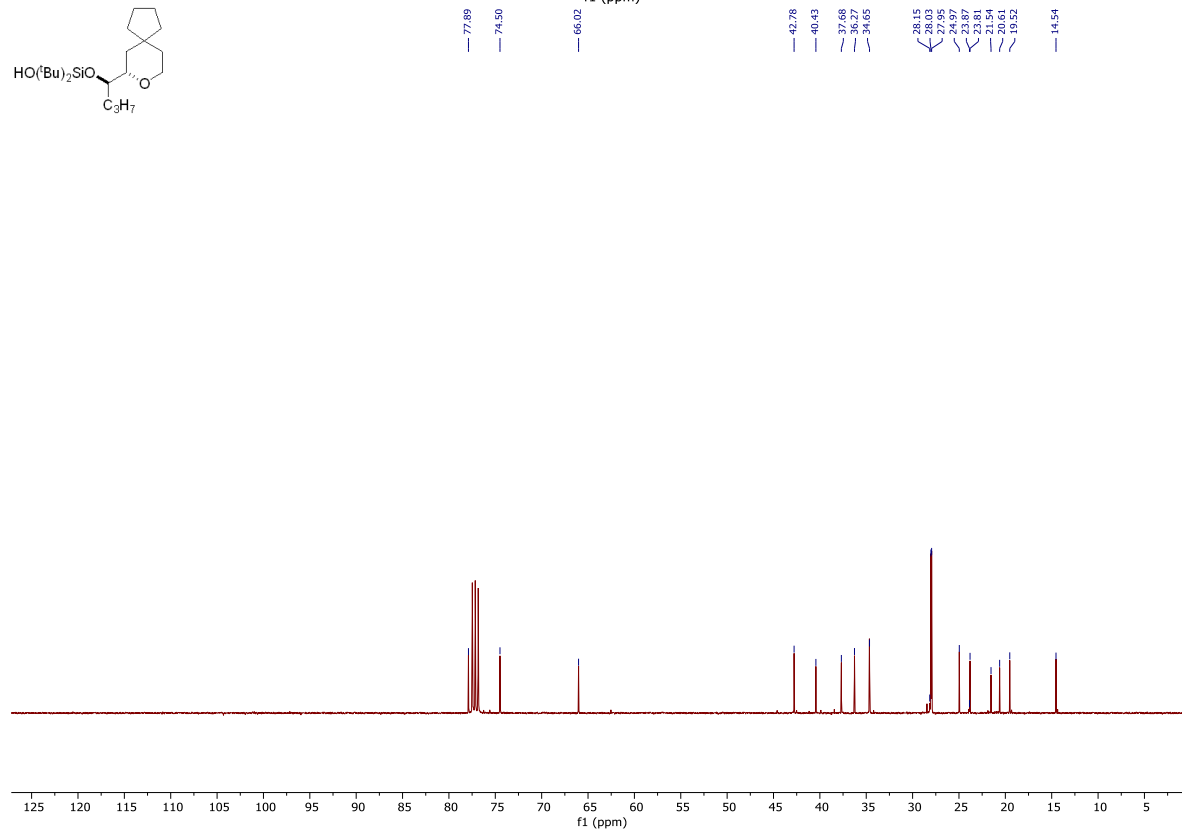

**Compound 73 (CDCl<sub>3</sub>, <sup>1</sup>H NMR: 400 MHz, <sup>13</sup>C{<sup>1</sup>H} NMR: 101 MHz)**

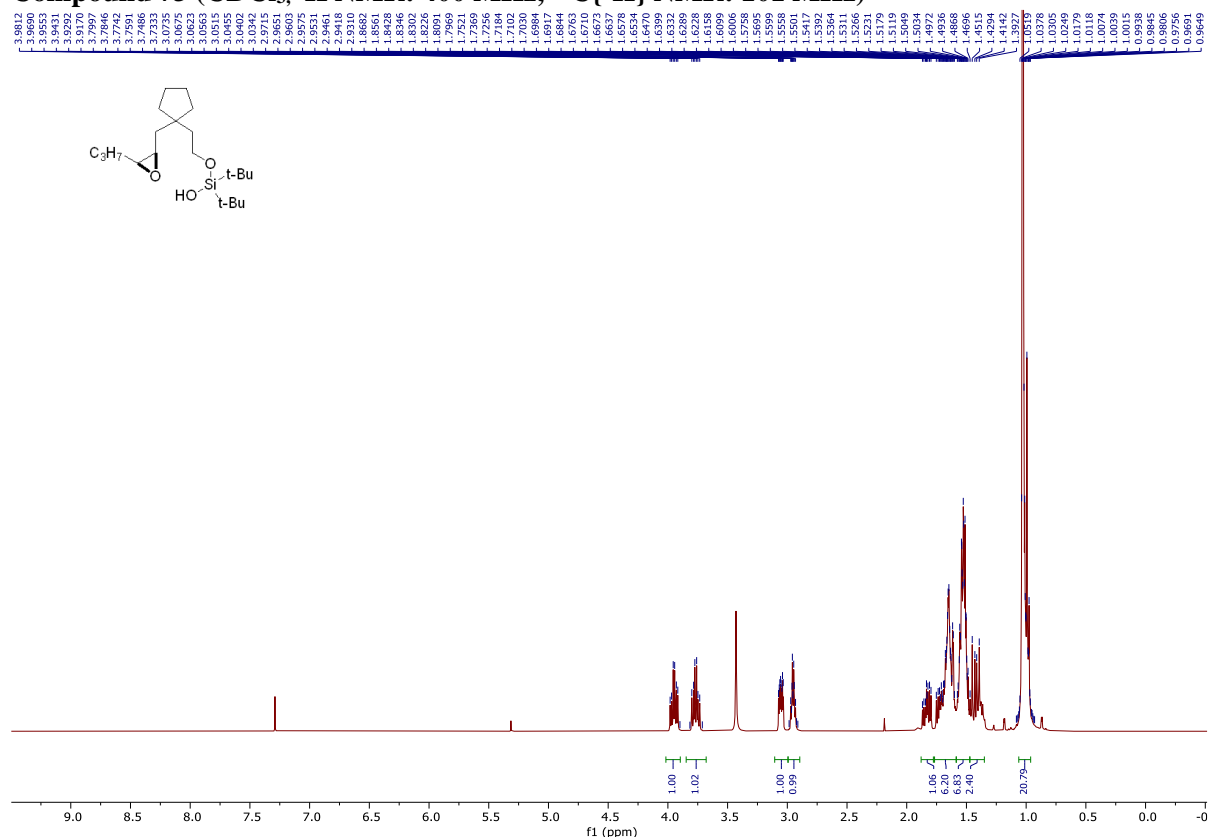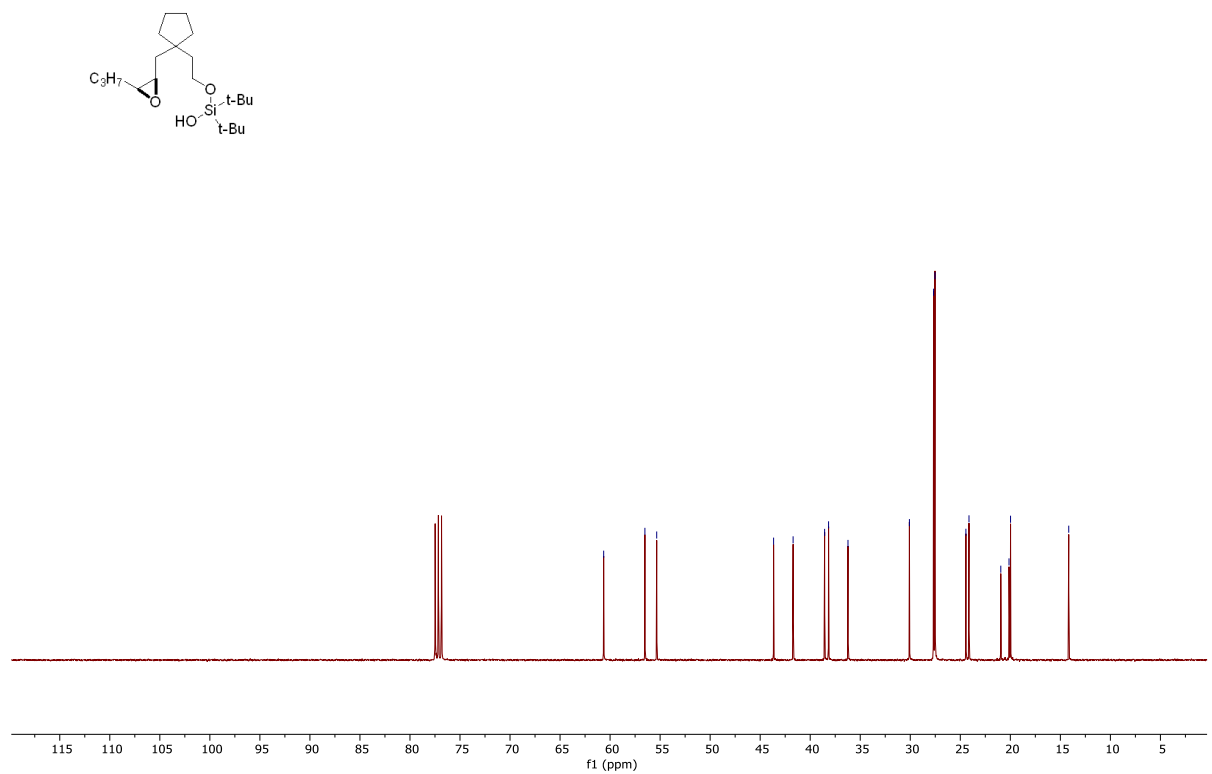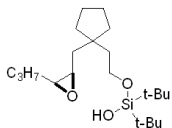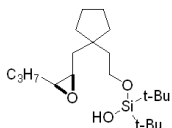

**Compound 74 (CDCl<sub>3</sub>, <sup>1</sup>H NMR: 400 MHz, <sup>13</sup>C{<sup>1</sup>H} NMR: 101 MHz)**

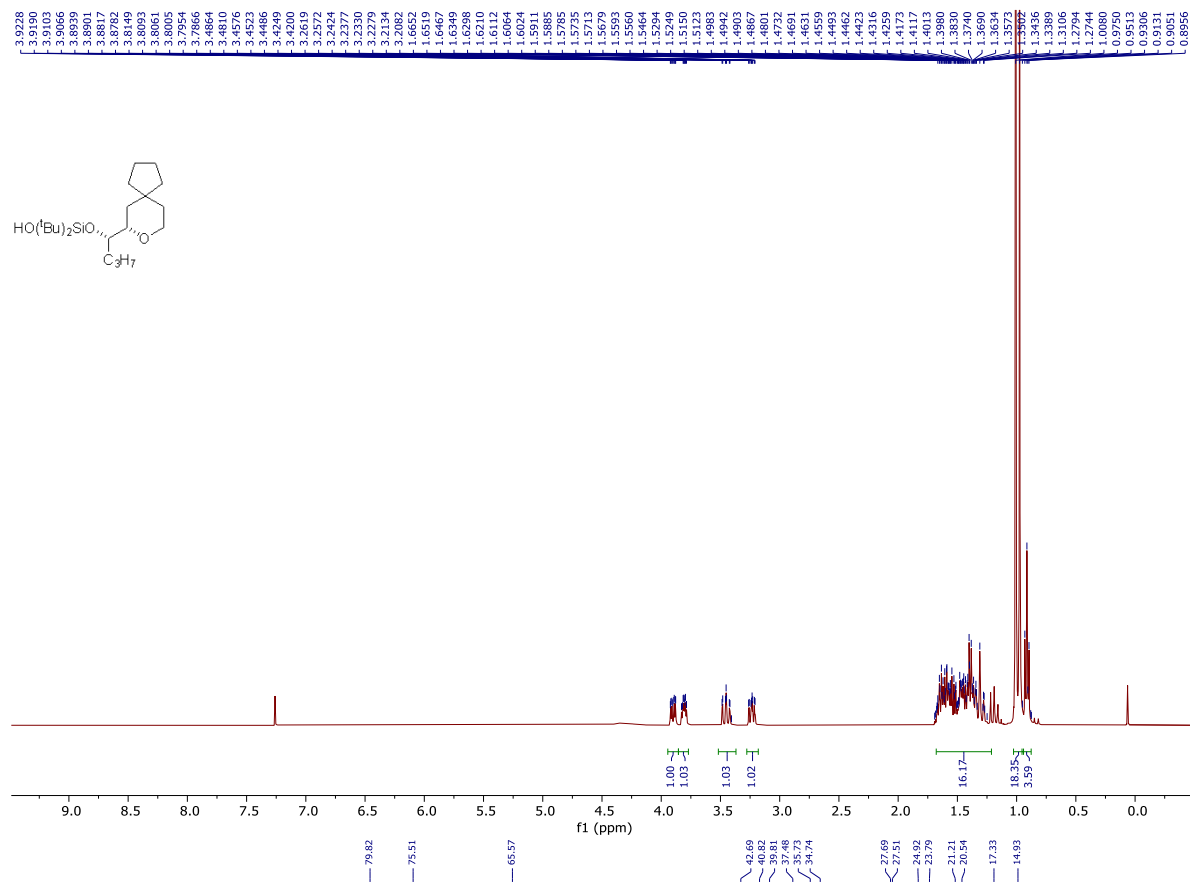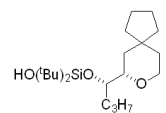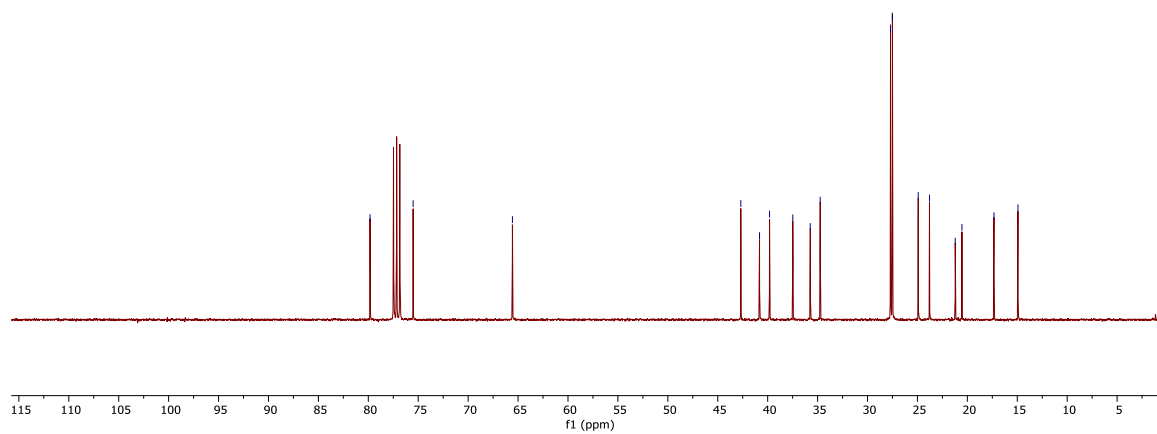



**Compound 75 (CDCl<sub>3</sub>, <sup>1</sup>H NMR: 400 MHz, <sup>13</sup>C{<sup>1</sup>H} NMR: 101 MHz)**

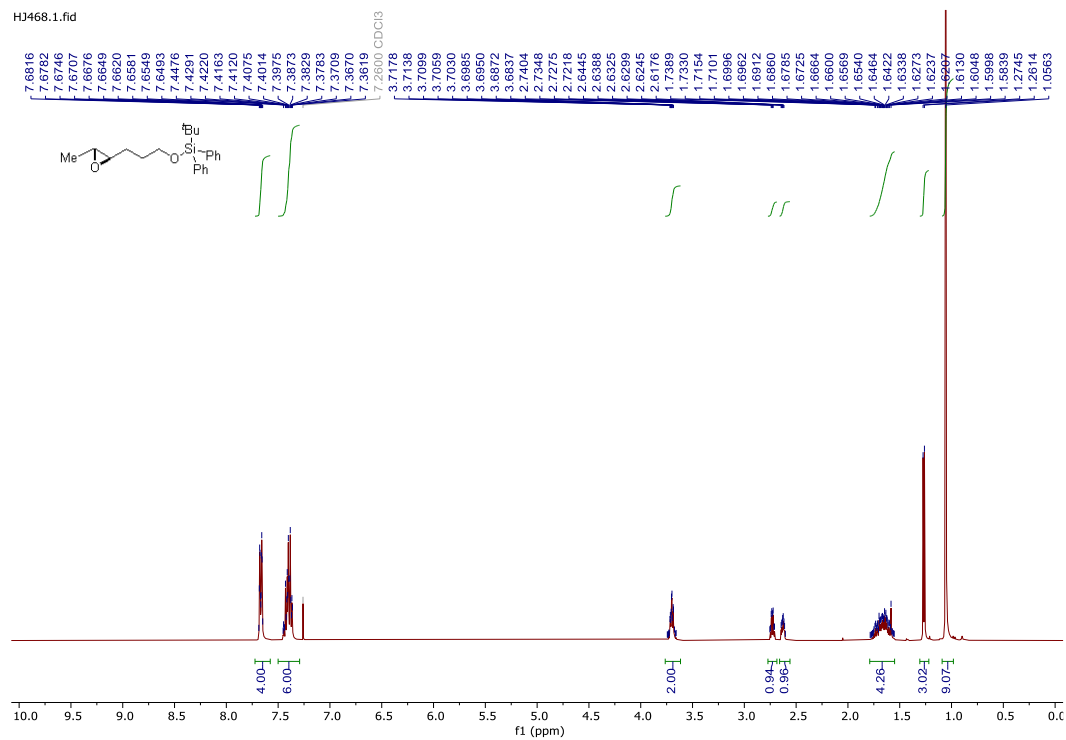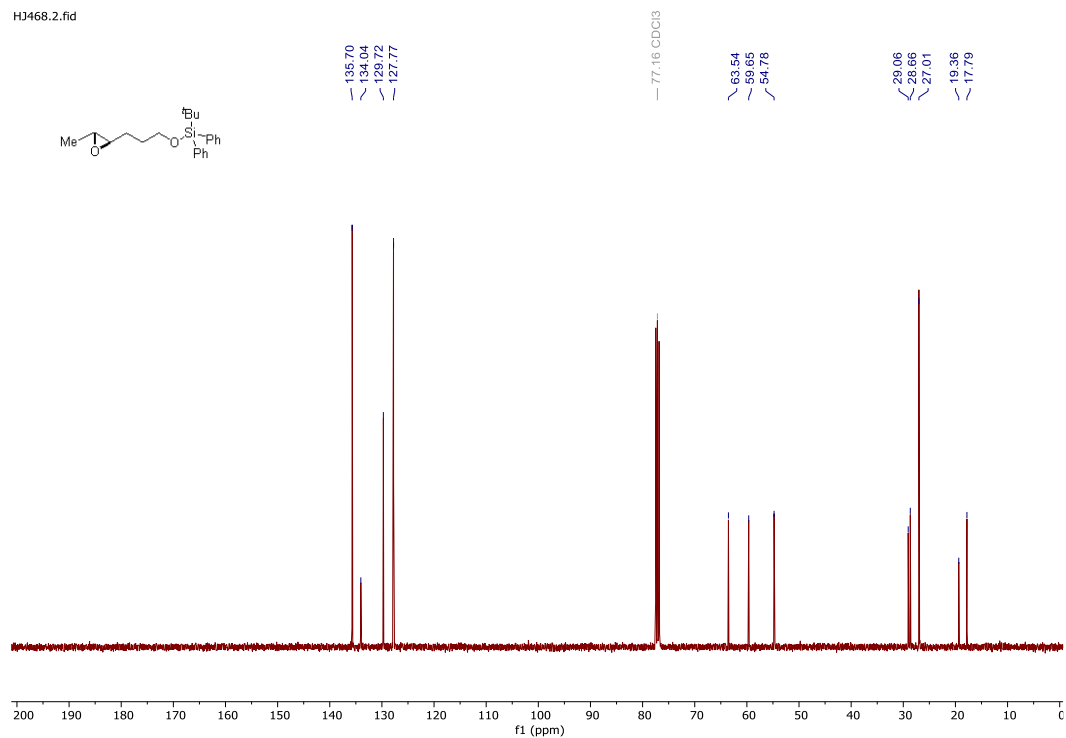

**Compound 76 (CDCl<sub>3</sub>, <sup>1</sup>H NMR: 400 MHz, <sup>13</sup>C{<sup>1</sup>H} NMR: 101 MHz)**

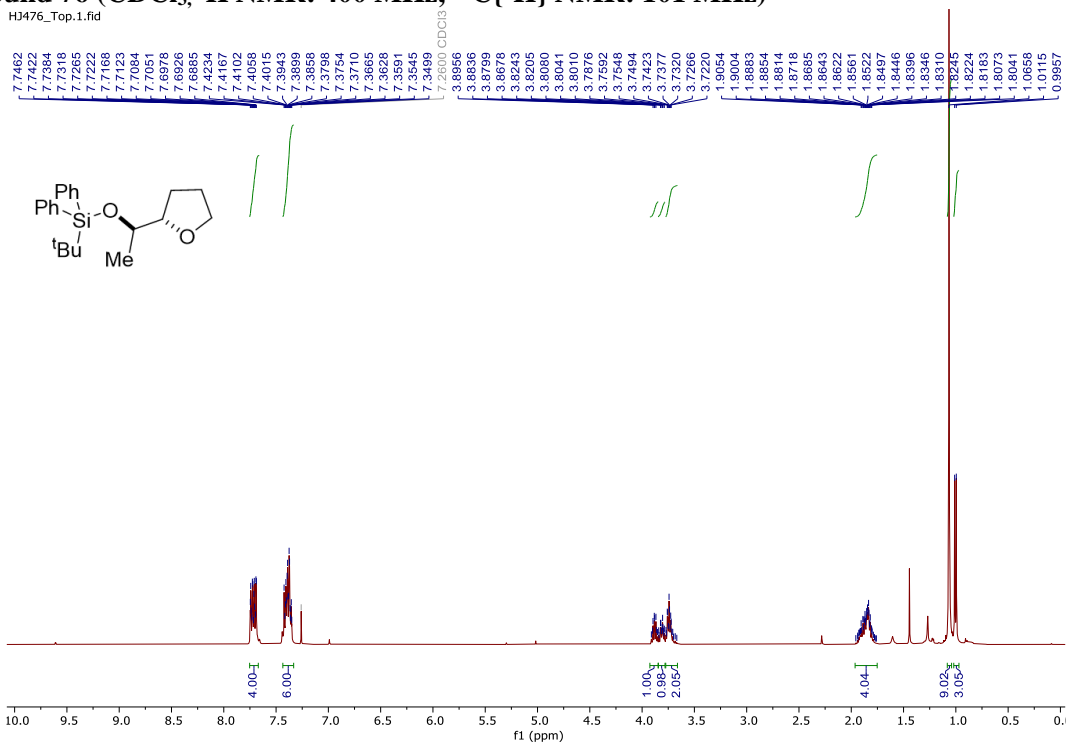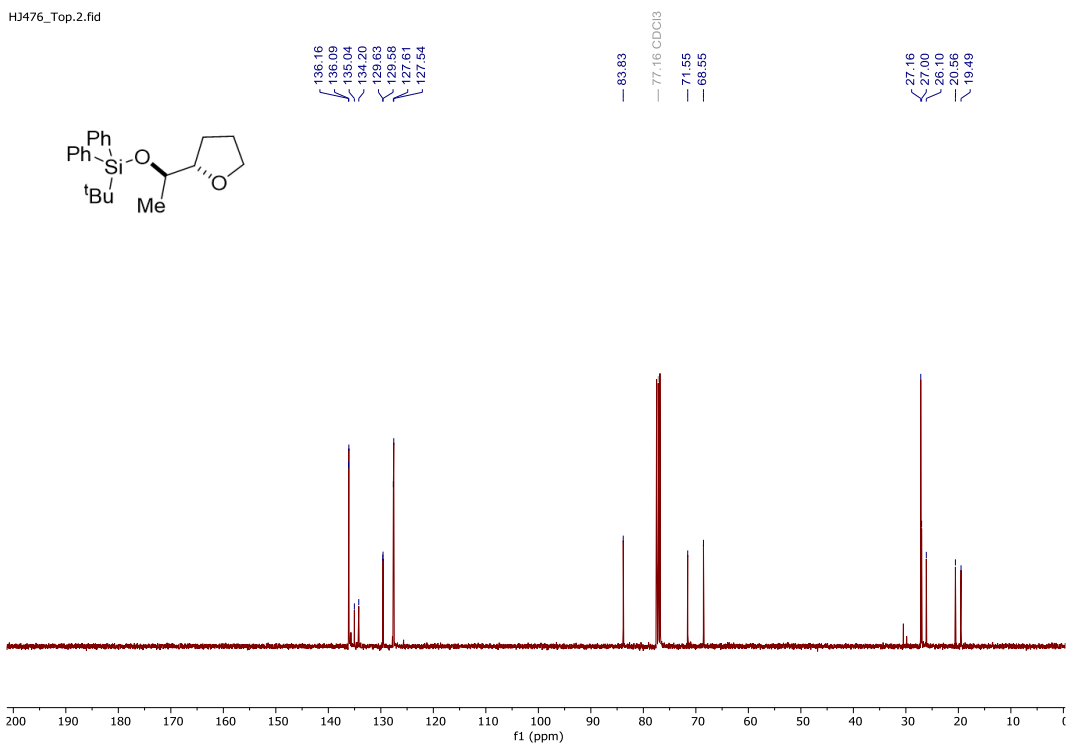

**Compound 77 (CDCl<sub>3</sub>, <sup>1</sup>H NMR: 400 MHz, <sup>13</sup>C{<sup>1</sup>H} NMR: 101 MHz)**

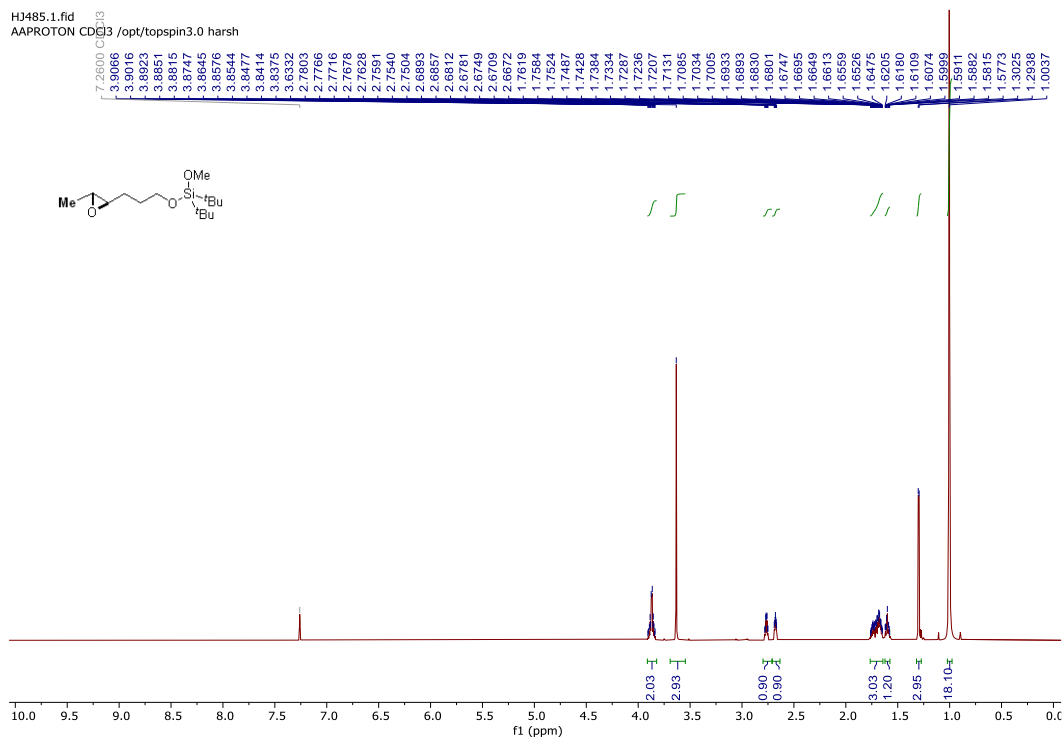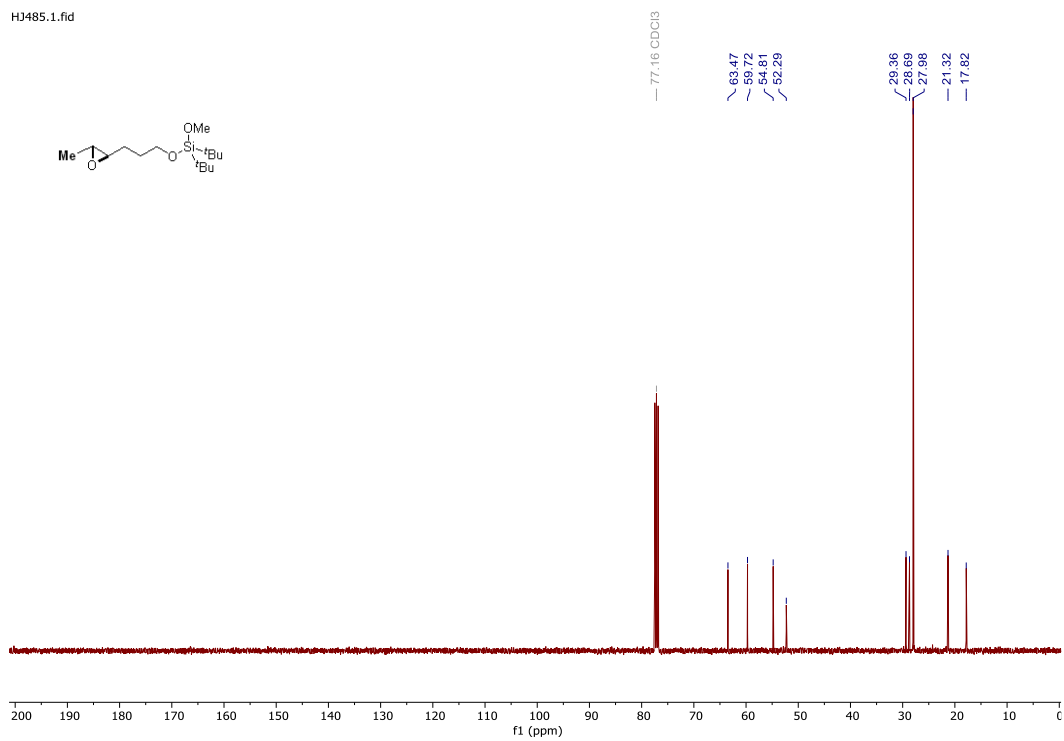

# Compound 78 (CDCl<sub>3</sub>, <sup>1</sup>H NMR: 400 MHz, <sup>13</sup>C{<sup>1</sup>H} NMR: 101 MHz)

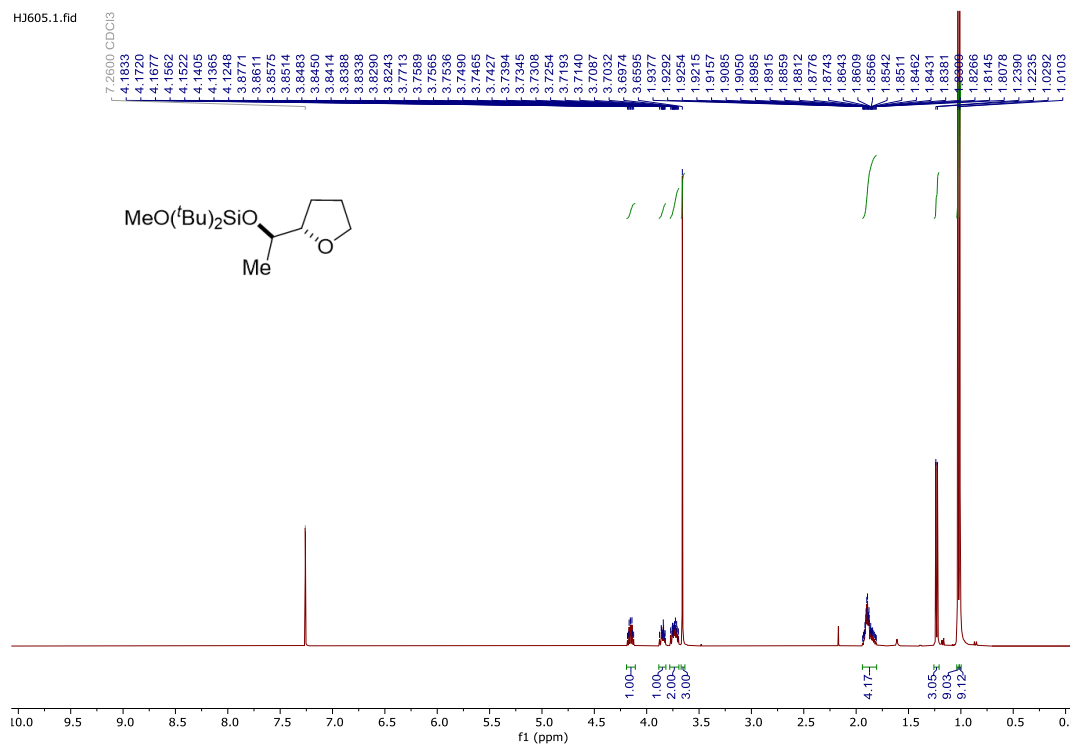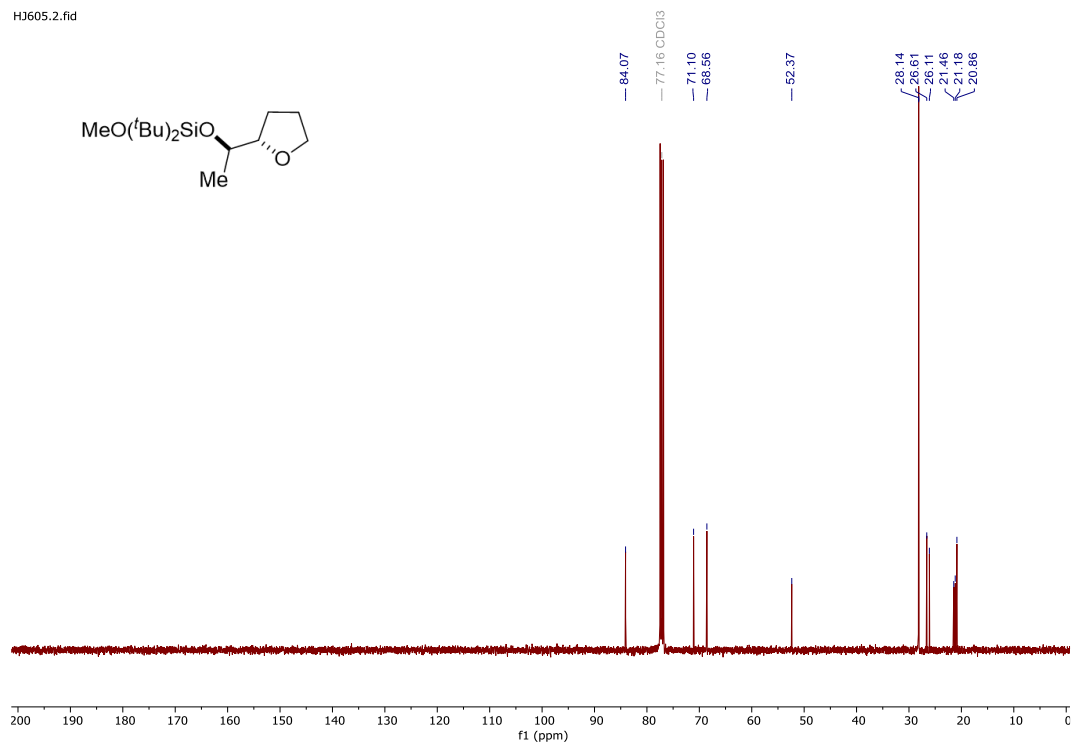

**Compound 79 (CDCl<sub>3</sub>, <sup>1</sup>H NMR: 400 MHz, <sup>13</sup>C{<sup>1</sup>H} NMR: 101 MHz)**

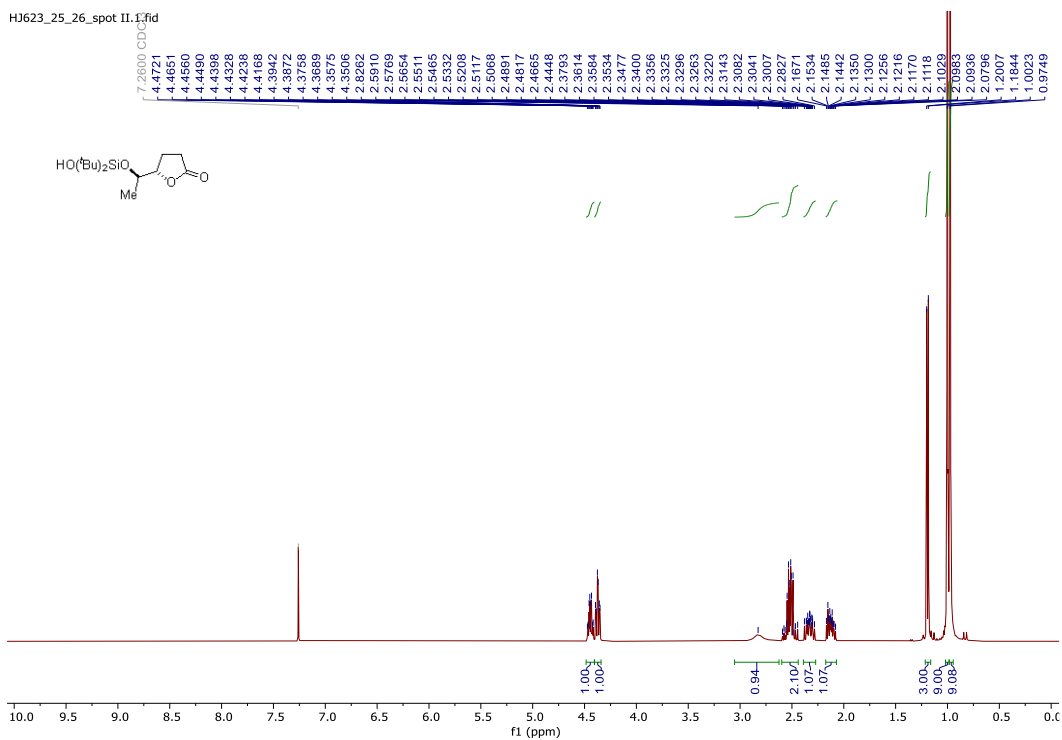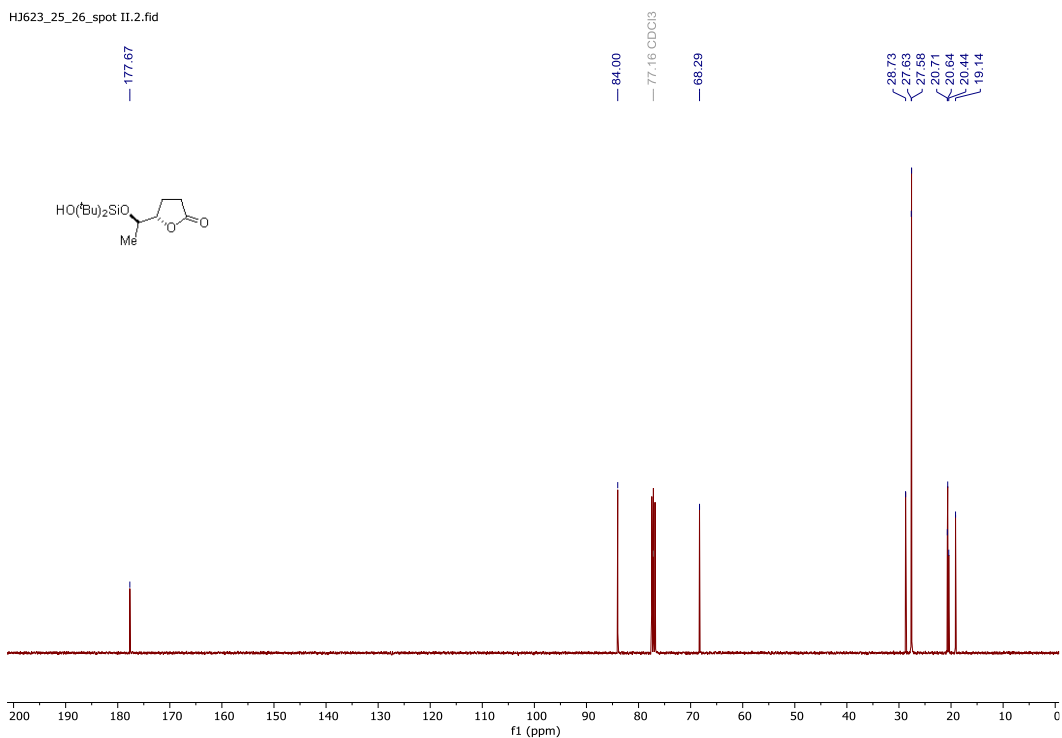

# Compound 80 (CDCl<sub>3</sub>, <sup>1</sup>H NMR: 400 MHz, <sup>13</sup>C{<sup>1</sup>H} NMR: 101 MHz)

HJ637.1.fid

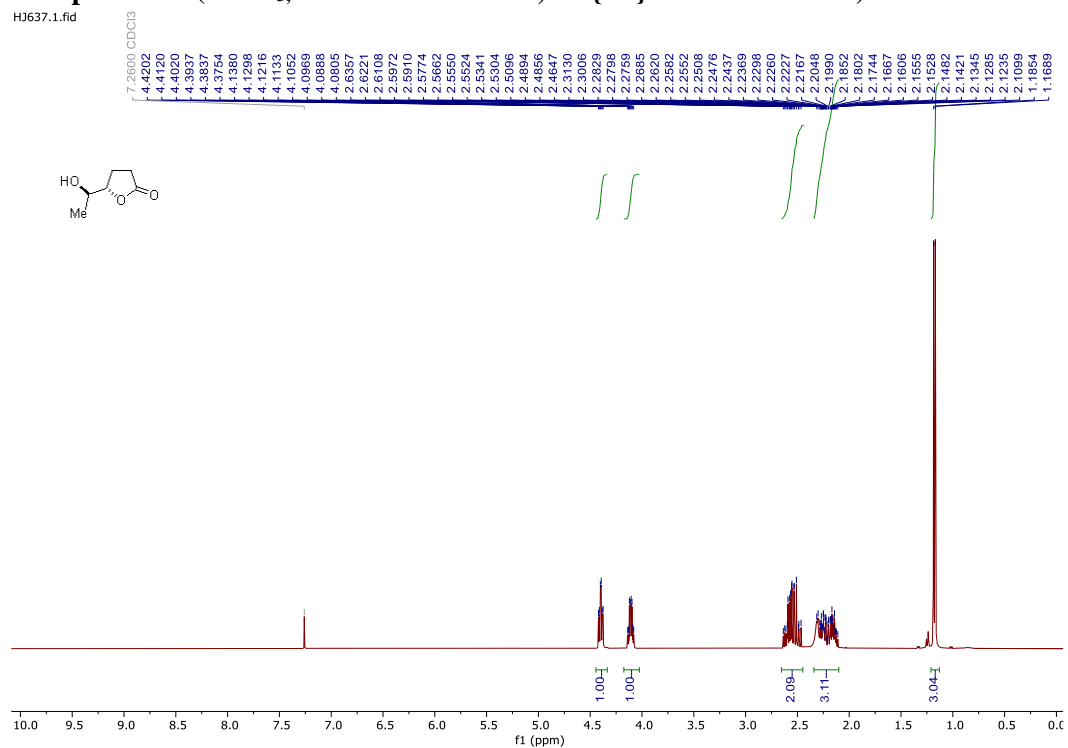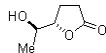

HJ637.2.fid

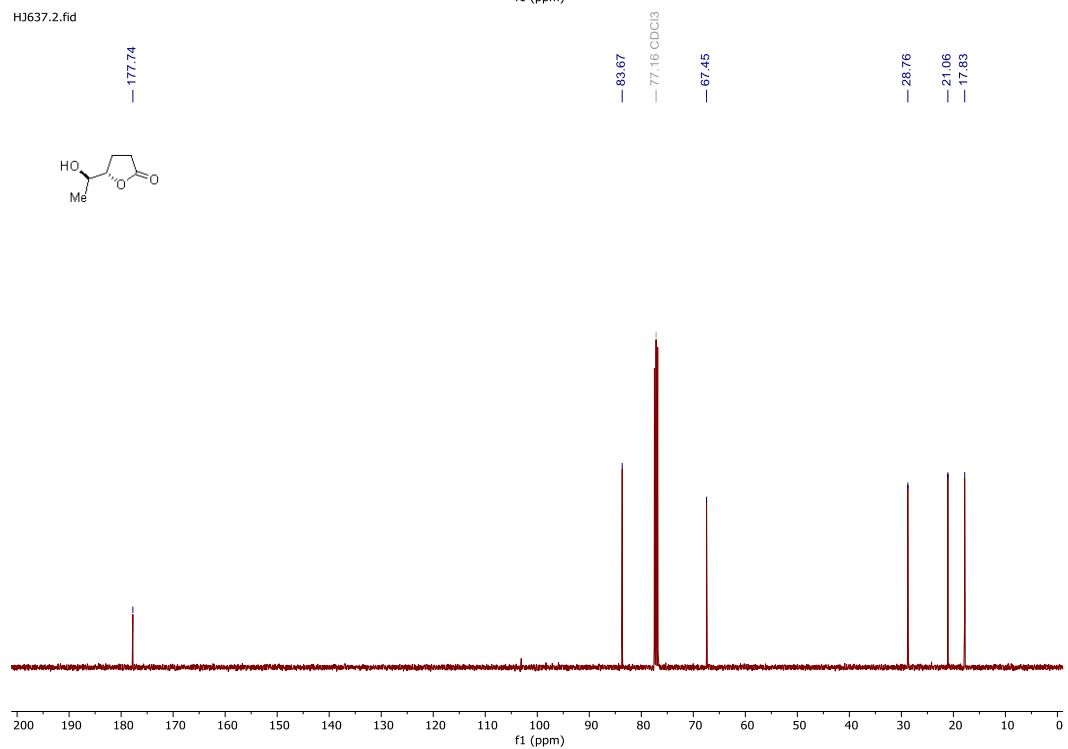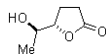

(±)-solerone (CDCl<sub>3</sub>, <sup>1</sup>H NMR: 400 MHz, <sup>13</sup>C{<sup>1</sup>H} NMR: 101 MHz)

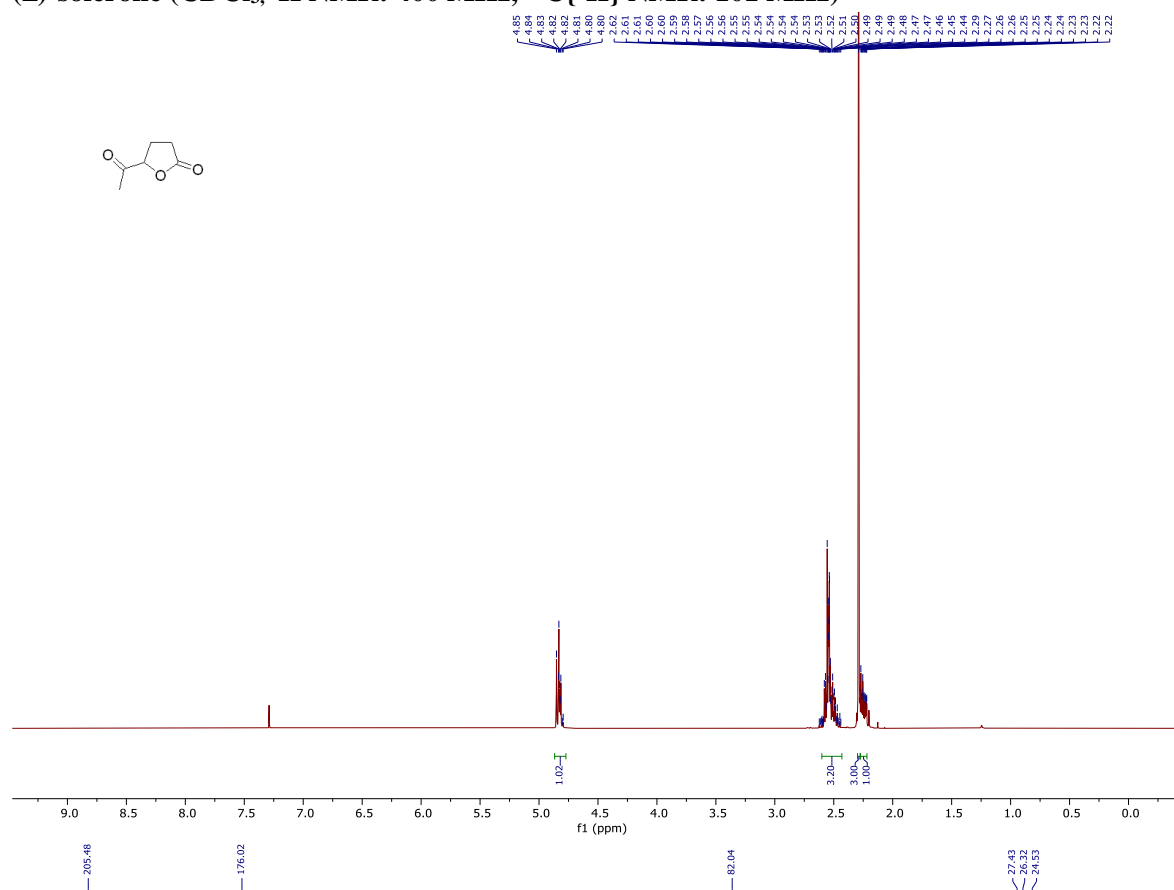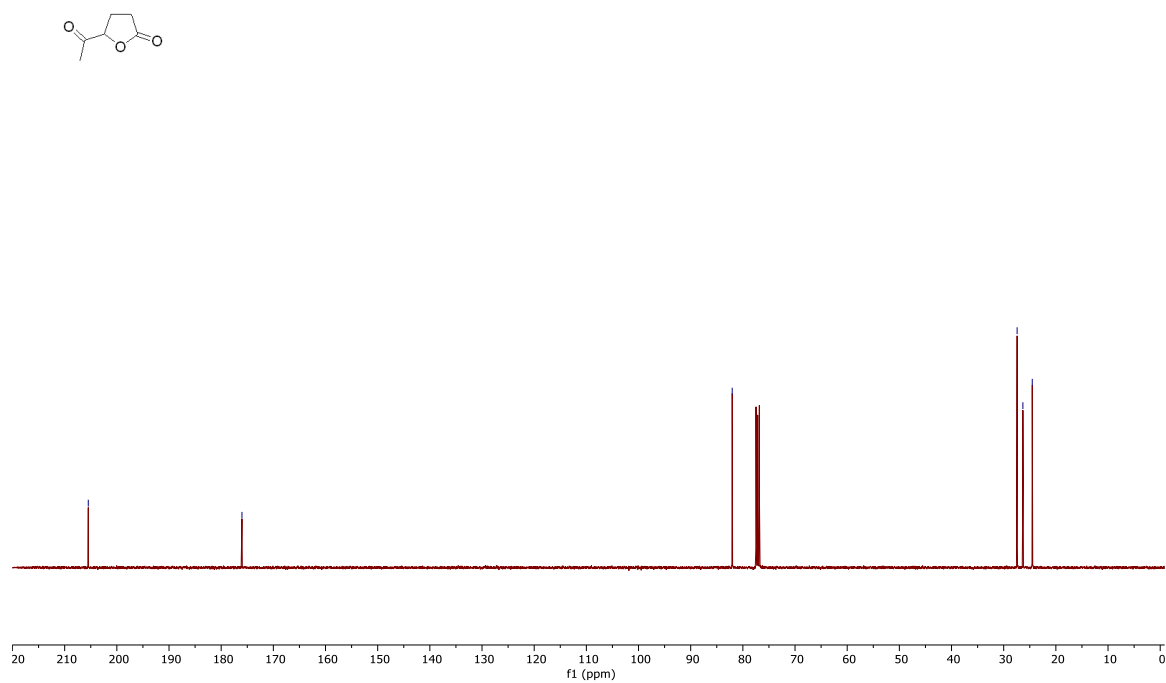

**Compound 81 (CDCl<sub>3</sub>, <sup>1</sup>H NMR: 400 MHz, <sup>13</sup>C{<sup>1</sup>H} NMR: 101 MHz)**

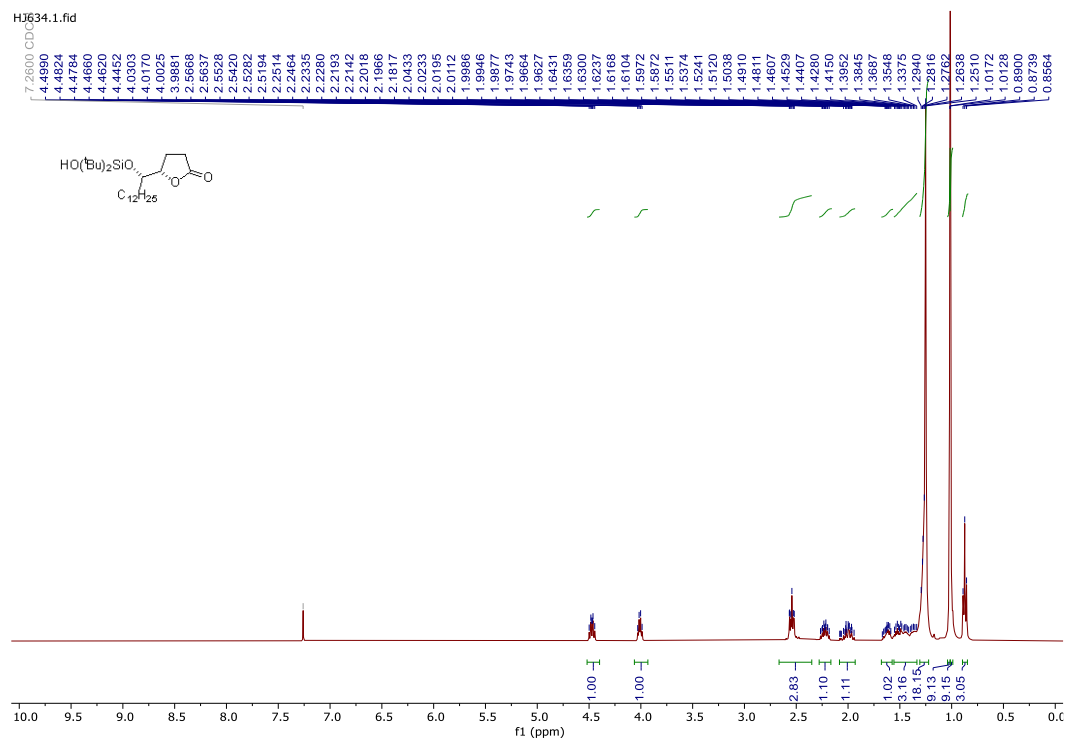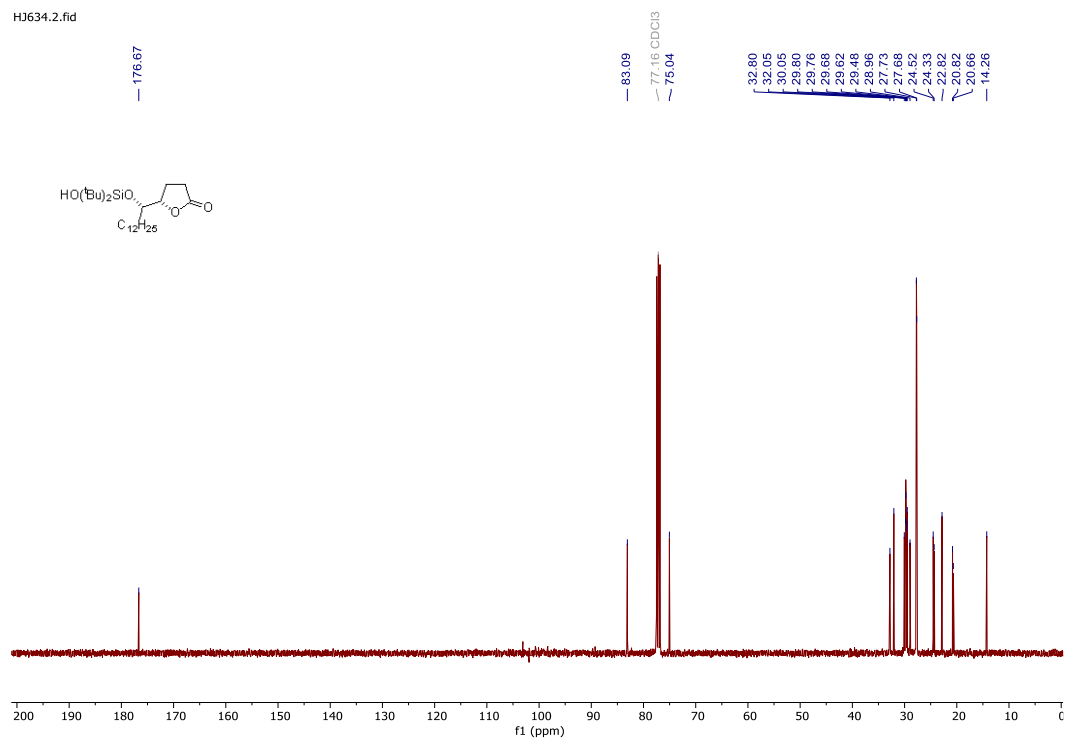



**(±)-muricatacin (CDCl<sub>3</sub>, <sup>1</sup>H NMR: 400 MHz, <sup>13</sup>C{<sup>1</sup>H} NMR: 101 MHz)**

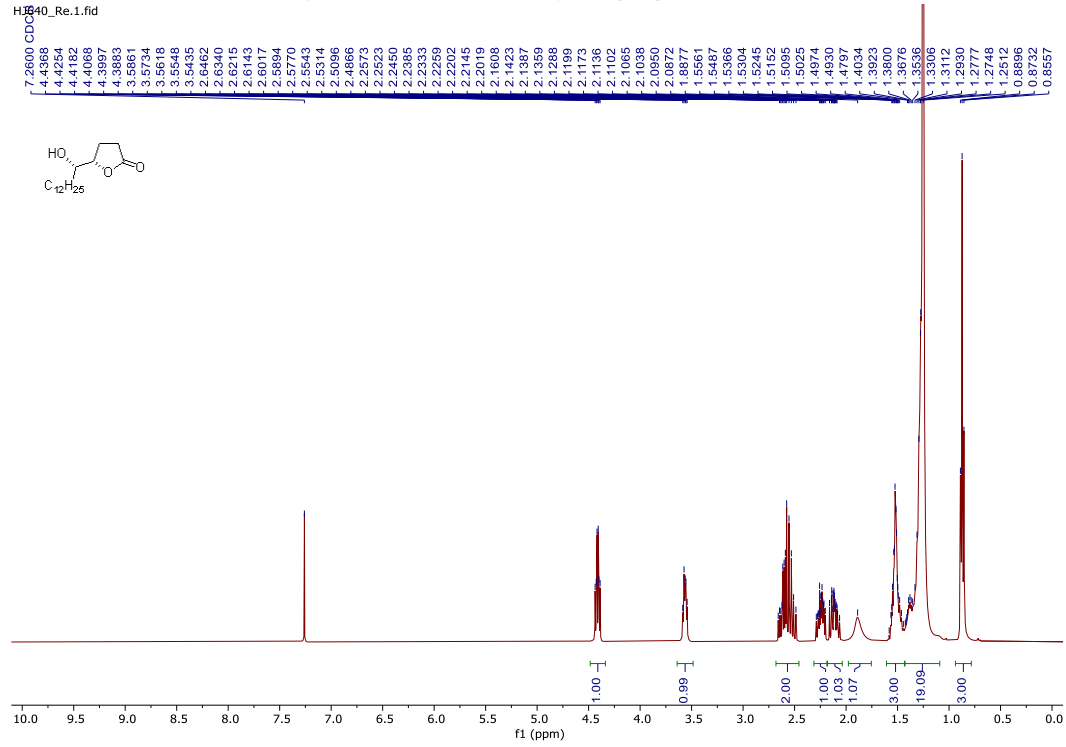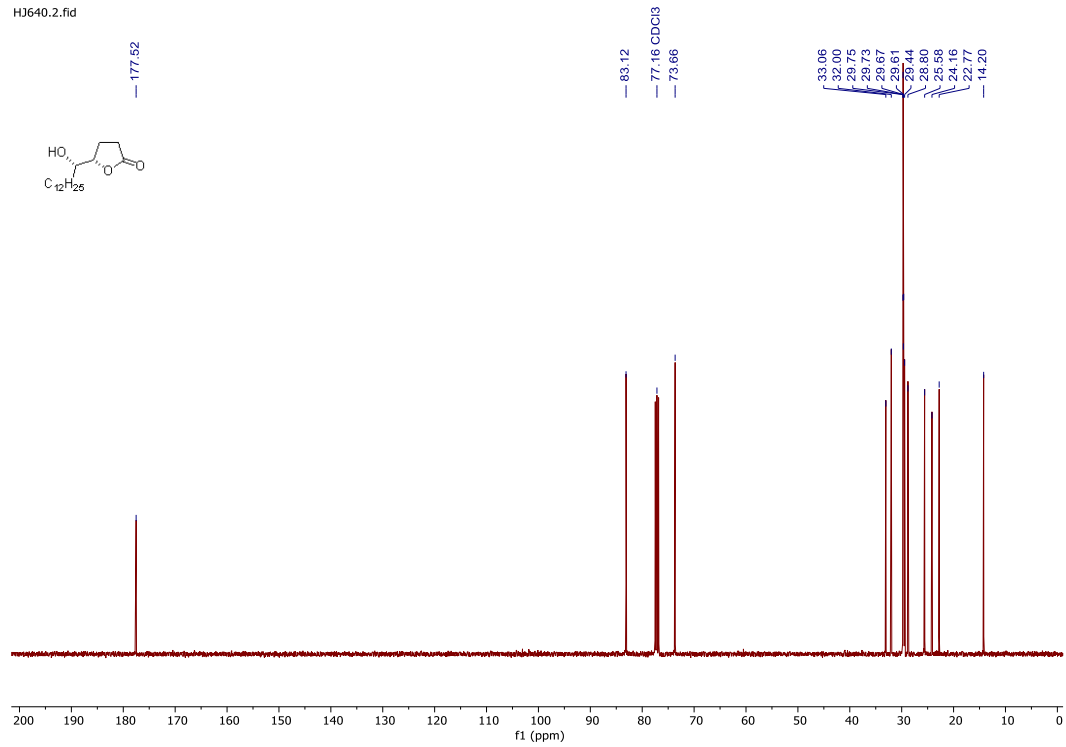

Supplement: d3qo00427a1.pdf [file d3qo00427a1.pdf]
